# Supplementary material for: Complete Genomic Analysis of a Kingdom-Crossing Klebsiella variicola Isolate
Source: Front Microbiol. 2018 Oct 9;9:2428. doi: 10.3389/fmicb.2018.02428 (PMC6189331; doi:10.3389/fmicb.2018.02428)
Supplement: Supplementary file 5 [file Table_5.xlsx]

## Sheet: X39. unique genes
Table S5. The unique genes of K. variicola X39, K. variicola 342, K. variicola DX120E, K. variicola MGH20 and K. variicola MGH40.
Gene_id	{KEGG}	{COG}	{GO}	{VFDB}	{ARDB}
Annotation_num	783	315	400	28	5
X39GM000001	{mpo:Mpop_1250; }	{YP_003773485; COG0583 DNA-binding transcriptional regulator, LysR family K Transcription ;}	{GO:0006355; regulation of transcription, DNA-dependent; biological_process GO:0003700; sequence-specific DNA binding transcription factor activity; molecular_function}	{NA}	{NA}
X39GM000002	{cfd:CFNIH1_25855; }	{YP_001831719; COG0491 Glyoxylase or a related metal-dependent hydrolase, beta-lactamase superfamily II R General function prediction only ;}	{GO:0016787; hydrolase activity; molecular_function}	{NA}	{NA}
X39GM000003	{kpo:KPN2242_15285; K07497 K07497 putative transposase -- }	{YP_004214998; COG2801 Transposase InsO and inactivated derivatives X Mobilome: prophages, transposons;}	{GO:0015074; DNA integration; biological_process}	{VFG014116; CVF520 LPS O-antigen (P_ aeruginosa) PA3142 hypothetical protein - - - -}	{NA}
X39GM000004	{kpb:FH42_26665; }	{NA}	{NA}	{NA}	{NA}
X39GM000006	{ecv:APECO1_O1CoBM107; }	{NA}	{GO:0006313; transposition, DNA-mediated; biological_process GO:0004803; transposase activity; molecular_function GO:0003677; DNA binding; molecular_function}	{NA}	{NA}
X39GM000007	{ekb:BFV64_20135; }	{YP_001981449; COG2197 DNA-binding response regulator, NarL/FixJ family, contains REC and HTH domains TK Signal transduction mechanisms ; Transcription ;}	{GO:0006355; regulation of transcription, DNA-dependent; biological_process GO:0004252; serine-type endopeptidase activity; molecular_function GO:0000160; two-component signal transduction system (phosphorelay); biological_process GO:0003700; sequence-specific DNA binding transcription factor activity; molecular_function GO:0016987; sigma factor activity; molecular_function GO:0006352; transcript…	{NA}	{NA}
X39GM000008	{ekb:BFV64_20130; }	{YP_005887351; COG2205 K+-sensing histidine kinase KdpD T Signal transduction mechanisms ;}	{GO:0005524; ATP binding; molecular_function GO:0006355; regulation of transcription, DNA-dependent; biological_process GO:0016020; membrane; cellular_component GO:0000160; two-component signal transduction system (phosphorelay); biological_process GO:0000155; two-component sensor activity; molecular_function GO:0007165; signal transduction; biological_process GO:0000156; two-component response r…	{NA}	{NA}
X39GM000009	{ekb:BFV64_20125; K11959 urtA urea transport system substrate-binding protein -- Environmental Information Processing; Membrane transport; ABC transporters [PATH:ko02010] }	{YP_003075519; COG0683 ABC-type branched-chain amino acid transport system, periplasmic component E Amino acid transport and metabolism ;}	{GO:0019068; virion assembly; biological_process}	{NA}	{NA}
X39GM000010	{ekb:BFV64_20120; K11960 urtB urea transport system permease protein -- Environmental Information Processing; Membrane transport; ABC transporters [PATH:ko02010] }	{YP_004675352; COG0559 Branched-chain amino acid ABC-type transport system, permease component E Amino acid transport and metabolism ;}	{GO:0005215; NA GO:0006810; transport; biological_process GO:0016020; membrane; cellular_component}	{NA}	{NA}
X39GM000011	{ekb:BFV64_20115; K11961 urtC urea transport system permease protein -- Environmental Information Processing; Membrane transport; ABC transporters [PATH:ko02010] }	{YP_006382127; COG4177 ABC-type branched-chain amino acid transport system, permease component E Amino acid transport and metabolism ;}	{GO:0016020; membrane; cellular_component GO:0006810; transport; biological_process GO:0005215; NA}	{NA}	{NA}
X39GM000012	{ekb:BFV64_20110; K11962 urtD urea transport system ATP-binding protein -- Environmental Information Processing; Membrane transport; ABC transporters [PATH:ko02010] }	{YP_001981455; COG4674 ABC-type uncharacterized transport system, ATPase component R General function prediction only ;}	{GO:0005525; GTP binding; molecular_function GO:0005524; ATP binding; molecular_function GO:0016887; ATPase activity; molecular_function GO:0003924; GTPase activity; molecular_function}	{NA}	{NA}
X39GM000013	{ekb:BFV64_20105; K11963 urtE urea transport system ATP-binding protein -- Environmental Information Processing; Membrane transport; ABC transporters [PATH:ko02010] }	{YP_003075523; COG0410 ABC-type branched-chain amino acid transport system, ATPase component E Amino acid transport and metabolism ;}	{GO:0030261; chromosome condensation; biological_process GO:0070526; threonylcarbamoyladenosine biosynthetic process; biological_process GO:0043531; ADP binding; molecular_function GO:0003677; DNA binding; molecular_function GO:0006614; SRP-dependent cotranslational protein targeting to membrane; biological_process GO:0005525; GTP binding; molecular_function GO:0005524; ATP binding; molecular_fun…	{NA}	{NA}
X39GM000014	{ekb:BFV64_20100; K01455 E3.5.1.49 formamidase 3.5.1.49 Metabolism; Metabolism of other amino acids; Cyanoamino acid metabolism [PATH:ko00460] Metabolism; Carbohydrate metabolism; Glyoxylate and dicarboxylate metabolism [PATH:ko00630] Metabolism; Energy metabolism; Nitrogen metabolism [PATH:ko00910] }	{NP_930440; COG0388 Predicted amidohydrolase R General function prediction only ;}	{GO:0006807; nitrogen compound metabolic process; biological_process GO:0008152; NA GO:0003824; NA GO:0016810; hydrolase activity, acting on carbon-nitrogen (but not peptide) bonds; molecular_function}	{NA}	{NA}
X39GM000015	{csi:P262_05133; K07480 insB insertion element IS1 protein InsB -- }	{YP_003602741; COG1662 Transposase and inactivated derivatives, IS1 family X Mobilome: prophages, transposons;}	{GO:0006313; transposition, DNA-mediated; biological_process GO:0004803; transposase activity; molecular_function GO:0003677; DNA binding; molecular_function}	{NA}	{NA}
X39GM000016	{kpa:KPNJ1_05525; }	{YP_523955; COG2963 Transposase and inactivated derivatives X Mobilome: prophages, transposons;}	{GO:0009636; response to toxin; biological_process GO:0006313; transposition, DNA-mediated; biological_process GO:0004803; transposase activity; molecular_function GO:0003677; DNA binding; molecular_function GO:0015643; toxin binding; molecular_function GO:0031342; negative regulation of cell killing; biological_process}	{NA}	{NA}
X39GM000017	{ekb:BFV64_20080; }	{NA}	{NA}	{NA}	{NA}
X39GM000018	{kpa:KPNJ1_05526; }	{YP_004387954; COG3311 Predicted DNA-binding transcriptional regulator AlpA KX Transcription ; Mobilome: prophages, transposons;}	{NA}	{NA}	{NA}
X39GM000019	{kpa:KPNJ1_05527; K13993 HSP20 HSP20 family protein -- Genetic Information Processing; Folding, sorting and degradation; Protein processing in endoplasmic reticulum [PATH:ko04141] }	{YP_003614178; COG0071 Molecular chaperone IbpA, HSP20 family O Posttranslational modification, protein turnover, chaperones ;}	{NA}	{NA}	{NA}
X39GM000020	{kpa:KPNJ1_05528; K03696 clpC ATP-dependent Clp protease ATP-binding subunit ClpC -- }	{YP_003614179; COG0542 ATP-dependent Clp protease ATP-binding subunit ClpA O Posttranslational modification, protein turnover, chaperones ;}	{GO:0006355; regulation of transcription, DNA-dependent; biological_process GO:0007264; small GTPase mediated signal transduction; biological_process GO:0015995; chlorophyll biosynthetic process; biological_process GO:0006310; DNA recombination; biological_process GO:0005524; ATP binding; molecular_function GO:0070526; threonylcarbamoyladenosine biosynthetic process; biological_process GO:0051085…	{VFG000079; VF0072 ClpC clpC endopeptidase Clp ATP-binding chain C 27-kDa stress protein belongs to the Hsp100/Clp family; Regulation of Clp protease expression is mediated by CtsR, the product of the first gene in the ClpC operon - An ATPase promoting early escape form the phagosome of macrophages;ClpC is also required for adhesion and invasion, possibly by modulating the expression of InlA,InlB…	{NA}
X39GM000021	{kpa:KPNJ1_05529; }	{NA}	{GO:0009405; pathogenesis; biological_process GO:0044179; hemolysis in other organism; biological_process}	{NA}	{NA}
X39GM000022	{csz:CSSP291_04325; }	{YP_004625185; COG3431 Uncharacterized membrane protein, DUF373 family S Function unknown ;}	{NA}	{NA}	{NA}
X39GM000023	{kpa:KPNJ1_05531; K03799 htpX heat shock protein HtpX 3.4.24.- }	{YP_003614182; COG0501 Zn-dependent protease with chaperone function O Posttranslational modification, protein turnover, chaperones ;}	{GO:0004222; metalloendopeptidase activity; molecular_function GO:0006508; proteolysis; biological_process GO:0016020; membrane; cellular_component}	{NA}	{NA}
X39GM000024	{NA}	{NA}	{NA}	{NA}	{NA}
X39GM000025	{kpa:KPNJ1_05532; }	{NA}	{GO:0016020; membrane; cellular_component GO:0009405; pathogenesis; biological_process GO:0005643; nuclear pore; cellular_component GO:0006606; protein import into nucleus; biological_process}	{NA}	{NA}
X39GM000026	{csz:CSSP291_04310; }	{YP_003614184; COG2801 Transposase InsO and inactivated derivatives X Mobilome: prophages, transposons;}	{GO:0015074; DNA integration; biological_process}	{NA}	{NA}
X39GM000028	{kpy:KPNIH31_02735; }	{NA}	{NA}	{NA}	{NA}
X39GM000032	{NA}	{NA}	{NA}	{NA}	{NA}
X39GM000033	{sbc:SbBS512_A0018; K07484 K07484 transposase -- }	{NP_308356; COG3436 Transposase X Mobilome: prophages, transposons;}	{NA}	{NA}	{NA}
X39GM000034	{kpv:KPNIH29_19055; K07484 K07484 transposase -- }	{NA}	{GO:0007049; cell cycle; biological_process GO:0042025; host cell nucleus; cellular_component GO:0006633; fatty acid biosynthetic process; biological_process GO:0019072; viral genome packaging; biological_process GO:0005737; cytoplasm; cellular_component GO:0048870; cell motility; biological_process GO:0003989; acetyl-CoA carboxylase activity; molecular_function GO:0051082; unfolded protein bindi…	{NA}	{NA}
X39GM000035	{eno:ECENHK_10390; }	{YP_006986178; COG0300 Short-chain dehydrogenase R General function prediction only ;}	{GO:0008643; carbohydrate transport; biological_process GO:0016491; oxidoreductase activity; molecular_function GO:0042597; periplasmic space; cellular_component GO:0008152; NA}	{NA}	{NA}
X39GM000036	{eno:ECENHK_10385; K19577 ydhP MFS transporter, DHA1 family, inner membrane transport protein -- }	{YP_001020069; COG2814 Predicted arabinose efflux permease, MFS family G Carbohydrate transport and metabolism ;}	{GO:0016021; integral to membrane; cellular_component GO:0055085; transmembrane transport; biological_process}	{NA}	{NA}
X39GM000037	{eno:ECENHK_10380; K07098 K07098 uncharacterized protein -- }	{YP_001603929; COG1408 Predicted phosphohydrolase, MPP superfamily R General function prediction only ;}	{GO:0016787; hydrolase activity; molecular_function}	{NA}	{NA}
X39GM000038	{eno:ECENHK_10375; }	{YP_002799741; COG0583 DNA-binding transcriptional regulator, LysR family K Transcription ;}	{GO:0006355; regulation of transcription, DNA-dependent; biological_process GO:0003700; sequence-specific DNA binding transcription factor activity; molecular_function}	{NA}	{NA}
X39GM000039	{kpc:KPNIH10_27860; }	{NA}	{GO:0016773; phosphotransferase activity, alcohol group as acceptor; molecular_function}	{NA}	{NA}
X39GM000041	{koe:A225_NDM1p0255; }	{YP_003211649; COG5001 Predicted signal transduction protein containing a membrane domain, an EAL and a GGDEF domain T Signal transduction mechanisms ;}	{GO:0006275; regulation of DNA replication; biological_process GO:0006355; regulation of transcription, DNA-dependent; biological_process GO:0003677; DNA binding; molecular_function}	{NA}	{NA}
X39GM000042	{seec:CFSAN002050_01035; K07481 K07481 transposase, IS5 family -- }	{NP_414793; COG3039 Transposase and inactivated derivatives, IS5 family X Mobilome: prophages, transposons;}	{GO:0003677; DNA binding; molecular_function GO:0006313; transposition, DNA-mediated; biological_process GO:0004803; transposase activity; molecular_function}	{NA}	{NA}
X39GM000043	{NA}	{NA}	{NA}	{NA}	{NA}
X39GM000044	{NA}	{NA}	{NA}	{NA}	{NA}
X39GM000045	{pses:PSCI_4418; }	{NA}	{NA}	{NA}	{NA}
X39GM000050	{koc:AB185_00590; }	{YP_003625462; COG3344 Retron-type reverse transcriptase X Mobilome: prophages, transposons;}	{GO:0003964; RNA-directed DNA polymerase activity; molecular_function GO:0006278; RNA-dependent DNA replication; biological_process GO:0003968; RNA-directed RNA polymerase activity; molecular_function GO:0003723; RNA binding; molecular_function GO:0006351; transcription, DNA-dependent; biological_process}	{NA}	{NA}
X39GM000051	{kin:AB182_01805; }	{NA}	{NA}	{NA}	{NA}
X39GM000052	{NA}	{NA}	{NA}	{NA}	{NA}
X39GM000053	{koc:AB185_00595; K03503 umuD DNA polymerase V 3.4.21.- }	{YP_003602563; COG1974 SOS-response transcriptional repressor LexA (RecA-mediated autopeptidase) KT Transcription ; Signal transduction mechanisms ;}	{NA}	{NA}	{NA}
X39GM000057	{NA}	{NA}	{GO:0030246; carbohydrate binding; molecular_function GO:0002682; regulation of immune system process; biological_process GO:0008270; zinc ion binding; molecular_function}	{NA}	{NA}
X39GM000058	{cfar:CI104_28035; }	{NA}	{GO:0003887; DNA-directed DNA polymerase activity; molecular_function GO:0006270; DNA-dependent DNA replication initiation; biological_process GO:0005727; extrachromosomal circular DNA; cellular_component}	{NA}	{NA}
X39GM000059	{pstw:DSJ_22620; }	{NA}	{NA}	{NA}	{NA}
X39GM000060	{etw:ECSP_1297; K07480 insB insertion element IS1 protein InsB -- }	{NP_309399; COG1662 Transposase and inactivated derivatives, IS1 family X Mobilome: prophages, transposons;}	{GO:0003677; DNA binding; molecular_function GO:0006313; transposition, DNA-mediated; biological_process GO:0004803; transposase activity; molecular_function}	{NA}	{NA}
X39GM000061	{kom:HR38_28460; K18929 lldF L-lactate dehydrogenase complex protein LldF -- }	{YP_001455741; COG1139 L-lactate utilization protein LutB, contains a ferredoxin-type domain C Energy production and conversion ;}	{GO:0051536; iron-sulfur cluster binding; molecular_function}	{NA}	{NA}
X39GM000062	{kom:HR38_28465; K00782 lldG L-lactate dehydrogenase complex protein LldG -- }	{YP_001455742; COG1556 L-lactate utilization protein LutC, contains LUD domain C Energy production and conversion ;}	{GO:0055114; oxidation-reduction process; biological_process GO:0016491; oxidoreductase activity; molecular_function}	{NA}	{NA}
X39GM000063	{kom:HR38_28470; K16321 gntP high-affinity gluconate transporter -- }	{NA}	{GO:0016020; membrane; cellular_component GO:0035429; gluconate transmembrane transport; biological_process GO:0015128; gluconate transmembrane transporter activity; molecular_function}	{NA}	{NA}
X39GM000064	{kom:HR38_28475; K19166 higB mRNA interferase HigB 3.1.-.- }	{YP_006281419; COG4680 mRNA-degrading endonuclease (mRNA interferase) HigB, toxic component of the HigAB toxin-antitoxin module J Translation, ribosomal structure and biogenesis ;}	{GO:0016788; hydrolase activity, acting on ester bonds; molecular_function}	{NA}	{NA}
X39GM000065	{kom:HR38_28480; K18831 higA HTH-type transcriptional regulator / antitoxin HigA -- }	{YP_006281420; COG5499 Antitoxin component HigA of the HigAB toxin-antitoxin module, contains an N-terminal HTH domain V Defense mechanisms ;}	{GO:0043565; sequence-specific DNA binding; molecular_function}	{NA}	{NA}
X39GM000066	{kom:HR38_28485; }	{NA}	{NA}	{NA}	{NA}
X39GM000067	{kom:HR38_28490; }	{NA}	{NA}	{NA}	{NA}
X39GM000068	{kom:HR38_28495; }	{NA}	{NA}	{NA}	{NA}
X39GM000069	{kom:HR38_28500; }	{NA}	{NA}	{NA}	{NA}
X39GM000070	{NA}	{NA}	{NA}	{NA}	{NA}
X39GM000076	{ete:ETEE_p1015; K01551 arsA, ASNA1, GET3 arsenite/tail-anchored protein-transporting ATPase 3.6.3.16 3.6.3.- }	{YP_003212787; COG0003 Anion-transporting ATPase, ArsA/GET3 family P Inorganic ion transport and metabolism ;}	{NA}	{NA}	{NA}
X39GM000077	{sec:SCH_169; }	{YP_006282446; COG4584 Transposase X Mobilome: prophages, transposons;}	{GO:0006352; transcription initiation, DNA-dependent; biological_process GO:0003677; DNA binding; molecular_function GO:0006508; proteolysis; biological_process GO:0000150; recombinase activity; molecular_function GO:0016987; sigma factor activity; molecular_function GO:0005524; ATP binding; molecular_function GO:0003700; sequence-specific DNA binding transcription factor activity; molecular_func…	{NA}	{NA}
X39GM000078	{sew:SeSA_B0019; }	{YP_006282445; COG1484 DNA replication protein DnaC L Replication, recombination and repair ;}	{GO:0005525; GTP binding; molecular_function GO:0005524; ATP binding; molecular_function GO:0006281; DNA repair; biological_process GO:0008134; transcription factor binding; molecular_function GO:0003924; GTPase activity; molecular_function GO:0016887; ATPase activity; molecular_function GO:0006355; regulation of transcription, DNA-dependent; biological_process GO:0009378; four-way junction helic…	{NA}	{NA}
X39GM000079	{NA}	{NA}	{NA}	{NA}	{NA}
X39GM000080	{cwe:CO701_02000; K07481 K07481 transposase, IS5 family -- }	{NP_414793; COG3039 Transposase and inactivated derivatives, IS5 family X Mobilome: prophages, transposons;}	{GO:0006313; transposition, DNA-mediated; biological_process GO:0004803; transposase activity; molecular_function GO:0003677; DNA binding; molecular_function}	{NA}	{NA}
X39GM000081	{sec:SCH_170; }	{YP_159632; COG1401 5-methylcytosine-specific restriction endonuclease McrBC, GTP-binding regulatory subunit McrB V Defense mechanisms ;}	{NA}	{NA}	{NA}
X39GM000082	{sec:SCH_171; K20993 estP pyrethroid hydrolase 3.1.1.88 }	{NA}	{GO:0006313; transposition, DNA-mediated; biological_process GO:0005737; cytoplasm; cellular_component}	{NA}	{NA}
X39GM000085	{eab:ECABU_c32760; K07483 K07483 transposase -- }	{NP_414894; COG2963 Transposase and inactivated derivatives X Mobilome: prophages, transposons;}	{GO:0005634; nucleus; cellular_component GO:0000978; RNA polymerase II core promoter proximal region sequence-specific DNA binding; molecular_function GO:0006355; regulation of transcription, DNA-dependent; biological_process GO:0003677; DNA binding; molecular_function GO:0004803; transposase activity; molecular_function GO:0006313; transposition, DNA-mediated; biological_process GO:0000982; RNA …	{NA}	{NA}
X39GM000086	{kpr:KPR_1702; K07497 K07497 putative transposase -- }	{NP_414895; COG2801 Transposase InsO and inactivated derivatives X Mobilome: prophages, transposons;}	{GO:0015074; DNA integration; biological_process}	{NA}	{NA}
X39GM000087	{NA}	{NA}	{NA}	{NA}	{NA}
X39GM000088	{kpx:PMK1_ndm00327; }	{NA}	{NA}	{NA}	{NA}
X39GM000089	{kpx:PMK1_ndm00326; }	{NA}	{NA}	{NA}	{NA}
X39GM000090	{kpx:PMK1_ndm00326; }	{NA}	{NA}	{NA}	{NA}
X39GM000091	{kpx:PMK1_ndm00325; }	{NA}	{NA}	{NA}	{NA}
X39GM000092	{kpx:PMK1_ndm00324; }	{NA}	{NA}	{NA}	{NA}
X39GM000093	{kpx:PMK1_ndm00324; }	{NA}	{GO:0016151; nickel ion binding; molecular_function GO:0006464; protein modification process; biological_process}	{NA}	{NA}
X39GM000094	{sez:Sez_0733; }	{NP_414563; COG3677 Transposase X Mobilome: prophages, transposons;}	{GO:0006313; transposition, DNA-mediated; biological_process}	{NA}	{NA}
X39GM000095	{elh:ETEC_4637; K07480 insB insertion element IS1 protein InsB -- }	{NP_414562; COG1662 Transposase and inactivated derivatives, IS1 family X Mobilome: prophages, transposons;}	{GO:0004803; transposase activity; molecular_function GO:0006313; transposition, DNA-mediated; biological_process GO:0003677; DNA binding; molecular_function}	{NA}	{NA}
X39GM000096	{kok:KONIH1_29685; }	{YP_518986; COG0457 Tetratricopeptide (TPR) repeat R General function prediction only ;}	{GO:0005515; protein binding; molecular_function}	{VFG042133; SS026 T3SS mlr6325 hypothetical protein Similar to the Yersinia T3SS - A needle-like structure, often described as an injectisome that can inject effectors directly into the cytoplasm of target cells; five effectors have been described: AexT, AexU, AopP, AopH and AopO;AexT and AexU are bifunctional toxins that contain a GTPase activating domain, allowing the interruption of host cell-…	{NA}
X39GM000097	{koc:AB185_04855; }	{YP_004118622; COG2801 Transposase InsO and inactivated derivatives X Mobilome: prophages, transposons;}	{GO:0015074; DNA integration; biological_process}	{NA}	{NA}
X39GM000098	{ses:SARI_02584; }	{NA}	{NA}	{NA}	{NA}
X39GM000099	{kpa:KPNJ1_05690; }	{YP_004118623; COG2963 Transposase and inactivated derivatives X Mobilome: prophages, transposons;}	{GO:0006313; transposition, DNA-mediated; biological_process GO:0004803; transposase activity; molecular_function GO:0003677; DNA binding; molecular_function GO:0015074; DNA integration; biological_process}	{NA}	{NA}
X39GM000100	{ses:SARI_03075; K07497 K07497 putative transposase -- }	{YP_003614075; COG2801 Transposase InsO and inactivated derivatives X Mobilome: prophages, transposons;}	{GO:0015074; DNA integration; biological_process GO:0016791; phosphatase activity; molecular_function}	{NA}	{NA}
X39GM000101	{kpm:KPHS_p101140; }	{NA}	{GO:0016032; NA}	{NA}	{NA}
X39GM000102	{kpm:KPHS_p101130; }	{NA}	{NA}	{NA}	{NA}
X39GM000103	{kpx:PMK1_b00116; K01153 hsdR type I restriction enzyme, R subunit 3.1.21.3 }	{NP_931497; COG0610 Type I site-specific restriction-modification system, R (restriction) subunit and related helicases ... V Defense mechanisms ;}	{GO:0005524; ATP binding; molecular_function GO:0003676; nucleic acid binding; molecular_function GO:0008026; ATP-dependent helicase activity; molecular_function GO:0006304; DNA modification; biological_process GO:0004519; endonuclease activity; molecular_function GO:0016787; hydrolase activity; molecular_function GO:0003677; DNA binding; molecular_function}	{NA}	{NA}
X39GM000104	{kmi:VW41_20725; K01154 hsdS type I restriction enzyme, S subunit 3.1.21.3 }	{YP_004345798; COG0732 Restriction endonuclease S subunit V Defense mechanisms ;}	{GO:0003677; DNA binding; molecular_function GO:0006304; DNA modification; biological_process}	{NA}	{NA}
X39GM000105	{kpm:KPHS_p101080; K03427 hsdM type I restriction enzyme M protein 2.1.1.72 }	{NP_931494; COG0286 Type I restriction-modification system, DNA methylase subunit V Defense mechanisms ;}	{GO:0008168; methyltransferase activity; molecular_function GO:0008170; N-methyltransferase activity; molecular_function GO:0003677; DNA binding; molecular_function GO:0006306; DNA methylation; biological_process GO:0003824; NA GO:0009007; site-specific DNA-methyltransferase (adenine-specific) activity; molecular_function GO:0006304; DNA modification; biological_process}	{NA}	{NA}
X39GM000106	{seec:CFSAN002050_04945; }	{YP_006765237; COG1479 Uncharacterized conserved protein, contains ParB-like and HNH nuclease domains S Function unknown ;}	{NA}	{NA}	{NA}
X39GM000108	{cwe:CO701_02000; K07481 K07481 transposase, IS5 family -- }	{NP_414793; COG3039 Transposase and inactivated derivatives, IS5 family X Mobilome: prophages, transposons;}	{GO:0006313; transposition, DNA-mediated; biological_process GO:0004803; transposase activity; molecular_function GO:0003677; DNA binding; molecular_function}	{NA}	{NA}
X39GM000111	{kpu:KP1_p244; }	{NA}	{GO:0020037; heme binding; molecular_function GO:0009055; NA GO:0005506; iron ion binding; molecular_function}	{NA}	{NA}
X39GM000114	{NA}	{NA}	{NA}	{NA}	{NA}
X39GM000115	{koe:A225_NDM1p0150; K07481 K07481 transposase, IS5 family -- }	{NP_414793; COG3039 Transposase and inactivated derivatives, IS5 family X Mobilome: prophages, transposons;}	{GO:0003677; DNA binding; molecular_function GO:0004803; transposase activity; molecular_function GO:0006313; transposition, DNA-mediated; biological_process}	{NA}	{NA}
X39GM000116	{NA}	{NA}	{NA}	{NA}	{NA}
X39GM000120	{kpe:KPK_A0002; }	{NA}	{NA}	{NA}	{NA}
X39GM000127	{kpv:KPNIH29_26895; K07497 K07497 putative transposase -- }	{NP_414895; COG2801 Transposase InsO and inactivated derivatives X Mobilome: prophages, transposons;}	{GO:0015074; DNA integration; biological_process}	{NA}	{NA}
X39GM000128	{kpo:KPN2242_25971; K07483 K07483 transposase -- }	{YP_004847210; COG2963 Transposase and inactivated derivatives X Mobilome: prophages, transposons;}	{NA}	{NA}	{NA}
X39GM000129	{kpo:KPN2242_25976; K07486 K07486 transposase -- }	{YP_455161; COG3547 Transposase X Mobilome: prophages, transposons;}	{GO:0030001; metal ion transport; biological_process GO:0016272; prefoldin complex; cellular_component GO:0046873; metal ion transmembrane transporter activity; molecular_function GO:0006313; transposition, DNA-mediated; biological_process GO:0003677; DNA binding; molecular_function GO:0055085; transmembrane transport; biological_process GO:0051082; unfolded protein binding; molecular_function GO…	{NA}	{NA}
X39GM000130	{NA}	{NA}	{NA}	{NA}	{NA}
X39GM000132	{cwe:CO701_02320; }	{NA}	{GO:0007165; signal transduction; biological_process GO:0005524; ATP binding; molecular_function GO:0003774; motor activity; molecular_function GO:0005643; nuclear pore; cellular_component GO:0006606; protein import into nucleus; biological_process GO:0005634; nucleus; cellular_component GO:0006434; seryl-tRNA aminoacylation; biological_process GO:0004871; signal transducer activity; molecular_fu…	{NA}	{NA}
X39GM000133	{cwe:CO701_02315; }	{NA}	{GO:0008241; peptidyl-dipeptidase activity; molecular_function GO:0016491; oxidoreductase activity; molecular_function GO:0006508; proteolysis; biological_process GO:0003729; mRNA binding; molecular_function GO:0004334; fumarylacetoacetase activity; molecular_function GO:0005685; U1 snRNP; cellular_component GO:0008855; exodeoxyribonuclease VII activity; molecular_function GO:0010508; positive re…	{NA}	{NA}
X39GM000134	{cwe:CO701_02310; K05792 terA tellurite resistance protein TerA -- }	{YP_002235841; COG4110 Uncharacterized protein involved in tellurium resistance V Defense mechanisms ;}	{NA}	{NA}	{NA}
X39GM000135	{cwe:CO701_02305; }	{NA}	{NA}	{NA}	{NA}
X39GM000136	{NA}	{NA}	{NA}	{NA}	{NA}
X39GM000137	{cwe:CO701_02300; }	{YP_002802259; COG4457 Uncharacterized protein S Function unknown ;}	{NA}	{NA}	{NA}
X39GM000138	{cwe:CO701_02295; }	{YP_002802257; COG4458 Uncharacterized protein S Function unknown ;}	{GO:0005198; NA}	{VFG015298; CVF534 P_ syringae TTSS effectors hopL1 type III effector HopL1 - - - -}	{NA}
X39GM000139	{cwe:CO701_02290; }	{NA}	{NA}	{NA}	{NA}
X39GM000140	{cwe:CO701_02285; }	{YP_002802255; COG2304 Secreted protein containing bacterial Ig-like domain and vWFA domain R General function prediction only ;}	{GO:0055114; oxidation-reduction process; biological_process GO:0004096; catalase activity; molecular_function GO:0020037; heme binding; molecular_function}	{VFG015389; CVF535 Hcp secretion island-1 encoded type VI secretion system (H-T6SS) ppkA von Willebrand factor, type A - - - -}	{NA}
X39GM000141	{cwe:CO701_02280; K02003 ABC.CD.A putative ABC transport system ATP-binding protein -- }	{YP_002802253; COG1136 ABC-type lipoprotein export system, ATPase component M Cell wall/membrane/envelope biogenesis ;}	{GO:0003723; RNA binding; molecular_function GO:0003724; RNA helicase activity; molecular_function GO:0016020; membrane; cellular_component GO:0016301; kinase activity; molecular_function GO:0003924; GTPase activity; molecular_function GO:0016887; ATPase activity; molecular_function GO:0016817; hydrolase activity, acting on acid anhydrides; molecular_function GO:0043531; ADP binding; molecular_fu…	{VFG015381; CVF535 Hcp secretion island-1 encoded type VI secretion system (H-T6SS) PSPTO_2875 ABC transporter, ATP-binding protein - - - -}	{NA}
X39GM000142	{cwe:CO701_02275; K02004 ABC.CD.P putative ABC transport system permease protein -- }	{YP_002802252; COG0577 ABC-type antimicrobial peptide transport system, permease component V Defense mechanisms ;}	{GO:0016020; membrane; cellular_component}	{VFG015375; CVF535 Hcp secretion island-1 encoded type VI secretion system (H-T6SS) Psyr_2627 Protein of unknown function DUF214 - - - -}	{NA}
X39GM000143	{NA}	{NA}	{NA}	{NA}	{NA}
X39GM000144	{koe:A225_NDM1p0150; K07481 K07481 transposase, IS5 family -- }	{NP_414793; COG3039 Transposase and inactivated derivatives, IS5 family X Mobilome: prophages, transposons;}	{GO:0006313; transposition, DNA-mediated; biological_process GO:0004803; transposase activity; molecular_function GO:0003677; DNA binding; molecular_function}	{NA}	{NA}
X39GM000145	{sec:SCH_155; }	{NA}	{NA}	{NA}	{NA}
X39GM000146	{cwe:CO701_02265; }	{NA}	{NA}	{NA}	{NA}
X39GM000147	{kpu:KP1_p203; K07484 K07484 transposase -- }	{NA}	{GO:0010508; positive regulation of autophagy; biological_process GO:0005783; endoplasmic reticulum; cellular_component GO:0042729; DASH complex; cellular_component GO:0008855; exodeoxyribonuclease VII activity; molecular_function GO:0042025; host cell nucleus; cellular_component GO:0016021; integral to membrane; cellular_component GO:0005876; spindle microtubule; cellular_component GO:0006886; i…	{NA}	{NA}
X39GM000148	{koc:AB185_11220; K07484 K07484 transposase -- }	{NP_309365; COG3436 Transposase X Mobilome: prophages, transposons;}	{NA}	{NA}	{NA}
X39GM000149	{kpo:KPN2242_26001; }	{NA}	{NA}	{NA}	{NA}
X39GM000153	{kpu:KP1_p192; }	{NA}	{GO:0006310; DNA recombination; biological_process GO:0003677; DNA binding; molecular_function GO:0015074; DNA integration; biological_process}	{NA}	{NA}
X39GM000154	{kpu:KP1_p190; }	{NA}	{GO:0006310; DNA recombination; biological_process GO:0003677; DNA binding; molecular_function GO:0015074; DNA integration; biological_process}	{NA}	{NA}
X39GM000155	{kpu:KP1_p186; }	{NA}	{NA}	{NA}	{NA}
X39GM000156	{kpe:KPK_A0016; K07497 K07497 putative transposase -- }	{YP_002235668; COG2801 Transposase InsO and inactivated derivatives X Mobilome: prophages, transposons;}	{GO:0015074; DNA integration; biological_process}	{NA}	{NA}
X39GM000157	{kpe:KPK_A0015; K07497 K07497 putative transposase -- }	{YP_002235741; COG2963 Transposase and inactivated derivatives X Mobilome: prophages, transposons;}	{GO:0000150; recombinase activity; molecular_function GO:0006313; transposition, DNA-mediated; biological_process GO:0003677; DNA binding; molecular_function GO:0007049; cell cycle; biological_process GO:0005524; ATP binding; molecular_function GO:0004803; transposase activity; molecular_function GO:0006310; DNA recombination; biological_process GO:0003700; sequence-specific DNA binding transcrip…	{VFG014114; CVF520 LPS O-antigen (P_ aeruginosa) PA3144 hypothetical protein - - - -}	{NA}
X39GM000158	{csj:CSK29544_03253; }	{NA}	{NA}	{NA}	{NA}
X39GM000160	{ecv:APECO1_4213; K19160 yafO mRNA interferase YafO 3.1.-.- }	{NA}	{NA}	{NA}	{NA}
X39GM000161	{NA}	{NA}	{GO:0008774; acetaldehyde dehydrogenase (acetylating) activity; molecular_function GO:0055114; oxidation-reduction process; biological_process GO:0019439; aromatic compound catabolic process; biological_process GO:0015969; guanosine tetraphosphate metabolic process; biological_process}	{NA}	{NA}
X39GM000169	{kpo:KPN2242_15285; K07497 K07497 putative transposase -- }	{YP_004214998; COG2801 Transposase InsO and inactivated derivatives X Mobilome: prophages, transposons;}	{GO:0015074; DNA integration; biological_process}	{VFG014116; CVF520 LPS O-antigen (P_ aeruginosa) PA3142 hypothetical protein - - - -}	{NA}
X39GM000170	{kpx:PMK1_ndm00108; }	{NA}	{NA}	{NA}	{NA}
X39GM000171	{kpz:KPNIH27_28845; K07480 insB insertion element IS1 protein InsB -- }	{NP_309399; COG1662 Transposase and inactivated derivatives, IS1 family X Mobilome: prophages, transposons;}	{GO:0004803; transposase activity; molecular_function GO:0006313; transposition, DNA-mediated; biological_process GO:0003677; DNA binding; molecular_function}	{NA}	{NA}
X39GM000173	{NA}	{NA}	{NA}	{NA}	{NA}
X39GM000174	{eclz:LI64_23240; K07484 K07484 transposase -- }	{NA}	{GO:0042025; host cell nucleus; cellular_component GO:0007049; cell cycle; biological_process GO:0031514; motile cilium; cellular_component GO:0048870; cell motility; biological_process GO:0006914; autophagy; biological_process GO:0008855; exodeoxyribonuclease VII activity; molecular_function GO:0019072; viral genome packaging; biological_process}	{NA}	{NA}
X39GM000175	{kpv:KPNIH29_02990; K07484 K07484 transposase -- }	{NP_308356; COG3436 Transposase X Mobilome: prophages, transposons;}	{NA}	{NA}	{NA}
X39GM000176	{kpv:KPNIH29_27520; K07483 K07483 transposase -- }	{NP_308355; COG2963 Transposase and inactivated derivatives X Mobilome: prophages, transposons;}	{GO:0004803; transposase activity; molecular_function GO:0006313; transposition, DNA-mediated; biological_process GO:0003677; DNA binding; molecular_function}	{NA}	{NA}
X39GM000177	{kpu:KP1_p121; }	{NP_309591; COG2801 Transposase InsO and inactivated derivatives X Mobilome: prophages, transposons;}	{GO:0015074; DNA integration; biological_process}	{NA}	{NA}
X39GM000178	{kpv:KPNIH29_27530; K19166 higB mRNA interferase HigB 3.1.-.- }	{YP_001454601; COG4680 mRNA-degrading endonuclease (mRNA interferase) HigB, toxic component of the HigAB toxin-antitoxin module J Translation, ribosomal structure and biogenesis ;}	{GO:0016788; hydrolase activity, acting on ester bonds; molecular_function}	{NA}	{NA}
X39GM000179	{kpu:KP1_p122; K18831 higA HTH-type transcriptional regulator / antitoxin HigA -- }	{YP_001454600; COG5499 Antitoxin component HigA of the HigAB toxin-antitoxin module, contains an N-terminal HTH domain V Defense mechanisms ;}	{GO:0043565; sequence-specific DNA binding; molecular_function}	{NA}	{NA}
X39GM000181	{kpb:FH42_25740; K07480 insB insertion element IS1 protein InsB -- }	{NP_309399; COG1662 Transposase and inactivated derivatives, IS1 family X Mobilome: prophages, transposons;}	{GO:0003677; DNA binding; molecular_function GO:0006313; transposition, DNA-mediated; biological_process GO:0004803; transposase activity; molecular_function}	{NA}	{NA}
X39GM000183	{NA}	{NA}	{NA}	{NA}	{NA}
X39GM000184	{pam:PANA_2416; K00135 gabD succinate-semialdehyde dehydrogenase / glutarate-semialdehyde dehydrogenase 1.2.1.16 1.2.1.79 1.2.1.20 Metabolism; Amino acid metabolism; Alanine, aspartate and glutamate metabolism [PATH:ko00250] Metabolism; Amino acid metabolism; Lysine degradation [PATH:ko00310] Metabolism; Amino acid metabolism; Tyrosine metabolism [PATH:ko00350] Metabolism; Carbohydrate metabolism…	{YP_004116345; COG1012 Acyl-CoA reductase or other NAD-dependent aldehyde dehydrogenase C Energy production and conversion ;}	{GO:0055114; oxidation-reduction process; biological_process GO:0008152; NA GO:0016491; oxidoreductase activity; molecular_function}	{NA}	{NA}
X39GM000185	{pam:PANA_2415; K00128 ALDH aldehyde dehydrogenase (NAD+) 1.2.1.3 Metabolism; Carbohydrate metabolism; Glycolysis / Gluconeogenesis [PATH:ko00010] Metabolism; Carbohydrate metabolism; Ascorbate and aldarate metabolism [PATH:ko00053] Metabolism; Lipid metabolism; Fatty acid degradation [PATH:ko00071] Metabolism; Amino acid metabolism; Valine, leucine and isoleucine degradation [PATH:ko00280] Metab…	{YP_004116344; COG1012 Acyl-CoA reductase or other NAD-dependent aldehyde dehydrogenase C Energy production and conversion ;}	{GO:0055114; oxidation-reduction process; biological_process GO:0008152; NA GO:0005524; ATP binding; molecular_function GO:0016879; ligase activity, forming carbon-nitrogen bonds; molecular_function GO:0008033; tRNA processing; biological_process GO:0000166; nucleotide binding; molecular_function GO:0016491; oxidoreductase activity; molecular_function GO:0005737; cytoplasm; cellular_component}	{NA}	{NA}
X39GM000186	{pao:Pat9b_2486; K01560 E3.8.1.2 2-haloacid dehalogenase 3.8.1.2 Metabolism; Xenobiotics biodegradation and metabolism; Chlorocyclohexane and chlorobenzene degradation [PATH:ko00361] Metabolism; Xenobiotics biodegradation and metabolism; Chloroalkane and chloroalkene degradation [PATH:ko00625] }	{YP_004116343; COG1011 FMN phosphatase YigB, HAD superfamily H Coenzyme transport and metabolism ;}	{NA}	{NA}	{NA}
X39GM000187	{pao:Pat9b_2485; }	{YP_004116342; COG0665 Glycine/D-amino acid oxidase (deaminating) E Amino acid transport and metabolism ;}	{GO:0016117; carotenoid biosynthetic process; biological_process GO:0016491; oxidoreductase activity; molecular_function GO:0008033; tRNA processing; biological_process GO:0016705; oxidoreductase activity, acting on paired donors, with incorporation or reduction of molecular oxygen; molecular_function GO:0055114; oxidation-reduction process; biological_process GO:0051287; NAD binding; molecular_f…	{NA}	{NA}
X39GM000188	{pao:Pat9b_2484; K02035 ABC.PE.S peptide/nickel transport system substrate-binding protein -- Cellular Processes; Cellular community - prokaryotes; Quorum sensing [PATH:ko02024] }	{YP_004116341; COG0747 ABC-type transport system, periplasmic component E Amino acid transport and metabolism ;}	{GO:0006810; transport; biological_process GO:0005215; NA}	{NA}	{NA}
X39GM000189	{pva:Pvag_1884; K02033 ABC.PE.P peptide/nickel transport system permease protein -- Cellular Processes; Cellular community - prokaryotes; Quorum sensing [PATH:ko02024] }	{YP_004116340; COG0601 ABC-type dipeptide/oligopeptide/nickel transport system, permease component EP Amino acid transport and metabolism ; Inorganic ion transport and metabolism ;}	{GO:0006810; transport; biological_process GO:0005215; NA GO:0016020; membrane; cellular_component}	{NA}	{NA}
X39GM000190	{pagc:BEE12_00060; K02034 ABC.PE.P1 peptide/nickel transport system permease protein -- Cellular Processes; Cellular community - prokaryotes; Quorum sensing [PATH:ko02024] }	{YP_004116339; COG1173 ABC-type dipeptide/oligopeptide/nickel transport system, permease component EP Amino acid transport and metabolism ; Inorganic ion transport and metabolism ;}	{GO:0016020; membrane; cellular_component GO:0006810; transport; biological_process GO:0005215; NA}	{NA}	{NA}
X39GM000191	{pao:Pat9b_2481; K02031 ABC.PE.A peptide/nickel transport system ATP-binding protein -- Cellular Processes; Cellular community - prokaryotes; Quorum sensing [PATH:ko02024] }	{YP_004116338; COG4172 ABC-type microcin C transport system, duplicated ATPase component YejF Q Secondary metabolites biosynthesis, transport and catabolism ;}	{GO:0004672; protein kinase activity; molecular_function GO:0004020; adenylylsulfate kinase activity; molecular_function GO:0005622; intracellular; cellular_component GO:0016787; hydrolase activity; molecular_function GO:0016887; ATPase activity; molecular_function GO:0016851; magnesium chelatase activity; molecular_function GO:0003924; GTPase activity; molecular_function GO:0008134; transcriptio…	{NA}	{NA}
X39GM000192	{pva:Pvag_1881; }	{YP_004116337; COG0665 Glycine/D-amino acid oxidase (deaminating) E Amino acid transport and metabolism ;}	{GO:0055114; oxidation-reduction process; biological_process GO:0016705; oxidoreductase activity, acting on paired donors, with incorporation or reduction of molecular oxygen; molecular_function GO:0008677; 2-dehydropantoate 2-reductase activity; molecular_function GO:0050660; flavin adenine dinucleotide binding; molecular_function GO:0008033; tRNA processing; biological_process GO:0016491; oxido…	{NA}	{NA}
X39GM000193	{ced:LH89_04270; }	{YP_004116336; COG0456 Ribosomal protein S18 acetylase RimI and related acetyltransferases J Translation, ribosomal structure and biogenesis ;}	{GO:0016747; transferase activity, transferring acyl groups other than amino-acyl groups; molecular_function GO:0008080; N-acetyltransferase activity; molecular_function}	{NA}	{NA}
X39GM000194	{pva:Pvag_1879; K12972 ghrA glyoxylate/hydroxypyruvatereductase 1.1.1.79 1.1.1.81 Metabolism; Amino acid metabolism; Glycine, serine and threonine metabolism [PATH:ko00260] Metabolism; Carbohydrate metabolism; Pyruvate metabolism [PATH:ko00620] Metabolism; Carbohydrate metabolism; Glyoxylate and dicarboxylate metabolism [PATH:ko00630] }	{YP_004116335; COG0111 Phosphoglycerate dehydrogenase or related dehydrogenase HR Coenzyme transport and metabolism ; General function prediction only ;}	{GO:0016616; oxidoreductase activity, acting on the CH-OH group of donors, NAD or NADP as acceptor; molecular_function GO:0004616; phosphogluconate dehydrogenase (decarboxylating) activity; molecular_function GO:0055114; oxidation-reduction process; biological_process GO:0006098; pentose-phosphate shunt; biological_process GO:0048037; cofactor binding; molecular_function}	{NA}	{NA}
X39GM000195	{paj:PAJ_1707; }	{YP_004116334; COG1473 Metal-dependent amidase/aminoacylase/carboxypeptidase R General function prediction only ;}	{GO:0016787; hydrolase activity; molecular_function GO:0008152; NA}	{NA}	{NA}
X39GM000196	{pagc:BEE12_00030; K07250 gabT 4-aminobutyrate aminotransferase / (S)-3-amino-2-methylpropionate transaminase 2.6.1.19 2.6.1.22 Metabolism; Amino acid metabolism; Alanine, aspartate and glutamate metabolism [PATH:ko00250] Metabolism; Amino acid metabolism; Valine, leucine and isoleucine degradation [PATH:ko00280] Metabolism; Metabolism of other amino acids; beta-Alanine metabolism [PATH:ko00410] …	{YP_004116333; COG0160 4-aminobutyrate aminotransferase or related aminotransferase E Amino acid transport and metabolism ;}	{GO:0030170; pyridoxal phosphate binding; molecular_function GO:0008483; transaminase activity; molecular_function GO:0009058; biosynthetic process; biological_process}	{NA}	{NA}
X39GM000197	{ebi:EbC_28250; }	{YP_004116332; COG1522 DNA-binding transcriptional regulator, Lrp family K Transcription ;}	{GO:0005622; intracellular; cellular_component GO:0003700; sequence-specific DNA binding transcription factor activity; molecular_function GO:0006355; regulation of transcription, DNA-dependent; biological_process GO:0043565; sequence-specific DNA binding; molecular_function}	{NA}	{NA}
X39GM000198	{NA}	{NA}	{GO:0043565; sequence-specific DNA binding; molecular_function GO:0006355; regulation of transcription, DNA-dependent; biological_process GO:0003700; sequence-specific DNA binding transcription factor activity; molecular_function}	{NA}	{NA}
X39GM000201	{kpv:KPNIH29_27105; }	{YP_003602604; COG3415 Transposase X Mobilome: prophages, transposons;}	{GO:0006313; transposition, DNA-mediated; biological_process GO:0003677; DNA binding; molecular_function GO:0005524; ATP binding; molecular_function GO:0004803; transposase activity; molecular_function GO:0003700; sequence-specific DNA binding transcription factor activity; molecular_function GO:0015074; DNA integration; biological_process GO:0019825; oxygen binding; molecular_function GO:0019069…	{NA}	{NA}
X39GM000202	{kpv:KPNIH29_27110; K06218 relE, stbE mRNA interferase RelE/StbE -- }	{NP_460510; COG2026 mRNA-degrading endonuclease RelE, toxin component of the RelBE toxin-antitoxin system V Defense mechanisms ;}	{NA}	{NA}	{NA}
X39GM000203	{kpv:KPNIH29_27115; K18923 stbD antitoxin StbD -- }	{NP_460511; COG2161 Antitoxin component YafN of the YafNO toxin-antitoxin module, PHD/YefM family V Defense mechanisms ;}	{NA}	{NA}	{NA}
X39GM000204	{kom:HR38_29510; }	{YP_003199643; COG3547 Transposase X Mobilome: prophages, transposons;}	{GO:0004803; transposase activity; molecular_function GO:0006313; transposition, DNA-mediated; biological_process GO:0003677; DNA binding; molecular_function}	{NA}	{NA}
X39GM000205	{koc:AB185_04510; K07497 K07497 putative transposase -- }	{YP_003602763; COG2801 Transposase InsO and inactivated derivatives X Mobilome: prophages, transposons;}	{GO:0005521; lamin binding; molecular_function GO:0015074; DNA integration; biological_process GO:0043066; negative regulation of apoptosis; biological_process}	{NA}	{NA}
X39GM000206	{kqu:AVR78_26855; }	{YP_006766944; COG1484 DNA replication protein DnaC L Replication, recombination and repair ;}	{GO:0005524; ATP binding; molecular_function}	{NA}	{NA}
X39GM000207	{NA}	{NA}	{NA}	{NA}	{NA}
X39GM000209	{NA}	{NA}	{NA}	{NA}	{NA}
X39GM000212	{NA}	{NA}	{NA}	{NA}	{NA}
X39GM000214	{kqu:AVR78_26885; K21086 yhjH c-di-GMP phosphodiesterase 3.1.4.52 Cellular Processes; Cellular community - prokaryotes; Biofilm formation - Escherichia coli [PATH:ko02026] }	{YP_001452549; COG2200 EAL domain, c-di-GMP-specific phosphodiesterase class I (or its enzymatically inactive variant) T Signal transduction mechanisms ;}	{NA}	{NA}	{NA}
X39GM000217	{psu:Psesu_1757; K01676 E4.2.1.2A, fumA, fumB fumarate hydratase, class I 4.2.1.2 }	{YP_001913369; COG1951 Tartrate dehydratase alpha subunit/Fumarate hydratase class I, N-terminal domain C Energy production and conversion ;}	{GO:0016836; hydro-lyase activity; molecular_function GO:0016829; lyase activity; molecular_function}	{NA}	{NA}
X39GM000218	{mpo:Mpop_1257; }	{YP_001532768; COG1012 Acyl-CoA reductase or other NAD-dependent aldehyde dehydrogenase C Energy production and conversion ;}	{GO:0055114; oxidation-reduction process; biological_process GO:0008218; bioluminescence; biological_process GO:0008152; NA GO:0003995; acyl-CoA dehydrogenase activity; molecular_function GO:0016491; oxidoreductase activity; molecular_function}	{NA}	{NA}
X39GM000220	{mpo:Mpop_1252; K00059 fabG 3-oxoacyl-[acyl-carrier protein] reductase 1.1.1.100 }	{YP_002496360; COG1028 NAD(P)-dependent dehydrogenase, short-chain alcohol dehydrogenase family IQR Lipid transport and metabolism ; Secondary metabolites biosynthesis, transport and catabolism ; General function prediction only ;}	{GO:0008152; NA GO:0003824; NA GO:0050662; coenzyme binding; molecular_function GO:0044237; cellular metabolic process; biological_process GO:0016491; oxidoreductase activity; molecular_function}	{NA}	{NA}
X39GM000221	{mpo:Mpop_1251; K00128 ALDH aldehyde dehydrogenase (NAD+) 1.2.1.3 Metabolism; Carbohydrate metabolism; Glycolysis / Gluconeogenesis [PATH:ko00010] Metabolism; Carbohydrate metabolism; Ascorbate and aldarate metabolism [PATH:ko00053] Metabolism; Lipid metabolism; Fatty acid degradation [PATH:ko00071] Metabolism; Amino acid metabolism; Valine, leucine and isoleucine degradation [PATH:ko00280] Metab…	{YP_003982105; COG1012 Acyl-CoA reductase or other NAD-dependent aldehyde dehydrogenase C Energy production and conversion ;}	{GO:0055114; oxidation-reduction process; biological_process GO:0008152; NA GO:0016491; oxidoreductase activity; molecular_function}	{NA}	{NA}
X39GM000222	{ngl:RG1141_PB00400; }	{NA}	{GO:0005198; NA GO:0019028; viral capsid; cellular_component}	{NA}	{NA}
X39GM000223	{NA}	{NA}	{NA}	{NA}	{NA}
X39GM000224	{kpm:KPHS_p400010; }	{NA}	{GO:0000746; conjugation; biological_process}	{NA}	{NA}
X39GM000225	{ecoj:P423_25155; }	{NA}	{GO:0009291; unidirectional conjugation; biological_process}	{NA}	{NA}
X39GM000226	{abh:M3Q_1517; K18320 IS15, IS26 transposase, IS6 family -- }	{YP_003711070; COG3316 Transposase (or an inactivated derivative) X Mobilome: prophages, transposons;}	{GO:0004803; transposase activity; molecular_function GO:0033014; tetrapyrrole biosynthetic process; biological_process GO:0015074; DNA integration; biological_process GO:0004852; uroporphyrinogen-III synthase activity; molecular_function GO:0006313; transposition, DNA-mediated; biological_process GO:0003677; DNA binding; molecular_function GO:0019028; viral capsid; cellular_component GO:0005198;…	{NA}	{NA}
X39GM000227	{kpx:PMK1_ndm00060; }	{NA}	{NA}	{NA}	{NA}
X39GM000228	{NA}	{NA}	{GO:0006313; transposition, DNA-mediated; biological_process GO:0004803; transposase activity; molecular_function}	{NA}	{NA}
X39GM000229	{NA}	{NA}	{NA}	{NA}	{NA}
X39GM000230	{NA}	{NA}	{GO:0004803; transposase activity; molecular_function GO:0006313; transposition, DNA-mediated; biological_process}	{NA}	{NA}
X39GM000231	{NA}	{NA}	{GO:0004803; transposase activity; molecular_function GO:0006313; transposition, DNA-mediated; biological_process}	{NA}	{NA}
X39GM000232	{NA}	{NA}	{GO:0004803; transposase activity; molecular_function GO:0006313; transposition, DNA-mediated; biological_process}	{NA}	{NA}
X39GM000233	{caf:AL524_00065; K03496 parA, soj chromosome partitioning protein -- }	{NA}	{NA}	{NA}	{NA}
X39GM000234	{NA}	{NA}	{NA}	{NA}	{NA}
X39GM000235	{NA}	{NA}	{NA}	{NA}	{NA}
X39GM000236	{NA}	{NA}	{NA}	{NA}	{NA}
X39GM000237	{NA}	{NA}	{NA}	{NA}	{NA}
X39GM000238	{NA}	{NA}	{NA}	{NA}	{NA}
X39GM000239	{NA}	{NA}	{NA}	{NA}	{NA}
X39GM000240	{NA}	{NA}	{NA}	{NA}	{NA}
X39GM000241	{NA}	{NA}	{NA}	{NA}	{NA}
X39GM000242	{NA}	{NA}	{NA}	{NA}	{NA}
X39GM000243	{NA}	{NA}	{NA}	{NA}	{NA}
X39GM000244	{NA}	{NA}	{NA}	{NA}	{NA}
X39GM000245	{NA}	{NA}	{NA}	{NA}	{NA}
X39GM000246	{NA}	{NA}	{NA}	{NA}	{NA}
X39GM000247	{NA}	{NA}	{NA}	{NA}	{NA}
X39GM000248	{NA}	{NA}	{NA}	{NA}	{NA}
X39GM000249	{NA}	{NA}	{GO:0005524; ATP binding; molecular_function GO:0006355; regulation of transcription, DNA-dependent; biological_process GO:0016887; ATPase activity; molecular_function GO:0008134; transcription factor binding; molecular_function}	{NA}	{NA}
X39GM000250	{ecf:ECH74115_A0040; }	{NA}	{NA}	{NA}	{NA}
X39GM000251	{NA}	{NA}	{NA}	{NA}	{NA}
X39GM000252	{NA}	{NA}	{NA}	{NA}	{NA}
X39GM000253	{ehm:AB284_00230; }	{NA}	{NA}	{NA}	{NA}
X39GM000254	{NA}	{NA}	{NA}	{NA}	{NA}
X39GM000255	{NA}	{NA}	{NA}	{NA}	{NA}
X39GM000256	{NA}	{NA}	{NA}	{NA}	{NA}
X39GM000257	{NA}	{NA}	{NA}	{NA}	{NA}
X39GM000258	{caf:AL524_00110; }	{YP_001812505; COG2214 Curved DNA-binding protein CbpA, contains a DnaJ-like domain K Transcription ;}	{NA}	{NA}	{NA}
X39GM000259	{NA}	{NA}	{GO:0003910; DNA ligase (ATP) activity; molecular_function}	{NA}	{NA}
X39GM000260	{NA}	{NA}	{NA}	{NA}	{NA}
X39GM000261	{NA}	{NA}	{NA}	{NA}	{NA}
X39GM000262	{rpi:Rpic_3450; K01153 hsdR type I restriction enzyme, R subunit 3.1.21.3 }	{NA}	{NA}	{NA}	{NA}
X39GM000263	{NA}	{NA}	{NA}	{NA}	{NA}
X39GM000264	{NA}	{NA}	{NA}	{NA}	{NA}
X39GM000265	{NA}	{NA}	{NA}	{NA}	{NA}
X39GM000266	{NA}	{NA}	{GO:0005524; ATP binding; molecular_function GO:0003677; DNA binding; molecular_function GO:0016787; hydrolase activity; molecular_function}	{NA}	{NA}
X39GM000267	{NA}	{NP_484553; COG0610 Type I site-specific restriction-modification system, R (restriction) subunit and related helicases ... V Defense mechanisms ;}	{GO:0003677; DNA binding; molecular_function GO:0006304; DNA modification; biological_process GO:0004519; endonuclease activity; molecular_function}	{NA}	{NA}
X39GM000268	{NA}	{NA}	{GO:0006304; DNA modification; biological_process GO:0004519; endonuclease activity; molecular_function GO:0003677; DNA binding; molecular_function}	{NA}	{NA}
X39GM000269	{NA}	{NA}	{NA}	{NA}	{NA}
X39GM000270	{kpx:PMK1_b00117; K01154 hsdS type I restriction enzyme, S subunit 3.1.21.3 }	{YP_005376770; COG0732 Restriction endonuclease S subunit V Defense mechanisms ;}	{GO:0003677; DNA binding; molecular_function GO:0006304; DNA modification; biological_process}	{NA}	{NA}
X39GM000271	{NA}	{NA}	{GO:0005102; receptor binding; molecular_function GO:0008170; N-methyltransferase activity; molecular_function GO:0005577; fibrinogen complex; cellular_component GO:0030168; platelet activation; biological_process GO:0006306; DNA methylation; biological_process GO:0003677; DNA binding; molecular_function GO:0007165; signal transduction; biological_process GO:0051258; protein polymerization; biolo…	{NA}	{NA}
X39GM000272	{NA}	{NA}	{GO:0008168; methyltransferase activity; molecular_function GO:0006306; DNA methylation; biological_process GO:0008170; N-methyltransferase activity; molecular_function GO:0003677; DNA binding; molecular_function}	{NA}	{NA}
X39GM000273	{NA}	{NA}	{NA}	{NA}	{NA}
X39GM000274	{NA}	{NA}	{GO:0006306; DNA methylation; biological_process GO:0008170; N-methyltransferase activity; molecular_function GO:0003677; DNA binding; molecular_function GO:0009007; site-specific DNA-methyltransferase (adenine-specific) activity; molecular_function}	{NA}	{NA}
X39GM000275	{caf:AL524_00095; }	{NA}	{GO:0006270; DNA-dependent DNA replication initiation; biological_process GO:0005727; extrachromosomal circular DNA; cellular_component GO:0003887; DNA-directed DNA polymerase activity; molecular_function}	{NA}	{NA}
X39GM000276	{NA}	{NA}	{NA}	{NA}	{NA}
X39GM000277	{NA}	{NA}	{GO:0003916; DNA topoisomerase activity; molecular_function GO:0006412; translation; biological_process GO:0016151; nickel ion binding; molecular_function GO:0006265; DNA topological change; biological_process GO:0003677; DNA binding; molecular_function GO:0005840; ribosome; cellular_component GO:0006464; protein modification process; biological_process GO:0005622; intracellular; cellular_compone…	{NA}	{NA}
X39GM000278	{NA}	{NA}	{GO:0006265; DNA topological change; biological_process GO:0003677; DNA binding; molecular_function GO:0003916; DNA topoisomerase activity; molecular_function}	{NA}	{NA}
X39GM000279	{NA}	{NA}	{GO:0003677; DNA binding; molecular_function GO:0006265; DNA topological change; biological_process GO:0003916; DNA topoisomerase activity; molecular_function}	{NA}	{NA}
X39GM000280	{NA}	{NA}	{NA}	{NA}	{NA}
X39GM000281	{NA}	{NA}	{NA}	{NA}	{NA}
X39GM000282	{NA}	{NA}	{NA}	{NA}	{NA}
X39GM000283	{NA}	{NA}	{NA}	{NA}	{NA}
X39GM000284	{NA}	{NA}	{NA}	{NA}	{NA}
X39GM000285	{NA}	{NA}	{GO:0005524; ATP binding; molecular_function}	{NA}	{NA}
X39GM000286	{NA}	{NA}	{NA}	{NA}	{NA}
X39GM000287	{NA}	{NA}	{NA}	{NA}	{NA}
X39GM000288	{NA}	{NA}	{NA}	{NA}	{NA}
X39GM000289	{NA}	{NA}	{GO:0015031; protein transport; biological_process GO:0000145; exocyst; cellular_component GO:0019028; viral capsid; cellular_component GO:0006904; vesicle docking involved in exocytosis; biological_process}	{NA}	{NA}
X39GM000290	{NA}	{NA}	{NA}	{NA}	{NA}
X39GM000291	{NA}	{NA}	{NA}	{NA}	{NA}
X39GM000292	{NA}	{NA}	{GO:0030255; protein secretion by the type IV secretion system; biological_process GO:0009306; protein secretion; biological_process GO:0009405; pathogenesis; biological_process GO:0016020; membrane; cellular_component}	{NA}	{NA}
X39GM000293	{NA}	{NA}	{GO:0008233; peptidase activity; molecular_function GO:0006465; signal peptide processing; biological_process GO:0030255; protein secretion by the type IV secretion system; biological_process GO:0005787; signal peptidase complex; cellular_component GO:0016021; integral to membrane; cellular_component}	{NA}	{NA}
X39GM000294	{NA}	{NA}	{NA}	{NA}	{NA}
X39GM000295	{NA}	{NA}	{GO:0006189; 'de novo' IMP biosynthetic process; biological_process GO:0016020; membrane; cellular_component}	{NA}	{NA}
X39GM000296	{NA}	{NA}	{GO:0016020; membrane; cellular_component}	{NA}	{NA}
X39GM000297	{ecoh:ECRM13516_5610; K03204 virB9, lvhB9 type IV secretion system protein VirB9 -- Environmental Information Processing; Membrane transport; Bacterial secretion system [PATH:ko03070] }	{NA}	{NA}	{NA}	{NA}
X39GM000298	{NA}	{NA}	{GO:0016021; integral to membrane; cellular_component GO:0022857; transmembrane transporter activity; molecular_function GO:0055085; transmembrane transport; biological_process}	{NA}	{NA}
X39GM000299	{NA}	{NA}	{NA}	{NA}	{NA}
X39GM000300	{NA}	{NA}	{NA}	{NA}	{NA}
X39GM000301	{NA}	{NA}	{NA}	{NA}	{NA}
X39GM000302	{NA}	{NA}	{GO:0031683; G-protein beta/gamma-subunit complex binding; molecular_function GO:0016773; phosphotransferase activity, alcohol group as acceptor; molecular_function GO:0015995; chlorophyll biosynthetic process; biological_process GO:0007264; small GTPase mediated signal transduction; biological_process GO:0007186; G-protein coupled receptor protein signaling pathway; biological_process GO:0070526…	{NA}	{NA}
X39GM000303	{NA}	{NA}	{GO:0006810; transport; biological_process GO:0005524; ATP binding; molecular_function}	{NA}	{NA}
X39GM000304	{NA}	{NA}	{GO:0016020; membrane; cellular_component GO:0003824; NA}	{NA}	{NA}
X39GM000305	{NA}	{NA}	{NA}	{NA}	{NA}
X39GM000306	{NA}	{NA}	{GO:0016020; membrane; cellular_component GO:0009291; unidirectional conjugation; biological_process}	{NA}	{NA}
X39GM000307	{NA}	{NA}	{GO:0009291; unidirectional conjugation; biological_process GO:0016020; membrane; cellular_component}	{NA}	{NA}
X39GM000308	{NA}	{NA}	{GO:0016020; membrane; cellular_component GO:0009291; unidirectional conjugation; biological_process}	{NA}	{NA}
X39GM000309	{NA}	{NA}	{GO:0009291; unidirectional conjugation; biological_process GO:0016020; membrane; cellular_component}	{NA}	{NA}
X39GM000310	{NA}	{NA}	{GO:0005634; nucleus; cellular_component GO:0051726; regulation of cell cycle; biological_process GO:0006355; regulation of transcription, DNA-dependent; biological_process GO:0003677; DNA binding; molecular_function GO:0005622; intracellular; cellular_component GO:0009279; cell outer membrane; cellular_component GO:0051087; chaperone binding; molecular_function}	{NA}	{NA}
X39GM000311	{NA}	{NA}	{NA}	{NA}	{NA}
X39GM000312	{pstw:DSJ_22890; }	{NP_052628; COG0582 Integrase LX Replication, recombination and repair ; Mobilome: prophages, transposons;}	{GO:0006310; DNA recombination; biological_process GO:0003677; DNA binding; molecular_function GO:0015074; DNA integration; biological_process}	{NA}	{NA}
X39GM000313	{NA}	{NA}	{GO:0016020; membrane; cellular_component GO:0004871; signal transducer activity; molecular_function GO:0007165; signal transduction; biological_process}	{NA}	{NA}
X39GM000314	{NA}	{NA}	{NA}	{NA}	{NA}
X39GM000315	{ete:ETEE_p1012; }	{YP_006912048; COG3385 IS4 transposase X Mobilome: prophages, transposons;}	{GO:0004803; transposase activity; molecular_function GO:0006313; transposition, DNA-mediated; biological_process GO:0003677; DNA binding; molecular_function}	{NA}	{NA}
X39GM000316	{NA}	{NA}	{NA}	{NA}	{NA}
X39GM000317	{ete:ETEE_p1010; }	{YP_004265613; COG0426 Flavorubredoxin C Energy production and conversion ;}	{GO:0016787; hydrolase activity; molecular_function}	{NA}	{NA}
X39GM000318	{axx:ERS451415_05782; }	{YP_003278557; COG1961 Site-specific DNA recombinase related to the DNA invertase Pin L Replication, recombination and repair ;}	{GO:0043565; sequence-specific DNA binding; molecular_function GO:0000150; recombinase activity; molecular_function GO:0003677; DNA binding; molecular_function GO:0006310; DNA recombination; biological_process}	{NA}	{NA}
X39GM000319	{NA}	{YP_003711072; COG3316 Transposase (or an inactivated derivative) X Mobilome: prophages, transposons;}	{NA}	{NA}	{NA}
X39GM000320	{caf:AL524_00335; K18320 IS15, IS26 transposase, IS6 family -- }	{YP_007547190; COG3316 Transposase (or an inactivated derivative) X Mobilome: prophages, transposons;}	{GO:0004803; transposase activity; molecular_function GO:0033014; tetrapyrrole biosynthetic process; biological_process GO:0004852; uroporphyrinogen-III synthase activity; molecular_function GO:0015074; DNA integration; biological_process GO:0006313; transposition, DNA-mediated; biological_process GO:0003677; DNA binding; molecular_function GO:0019028; viral capsid; cellular_component GO:0005198;…	{NA}	{NA}
X39GM000321	{ete:ETEE_p2001; }	{NA}	{NA}	{NA}	{NA}
X39GM000322	{cfar:CI104_26930; K19271 catA chloramphenicol O-acetyltransferase type A 2.3.1.28 }	{YP_007506298; COG4845 Chloramphenicol O-acetyltransferase V Defense mechanisms ;}	{GO:0016747; transferase activity, transferring acyl groups other than amino-acyl groups; molecular_function GO:0008152; NA GO:0016746; transferase activity, transferring acyl groups; molecular_function GO:0008811; chloramphenicol O-acetyltransferase activity; molecular_function}	{NA}	{ardb_1605; cata2 90 -- chloramphenicol cata Group A chloramphenicol acetyltransferase, which can inactivate chloramphenicol.}
X39GM000323	{cdi:DIP1948; K18974 sul1 dihydropteroate synthase type 1 2.5.1.15 Metabolism; Metabolism of cofactors and vitamins; Folate biosynthesis [PATH:ko00790] }	{NA}	{GO:0042558; pteridine-containing compound metabolic process; biological_process}	{NA}	{NA}
X39GM000324	{eum:ECUMN_4821; K18975 ebr, qacEdelta1 small multidrug resistance pump -- }	{YP_001144147; COG2076 Multidrug transporter EmrE and related cation transporters V Defense mechanisms ;}	{GO:0016021; integral to membrane; cellular_component}	{NA}	{NA}
X39GM000325	{kpb:FH42_26820; K00984 aadA streptomycin 3"-adenylyltransferase 2.7.7.47 }	{YP_004111328; COG1708 Predicted nucleotidyltransferase R General function prediction only ;}	{NA}	{NA}	{NA}
X39GM000326	{kpb:FH42_26825; K18589 dfrA1, dhfr dihydrofolate reductase (trimethoprim resistance protein) 1.5.1.3 Metabolism; Metabolism of cofactors and vitamins; One carbon pool by folate [PATH:ko00670] Metabolism; Metabolism of cofactors and vitamins; Folate biosynthesis [PATH:ko00790] }	{YP_064047; COG0262 Dihydrofolate reductase H Coenzyme transport and metabolism ;}	{GO:0006545; glycine biosynthetic process; biological_process GO:0009165; nucleotide biosynthetic process; biological_process GO:0055114; oxidation-reduction process; biological_process GO:0004146; dihydrofolate reductase activity; molecular_function}	{NA}	{NA}
X39GM000327	{NA}	{NA}	{GO:0006545; glycine biosynthetic process; biological_process GO:0009165; nucleotide biosynthetic process; biological_process GO:0055114; oxidation-reduction process; biological_process GO:0004146; dihydrofolate reductase activity; molecular_function}	{NA}	{NA}
X39GM000328	{aby:ABAYE3621; K21288 arr2 rifampin ADP-ribosylating transferase -- }	{NA}	{NA}	{NA}	{NA}
X39GM000329	{NA}	{NA}	{NA}	{NA}	{NA}
X39GM000330	{rhp:LPB142_15550; K19278 aac6-Ib aminoglycoside 6'-N-acetyltransferase Ib 2.3.1.82 }	{NA}	{GO:0008080; N-acetyltransferase activity; molecular_function}	{NA}	{NA}
X39GM000331	{eun:pUMNK88_129; }	{YP_001144151; COG4974 Site-specific recombinase XerD L Replication, recombination and repair ;}	{GO:0015074; DNA integration; biological_process GO:0006310; DNA recombination; biological_process GO:0003677; DNA binding; molecular_function}	{NA}	{NA}
X39GM000332	{NA}	{NA}	{NA}	{NA}	{NA}
X39GM000333	{cfd:CFNIH1_25075; }	{NA}	{GO:0003887; DNA-directed DNA polymerase activity; molecular_function GO:0005727; extrachromosomal circular DNA; cellular_component GO:0006270; DNA-dependent DNA replication initiation; biological_process}	{NA}	{NA}
X39GM000334	{cfar:CI104_25765; }	{NA}	{NA}	{NA}	{NA}
X39GM000335	{kin:AB182_03150; }	{YP_007590225; COG3091 Predicted Zn-dependent metalloprotease, SprT family R General function prediction only ;}	{GO:0008270; zinc ion binding; molecular_function GO:0008237; metallopeptidase activity; molecular_function}	{NA}	{NA}
X39GM000336	{NA}	{NA}	{GO:0006281; DNA repair; biological_process GO:0003684; damaged DNA binding; molecular_function GO:0003887; DNA-directed DNA polymerase activity; molecular_function}	{NA}	{NA}
X39GM000337	{NA}	{NA}	{GO:0016779; nucleotidyltransferase activity; molecular_function}	{NA}	{NA}
X39GM000338	{NA}	{NA}	{GO:0006281; DNA repair; biological_process GO:0003887; DNA-directed DNA polymerase activity; molecular_function GO:0003684; damaged DNA binding; molecular_function}	{NA}	{NA}
X39GM000339	{cfd:CFNIH1_25055; K03503 umuD DNA polymerase V 3.4.21.- }	{YP_003540597; COG1974 SOS-response transcriptional repressor LexA (RecA-mediated autopeptidase) KT Transcription ; Signal transduction mechanisms ;}	{NA}	{NA}	{NA}
X39GM000340	{cfd:CFNIH1_25050; }	{NA}	{NA}	{NA}	{NA}
X39GM000341	{kpz:KPNIH27_25770; }	{NA}	{GO:0006412; translation; biological_process GO:0019843; rRNA binding; molecular_function GO:0005840; ribosome; cellular_component GO:0003735; structural constituent of ribosome; molecular_function}	{NA}	{NA}
X39GM000342	{ecla:ECNIH3_24315; }	{NA}	{NA}	{NA}	{NA}
X39GM000343	{kpv:KPNIH29_26725; }	{NA}	{NA}	{NA}	{NA}
X39GM000344	{kpv:KPNIH29_26720; }	{NA}	{NA}	{NA}	{NA}
X39GM000345	{kpv:KPNIH29_26715; }	{NA}	{NA}	{NA}	{NA}
X39GM000346	{ecla:ECNIH3_24290; }	{YP_004215765; COG4734 Antirestriction protein V Defense mechanisms ;}	{NA}	{NA}	{NA}
X39GM000347	{NA}	{NA}	{NA}	{NA}	{NA}
X39GM000348	{kpv:KPNIH29_26695; }	{NA}	{NA}	{NA}	{NA}
X39GM000349	{cfd:CFNIH1_25020; }	{NA}	{GO:0016872; intramolecular lyase activity; molecular_function GO:0016020; membrane; cellular_component GO:0009405; pathogenesis; biological_process}	{NA}	{NA}
X39GM000350	{cfd:CFNIH1_25015; }	{NA}	{NA}	{NA}	{NA}
X39GM000351	{kpv:KPNIH29_26680; }	{NA}	{NA}	{NA}	{NA}
X39GM000352	{NA}	{NA}	{NA}	{NA}	{NA}
X39GM000353	{NA}	{NA}	{NA}	{NA}	{NA}
X39GM000354	{NA}	{NA}	{GO:0015940; pantothenate biosynthetic process; biological_process GO:0003864; 3-methyl-2-oxobutanoate hydroxymethyltransferase activity; molecular_function}	{NA}	{NA}
X39GM000355	{NA}	{NA}	{GO:0016020; membrane; cellular_component GO:0009291; unidirectional conjugation; biological_process}	{NA}	{NA}
X39GM000356	{NA}	{NA}	{NA}	{NA}	{NA}
X39GM000357	{NA}	{NA}	{GO:0003677; DNA binding; molecular_function GO:0005622; intracellular; cellular_component GO:0003723; RNA binding; molecular_function GO:0006355; regulation of transcription, DNA-dependent; biological_process GO:0033897; ribonuclease T2 activity; molecular_function}	{NA}	{NA}
X39GM000358	{NA}	{NA}	{GO:0006571; tyrosine biosynthetic process; biological_process GO:0055114; oxidation-reduction process; biological_process GO:0004665; prephenate dehydrogenase (NADP+) activity; molecular_function GO:0006281; DNA repair; biological_process GO:0000723; telomere maintenance; biological_process GO:0051085; chaperone mediated protein folding requiring cofactor; biological_process GO:0005524; ATP bind…	{NA}	{NA}
X39GM000359	{NA}	{NA}	{NA}	{NA}	{NA}
X39GM000360	{NA}	{NA}	{NA}	{NA}	{NA}
X39GM000361	{NA}	{NA}	{NA}	{NA}	{NA}
X39GM000362	{NA}	{NA}	{NA}	{NA}	{NA}
X39GM000363	{mup:A0256_24455; }	{NA}	{NA}	{NA}	{NA}
X39GM000364	{NA}	{NA}	{GO:0016021; integral to membrane; cellular_component GO:0055085; transmembrane transport; biological_process}	{NA}	{NA}
X39GM000365	{NA}	{NA}	{NA}	{NA}	{NA}
X39GM000366	{sbj:CF168_21260; K18476 tetR TetR/AcrR family transcriptional regulator, tetracycline repressor protein DBLINKS COG: COG1309 GENES EOI: ECO111_p1-106 ECV: APECO1_O1R84(tetR) ECM: EcSMS35_A0152(tetR) ECY: ECSE_P1-0010 ECK: EC55989_4857 EUM: p1ECUMN_0055(tetR) ELO: EC042_4110(tetR) ELN: NRG857_30068(tetR) ESM: O3M_00395 ESL: O3K_00385 EBD: ECBD_0326 EUN: pUMNK88_41(tetR) ECOO: ECRM13514_5835(tetR)…	{YP_003979661; COG1309 DNA-binding transcriptional regulator, AcrR family K Transcription ;}	{GO:0003677; DNA binding; molecular_function GO:0045892; negative regulation of transcription, DNA-dependent; biological_process}	{NA}	{NA}
X39GM000367	{NA}	{NA}	{GO:0003735; structural constituent of ribosome; molecular_function GO:0005622; intracellular; cellular_component GO:0005840; ribosome; cellular_component GO:0006412; translation; biological_process GO:0045892; negative regulation of transcription, DNA-dependent; biological_process}	{NA}	{NA}
X39GM000368	{kpw:KPNIH30_27070; }	{NA}	{NA}	{NA}	{NA}
X39GM000369	{ecli:ECNIH5_23445; }	{NA}	{NA}	{NA}	{NA}
X39GM000370	{eclz:LI64_22120; }	{YP_003540668; COG1502 Phosphatidylserine/phosphatidylglycerophosphate/cardiolipin synthase or related enzyme I Lipid transport and metabolism ;}	{GO:0008152; NA GO:0003824; NA}	{NA}	{NA}
X39GM000371	{NA}	{NA}	{NA}	{NA}	{NA}
X39GM000372	{NA}	{NA}	{GO:0016817; hydrolase activity, acting on acid anhydrides; molecular_function GO:0003968; RNA-directed RNA polymerase activity; molecular_function GO:0004197; cysteine-type endopeptidase activity; molecular_function GO:0006810; transport; biological_process GO:0005524; ATP binding; molecular_function GO:0070008; serine-type exopeptidase activity; molecular_function GO:0017111; nucleoside-triphos…	{NA}	{NA}
X39GM000373	{ecla:ECNIH3_24180; K03196 virB11, lvhB11 type IV secretion system protein VirB11 -- Environmental Information Processing; Membrane transport; Bacterial secretion system [PATH:ko03070] Human Diseases; Infectious diseases; Epithelial cell signaling in Helicobacter pylori infection [PATH:ko05120] }	{NA}	{GO:0006810; transport; biological_process GO:0005524; ATP binding; molecular_function}	{NA}	{NA}
X39GM000374	{NA}	{NA}	{NA}	{NA}	{NA}
X39GM000375	{ecla:ECNIH3_24175; K03195 virB10, lvhB10 type IV secretion system protein VirB10 -- Environmental Information Processing; Membrane transport; Bacterial secretion system [PATH:ko03070] }	{NA}	{GO:0006811; ion transport; biological_process GO:0016020; membrane; cellular_component}	{NA}	{NA}
X39GM000376	{NA}	{NA}	{NA}	{NA}	{NA}
X39GM000377	{ecla:ECNIH3_24170; K03204 virB9, lvhB9 type IV secretion system protein VirB9 -- Environmental Information Processing; Membrane transport; Bacterial secretion system [PATH:ko03070] }	{NA}	{NA}	{NA}	{NA}
X39GM000378	{ecla:ECNIH3_24165; K03203 virB8, lvhB8 type IV secretion system protein VirB8 -- Environmental Information Processing; Membrane transport; Bacterial secretion system [PATH:ko03070] }	{NA}	{GO:0016020; membrane; cellular_component}	{NA}	{NA}
X39GM000379	{ecla:ECNIH3_24160; K03201 virB6, lvhB6 type IV secretion system protein VirB6 -- Environmental Information Processing; Membrane transport; Bacterial secretion system [PATH:ko03070] }	{NA}	{GO:0030255; protein secretion by the type IV secretion system; biological_process}	{NA}	{NA}
X39GM000380	{NA}	{NA}	{NA}	{NA}	{NA}
X39GM000381	{kpv:KPNIH29_26525; }	{NA}	{NA}	{NA}	{NA}
X39GM000382	{NA}	{NA}	{NA}	{NA}	{NA}
X39GM000383	{ecla:ECNIH3_24150; K03200 virB5, lvhB5 type IV secretion system protein VirB5 -- Environmental Information Processing; Membrane transport; Bacterial secretion system [PATH:ko03070] }	{NA}	{GO:0072686; mitotic spindle; cellular_component GO:0005737; cytoplasm; cellular_component GO:0019028; viral capsid; cellular_component GO:0030269; tetrahydromethanopterin S-methyltransferase activity; molecular_function GO:0007067; mitosis; biological_process GO:0016021; integral to membrane; cellular_component GO:0019478; D-amino acid catabolic process; biological_process GO:0016788; hydrolase …	{NA}	{NA}
X39GM000384	{NA}	{NA}	{NA}	{NA}	{NA}
X39GM000385	{NA}	{NA}	{NA}	{NA}	{NA}
X39GM000386	{NA}	{NA}	{NA}	{NA}	{NA}
X39GM000387	{NA}	{NA}	{GO:0005524; ATP binding; molecular_function}	{NA}	{NA}
X39GM000388	{NA}	{NA}	{NA}	{NA}	{NA}
X39GM000389	{NA}	{NA}	{NA}	{NA}	{NA}
X39GM000390	{kpv:KPNIH29_26510; K03198 virB3, lvhB3 type IV secretion system protein VirB3 -- Environmental Information Processing; Membrane transport; Bacterial secretion system [PATH:ko03070] }	{NA}	{NA}	{NA}	{NA}
X39GM000391	{ecla:ECNIH3_24135; }	{NA}	{NA}	{NA}	{NA}
X39GM000392	{ecla:ECNIH3_24130; }	{NA}	{NA}	{NA}	{NA}
X39GM000393	{NA}	{NA}	{NA}	{NA}	{NA}
X39GM000394	{ecla:ECNIH3_24115; }	{NA}	{NA}	{NA}	{NA}
X39GM000395	{ecla:ECNIH3_24110; }	{NA}	{NA}	{NA}	{NA}
X39GM000396	{NA}	{NA}	{NA}	{NA}	{NA}
X39GM000397	{kok:KONIH1_31525; K07448 mrr restriction system protein -- }	{YP_001812488; COG1715 Restriction endonuclease Mrr V Defense mechanisms ;}	{GO:0009307; DNA restriction-modification system; biological_process GO:0004519; endonuclease activity; molecular_function GO:0003677; DNA binding; molecular_function}	{NA}	{NA}
X39GM000398	{NA}	{YP_008848992; COG1662 Transposase and inactivated derivatives, IS1 family X Mobilome: prophages, transposons;}	{GO:0003677; DNA binding; molecular_function GO:0006313; transposition, DNA-mediated; biological_process GO:0004803; transposase activity; molecular_function}	{NA}	{NA}
X39GM000399	{srz:AXX16_0047; K00558 DNMT1, dcm DNA (cytosine-5)-methyltransferase 1 2.1.1.37 Metabolism; Amino acid metabolism; Cysteine and methionine metabolism [PATH:ko00270] Human Diseases; Cancers; MicroRNAs in cancer [PATH:ko05206] }	{YP_001454986; COG0270 Site-specific DNA-cytosine methylase L Replication, recombination and repair ;}	{GO:0006306; DNA methylation; biological_process GO:0003677; DNA binding; molecular_function GO:0008168; methyltransferase activity; molecular_function}	{NA}	{NA}
X39GM000400	{NA}	{NA}	{NA}	{NA}	{NA}
X39GM000401	{NA}	{NA}	{GO:0008168; methyltransferase activity; molecular_function GO:0003677; DNA binding; molecular_function GO:0006306; DNA methylation; biological_process}	{NA}	{NA}
X39GM000402	{NA}	{NA}	{NA}	{NA}	{NA}
X39GM000403	{NA}	{NA}	{NA}	{NA}	{NA}
X39GM000404	{aaj:BOQ57_11360; }	{YP_001260088; COG3316 Transposase (or an inactivated derivative) X Mobilome: prophages, transposons;}	{GO:0015074; DNA integration; biological_process}	{NA}	{NA}
X39GM000405	{din:Selin_0009; }	{NA}	{NA}	{NA}	{NA}
X39GM000406	{aby:ABAYE3610; }	{NA}	{NA}	{NA}	{NA}
X39GM000407	{kpn:KPN_pKPN6p09258; }	{NA}	{NA}	{NA}	{NA}
X39GM000408	{NA}	{NA}	{NA}	{NA}	{NA}
X39GM000409	{NA}	{NA}	{NA}	{NA}	{NA}
X39GM000410	{kco:BWI95_19695; }	{NA}	{NA}	{NA}	{NA}
X39GM000411	{elh:ETEC_p58_0006; }	{NP_861554; COG2197 DNA-binding response regulator, NarL/FixJ family, contains REC and HTH domains TK Signal transduction mechanisms ; Transcription ;}	{NA}	{NA}	{NA}
X39GM000412	{NA}	{NA}	{NA}	{NA}	{NA}
X39GM000413	{elh:ETEC_p58_0007; }	{YP_002923952; COG2944 DNA-binding transcriptional regulator YiaG, XRE-type HTH domain K Transcription ;}	{GO:0006352; transcription initiation, DNA-dependent; biological_process GO:0003700; sequence-specific DNA binding transcription factor activity; molecular_function GO:0003677; DNA binding; molecular_function GO:0016987; sigma factor activity; molecular_function GO:0006355; regulation of transcription, DNA-dependent; biological_process GO:0043565; sequence-specific DNA binding; molecular_function}	{NA}	{NA}
X39GM000415	{NA}	{NA}	{GO:0008565; protein transporter activity; molecular_function GO:0005737; cytoplasm; cellular_component GO:0016592; mediator complex; cellular_component GO:0006357; regulation of transcription from RNA polymerase II promoter; biological_process GO:0006886; intracellular protein transport; biological_process GO:0001104; RNA polymerase II transcription cofactor activity; molecular_function GO:00009…	{NA}	{NA}
X39GM000416	{NA}	{NA}	{NA}	{NA}	{NA}
X39GM000417	{erj:EJP617_13780; }	{NA}	{NA}	{NA}	{NA}
X39GM000418	{epr:EPYR_00188; }	{NA}	{NA}	{NA}	{NA}
X39GM000419	{kpx:PMK1_b00047; }	{NA}	{GO:0017004; cytochrome complex assembly; biological_process GO:0015886; heme transport; biological_process GO:0016021; integral to membrane; cellular_component GO:0008121; ubiquinol-cytochrome-c reductase activity; molecular_function}	{NA}	{NA}
X39GM000420	{cdn:BN940_02841; }	{NA}	{NA}	{NA}	{NA}
X39GM000421	{NA}	{NA}	{NA}	{NA}	{NA}
X39GM000422	{kpm:KPHS_p100570; }	{NA}	{NA}	{NA}	{NA}
X39GM000423	{NA}	{NA}	{NA}	{NA}	{NA}
X39GM000425	{kpx:PMK1_b00043; }	{NA}	{GO:0006869; lipid transport; biological_process GO:0005576; NA GO:0008855; exodeoxyribonuclease VII activity; molecular_function GO:0008289; lipid binding; molecular_function GO:0005515; protein binding; molecular_function GO:0042157; lipoprotein metabolic process; biological_process}	{NA}	{NA}
X39GM000426	{kpx:PMK1_b00042; }	{NP_395343; COG4723 Phage-related protein, tail component X Mobilome: prophages, transposons;}	{NA}	{NA}	{NA}
X39GM000427	{kpm:KPHS_p100630; }	{NP_395344; COG1310 Proteasome lid subunit RPN8/RPN11, contains Jab1/MPN domain metalloenzyme (JAMM) motif O Posttranslational modification, protein turnover, chaperones ;}	{NA}	{NA}	{NA}
X39GM000428	{kpx:PMK1_b00040; }	{NP_395345; COG4672 Phage-related protein X Mobilome: prophages, transposons;}	{NA}	{NA}	{NA}
X39GM000429	{kpx:PMK1_b00039; }	{NP_395346; COG4718 Phage-related protein X Mobilome: prophages, transposons;}	{NA}	{NA}	{NA}
X39GM000430	{kpx:PMK1_b00038; }	{NP_395347; COG3941 Phage tail tape-measure protein, controls tail length X Mobilome: prophages, transposons;}	{GO:0005198; NA GO:0001539; ciliary or flagellar motility; biological_process GO:0009288; bacterial-type flagellum; cellular_component}	{NA}	{NA}
X39GM000431	{kpx:PMK1_b00037; }	{NA}	{NA}	{NA}	{NA}
X39GM000432	{kpm:KPHS_p100690; }	{NA}	{NA}	{NA}	{NA}
X39GM000433	{kpm:KPHS_p100700; }	{NP_395350; COG5492 Uncharacterized conserved protein YjdB, contains Ig-like domain R General function prediction only ;}	{NA}	{NA}	{NA}
X39GM000434	{kpx:PMK1_b00034; }	{NA}	{NA}	{NA}	{NA}
X39GM000435	{kpx:PMK1_b00033; }	{NA}	{NA}	{NA}	{NA}
X39GM000436	{kpm:KPHS_p100730; }	{NA}	{NA}	{NA}	{NA}
X39GM000437	{kpx:PMK1_b00031; }	{NA}	{NA}	{NA}	{NA}
X39GM000438	{kpx:PMK1_b00030; }	{NA}	{NA}	{NA}	{NA}
X39GM000439	{kpx:PMK1_b00029; }	{NP_395356; COG5492 Uncharacterized conserved protein YjdB, contains Ig-like domain R General function prediction only ;}	{NA}	{NA}	{NA}
X39GM000440	{kpm:KPHS_p100780; }	{NA}	{NA}	{NA}	{NA}
X39GM000441	{kpm:KPHS_p100790; }	{NA}	{GO:0008537; proteasome activator complex; cellular_component GO:0010508; positive regulation of autophagy; biological_process}	{NA}	{NA}
X39GM000442	{kpx:PMK1_b00026; }	{NA}	{NA}	{NA}	{NA}
X39GM000443	{kpm:KPHS_p100820; }	{NP_395360; COG1783 Phage terminase large subunit X Mobilome: prophages, transposons;}	{GO:0006323; DNA packaging; biological_process}	{NA}	{NA}
X39GM000444	{kpm:KPHS_p100830; }	{NA}	{GO:0046961; proton-transporting ATPase activity, rotational mechanism; molecular_function GO:0003677; DNA binding; molecular_function GO:0000275; mitochondrial proton-transporting ATP synthase complex, catalytic core F(1); cellular_component GO:0015986; ATP synthesis coupled proton transport; biological_process GO:0046933; hydrogen ion transporting ATP synthase activity, rotational mechanism; mo…	{NA}	{NA}
X39GM000445	{kpm:KPHS_p100840; }	{NA}	{GO:0006508; proteolysis; biological_process GO:0004252; serine-type endopeptidase activity; molecular_function}	{NA}	{NA}
X39GM000446	{kpm:KPHS_p100850; K07128 K07128 uncharacterized protein -- }	{NP_395363; COG2401 ABC-type ATPase fused to a predicted acetyltransferase domain R General function prediction only ;}	{NA}	{NA}	{NA}
X39GM000447	{kpx:PMK1_b00021; }	{NA}	{NA}	{NA}	{NA}
X39GM000448	{ypa:YPA_MT0030; K07128 K07128 uncharacterized protein -- }	{NP_395365; COG2401 ABC-type ATPase fused to a predicted acetyltransferase domain R General function prediction only ;}	{GO:0031683; G-protein beta/gamma-subunit complex binding; molecular_function GO:0000103; sulfate assimilation; biological_process GO:0007186; G-protein coupled receptor protein signaling pathway; biological_process GO:0006355; regulation of transcription, DNA-dependent; biological_process GO:0019001; guanyl nucleotide binding; molecular_function GO:0043531; ADP binding; molecular_function GO:000…	{NA}	{NA}
X39GM000449	{kpm:KPHS_p100890; }	{NP_395366; COG1475 Chromosome segregation protein Spo0J, contains ParB-like nuclease domain D Cell cycle control, cell division, chromosome partitioning ;}	{NA}	{NA}	{NA}
X39GM000450	{kpm:KPHS_p100900; }	{NP_395367; COG1475 Chromosome segregation protein Spo0J, contains ParB-like nuclease domain D Cell cycle control, cell division, chromosome partitioning ;}	{NA}	{NA}	{NA}
X39GM000451	{kpm:KPHS_p100910; }	{NP_395368; COG1061 Superfamily II DNA or RNA helicase KL Transcription ; Replication, recombination and repair ;}	{GO:0003676; nucleic acid binding; molecular_function GO:0008026; ATP-dependent helicase activity; molecular_function GO:0005524; ATP binding; molecular_function GO:0003677; DNA binding; molecular_function GO:0004386; helicase activity; molecular_function GO:0016787; hydrolase activity; molecular_function}	{NA}	{NA}
X39GM000452	{kpm:KPHS_p100920; }	{NA}	{NA}	{NA}	{NA}
X39GM000453	{esm:O3M_25599; }	{NA}	{GO:0003677; DNA binding; molecular_function}	{NA}	{NA}
X39GM000454	{NA}	{NA}	{NA}	{NA}	{NA}
X39GM000455	{kpm:KPHS_p100940; }	{NA}	{GO:0006355; regulation of transcription, DNA-dependent; biological_process GO:0006457; protein folding; biological_process GO:0003700; sequence-specific DNA binding transcription factor activity; molecular_function}	{NA}	{NA}
X39GM000456	{kpm:KPHS_p100960; }	{NA}	{NA}	{NA}	{NA}
X39GM000457	{kpm:KPHS_p100970; }	{NA}	{NA}	{NA}	{NA}
X39GM000458	{kpx:PMK1_b00009; }	{NA}	{NA}	{NA}	{NA}
X39GM000459	{kpx:PMK1_b00007; }	{NA}	{NA}	{NA}	{NA}
X39GM000460	{kpx:PMK1_b00006; }	{NA}	{NA}	{NA}	{NA}
X39GM000461	{kpm:KPHS_p101010; }	{NA}	{NA}	{NA}	{NA}
X39GM000462	{kpx:PMK1_b00004; }	{NA}	{NA}	{NA}	{NA}
X39GM000463	{kpm:KPHS_p101030; }	{NA}	{NA}	{NA}	{NA}
X39GM000464	{kpm:KPHS_p101040; }	{NA}	{NA}	{NA}	{NA}
X39GM000465	{seec:CFSAN002050_04945; }	{YP_006765237; COG1479 Uncharacterized conserved protein, contains ParB-like and HNH nuclease domains S Function unknown ;}	{NA}	{NA}	{NA}
X39GM000466	{kpx:PMK1_b00118; K03427 hsdM type I restriction enzyme M protein 2.1.1.72 }	{NP_931494; COG0286 Type I restriction-modification system, DNA methylase subunit V Defense mechanisms ;}	{GO:0008168; methyltransferase activity; molecular_function GO:0008170; N-methyltransferase activity; molecular_function GO:0003677; DNA binding; molecular_function GO:0006306; DNA methylation; biological_process GO:0009007; site-specific DNA-methyltransferase (adenine-specific) activity; molecular_function GO:0003824; NA GO:0006304; DNA modification; biological_process}	{NA}	{NA}
X39GM000467	{lef:LJPFL01_3586; K01154 hsdS type I restriction enzyme, S subunit 3.1.21.3 }	{YP_003318047; COG0732 Restriction endonuclease S subunit V Defense mechanisms ;}	{GO:0006304; DNA modification; biological_process GO:0003677; DNA binding; molecular_function}	{NA}	{NA}
X39GM000468	{kpx:PMK1_b00116; K01153 hsdR type I restriction enzyme, R subunit 3.1.21.3 }	{NP_931497; COG0610 Type I site-specific restriction-modification system, R (restriction) subunit and related helicases ... V Defense mechanisms ;}	{GO:0008026; ATP-dependent helicase activity; molecular_function GO:0003676; nucleic acid binding; molecular_function GO:0005524; ATP binding; molecular_function GO:0003677; DNA binding; molecular_function GO:0004519; endonuclease activity; molecular_function GO:0016787; hydrolase activity; molecular_function GO:0006304; DNA modification; biological_process}	{NA}	{NA}
X39GM000469	{kpm:KPHS_p101130; }	{NA}	{NA}	{NA}	{NA}
X39GM000470	{kpm:KPHS_p101140; }	{NA}	{GO:0016032; NA}	{NA}	{NA}
X39GM000471	{kpm:KPHS_p101150; }	{NA}	{NA}	{NA}	{NA}
X39GM000472	{kpx:PMK1_b00112; }	{YP_004212526; COG3793 Tellurite resistance protein P Inorganic ion transport and metabolism ;}	{GO:0006730; one-carbon metabolic process; biological_process GO:0016740; transferase activity; molecular_function}	{NA}	{NA}
X39GM000473	{NA}	{NA}	{NA}	{NA}	{NA}
X39GM000474	{NA}	{NA}	{NA}	{NA}	{NA}
X39GM000476	{NA}	{NA}	{NA}	{NA}	{NA}
X39GM000477	{kpx:PMK1_b00109; }	{NA}	{NA}	{NA}	{NA}
X39GM000478	{NA}	{NA}	{NA}	{NA}	{NA}
X39GM000479	{kpx:PMK1_b00108; }	{NA}	{GO:0003677; DNA binding; molecular_function GO:0032775; DNA methylation on adenine; biological_process GO:0009007; site-specific DNA-methyltransferase (adenine-specific) activity; molecular_function}	{NA}	{NA}
X39GM000480	{kpx:PMK1_b00107; }	{NA}	{GO:0019028; viral capsid; cellular_component}	{NA}	{NA}
X39GM000481	{NA}	{NA}	{NA}	{NA}	{NA}
X39GM000482	{kpx:PMK1_b00106; }	{YP_003976350; COG3597 Uncharacterized conserved protein, DUF697 family S Function unknown ;}	{GO:0016817; hydrolase activity, acting on acid anhydrides; molecular_function GO:0000166; nucleotide binding; molecular_function GO:0003677; DNA binding; molecular_function GO:0005524; ATP binding; molecular_function GO:0005525; GTP binding; molecular_function GO:0016021; integral to membrane; cellular_component GO:0007049; cell cycle; biological_process GO:0005622; intracellular; cellular_compo…	{NA}	{NA}
X39GM000483	{kpx:PMK1_b00105; K02342 dnaQ DNA polymerase III subunit epsilon 2.7.7.7 Metabolism; Nucleotide metabolism; Purine metabolism [PATH:ko00230] Metabolism; Nucleotide metabolism; Pyrimidine metabolism [PATH:ko00240] Genetic Information Processing; Replication and repair; DNA replication [PATH:ko03030] Genetic Information Processing; Replication and repair; Mismatch repair [PATH:ko03430] Genetic Info…	{NA}	{NA}	{NA}	{NA}
X39GM000484	{sty:HCM2.0115c; }	{NA}	{NA}	{NA}	{NA}
X39GM000485	{sty:HCM2.0116c; }	{NA}	{GO:0008152; NA GO:0016301; kinase activity; molecular_function GO:0016887; ATPase activity; molecular_function GO:0005524; ATP binding; molecular_function GO:0015937; coenzyme A biosynthetic process; biological_process GO:0004140; dephospho-CoA kinase activity; molecular_function}	{NA}	{NA}
X39GM000486	{kpm:KPHS_p101250; K00287 DHFR, folA dihydrofolate reductase 1.5.1.3 }	{YP_003683549; COG0262 Dihydrofolate reductase H Coenzyme transport and metabolism ;}	{GO:0004146; dihydrofolate reductase activity; molecular_function GO:0055114; oxidation-reduction process; biological_process GO:0009165; nucleotide biosynthetic process; biological_process GO:0006545; glycine biosynthetic process; biological_process}	{NA}	{NA}
X39GM000487	{kpx:PMK1_b00101; }	{NA}	{NA}	{NA}	{NA}
X39GM000488	{kpx:PMK1_b00100; K00560 thyA, TYMS thymidylate synthase 2.1.1.45 Metabolism; Nucleotide metabolism; Pyrimidine metabolism [PATH:ko00240] Metabolism; Metabolism of cofactors and vitamins; One carbon pool by folate [PATH:ko00670] Human Diseases; Drug resistance; Antifolate resistance [PATH:ko01523] }	{YP_008975287; COG0207 Thymidylate synthase F Nucleotide transport and metabolism ;}	{GO:0006231; dTMP biosynthetic process; biological_process GO:0004799; thymidylate synthase activity; molecular_function}	{NA}	{NA}
X39GM000489	{kpm:KPHS_p101280; }	{NA}	{NA}	{NA}	{NA}
X39GM000490	{kpm:KPHS_p101290; K00526 E1.17.4.1B, nrdB, nrdF ribonucleoside-diphosphate reductase beta chain 1.17.4.1 Metabolism; Nucleotide metabolism; Purine metabolism [PATH:ko00230] Metabolism; Nucleotide metabolism; Pyrimidine metabolism [PATH:ko00240] }	{YP_003713044; COG0208 Ribonucleotide reductase beta subunit, ferritin-like domain F Nucleotide transport and metabolism ;}	{GO:0055114; oxidation-reduction process; biological_process GO:0009186; deoxyribonucleoside diphosphate metabolic process; biological_process}	{NA}	{NA}
X39GM000492	{kpx:PMK1_b00096; }	{NA}	{GO:0004520; endodeoxyribonuclease activity; molecular_function GO:0006281; DNA repair; biological_process GO:0006310; DNA recombination; biological_process}	{NA}	{NA}
X39GM000493	{kpx:PMK1_b00095; }	{NA}	{NA}	{NA}	{NA}
X39GM000494	{kpx:PMK1_b00094; }	{NP_395379; COG0419 DNA repair exonuclease SbcCD ATPase subunit L Replication, recombination and repair ;}	{GO:0006914; autophagy; biological_process GO:0016020; membrane; cellular_component GO:0005643; nuclear pore; cellular_component GO:0005886; plasma membrane; cellular_component GO:0016887; ATPase activity; molecular_function GO:0006810; transport; biological_process GO:0005524; ATP binding; molecular_function GO:0017056; structural constituent of nuclear pore; molecular_function GO:0006886; intra…	{NA}	{NA}
X39GM000495	{kpm:KPHS_p101360; }	{NP_395381; COG0420 DNA repair exonuclease SbcCD nuclease subunit L Replication, recombination and repair ;}	{GO:0016787; hydrolase activity; molecular_function}	{NA}	{NA}
X39GM000496	{sty:HCM2.0129c; }	{NA}	{GO:0016747; transferase activity, transferring acyl groups other than amino-acyl groups; molecular_function GO:0008080; N-acetyltransferase activity; molecular_function}	{NA}	{NA}
X39GM000497	{kpm:KPHS_p101410; }	{NA}	{NA}	{NA}	{NA}
X39GM000498	{kpm:KPHS_p100010; }	{NA}	{GO:0003887; DNA-directed DNA polymerase activity; molecular_function GO:0005727; extrachromosomal circular DNA; cellular_component GO:0006270; DNA-dependent DNA replication initiation; biological_process}	{NA}	{NA}
X39GM000499	{kpm:KPHS_p100020; }	{NA}	{NA}	{NA}	{NA}
X39GM000500	{NA}	{NA}	{NA}	{NA}	{NA}
X39GM000501	{kpo:KPN2242_15285; K07497 K07497 putative transposase -- }	{YP_004214998; COG2801 Transposase InsO and inactivated derivatives X Mobilome: prophages, transposons;}	{GO:0015074; DNA integration; biological_process}	{VFG014116; CVF520 LPS O-antigen (P_ aeruginosa) PA3142 hypothetical protein - - - -}	{NA}
X39GM000502	{kpb:FH42_26665; }	{NA}	{NA}	{NA}	{NA}
X39GM000504	{pagg:AL522_20715; }	{NA}	{GO:0001104; RNA polymerase II transcription cofactor activity; molecular_function GO:0006357; regulation of transcription from RNA polymerase II promoter; biological_process GO:0016592; mediator complex; cellular_component}	{NA}	{NA}
X39GM000505	{kpx:PMK1_b00085; }	{NP_395394; COG0468 RecA/RadA recombinase L Replication, recombination and repair ;}	{GO:0006281; DNA repair; biological_process GO:0009432; SOS response; biological_process GO:0003697; single-stranded DNA binding; molecular_function GO:0005524; ATP binding; molecular_function}	{NA}	{NA}
X39GM000506	{kpx:PMK1_b00084; }	{NA}	{NA}	{NA}	{NA}
X39GM000507	{kpm:KPHS_p100070; }	{NP_395396; COG0258 5'-3' exonuclease L Replication, recombination and repair ;}	{GO:0003824; NA GO:0003677; DNA binding; molecular_function GO:0008409; 5'-3' exonuclease activity; molecular_function}	{NA}	{NA}
X39GM000508	{kpx:PMK1_b00082; }	{NA}	{NA}	{NA}	{NA}
X39GM000509	{kpm:KPHS_p100090; }	{NA}	{NA}	{NA}	{NA}
X39GM000511	{kpx:PMK1_b00078; }	{NA}	{NA}	{NA}	{NA}
X39GM000512	{kpx:PMK1_b00077; K02337 dnaE DNA polymerase III subunit alpha 2.7.7.7 Metabolism; Nucleotide metabolism; Purine metabolism [PATH:ko00230] Metabolism; Nucleotide metabolism; Pyrimidine metabolism [PATH:ko00240] Genetic Information Processing; Replication and repair; DNA replication [PATH:ko03030] Genetic Information Processing; Replication and repair; Mismatch repair [PATH:ko03430] Genetic Inform…	{NA}	{NA}	{NA}	{NA}
X39GM000513	{kpx:PMK1_b00076; }	{NA}	{GO:0043565; sequence-specific DNA binding; molecular_function GO:0016788; hydrolase activity, acting on ester bonds; molecular_function}	{NA}	{NA}
X39GM000514	{kpx:PMK1_b00075; K02337 dnaE DNA polymerase III subunit alpha 2.7.7.7 Metabolism; Nucleotide metabolism; Purine metabolism [PATH:ko00230] Metabolism; Nucleotide metabolism; Pyrimidine metabolism [PATH:ko00240] Genetic Information Processing; Replication and repair; DNA replication [PATH:ko03030] Genetic Information Processing; Replication and repair; Mismatch repair [PATH:ko03430] Genetic Inform…	{NA}	{GO:0003824; NA GO:0008408; 3'-5' exonuclease activity; molecular_function GO:0006260; DNA replication; biological_process}	{NA}	{NA}
X39GM000515	{kpx:PMK1_b00074; K09882 cobS cobaltochelatase CobS 6.6.1.2 Metabolism; Metabolism of cofactors and vitamins; Porphyrin and chlorophyll metabolism [PATH:ko00860] }	{NP_395435; COG0714 MoxR-like ATPase R General function prediction only ;}	{GO:0005524; ATP binding; molecular_function GO:0016887; ATPase activity; molecular_function}	{NA}	{NA}
X39GM000516	{kpm:KPHS_p100170; }	{NP_395434; COG4547 Cobalamin biosynthesis protein CobT (nicotinate-mononucleotide:5, 6-dimethylbenzimidazole phosphorib... H Coenzyme transport and metabolism ;}	{GO:0009236; cobalamin biosynthetic process; biological_process}	{NA}	{NA}
X39GM000517	{NA}	{NA}	{NA}	{NA}	{NA}
X39GM000518	{kpm:KPHS_p100180; }	{NA}	{NA}	{NA}	{NA}
X39GM000519	{kpm:KPHS_p100190; }	{NA}	{NA}	{NA}	{NA}
X39GM000520	{kpx:PMK1_b00070; }	{YP_004215268; COG0582 Integrase LX Replication, recombination and repair ; Mobilome: prophages, transposons;}	{GO:0015074; DNA integration; biological_process GO:0003677; DNA binding; molecular_function GO:0006310; DNA recombination; biological_process}	{NA}	{NA}
X39GM000521	{kpm:KPHS_p100220; K19160 yafO mRNA interferase YafO 3.1.-.- }	{NA}	{NA}	{NA}	{NA}
X39GM000522	{kpm:KPHS_p100230; }	{NA}	{NA}	{NA}	{NA}
X39GM000523	{kpm:KPHS_p100240; K03674 grxA glutaredoxin 1 -- }	{YP_001453817; COG0695 Glutaredoxin O Posttranslational modification, protein turnover, chaperones ;}	{GO:0045454; cell redox homeostasis; biological_process GO:0009055; NA GO:0015035; protein disulfide oxidoreductase activity; molecular_function}	{NA}	{NA}
X39GM000526	{eclx:LI66_23850; }	{NA}	{NA}	{NA}	{NA}
X39GM000527	{kpx:PMK1_b00061; }	{NA}	{NA}	{NA}	{NA}
X39GM000528	{kpx:PMK1_b00060; }	{NA}	{NA}	{NA}	{NA}
X39GM000529	{kpm:KPHS_p100420; }	{NA}	{NA}	{NA}	{NA}
X39GM000530	{kpm:KPHS_p100430; }	{NA}	{NA}	{NA}	{NA}
X39GM000531	{kpm:KPHS_p100450; }	{NA}	{NA}	{NA}	{NA}
X39GM000532	{kpm:KPHS_p100460; K02314 dnaB replicative DNA helicase 3.6.4.12 Genetic Information Processing; Replication and repair; DNA replication [PATH:ko03030] Cellular Processes; Cell growth and death; Cell cycle - Caulobacter [PATH:ko04112] }	{NA}	{GO:0005524; ATP binding; molecular_function GO:0003678; DNA helicase activity; molecular_function GO:0006260; DNA replication; biological_process GO:0046983; protein dimerization activity; molecular_function}	{NA}	{NA}
X39GM000533	{kpx:PMK1_b00054; }	{NA}	{NA}	{NA}	{NA}
X39GM000534	{kpx:PMK1_b00053; }	{NA}	{NA}	{NA}	{NA}
X39GM000535	{kpx:PMK1_b00052; }	{NA}	{NA}	{NA}	{NA}
X39GM000536	{kpx:PMK1_b00051; K03496 parA, soj chromosome partitioning protein -- }	{NP_718386; COG1192 Cellulose biosynthesis protein BcsQ N Cell motility ;}	{GO:0006614; SRP-dependent cotranslational protein targeting to membrane; biological_process GO:0005525; GTP binding; molecular_function GO:0005524; ATP binding; molecular_function GO:0055114; oxidation-reduction process; biological_process GO:0008152; NA GO:0016301; kinase activity; molecular_function GO:0016491; oxidoreductase activity; molecular_function}	{NA}	{NA}
X39GM000537	{eclx:LI66_23100; }	{NA}	{NA}	{NA}	{NA}
X39GM000538	{yal:AT01_1258; }	{NA}	{NA}	{NA}	{NA}
X39GM000539	{enr:H650_00055; K03502 umuC DNA polymerase V -- }	{YP_007506059; COG0389 Nucleotidyltransferase/DNA polymerase involved in DNA repair L Replication, recombination and repair ;}	{GO:0006281; DNA repair; biological_process GO:0003887; DNA-directed DNA polymerase activity; molecular_function GO:0003684; damaged DNA binding; molecular_function}	{NA}	{NA}
X39GM000542	{pses:PSCI_4418; }	{NA}	{NA}	{NA}	{NA}
X39GM000544	{kin:AB182_00665; }	{NA}	{NA}	{NA}	{NA}
X39GM000545	{NA}	{NA}	{GO:0043565; sequence-specific DNA binding; molecular_function}	{NA}	{NA}
X39GM000546	{kin:AB182_00715; }	{NA}	{GO:0016987; sigma factor activity; molecular_function GO:0003700; sequence-specific DNA binding transcription factor activity; molecular_function GO:0003677; DNA binding; molecular_function GO:0006352; transcription initiation, DNA-dependent; biological_process GO:0006355; regulation of transcription, DNA-dependent; biological_process GO:0043565; sequence-specific DNA binding; molecular_function}	{NA}	{NA}
X39GM000547	{kpz:KPNIH27_27145; }	{NA}	{NA}	{NA}	{NA}
X39GM000548	{ecli:ECNIH5_23030; }	{YP_003540590; COG0582 Integrase LX Replication, recombination and repair ; Mobilome: prophages, transposons;}	{GO:0015074; DNA integration; biological_process GO:0003677; DNA binding; molecular_function GO:0006310; DNA recombination; biological_process}	{NA}	{NA}
X39GM000549	{ecli:ECNIH5_23035; K18640 parM plasmid segregation protein ParM -- }	{NA}	{GO:0016787; hydrolase activity; molecular_function}	{NA}	{NA}
X39GM000550	{NA}	{NA}	{NA}	{NA}	{NA}
X39GM000551	{kin:AB182_00745; }	{NA}	{NA}	{NA}	{NA}
X39GM000552	{NA}	{NA}	{NA}	{NA}	{NA}
X39GM000553	{ecli:ECNIH5_23050; }	{NA}	{NA}	{NA}	{NA}
X39GM000554	{kin:AB182_00760; }	{NA}	{NA}	{NA}	{NA}
X39GM000555	{kin:AB182_00260; K03630 radC DNA repair protein RadC -- }	{NP_309430; COG2003 DNA repair protein RadC, contains a helix-hairpin-helix DNA-binding motif L Replication, recombination and repair ;}	{NA}	{NA}	{NA}
X39GM000556	{kin:AB182_00265; }	{NA}	{GO:0006355; regulation of transcription, DNA-dependent; biological_process GO:0043565; sequence-specific DNA binding; molecular_function GO:0003677; DNA binding; molecular_function}	{NA}	{NA}
X39GM000557	{kpz:KPNIH27_27075; }	{NA}	{NA}	{NA}	{NA}
X39GM000558	{ecli:ECNIH5_23095; }	{NA}	{NA}	{NA}	{NA}
X39GM000559	{kin:AB182_00280; }	{NA}	{NA}	{NA}	{NA}
X39GM000560	{ecli:ECNIH5_23105; K05839 hha haemolysin expression modulating protein -- }	{NA}	{NA}	{NA}	{NA}
X39GM000561	{NA}	{NA}	{NA}	{NA}	{NA}
X39GM000562	{kpz:KPNIH27_27365; }	{NA}	{NA}	{NA}	{NA}
X39GM000563	{kpz:KPNIH27_27370; }	{NA}	{NA}	{NA}	{NA}
X39GM000564	{kin:AB182_00300; }	{NA}	{NA}	{NA}	{NA}
X39GM000565	{kin:AB182_00305; }	{NA}	{NA}	{NA}	{NA}
X39GM000566	{kpz:KPNIH27_27385; }	{NA}	{NA}	{NA}	{NA}
X39GM000567	{NA}	{NA}	{NA}	{NA}	{NA}
X39GM000568	{NA}	{NA}	{NA}	{NA}	{NA}
X39GM000569	{NA}	{NA}	{NA}	{NA}	{NA}
X39GM000570	{kpz:KPNIH27_27410; }	{NA}	{NA}	{NA}	{NA}
X39GM000571	{pfn:HZ99_18735; }	{NA}	{GO:0006355; regulation of transcription, DNA-dependent; biological_process}	{NA}	{NA}
X39GM000572	{pst:PSPTO_B0036; }	{YP_003540623; COG3843 Type IV secretory pathway, VirD2 components (relaxase) U Intracellular trafficking, secretion, and vesicular transport ;}	{NA}	{NA}	{NA}
X39GM000573	{sfo:Z042_14360; }	{NA}	{GO:0007165; signal transduction; biological_process GO:0000156; two-component response regulator activity; molecular_function GO:0000160; two-component signal transduction system (phosphorelay); biological_process GO:0000155; two-component sensor activity; molecular_function GO:0005524; ATP binding; molecular_function GO:0006355; regulation of transcription, DNA-dependent; biological_process GO:…	{NA}	{NA}
X39GM000574	{sra:SerAS13_0335; }	{YP_008161670; COG3915 Uncharacterized protein S Function unknown ;}	{GO:0009055; NA GO:0055114; oxidation-reduction process; biological_process}	{NA}	{NA}
X39GM000575	{spe:Spro_4052; }	{NA}	{NA}	{NA}	{NA}
X39GM000576	{sra:SerAS13_0337; }	{NA}	{GO:0000160; two-component signal transduction system (phosphorelay); biological_process GO:0000156; two-component response regulator activity; molecular_function GO:0006355; regulation of transcription, DNA-dependent; biological_process}	{NA}	{NA}
X39GM000577	{NA}	{NA}	{NA}	{NA}	{NA}
X39GM000578	{pfx:A7318_28235; }	{YP_003610937; COG0741 Soluble lytic murein transglycosylase and related regulatory proteins (some contain LysM/invasin domains) M Cell wall/membrane/envelope biogenesis ;}	{NA}	{VFG042890; AI115 type IV pili pilT hypothetical protein - - - -}	{NA}
X39GM000579	{seb:STM474_p268; K12205 dotD, traH defect in organelle trafficking protein DotD -- }	{NA}	{NA}	{NA}	{NA}
X39GM000580	{seb:STM474_p267; K12204 dotC, traI defect in organelle trafficking protein DotC -- }	{NA}	{NA}	{NA}	{NA}
X39GM000581	{pfx:A7318_28220; K12203 dotB, traJ defect in organelle trafficking protein DotB -- }	{YP_002923811; COG2805 Tfp pilus assembly protein PilT, pilus retraction ATPase NW Cell motility ; Extracellular structures ;}	{GO:0005524; ATP binding; molecular_function GO:0016021; integral to membrane; cellular_component GO:0007049; cell cycle; biological_process GO:0006810; transport; biological_process GO:0000166; nucleotide binding; molecular_function GO:0003677; DNA binding; molecular_function GO:0016887; ATPase activity; molecular_function GO:0007059; chromosome segregation; biological_process GO:0051301; cell d…	{VFG016192; CVF518 Type IV pili biosynthesis pilU type IV pilus biogenesis protein - - - -}	{NA}
X39GM000582	{ysi:BF17_00305; K12222 icmT, traK intracellular multiplication protein IcmT -- }	{NA}	{GO:0006810; transport; biological_process GO:0005886; plasma membrane; cellular_component}	{NA}	{NA}
X39GM000583	{pfx:A7318_28210; K06919 K06919 putative DNA primase/helicase -- }	{NA}	{NA}	{NA}	{NA}
X39GM000584	{pfx:A7318_28205; K12227 K12227, traL TraL protein -- }	{NA}	{NA}	{NA}	{NA}
X39GM000585	{pst:PSPTOA0051; K12214 icmL, traM, dotI intracellular multiplication protein IcmL -- }	{NA}	{NA}	{NA}	{NA}
X39GM000586	{pst:PSPTOA0052; K12213 icmK, traN, dotH intracellular multiplication protein IcmK -- }	{NA}	{NA}	{NA}	{NA}
X39GM000587	{NA}	{NA}	{GO:0030288; outer membrane-bounded periplasmic space; cellular_component}	{NA}	{NA}
X39GM000588	{pst:PSPTOA0053; K12209 icmE, dotG intracellular multiplication protein IcmE -- }	{NA}	{NA}	{NA}	{NA}
X39GM000589	{NA}	{NA}	{GO:0005615; extracellular space; cellular_component GO:0005737; cytoplasm; cellular_component GO:0031386; NA GO:0043093; cytokinesis by binary fission; biological_process GO:0016567; protein ubiquitination; biological_process GO:0000917; barrier septum formation; biological_process GO:0016881; acid-amino acid ligase activity; molecular_function GO:0010506; regulation of autophagy; biological_pro…	{NA}	{NA}
X39GM000590	{pst:PSPTOA0055; }	{NA}	{NA}	{NA}	{NA}
X39GM000591	{NA}	{NA}	{GO:0008137; NADH dehydrogenase (ubiquinone) activity; molecular_function GO:0055114; oxidation-reduction process; biological_process}	{NA}	{NA}
X39GM000592	{eay:EAM_P274; }	{NA}	{NA}	{NA}	{NA}
X39GM000593	{NA}	{NA}	{NA}	{NA}	{NA}
X39GM000594	{pst:PSPTOA0060; K12206 icmB, dotO intracellular multiplication protein IcmB -- }	{YP_002925051; COG3451 Type IV secretory pathway, VirB4 component U Intracellular trafficking, secretion, and vesicular transport ;}	{GO:0016887; ATPase activity; molecular_function GO:0005524; ATP binding; molecular_function GO:0005525; GTP binding; molecular_function GO:0003724; RNA helicase activity; molecular_function GO:0003723; RNA binding; molecular_function}	{NA}	{NA}
X39GM000595	{pst:PSPTOA0062; }	{NA}	{NA}	{NA}	{NA}
X39GM000596	{NA}	{NA}	{GO:0009306; protein secretion; biological_process GO:0016021; integral to membrane; cellular_component GO:0015450; P-P-bond-hydrolysis-driven protein transmembrane transporter activity; molecular_function}	{NA}	{NA}
X39GM000597	{pst:PSPTO_B0069; }	{NA}	{NA}	{NA}	{NA}
X39GM000598	{NA}	{NA}	{NA}	{NA}	{NA}
X39GM000599	{pst:PSPTO_B0072; K12218 icmP, trbA intracellular multiplication protein IcmP -- }	{NA}	{GO:0016407; acetyltransferase activity; molecular_function}	{NA}	{NA}
X39GM000600	{pst:PSPTOA0067; K12228 trbB TrbB protein -- }	{NA}	{GO:0045454; cell redox homeostasis; biological_process}	{NA}	{NA}
X39GM000601	{eay:EAM_P285; K12217 icmO, trbC, dotL intracellular multiplication protein IcmO -- }	{YP_003540666; COG3505 Type IV secretory pathway, VirD4 component, TraG/TraD family ATPase U Intracellular trafficking, secretion, and vesicular transport ;}	{NA}	{NA}	{NA}
X39GM000603	{kmi:VW41_12465; }	{YP_545604; COG4644 Transposase and inactivated derivatives, TnpA family X Mobilome: prophages, transposons;}	{GO:0004803; transposase activity; molecular_function GO:0006313; transposition, DNA-mediated; biological_process}	{NA}	{NA}
X39GM000605	{cfar:CI104_26930; K19271 catA chloramphenicol O-acetyltransferase type A 2.3.1.28 }	{YP_007506298; COG4845 Chloramphenicol O-acetyltransferase V Defense mechanisms ;}	{GO:0008152; NA GO:0016747; transferase activity, transferring acyl groups other than amino-acyl groups; molecular_function GO:0016746; transferase activity, transferring acyl groups; molecular_function GO:0008811; chloramphenicol O-acetyltransferase activity; molecular_function}	{NA}	{ardb_1605; cata2 90 -- chloramphenicol cata Group A chloramphenicol acetyltransferase, which can inactivate chloramphenicol.}
X39GM000606	{ete:ETEE_p2001; }	{NA}	{NA}	{NA}	{NA}
X39GM000608	{axx:ERS451415_05782; }	{YP_003278557; COG1961 Site-specific DNA recombinase related to the DNA invertase Pin L Replication, recombination and repair ;}	{GO:0003677; DNA binding; molecular_function GO:0006310; DNA recombination; biological_process GO:0000150; recombinase activity; molecular_function GO:0043565; sequence-specific DNA binding; molecular_function}	{NA}	{NA}
X39GM000609	{NA}	{NA}	{NA}	{NA}	{NA}
X39GM000610	{ebf:D782_3516; K02014 TC.FEV.OM iron complex outermembrane recepter protein -- }	{YP_008159785; COG4772 Outer membrane receptor for Fe3+-dicitrate P Inorganic ion transport and metabolism ;}	{GO:0004872; receptor activity; molecular_function GO:0006810; transport; biological_process GO:0005215; NA GO:0016020; membrane; cellular_component}	{NA}	{NA}
X39GM000612	{kpj:N559_5233; K18767 blaCTX-M beta-lactamase class A CTX-M 3.5.2.6 Human Diseases; Drug resistance; beta-Lactam resistance [PATH:ko01501] }	{YP_004215575; COG2367 Beta-lactamase class A V Defense mechanisms ;}	{GO:0006541; glutamine metabolic process; biological_process GO:0008658; penicillin binding; molecular_function GO:0009002; serine-type D-Ala-D-Ala carboxypeptidase activity; molecular_function GO:0004359; glutaminase activity; molecular_function GO:0006508; proteolysis; biological_process}	{NA}	{ardb_2955; bl2be_ctxm 75 -- monobactam,penicillin,cephalosporin_iii,ceftazidime,cephalosporin_ii,cephalosporin_i bla_a Class A beta-lactamase. This enzyme breaks the beta-lactam antibiotic ring open and deactivates the molecule's antibacterial properites. }
X39GM000613	{ahh:RY45_02970; }	{YP_006912048; COG3385 IS4 transposase X Mobilome: prophages, transposons;}	{GO:0006313; transposition, DNA-mediated; biological_process GO:0004803; transposase activity; molecular_function GO:0003677; DNA binding; molecular_function}	{NA}	{NA}
X39GM000614	{kmi:VW41_12455; }	{NP_230163; COG0840 Methyl-accepting chemotaxis protein NT Cell motility ; Signal transduction mechanisms ;}	{GO:0005524; ATP binding; molecular_function GO:0030674; protein binding, bridging; molecular_function GO:0015078; hydrogen ion transmembrane transporter activity; molecular_function GO:0016021; integral to membrane; cellular_component GO:0004828; serine-tRNA ligase activity; molecular_function GO:0030168; platelet activation; biological_process GO:0033179; proton-transporting V-type ATPase, V0 d…	{NA}	{NA}
X39GM000615	{ypm:YP_pCRY01; }	{NA}	{GO:0006276; plasmid maintenance; biological_process}	{NA}	{NA}
X39GM000616	{koe:A225_R1p0035; }	{NA}	{NA}	{NA}	{NA}
X39GM000617	{koe:A225_R1p0040; }	{YP_225997; COG1961 Site-specific DNA recombinase related to the DNA invertase Pin L Replication, recombination and repair ;}	{GO:0006310; DNA recombination; biological_process GO:0003677; DNA binding; molecular_function GO:0000150; recombinase activity; molecular_function}	{NA}	{NA}
X39GM000618	{eclx:LI66_23090; }	{YP_003662356; COG3464 Transposase X Mobilome: prophages, transposons;}	{NA}	{NA}	{NA}
X39GM000619	{koe:A225_R1p0410; }	{YP_001144375; COG1961 Site-specific DNA recombinase related to the DNA invertase Pin L Replication, recombination and repair ;}	{GO:0000150; recombinase activity; molecular_function GO:0003700; sequence-specific DNA binding transcription factor activity; molecular_function GO:0006310; DNA recombination; biological_process GO:0003677; DNA binding; molecular_function GO:0043565; sequence-specific DNA binding; molecular_function GO:0006355; regulation of transcription, DNA-dependent; biological_process}	{NA}	{NA}
X39GM000620	{eclx:LI66_23080; K18555 qnr, mcbG fluoroquinolone resistance protein -- }	{YP_002263022; COG1357 Uncharacterized protein YjbI, contains pentapeptide repeats S Function unknown ;}	{NA}	{NA}	{ardb_474; qnrs 80 -- fluoroquinolone qnr Pentapeptide repeat family, which protects DNA gyrase from the inhibition of quinolones.}
X39GM000621	{eclx:LI66_23090; }	{YP_003662356; COG3464 Transposase X Mobilome: prophages, transposons;}	{NA}	{NA}	{NA}
X39GM000622	{koe:A225_R1p0040; }	{YP_007699032; COG1961 Site-specific DNA recombinase related to the DNA invertase Pin L Replication, recombination and repair ;}	{GO:0000150; recombinase activity; molecular_function GO:0003677; DNA binding; molecular_function GO:0006310; DNA recombination; biological_process}	{NA}	{NA}
X39GM000623	{xfa:XF_b0001; }	{NA}	{NA}	{NA}	{NA}
X39GM000624	{NA}	{NA}	{NA}	{NA}	{NA}
X39GM000625	{kvd:KR75_23765; }	{NA}	{NA}	{NA}	{NA}
X39GM000629	{NA}	{NA}	{NA}	{NA}	{NA}
X39GM000630	{NA}	{NA}	{NA}	{NA}	{NA}
X39GM000631	{NA}	{NA}	{NA}	{NA}	{NA}
X39GM000632	{NA}	{NA}	{GO:0006629; lipid metabolic process; biological_process GO:0016788; hydrolase activity, acting on ester bonds; molecular_function}	{NA}	{NA}
X39GM000633	{NA}	{NA}	{NA}	{NA}	{NA}
X39GM000636	{kpz:KPNIH27_18945; }	{NA}	{NA}	{NA}	{NA}
X39GM000637	{NA}	{NA}	{NA}	{NA}	{NA}
X39GM000650	{NA}	{NA}	{NA}	{NA}	{NA}
X39GM000682	{kpe:KPK_1273; }	{NA}	{NA}	{NA}	{NA}
X39GM000694	{kpa:KPNJ1_01447; }	{YP_002934536; COG0582 Integrase LX Replication, recombination and repair ; Mobilome: prophages, transposons;}	{NA}	{NA}	{NA}
X39GM000695	{ear:CCG33997; }	{NA}	{GO:0006259; DNA metabolic process; biological_process GO:0003677; DNA binding; molecular_function}	{NA}	{NA}
X39GM000696	{ear:CCG33998; K10906 recE exodeoxyribonuclease VIII 3.1.11.- }	{NA}	{NA}	{NA}	{NA}
X39GM000697	{psi:S70_16725; }	{NA}	{GO:0009372; quorum sensing; biological_process}	{NA}	{NA}
X39GM000698	{kpr:KPR_1449; }	{NA}	{NA}	{NA}	{NA}
X39GM000699	{ecle:ECNIH2_14525; }	{NA}	{GO:0005515; protein binding; molecular_function GO:0007165; signal transduction; biological_process}	{NA}	{NA}
X39GM000700	{kpa:KPNJ1_01455; }	{NA}	{NA}	{NA}	{NA}
X39GM000701	{kpr:KPR_1450; }	{NA}	{GO:0043565; sequence-specific DNA binding; molecular_function}	{NA}	{NA}
X39GM000702	{kpa:KPNJ1_01457; }	{NA}	{NA}	{NA}	{NA}
X39GM000703	{csi:P262_02748; }	{NA}	{GO:0003676; nucleic acid binding; molecular_function GO:0008270; zinc ion binding; molecular_function GO:0006351; transcription, DNA-dependent; biological_process}	{NA}	{NA}
X39GM000705	{ecly:LI62_17825; }	{NA}	{NA}	{NA}	{NA}
X39GM000706	{kpa:KPNJ1_01461; }	{NA}	{GO:0016032; NA GO:0008833; deoxyribonuclease IV (phage-T4-induced) activity; molecular_function GO:0015074; DNA integration; biological_process}	{NA}	{NA}
X39GM000707	{kpa:KPNJ1_01462; }	{NA}	{NA}	{NA}	{NA}
X39GM000708	{kpne:KU54_016910; }	{NA}	{NA}	{NA}	{NA}
X39GM000709	{NA}	{NA}	{NA}	{NA}	{NA}
X39GM000710	{kpr:KPR_3462; }	{NA}	{NA}	{NA}	{NA}
X39GM000711	{kpx:PMK1_ndm00045; }	{NA}	{NA}	{NA}	{NA}
X39GM000712	{NA}	{NA}	{NA}	{NA}	{NA}
X39GM000713	{NA}	{NA}	{NA}	{NA}	{NA}
X39GM000714	{kpa:KPNJ1_01471; }	{NA}	{NA}	{NA}	{NA}
X39GM000715	{kpb:FH42_01725; }	{YP_004682611; COG3344 Retron-type reverse transcriptase X Mobilome: prophages, transposons;}	{GO:0003723; RNA binding; molecular_function GO:0003964; RNA-directed DNA polymerase activity; molecular_function GO:0006278; RNA-dependent DNA replication; biological_process}	{NA}	{NA}
X39GM000717	{kpa:KPNJ1_01473; K07474 xtmA phage terminase small subunit -- }	{YP_003897163; COG3728 Phage terminase, small subunit X Mobilome: prophages, transposons;}	{GO:0030145; manganese ion binding; molecular_function GO:0006323; DNA packaging; biological_process GO:0004721; phosphoprotein phosphatase activity; molecular_function GO:0000287; magnesium ion binding; molecular_function}	{NA}	{NA}
X39GM000718	{kpc:KPNIH10_19195; }	{NA}	{GO:0004003; ATP-dependent DNA helicase activity; molecular_function GO:0003677; DNA binding; molecular_function GO:0005524; ATP binding; molecular_function}	{NA}	{NA}
X39GM000719	{kpc:KPNIH10_19190; }	{NA}	{NA}	{NA}	{NA}
X39GM000720	{kpc:KPNIH10_19180; }	{NA}	{NA}	{NA}	{NA}
X39GM000721	{kpc:KPNIH10_19175; }	{NA}	{GO:0005525; GTP binding; molecular_function GO:0005634; nucleus; cellular_component GO:0005737; cytoplasm; cellular_component}	{NA}	{NA}
X39GM000722	{kpc:KPNIH10_19170; }	{NA}	{NA}	{NA}	{NA}
X39GM000723	{kpc:KPNIH10_19165; }	{NA}	{GO:0016021; integral to membrane; cellular_component GO:0004190; aspartic-type endopeptidase activity; molecular_function}	{NA}	{NA}
X39GM000724	{kpc:KPNIH10_19160; }	{NA}	{NA}	{NA}	{NA}
X39GM000725	{kpc:KPNIH10_19155; }	{NA}	{NA}	{NA}	{NA}
X39GM000726	{kpc:KPNIH10_19150; }	{NA}	{GO:0005643; nuclear pore; cellular_component GO:0006606; protein import into nucleus; biological_process}	{NA}	{NA}
X39GM000727	{kpc:KPNIH10_19145; }	{NA}	{NA}	{NA}	{NA}
X39GM000728	{kpc:KPNIH10_19140; }	{NA}	{NA}	{NA}	{NA}
X39GM000729	{kpc:KPNIH10_19135; }	{NA}	{NA}	{NA}	{NA}
X39GM000730	{kpc:KPNIH10_19130; }	{NA}	{NA}	{NA}	{NA}
X39GM000731	{ecly:LI62_17685; }	{NA}	{NA}	{NA}	{NA}
X39GM000732	{ecly:LI62_17680; }	{NA}	{NA}	{NA}	{NA}
X39GM000733	{ecly:LI62_17675; }	{NA}	{NA}	{NA}	{NA}
X39GM000734	{csj:CSK29544_03024; }	{NA}	{NA}	{NA}	{NA}
X39GM000735	{NA}	{NA}	{NA}	{NA}	{NA}
X39GM000736	{kpc:KPNIH10_19085; }	{NA}	{NA}	{NA}	{NA}
X39GM000737	{NA}	{NA}	{NA}	{NA}	{NA}
X39GM000738	{NA}	{NA}	{NA}	{NA}	{NA}
X39GM000739	{kpa:KPNJ1_01496; }	{NA}	{NA}	{NA}	{NA}
X39GM000740	{kpa:KPNJ1_01497; }	{NA}	{NA}	{NA}	{NA}
X39GM000742	{kpr:KPR_1864; }	{NA}	{GO:0006810; transport; biological_process GO:0005886; plasma membrane; cellular_component}	{NA}	{NA}
X39GM000759	{kpa:KPNJ1_01518; }	{NA}	{NA}	{NA}	{NA}
X39GM000769	{NA}	{NA}	{NA}	{NA}	{NA}
X39GM000815	{kpa:KPNJ1_01576; }	{NA}	{NA}	{NA}	{NA}
X39GM000826	{bbk:BARBAKC583_1300; }	{NA}	{NA}	{NA}	{NA}
X39GM000837	{kvd:KR75_27495; }	{NA}	{NA}	{NA}	{NA}
X39GM000846	{ses:SARI_02631; K11893 impJ, vasE type VI secretion system protein ImpJ -- Cellular Processes; Cellular community - prokaryotes; Biofilm formation - Pseudomonas aeruginosa [PATH:ko02025] }	{YP_003537464; COG3522 Predicted component of the type VI protein secretion system U Intracellular trafficking, secretion, and vesicular transport ;}	{NA}	{VFG035130; CVF734 SCI-I T6SS ECNA114_2856 hypothetical protein - - - -}	{NA}
X39GM000847	{ses:SARI_02630; K11892 impK, ompA, vasF, dotU type VI secretion system protein ImpK -- Environmental Information Processing; Membrane transport; Bacterial secretion system [PATH:ko03070] }	{YP_003537465; COG3455 Type VI protein secretion system component VasF U Intracellular trafficking, secretion, and vesicular transport ;}	{GO:0004478; methionine adenosyltransferase activity; molecular_function GO:0006556; S-adenosylmethionine biosynthetic process; biological_process}	{VFG035146; CVF734 SCI-I T6SS ECNA114_28561 hypothetical protein - - - -}	{NA}
X39GM000848	{ses:SARI_02629; }	{YP_003537466; COG2885 Outer membrane protein OmpA and related peptidoglycan-associated (lipo)proteins M Cell wall/membrane/envelope biogenesis ;}	{NA}	{NA}	{NA}
X39GM000852	{ses:SARI_02625; }	{NA}	{NA}	{NA}	{NA}
X39GM000853	{NA}	{NA}	{NA}	{NA}	{NA}
X39GM000854	{bgu:KS03_2527; K01185 E3.2.1.17 lysozyme 3.2.1.17 }	{NA}	{GO:0003796; lysozyme activity; molecular_function GO:0009253; peptidoglycan catabolic process; biological_process GO:0016998; cell wall macromolecule catabolic process; biological_process}	{NA}	{NA}
X39GM000855	{NA}	{NA}	{NA}	{NA}	{NA}
X39GM000856	{NA}	{NA}	{NA}	{NA}	{NA}
X39GM000857	{NA}	{NA}	{NA}	{NA}	{NA}
X39GM000858	{cdm:AFK67_09000; }	{NA}	{NA}	{NA}	{NA}
X39GM000859	{ses:SARI_02620; }	{NA}	{NA}	{NA}	{NA}
X39GM000860	{ses:SARI_02615; }	{NA}	{NA}	{NA}	{NA}
X39GM000861	{ses:SARI_02614; }	{NA}	{NA}	{NA}	{NA}
X39GM000862	{eclx:LI66_11890; K11891 impL, vasK, icmF type VI secretion system protein ImpL -- Cellular Processes; Cellular community - prokaryotes; Biofilm formation - Pseudomonas aeruginosa [PATH:ko02025] Environmental Information Processing; Membrane transport; Bacterial secretion system [PATH:ko03070] }	{YP_003537474; COG3523 Type VI protein secretion system component VasK U Intracellular trafficking, secretion, and vesicular transport ;}	{NA}	{VFG035237; CVF734 SCI-I T6SS c3398 hypothetical protein - - - -}	{NA}
X39GM000863	{NA}	{NA}	{NA}	{NA}	{NA}
X39GM000866	{NA}	{NA}	{NA}	{NA}	{NA}
X39GM000870	{ses:SARI_02595; }	{NA}	{NA}	{NA}	{NA}
X39GM000871	{eec:EcWSU1_01558; }	{YP_003537486; COG3501 Uncharacterized conserved protein, implicated in type VI secretion and phage assembly UXR Intracellular trafficking, secretion, and vesicular transport ; Mobilome: prophages, transposons; General function prediction only ;}	{NA}	{NA}	{NA}
X39GM000872	{ecly:LI62_08610; }	{NA}	{NA}	{NA}	{NA}
X39GM000873	{xbo:XBJ1_1877; }	{NA}	{NA}	{NA}	{NA}
X39GM000874	{ses:SARI_00371; K11904 vgrG type VI secretion system secreted protein VgrG -- Environmental Information Processing; Membrane transport; Bacterial secretion system [PATH:ko03070] }	{YP_003537479; COG4253 Uncharacterized conserved protein, DUF2345 family S Function unknown ;}	{NA}	{VFG035208; CVF734 SCI-I T6SS ECO103_3364 hypothetical protein - - - -}	{NA}
X39GM000875	{ses:SARI_00370; }	{NP_519828; COG1652 Nucleoid-associated protein YgaU, contains BON and LysM domains S Function unknown ;}	{GO:0046983; protein dimerization activity; molecular_function GO:0016021; integral to membrane; cellular_component GO:0050829; defense response to Gram-negative bacterium; biological_process GO:0019835; cytolysis; biological_process}	{NA}	{NA}
X39GM000876	{ses:SARI_00369; }	{NA}	{NA}	{NA}	{NA}
X39GM000877	{NA}	{NA}	{NA}	{NA}	{NA}
X39GM000885	{NA}	{NA}	{NA}	{NA}	{NA}
X39GM000947	{NA}	{NA}	{NA}	{NA}	{NA}
X39GM000948	{kpk:A593_03190; K00784 rnz ribonuclease Z 3.1.26.11 Genetic Information Processing; Translation; RNA transport [PATH:ko03013] }	{YP_002237337; COG1234 Ribonuclease BN, tRNA processing enzyme J Translation, ribosomal structure and biogenesis ;}	{GO:0008033; tRNA processing; biological_process GO:0016787; hydrolase activity; molecular_function}	{NA}	{NA}
X39GM000982	{NA}	{NA}	{NA}	{NA}	{NA}
X39GM000997	{kpi:D364_13370; K09904 K09904 uncharacterized protein -- }	{YP_002237389; COG3082 Uncharacterized conserved protein YejL, UPF0352 family S Function unknown ;}	{NA}	{NA}	{NA}
X39GM001012	{kpe:KPK_1552; }	{YP_002237404; COG2200 EAL domain, c-di-GMP-specific phosphodiesterase class I (or its enzymatically inactive variant) T Signal transduction mechanisms ;}	{NA}	{NA}	{NA}
X39GM001013	{kpk:A593_02865; }	{YP_002237404; COG2200 EAL domain, c-di-GMP-specific phosphodiesterase class I (or its enzymatically inactive variant) T Signal transduction mechanisms ;}	{NA}	{NA}	{NA}
X39GM001025	{NA}	{NA}	{NA}	{NA}	{NA}
X39GM001042	{kpk:A593_02725; K07154 hipA serine/threonine-protein kinase HipA 2.7.11.1 }	{YP_004215553; COG3550 Serine/threonine protein kinase HipA, toxin component of the HipAB toxin-antitoxin module T Signal transduction mechanisms ;}	{NA}	{NA}	{NA}
X39GM001043	{kvq:SP68_06875; K07154 hipA serine/threonine-protein kinase HipA 2.7.11.1 }	{YP_008488705; COG3550 Serine/threonine protein kinase HipA, toxin component of the HipAB toxin-antitoxin module T Signal transduction mechanisms ;}	{NA}	{NA}	{NA}
X39GM001103	{NA}	{NA}	{GO:0016020; membrane; cellular_component GO:0005524; ATP binding; molecular_function GO:0007165; signal transduction; biological_process GO:0000155; two-component sensor activity; molecular_function}	{NA}	{NA}
X39GM001104	{kpi:D364_12855; }	{YP_002237495; COG2205 K+-sensing histidine kinase KdpD T Signal transduction mechanisms ;}	{NA}	{NA}	{NA}
X39GM001112	{NA}	{NA}	{NA}	{NA}	{NA}
X39GM001113	{pstw:DSJ_00800; }	{YP_002933941; COG3415 Transposase X Mobilome: prophages, transposons;}	{NA}	{NA}	{NA}
X39GM001114	{psts:E05_34250; }	{YP_008832403; COG3293 Transposase X Mobilome: prophages, transposons;}	{GO:0004803; transposase activity; molecular_function GO:0006313; transposition, DNA-mediated; biological_process GO:0003677; DNA binding; molecular_function}	{NA}	{NA}
X39GM001119	{kva:Kvar_1552; K01104 E3.1.3.48 protein-tyrosine phosphatase 3.1.3.48 }	{NP_309165; COG0394 Protein-tyrosine-phosphatase T Signal transduction mechanisms ;}	{NA}	{VFG007627; CVF282 Capsular polysaccharide wzb cytoplasmic phosphatase - - - -}	{NA}
X39GM001120	{kpm:KPHS_35660; K12992 rfbN rhamnosyltransferase 2.4.1.- Cellular Processes; Cellular community - prokaryotes; Biofilm formation - Pseudomonas aeruginosa [PATH:ko02025] }	{NA}	{NA}	{NA}	{NA}
X39GM001122	{kle:AO703_13725; }	{NA}	{NA}	{NA}	{NA}
X39GM001126	{bgj:AWC36_11600; K00067 rfbD, rmlD dTDP-4-dehydrorhamnose reductase 1.1.1.133 Metabolism; Biosynthesis of other secondary metabolites; Streptomycin biosynthesis [PATH:ko00521] Metabolism; Metabolism of terpenoids and polyketides; Polyketide sugar unit biosynthesis [PATH:ko00523] }	{YP_003882173; COG1091 dTDP-4-dehydrorhamnose reductase M Cell wall/membrane/envelope biogenesis ;}	{GO:0045226; extracellular polysaccharide biosynthetic process; biological_process GO:0009058; biosynthetic process; biological_process GO:0004482; mRNA (guanine-N7-)-methyltransferase activity; molecular_function GO:0004483; mRNA (nucleoside-2'-O-)-methyltransferase activity; molecular_function GO:0004252; serine-type endopeptidase activity; molecular_function GO:0003824; NA GO:0044237; cellular…	{VFG007662; CVF282 Capsular polysaccharide rmlD dTDP-4-dehydrorhamnose reductase - - - -}	{NA}
X39GM001127	{vsp:VS_0226; }	{YP_004512120; COG0438 Glycosyltransferase involved in cell wall bisynthesis M Cell wall/membrane/envelope biogenesis ;}	{GO:0009058; biosynthetic process; biological_process}	{NA}	{NA}
X39GM001129	{stan:STA3757_04690; }	{YP_004437169; COG0463 Glycosyltransferase involved in cell wall bisynthesis M Cell wall/membrane/envelope biogenesis ;}	{NA}	{NA}	{NA}
X39GM001130	{hsd:SD1D_0619; }	{NA}	{NA}	{NA}	{NA}
X39GM001131	{NA}	{NA}	{NA}	{NA}	{NA}
X39GM001132	{NA}	{NA}	{NA}	{NA}	{NA}
X39GM001133	{ecy:ECSE_2314; K03328 TC.PST polysaccharide transporter, PST family -- }	{YP_007543091; COG2244 Membrane protein involved in the export of O-antigen and teichoic acid M Cell wall/membrane/envelope biogenesis ;}	{GO:0000271; polysaccharide biosynthetic process; biological_process GO:0016020; membrane; cellular_component}	{NA}	{NA}
X39GM001134	{panr:A7J50_1812; }	{NA}	{NA}	{NA}	{NA}
X39GM001135	{mvr:X781_20010; }	{YP_003829691; COG1898 dTDP-4-dehydrorhamnose 3,5-epimerase or related enzyme M Cell wall/membrane/envelope biogenesis ;}	{GO:0008080; N-acetyltransferase activity; molecular_function}	{NA}	{NA}
X39GM001136	{kco:BWI95_20045; }	{NP_931971; COG0399 dTDP-4-amino-4,6-dideoxygalactose transaminase M Cell wall/membrane/envelope biogenesis ;}	{NA}	{VFG037998; CVF775 Capsule M3Q_290 hypothetical protein GBS can be suclassified into serotypes according to the immunologic type of the polysaccharide capsule. Of the nine serotypes described so far, the type Ia, Ib, II, III and V are reponsible for the majority of invasive human GBS disease; serotype III is particularly important becasue it causes the majority of infection to neonates The differ…	{NA}
X39GM001137	{NA}	{NA}	{GO:0055085; transmembrane transport; biological_process GO:0015297; antiporter activity; molecular_function GO:0015238; drug transmembrane transporter activity; molecular_function GO:0016020; membrane; cellular_component GO:0006855; drug transmembrane transport; biological_process GO:0000271; polysaccharide biosynthetic process; biological_process}	{NA}	{NA}
X39GM001139	{psts:E05_34250; }	{YP_008832403; COG3293 Transposase X Mobilome: prophages, transposons;}	{GO:0004803; transposase activity; molecular_function GO:0006313; transposition, DNA-mediated; biological_process GO:0003677; DNA binding; molecular_function}	{NA}	{NA}
X39GM001141	{kok:KONIH1_09710; }	{NA}	{NA}	{NA}	{NA}
X39GM001142	{ekb:BFV64_05410; K07481 K07481 transposase, IS5 family -- }	{NP_414793; COG3039 Transposase and inactivated derivatives, IS5 family X Mobilome: prophages, transposons;}	{GO:0004803; transposase activity; molecular_function GO:0006313; transposition, DNA-mediated; biological_process GO:0003677; DNA binding; molecular_function}	{NA}	{NA}
X39GM001144	{NA}	{NA}	{NA}	{NA}	{NA}
X39GM001189	{kva:Kvar_1610; }	{NA}	{NA}	{NA}	{NA}
X39GM001221	{koe:A225_3773; }	{NA}	{GO:0006066; alcohol metabolic process; biological_process GO:0004026; alcohol O-acetyltransferase activity; molecular_function}	{NA}	{NA}
X39GM001222	{NA}	{NA}	{NA}	{NA}	{NA}
X39GM001226	{NA}	{NA}	{NA}	{NA}	{NA}
X39GM001227	{lax:APT61_03365; }	{YP_003614891; COG4540 Phage P2 baseplate assembly protein gpV X Mobilome: prophages, transposons;}	{NA}	{NA}	{NA}
X39GM001232	{kpo:KPN2242_15170; }	{NA}	{NA}	{NA}	{NA}
X39GM001250	{NA}	{NA}	{GO:0016021; integral to membrane; cellular_component GO:0055085; transmembrane transport; biological_process}	{NA}	{NA}
X39GM001299	{NA}	{NA}	{NA}	{NA}	{NA}
X39GM001334	{NA}	{NA}	{NA}	{NA}	{NA}
X39GM001337	{kvd:KR75_25105; }	{NA}	{NA}	{NA}	{NA}
X39GM001341	{kpb:FH42_07845; }	{NA}	{NA}	{NA}	{NA}
X39GM001342	{NA}	{NA}	{NA}	{NA}	{NA}
X39GM001358	{NA}	{NA}	{NA}	{NA}	{NA}
X39GM001384	{kpe:KPK_1982; }	{NA}	{NA}	{NA}	{NA}
X39GM001417	{NA}	{YP_008851847; COG0282 Acetate kinase C Energy production and conversion ;}	{GO:0006952; defense response; biological_process GO:0016310; phosphorylation; biological_process GO:0005576; NA GO:0005622; intracellular; cellular_component GO:0016301; kinase activity; molecular_function GO:0008152; NA GO:0016774; phosphotransferase activity, carboxyl group as acceptor; molecular_function}	{NA}	{NA}
X39GM001418	{NA}	{NA}	{NA}	{NA}	{NA}
X39GM001420	{kpj:N559_5233; K18767 blaCTX-M beta-lactamase class A CTX-M 3.5.2.6 Human Diseases; Drug resistance; beta-Lactam resistance [PATH:ko01501] }	{YP_004215575; COG2367 Beta-lactamase class A V Defense mechanisms ;}	{GO:0006508; proteolysis; biological_process GO:0009002; serine-type D-Ala-D-Ala carboxypeptidase activity; molecular_function GO:0004359; glutaminase activity; molecular_function GO:0008658; penicillin binding; molecular_function GO:0006541; glutamine metabolic process; biological_process}	{NA}	{ardb_2955; bl2be_ctxm 75 -- monobactam,penicillin,cephalosporin_iii,ceftazidime,cephalosporin_ii,cephalosporin_i bla_a Class A beta-lactamase. This enzyme breaks the beta-lactam antibiotic ring open and deactivates the molecule's antibacterial properites. }
X39GM001421	{ahh:RY45_02970; }	{YP_006912048; COG3385 IS4 transposase X Mobilome: prophages, transposons;}	{GO:0006313; transposition, DNA-mediated; biological_process GO:0004803; transposase activity; molecular_function GO:0003677; DNA binding; molecular_function}	{NA}	{NA}
X39GM001422	{kqv:B8P98_10940; K00932 tdcD propionate kinase 2.7.2.15 Metabolism; Carbohydrate metabolism; Propanoate metabolism [PATH:ko00640] }	{YP_002237855; COG0282 Acetate kinase C Energy production and conversion ;}	{GO:0016301; kinase activity; molecular_function GO:0008152; NA GO:0016774; phosphotransferase activity, carboxyl group as acceptor; molecular_function GO:0016310; phosphorylation; biological_process GO:0005622; intracellular; cellular_component}	{NA}	{NA}
X39GM001449	{kpe:KPK_2045; }	{NA}	{NA}	{NA}	{NA}
X39GM001450	{kpi:D364_11540; K11904 vgrG type VI secretion system secreted protein VgrG -- Environmental Information Processing; Membrane transport; Bacterial secretion system [PATH:ko03070] }	{YP_002237885; COG4253 Uncharacterized conserved protein, DUF2345 family S Function unknown ;}	{GO:0016012; sarcoglycan complex; cellular_component GO:0016021; integral to membrane; cellular_component}	{VFG035209; CVF734 SCI-I T6SS EC55989_3331 hypothetical protein - - - -}	{NA}
X39GM001451	{kpz:KPNIH27_28885; }	{NA}	{NA}	{NA}	{NA}
X39GM001452	{NA}	{NA}	{NA}	{NA}	{NA}
X39GM001453	{NA}	{NA}	{NA}	{NA}	{NA}
X39GM001454	{NA}	{NA}	{NA}	{NA}	{NA}
X39GM001455	{NA}	{NA}	{NA}	{NA}	{NA}
X39GM001456	{NA}	{NA}	{NA}	{NA}	{NA}
X39GM001457	{ppr:PBPRA1584; }	{YP_129797; COG1112 Superfamily I DNA and/or RNA helicase L Replication, recombination and repair ;}	{GO:0008026; ATP-dependent helicase activity; molecular_function GO:0003676; nucleic acid binding; molecular_function GO:0016887; ATPase activity; molecular_function GO:0016020; membrane; cellular_component GO:0009103; lipopolysaccharide biosynthetic process; biological_process GO:0016787; hydrolase activity; molecular_function GO:0016773; phosphotransferase activity, alcohol group as acceptor; m…	{NA}	{NA}
X39GM001458	{kpe:KPK_A0015; K07497 K07497 putative transposase -- }	{YP_002235741; COG2963 Transposase and inactivated derivatives X Mobilome: prophages, transposons;}	{GO:0043565; sequence-specific DNA binding; molecular_function GO:0019069; viral capsid assembly; biological_process GO:0006355; regulation of transcription, DNA-dependent; biological_process GO:0004803; transposase activity; molecular_function GO:0003700; sequence-specific DNA binding transcription factor activity; molecular_function GO:0006310; DNA recombination; biological_process GO:0005524; …	{VFG014114; CVF520 LPS O-antigen (P_ aeruginosa) PA3144 hypothetical protein - - - -}	{NA}
X39GM001459	{kpe:KPK_A0016; K07497 K07497 putative transposase -- }	{YP_002235668; COG2801 Transposase InsO and inactivated derivatives X Mobilome: prophages, transposons;}	{GO:0015074; DNA integration; biological_process}	{NA}	{NA}
X39GM001460	{NA}	{NA}	{NA}	{NA}	{NA}
X39GM001461	{NA}	{NA}	{NA}	{NA}	{NA}
X39GM001462	{kin:AB182_13580; }	{YP_007872993; COG0582 Integrase LX Replication, recombination and repair ; Mobilome: prophages, transposons;}	{GO:0015074; DNA integration; biological_process GO:0031110; regulation of microtubule polymerization or depolymerization; biological_process GO:0006310; DNA recombination; biological_process GO:0003677; DNA binding; molecular_function}	{NA}	{NA}
X39GM001480	{koc:AB185_18705; }	{NA}	{NA}	{NA}	{NA}
X39GM001507	{kpe:KPK_2112; }	{NA}	{NA}	{NA}	{NA}
X39GM001516	{kqu:AVR78_20055; }	{NA}	{NA}	{NA}	{NA}
X39GM001565	{kpe:KPK_2179; }	{NA}	{NA}	{NA}	{NA}
X39GM001597	{NA}	{NA}	{NA}	{NA}	{NA}
X39GM001611	{NA}	{NP_615747; COG1126 ABC-type polar amino acid transport system, ATPase component E Amino acid transport and metabolism ;}	{GO:0007186; G-protein coupled receptor protein signaling pathway; biological_process GO:0006355; regulation of transcription, DNA-dependent; biological_process GO:0031683; G-protein beta/gamma-subunit complex binding; molecular_function GO:0005524; ATP binding; molecular_function GO:0098519; NA GO:0016021; integral to membrane; cellular_component GO:0008152; NA GO:0006810; transport; biological_…	{NA}	{NA}
X39GM001612	{kpk:A593_25540; K02028 ABC.PA.A polar amino acid transport system ATP-binding protein 3.6.3.21 }	{YP_002238063; COG1126 ABC-type polar amino acid transport system, ATPase component E Amino acid transport and metabolism ;}	{GO:0016887; ATPase activity; molecular_function GO:0005524; ATP binding; molecular_function}	{NA}	{NA}
X39GM001636	{NA}	{NA}	{NA}	{NA}	{NA}
X39GM001637	{NA}	{NA}	{NA}	{NA}	{NA}
X39GM001641	{NA}	{NA}	{NA}	{NA}	{NA}
X39GM001644	{NA}	{NA}	{NA}	{NA}	{NA}
X39GM001666	{fln:FLA_3144; }	{NA}	{NA}	{NA}	{NA}
X39GM001667	{NA}	{NA}	{NA}	{NA}	{NA}
X39GM001668	{NA}	{NA}	{NA}	{NA}	{NA}
X39GM001681	{kok:KONIH1_11585; }	{NA}	{NA}	{NA}	{NA}
X39GM001682	{cfd:CFNIH1_20045; }	{YP_006218274; COG1359 Quinol monooxygenase YgiN C Energy production and conversion ;}	{NA}	{NA}	{NA}
X39GM001703	{NA}	{NA}	{NA}	{NA}	{NA}
X39GM001709	{kpe:KPK_2332; }	{NA}	{NA}	{NA}	{NA}
X39GM001716	{ses:SARI_02626; K11904 vgrG type VI secretion system secreted protein VgrG -- Environmental Information Processing; Membrane transport; Bacterial secretion system [PATH:ko03070] }	{YP_003537470; COG4253 Uncharacterized conserved protein, DUF2345 family S Function unknown ;}	{NA}	{VFG045807; CVF734 SCI-I T6SS EC958_3091 hypothetical protein - - - -}	{NA}
X39GM001717	{cama:F384_11175; }	{YP_003210311; COG1070 Sugar (pentulose or hexulose) kinase G Carbohydrate transport and metabolism ;}	{GO:0016998; cell wall macromolecule catabolic process; biological_process GO:0006032; chitin catabolic process; biological_process GO:0005509; calcium ion binding; molecular_function GO:0004568; chitinase activity; molecular_function}	{NA}	{NA}
X39GM001718	{cama:F384_11225; }	{NA}	{GO:0042393; histone binding; molecular_function}	{NA}	{NA}
X39GM001719	{NA}	{NA}	{GO:0005509; calcium ion binding; molecular_function}	{NA}	{NA}
X39GM001722	{NA}	{NA}	{NA}	{NA}	{NA}
X39GM001723	{kpo:KPN2242_12945; }	{NA}	{NA}	{NA}	{NA}
X39GM001730	{kva:Kvar_2306; }	{NA}	{NA}	{NA}	{NA}
X39GM001799	{kpa:KPNJ1_02544; }	{NA}	{NA}	{NA}	{NA}
X39GM001834	{NA}	{NA}	{NA}	{NA}	{NA}
X39GM001854	{NA}	{YP_008849643; COG5013 Nitrate reductase alpha subunit CP Energy production and conversion ; Inorganic ion transport and metabolism ;}	{GO:0055114; oxidation-reduction process; biological_process GO:0030151; molybdenum ion binding; molecular_function GO:0016491; oxidoreductase activity; molecular_function}	{NA}	{NA}
X39GM001873	{kpk:A593_24180; K19163 ccdB toxin CcdB -- }	{NA}	{GO:0008657; DNA topoisomerase (ATP-hydrolyzing) inhibitor activity; molecular_function GO:0006276; plasmid maintenance; biological_process}	{NA}	{NA}
X39GM001898	{NA}	{NA}	{NA}	{NA}	{NA}
X39GM001899	{NA}	{NA}	{NA}	{NA}	{NA}
X39GM001900	{NA}	{NA}	{NA}	{NA}	{NA}
X39GM001902	{kva:Kvar_2468; }	{NA}	{NA}	{NA}	{NA}
X39GM001904	{kpe:KPK_2523; }	{NA}	{NA}	{NA}	{NA}
X39GM001931	{NA}	{NA}	{NA}	{NA}	{NA}
X39GM001935	{NA}	{NA}	{NA}	{NA}	{NA}
X39GM001939	{kpb:FH42_05020; }	{NA}	{NA}	{NA}	{NA}
X39GM001940	{kvq:SP68_02555; }	{NA}	{NA}	{NA}	{NA}
X39GM001958	{kvq:SP68_02450; }	{NA}	{NA}	{NA}	{NA}
X39GM001963	{kom:HR38_00600; }	{NA}	{NA}	{NA}	{NA}
X39GM001964	{ear:CCG30422; K11250 leuE leucine efflux protein -- }	{NP_416312; COG1280 Threonine/homoserine/homoserine lactone efflux protein E Amino acid transport and metabolism ;}	{GO:0016021; integral to membrane; cellular_component GO:0016020; membrane; cellular_component GO:0006865; amino acid transport; biological_process}	{NA}	{NA}
X39GM001968	{kpe:KPK_2592; }	{NA}	{NA}	{NA}	{NA}
X39GM002003	{kva:Kvar_2571; }	{NA}	{NA}	{NA}	{NA}
X39GM002032	{NA}	{NA}	{GO:0005789; endoplasmic reticulum membrane; cellular_component GO:0016746; transferase activity, transferring acyl groups; molecular_function GO:0016021; integral to membrane; cellular_component GO:0006506; GPI anchor biosynthetic process; biological_process GO:0045444; fat cell differentiation; biological_process}	{NA}	{NA}
X39GM002033	{kpb:FH42_04660; K06971 K06971 uncharacterized protein -- }	{YP_002238483; COG0434 Predicted TIM-barrel enzyme R General function prediction only ;}	{GO:0006568; tryptophan metabolic process; biological_process GO:0004834; tryptophan synthase activity; molecular_function}	{NA}	{NA}
X39GM002039	{NA}	{NA}	{GO:0007186; G-protein coupled receptor protein signaling pathway; biological_process GO:0016021; integral to membrane; cellular_component GO:0004930; G-protein coupled receptor activity; molecular_function}	{NA}	{NA}
X39GM002040	{yep:YE105_C2162; }	{NA}	{NA}	{NA}	{NA}
X39GM002041	{yet:CH48_3801; }	{NA}	{GO:0006412; translation; biological_process GO:0006281; DNA repair; biological_process GO:0046872; metal ion binding; molecular_function GO:0005840; ribosome; cellular_component GO:0005515; protein binding; molecular_function GO:0008270; zinc ion binding; molecular_function GO:0003676; nucleic acid binding; molecular_function GO:0006260; DNA replication; biological_process GO:0004519; endonuclea…	{NA}	{NA}
X39GM002042	{pge:LG71_16895; }	{NA}	{NA}	{NA}	{NA}
X39GM002057	{kvq:SP68_01965; }	{YP_002238507; COG0406 Broad specificity phosphatase PhoE G Carbohydrate transport and metabolism ;}	{NA}	{NA}	{NA}
X39GM002068	{kpe:KPK_2689; }	{NA}	{GO:0006955; immune response; biological_process GO:0000902; cell morphogenesis; biological_process GO:0016020; membrane; cellular_component}	{NA}	{NA}
X39GM002176	{NA}	{NA}	{NA}	{NA}	{NA}
X39GM002201	{kpe:KPK_2884; }	{NA}	{NA}	{NA}	{NA}
X39GM002203	{kpk:A593_22425; }	{NA}	{NA}	{NA}	{NA}
X39GM002205	{kpe:KPK_2887; }	{NA}	{NA}	{NA}	{NA}
X39GM002206	{kpe:KPK_2888; }	{NA}	{NA}	{NA}	{NA}
X39GM002207	{NA}	{NA}	{NA}	{NA}	{NA}
X39GM002229	{NA}	{NA}	{NA}	{NA}	{NA}
X39GM002233	{kpnu:LI86_11035; }	{NA}	{NA}	{NA}	{NA}
X39GM002253	{kpe:KPK_2930; }	{NA}	{NA}	{NA}	{NA}
X39GM002259	{kpk:A593_22155; }	{NA}	{NA}	{NA}	{NA}
X39GM002260	{NA}	{NA}	{NA}	{NA}	{NA}
X39GM002322	{NA}	{NA}	{NA}	{NA}	{NA}
X39GM002344	{kpa:KPNJ1_03044; }	{YP_002238851; COG3042 Putative hemolysin R General function prediction only ;}	{NA}	{NA}	{NA}
X39GM002380	{kpk:A593_21550; }	{YP_002346499; COG4104 Zn-binding Pro-Ala-Ala-Arg (PAAR) domain, incolved in TypeVI secretion U Intracellular trafficking, secretion, and vesicular transport ;}	{NA}	{NA}	{NA}
X39GM002383	{NA}	{NA}	{NA}	{NA}	{NA}
X39GM002384	{eclo:ENC_09010; }	{NA}	{NA}	{NA}	{NA}
X39GM002385	{eclo:ENC_09000; }	{NA}	{NA}	{NA}	{NA}
X39GM002401	{kpp:A79E_2848; }	{NA}	{NA}	{NA}	{NA}
X39GM002457	{kpi:D364_06660; }	{NA}	{NA}	{NA}	{NA}
X39GM002459	{NA}	{NA}	{NA}	{NA}	{NA}
X39GM002460	{gqu:AWC35_24345; K04062 osmB osmotically inducible lipoprotein OsmB -- }	{NA}	{GO:0046999; regulation of conjugation; biological_process GO:0019867; outer membrane; cellular_component}	{NA}	{NA}
X39GM002473	{kpa:KPNJ1_03236; }	{NA}	{NA}	{NA}	{NA}
X39GM002477	{kpn:KPN_01263; }	{YP_003613628; COG4104 Zn-binding Pro-Ala-Ala-Arg (PAAR) domain, incolved in TypeVI secretion U Intracellular trafficking, secretion, and vesicular transport ;}	{NA}	{NA}	{NA}
X39GM002478	{kpn:KPN_01262; }	{NA}	{NA}	{NA}	{NA}
X39GM002479	{kpn:KPN_01261; }	{NA}	{NA}	{NA}	{NA}
X39GM002480	{NA}	{NA}	{NA}	{NA}	{NA}
X39GM002485	{NA}	{NA}	{NA}	{NA}	{NA}
X39GM002497	{kpe:KPK_3190; }	{NA}	{NA}	{NA}	{NA}
X39GM002501	{NA}	{NA}	{NA}	{NA}	{NA}
X39GM002543	{NA}	{NA}	{NA}	{NA}	{NA}
X39GM002583	{NA}	{NA}	{NA}	{NA}	{NA}
X39GM002584	{kpk:A593_20550; }	{YP_002239105; COG0654 2-polyprenyl-6-methoxyphenol hydroxylase and related FAD-dependent oxidoreductases HC Coenzyme transport and metabolism ; Energy production and conversion ;}	{NA}	{NA}	{NA}
X39GM002586	{kpe:KPK_3282; }	{NA}	{NA}	{NA}	{NA}
X39GM002602	{kpb:FH42_01725; }	{YP_004682611; COG3344 Retron-type reverse transcriptase X Mobilome: prophages, transposons;}	{GO:0003723; RNA binding; molecular_function GO:0006278; RNA-dependent DNA replication; biological_process GO:0003964; RNA-directed DNA polymerase activity; molecular_function}	{NA}	{NA}
X39GM002629	{kpe:KPK_3330; }	{NA}	{NA}	{NA}	{NA}
X39GM002641	{NA}	{NA}	{NA}	{NA}	{NA}
X39GM002648	{kpe:KPK_3351; }	{NA}	{NA}	{NA}	{NA}
X39GM002651	{kox:KOX_17810; }	{NA}	{GO:0016020; membrane; cellular_component GO:0007165; signal transduction; biological_process GO:0004888; transmembrane receptor activity; molecular_function GO:0006935; chemotaxis; biological_process}	{NA}	{NA}
X39GM002656	{srl:SOD_c35970; }	{YP_008161367; COG4723 Phage-related protein, tail component X Mobilome: prophages, transposons;}	{NA}	{NA}	{NA}
X39GM002675	{NA}	{NA}	{NA}	{NA}	{NA}
X39GM002676	{NA}	{NA}	{NA}	{NA}	{NA}
X39GM002682	{kvq:SP68_24355; }	{NA}	{NA}	{NA}	{NA}
X39GM002687	{kpb:FH42_01725; }	{YP_004682611; COG3344 Retron-type reverse transcriptase X Mobilome: prophages, transposons;}	{GO:0006278; RNA-dependent DNA replication; biological_process GO:0003964; RNA-directed DNA polymerase activity; molecular_function GO:0003723; RNA binding; molecular_function}	{NA}	{NA}
X39GM002688	{NA}	{NA}	{NA}	{NA}	{NA}
X39GM002689	{eoi:ECO111_p2-092; }	{NA}	{NA}	{NA}	{NA}
X39GM002690	{ent:Ent638_2259; }	{YP_001453462; COG1349 DNA-binding transcriptional regulator of sugar metabolism, DeoR/GlpR family KG Transcription ; Carbohydrate transport and metabolism ;}	{GO:0003677; DNA binding; molecular_function GO:0005622; intracellular; cellular_component GO:0006276; plasmid maintenance; biological_process GO:0003700; sequence-specific DNA binding transcription factor activity; molecular_function GO:0009289; pilus; cellular_component GO:0043565; sequence-specific DNA binding; molecular_function GO:0006355; regulation of transcription, DNA-dependent; biologic…	{NA}	{NA}
X39GM002797	{kpa:KPNJ1_03477; K06217 phoH, phoL phosphate starvation-inducible protein PhoH and related proteins -- }	{YP_002239330; COG1702 Phosphate starvation-inducible protein PhoH, predicted ATPase T Signal transduction mechanisms ;}	{GO:0003676; nucleic acid binding; molecular_function GO:0008026; ATP-dependent helicase activity; molecular_function GO:0005524; ATP binding; molecular_function GO:0003677; DNA binding; molecular_function GO:0016787; hydrolase activity; molecular_function GO:0004003; ATP-dependent DNA helicase activity; molecular_function}	{NA}	{NA}
X39GM002814	{NA}	{NA}	{NA}	{NA}	{NA}
X39GM002816	{kvd:KR75_17320; }	{NA}	{NA}	{NA}	{NA}
X39GM002832	{NA}	{NA}	{GO:0006810; transport; biological_process GO:0005215; NA GO:0016020; membrane; cellular_component}	{NA}	{NA}
X39GM002833	{NA}	{NA}	{GO:0016020; membrane; cellular_component GO:0005215; NA GO:0006810; transport; biological_process}	{NA}	{NA}
X39GM002834	{kpe:KPK_3546; K03451 TC.BCT betaine/carnitine transporter, BCCT family -- }	{YP_002239367; COG1292 Choline-glycine betaine transporter M Cell wall/membrane/envelope biogenesis ;}	{GO:0005215; NA GO:0006810; transport; biological_process GO:0016020; membrane; cellular_component}	{NA}	{NA}
X39GM002836	{kvd:KR75_17230; K00135 gabD succinate-semialdehyde dehydrogenase / glutarate-semialdehyde dehydrogenase 1.2.1.16 1.2.1.79 1.2.1.20 Metabolism; Amino acid metabolism; Alanine, aspartate and glutamate metabolism [PATH:ko00250] Metabolism; Amino acid metabolism; Lysine degradation [PATH:ko00310] Metabolism; Amino acid metabolism; Tyrosine metabolism [PATH:ko00350] Metabolism; Carbohydrate metabolis…	{YP_002239369; COG1012 Acyl-CoA reductase or other NAD-dependent aldehyde dehydrogenase C Energy production and conversion ;}	{GO:0055114; oxidation-reduction process; biological_process GO:0008152; NA GO:0016491; oxidoreductase activity; molecular_function}	{NA}	{NA}
X39GM002926	{kpk:A593_19110; K16012 cydC ATP-binding cassette, subfamily C, bacterial CydC -- Environmental Information Processing; Membrane transport; ABC transporters [PATH:ko02010] }	{YP_002239462; COG4987 ABC-type transport system involved in cytochrome bd biosynthesis, fused ATPase and permease components CO Energy production and conversion ; Posttranslational modification, protein turnover, chaperones ;}	{GO:0005524; ATP binding; molecular_function GO:0016021; integral to membrane; cellular_component GO:0042626; ATPase activity, coupled to transmembrane movement of substances; molecular_function GO:0006810; transport; biological_process GO:0055085; transmembrane transport; biological_process}	{NA}	{NA}
X39GM002927	{kpk:A593_19110; K16012 cydC ATP-binding cassette, subfamily C, bacterial CydC -- Environmental Information Processing; Membrane transport; ABC transporters [PATH:ko02010] }	{YP_002239462; COG4987 ABC-type transport system involved in cytochrome bd biosynthesis, fused ATPase and permease components CO Energy production and conversion ; Posttranslational modification, protein turnover, chaperones ;}	{GO:0003724; RNA helicase activity; molecular_function GO:0007059; chromosome segregation; biological_process GO:0003924; GTPase activity; molecular_function GO:0016887; ATPase activity; molecular_function GO:0003723; RNA binding; molecular_function GO:0051301; cell division; biological_process GO:0016021; integral to membrane; cellular_component GO:0005525; GTP binding; molecular_function GO:000…	{VFG013252; CVF494 LOS msbA ABC transporter ATP-binding protein MsbA Biosynthesis pathway of LOS is producing a branched oligosaccharide attached to a lipid A via two 3-deoxy-D-manno-2-octulosonic acid (KDO) molecules. The rfaC gene product adds the first heptose (Hep I) to KDO. The rfaF gene product adds the second Hep onto Hep I and is required for <alpha>-chain elongation. The lgtF gene produc…	{NA}
X39GM002930	{NA}	{NA}	{NA}	{NA}	{NA}
X39GM002937	{NA}	{NA}	{NA}	{NA}	{NA}
X39GM002966	{kpe:KPK_3681; K10678 nfsA nitroreductase 1.-.-.- Metabolism; Xenobiotics biodegradation and metabolism; Nitrotoluene degradation [PATH:ko00633] }	{YP_002239500; COG0778 Nitroreductase C Energy production and conversion ;}	{NA}	{NA}	{NA}
X39GM002967	{kpg:KPNIH32_09170; }	{NA}	{NA}	{NA}	{NA}
X39GM002968	{NA}	{NA}	{GO:0016491; oxidoreductase activity; molecular_function}	{NA}	{NA}
X39GM002980	{NA}	{NA}	{NA}	{NA}	{NA}
X39GM002981	{NA}	{NA}	{NA}	{NA}	{NA}
X39GM002982	{NA}	{NA}	{NA}	{NA}	{NA}
X39GM002983	{kpa:KPNJ1_03112; }	{NA}	{NA}	{NA}	{NA}
X39GM002984	{NA}	{NA}	{NA}	{NA}	{NA}
X39GM002985	{NA}	{NA}	{NA}	{NA}	{NA}
X39GM002986	{kpa:KPNJ1_03114; }	{NA}	{NA}	{NA}	{NA}
X39GM002987	{kpa:KPNJ1_03115; }	{YP_004215715; COG3299 Uncharacterized phage protein gp47/JayE X Mobilome: prophages, transposons;}	{NA}	{NA}	{NA}
X39GM002988	{kpa:KPNJ1_03116; }	{NA}	{NA}	{NA}	{NA}
X39GM002989	{kqv:B8P98_18975; }	{YP_003211778; COG4540 Phage P2 baseplate assembly protein gpV X Mobilome: prophages, transposons;}	{NA}	{NA}	{NA}
X39GM002990	{kln:LH22_17135; }	{NA}	{GO:0051262; protein tetramerization; biological_process GO:0015031; protein transport; biological_process GO:0051082; unfolded protein binding; molecular_function}	{NA}	{NA}
X39GM002991	{kln:LH22_17140; }	{NA}	{GO:0000139; Golgi membrane; cellular_component GO:0005737; cytoplasm; cellular_component GO:0006886; intracellular protein transport; biological_process GO:0048280; vesicle fusion with Golgi apparatus; biological_process}	{NA}	{NA}
X39GM002992	{smw:SMWW4_v1c19530; }	{NA}	{NA}	{NA}	{NA}
X39GM002993	{kqv:B8P98_18985; }	{NA}	{NA}	{NA}	{NA}
X39GM002994	{kpv:KPNIH29_06605; }	{NA}	{NA}	{NA}	{NA}
X39GM002995	{kpv:KPNIH29_06600; }	{NA}	{NA}	{NA}	{NA}
X39GM002996	{kpv:KPNIH29_06595; }	{NA}	{NA}	{NA}	{NA}
X39GM002997	{kpv:KPNIH29_06590; }	{YP_004215707; COG5283 Phage-related tail protein X Mobilome: prophages, transposons;}	{NA}	{NA}	{NA}
X39GM002998	{kpv:KPNIH29_06585; }	{NA}	{NA}	{NA}	{NA}
X39GM002999	{kpv:KPNIH29_06580; }	{NA}	{NA}	{NA}	{NA}
X39GM003000	{kpv:KPNIH29_06575; }	{NA}	{NA}	{NA}	{NA}
X39GM003001	{kpv:KPNIH29_06570; }	{NA}	{NA}	{NA}	{NA}
X39GM003002	{kpv:KPNIH29_06565; }	{NA}	{NA}	{NA}	{NA}
X39GM003003	{kpv:KPNIH29_06560; }	{NA}	{NA}	{NA}	{NA}
X39GM003004	{kpv:KPNIH29_06555; }	{NA}	{GO:0030089; phycobilisome; cellular_component GO:0015979; photosynthesis; biological_process}	{NA}	{NA}
X39GM003005	{kpa:KPNJ1_03134; }	{NA}	{NA}	{NA}	{NA}
X39GM003006	{kpa:KPNJ1_03135; }	{NA}	{GO:0007049; cell cycle; biological_process}	{NA}	{NA}
X39GM003007	{kpv:KPNIH29_06540; }	{YP_004215698; COG4834 Uncharacterized protein S Function unknown ;}	{GO:0009288; bacterial-type flagellum; cellular_component GO:0006928; cellular component movement; biological_process GO:0044781; NA}	{NA}	{NA}
X39GM003009	{pstw:DSJ_16840; }	{NA}	{GO:0003677; DNA binding; molecular_function}	{NA}	{NA}
X39GM003010	{NA}	{NA}	{NA}	{NA}	{NA}
X39GM003011	{koe:A225_1433; }	{YP_003211778; COG4540 Phage P2 baseplate assembly protein gpV X Mobilome: prophages, transposons;}	{NA}	{NA}	{NA}
X39GM003012	{pstw:DSJ_10095; }	{NA}	{NA}	{NA}	{NA}
X39GM003013	{pstw:DSJ_10090; }	{NA}	{NA}	{NA}	{NA}
X39GM003014	{koe:A225_1430; }	{NA}	{NA}	{NA}	{NA}
X39GM003015	{kpa:KPNJ1_03123; }	{NA}	{NA}	{NA}	{NA}
X39GM003016	{ecg:E2348C_3895; }	{NA}	{NA}	{NA}	{NA}
X39GM003017	{pstw:DSJ_01510; K06919 K06919 putative DNA primase/helicase -- }	{YP_003712786; COG4643 Uncharacterized domain associated with phage/plasmid primase X Mobilome: prophages, transposons;}	{NA}	{NA}	{NA}
X39GM003018	{eclz:LI64_03970; }	{NA}	{NA}	{NA}	{NA}
X39GM003019	{kqu:AVR78_10875; }	{NA}	{NA}	{NA}	{NA}
X39GM003020	{kqu:AVR78_10865; }	{NA}	{GO:0004519; endonuclease activity; molecular_function}	{NA}	{NA}
X39GM003021	{enl:A3UG_04575; }	{YP_002235819; COG0582 Integrase LX Replication, recombination and repair ; Mobilome: prophages, transposons;}	{GO:0015074; DNA integration; biological_process GO:0006310; DNA recombination; biological_process GO:0003677; DNA binding; molecular_function}	{NA}	{NA}
X39GM003022	{NA}	{NA}	{NA}	{NA}	{NA}
X39GM003024	{NA}	{NA}	{GO:0003774; motor activity; molecular_function GO:0016459; myosin complex; cellular_component GO:0005524; ATP binding; molecular_function}	{NA}	{NA}
X39GM003025	{ypq:DJ40_1322; }	{YP_006282811; COG0582 Integrase LX Replication, recombination and repair ; Mobilome: prophages, transposons;}	{GO:0003677; DNA binding; molecular_function GO:0006310; DNA recombination; biological_process GO:0015074; DNA integration; biological_process}	{NA}	{NA}
X39GM003026	{kpa:KPNJ1_03136; }	{YP_004215698; COG4834 Uncharacterized protein S Function unknown ;}	{NA}	{NA}	{NA}
X39GM003027	{kpa:KPNJ1_03137; }	{NA}	{NA}	{NA}	{NA}
X39GM003028	{kpa:KPNJ1_03138; K09960 K09960 uncharacterized protein -- }	{YP_004215696; COG3566 Uncharacterized protein S Function unknown ;}	{NA}	{NA}	{NA}
X39GM003029	{kpv:KPNIH29_06525; }	{YP_004215695; COG2369 Uncharacterized conserved protein, contains phage Mu gpF-like domain S Function unknown ;}	{NA}	{NA}	{NA}
X39GM003030	{kpa:KPNJ1_03140; K09961 K09961 uncharacterized protein -- }	{YP_004215694; COG3567 Uncharacterized protein S Function unknown ;}	{NA}	{NA}	{NA}
X39GM003031	{kpv:KPNIH29_06515; K06909 xtmB phage terminase large subunit -- }	{YP_008971040; COG1783 Phage terminase large subunit X Mobilome: prophages, transposons;}	{GO:0006323; DNA packaging; biological_process}	{NA}	{NA}
X39GM003032	{kpv:KPNIH29_06510; }	{NA}	{GO:0006352; transcription initiation, DNA-dependent; biological_process GO:0003700; sequence-specific DNA binding transcription factor activity; molecular_function GO:0003677; DNA binding; molecular_function GO:0016987; sigma factor activity; molecular_function GO:0006355; regulation of transcription, DNA-dependent; biological_process}	{NA}	{NA}
X39GM003033	{kpv:KPNIH29_10270; }	{NA}	{NA}	{NA}	{NA}
X39GM003036	{eae:EAE_21115; }	{NA}	{NA}	{NA}	{NA}
X39GM003040	{kox:KOX_15425; }	{YP_008849334; COG0484 DnaJ-class molecular chaperone with C-terminal Zn finger domain O Posttranslational modification, protein turnover, chaperones ;}	{GO:0006464; protein modification process; biological_process GO:0006355; regulation of transcription, DNA-dependent; biological_process GO:0051082; unfolded protein binding; molecular_function GO:0031072; heat shock protein binding; molecular_function GO:0016151; nickel ion binding; molecular_function GO:0003677; DNA binding; molecular_function}	{NA}	{NA}
X39GM003041	{kgo:CEW81_05955; }	{NA}	{NA}	{NA}	{NA}
X39GM003044	{kox:KOX_15375; }	{NA}	{GO:0004386; helicase activity; molecular_function GO:0003911; DNA ligase (NAD+) activity; molecular_function GO:0006281; DNA repair; biological_process GO:0008270; zinc ion binding; molecular_function GO:0003896; DNA primase activity; molecular_function GO:0006260; DNA replication; biological_process}	{NA}	{NA}
X39GM003045	{kpv:KPNIH29_06440; }	{NA}	{NA}	{NA}	{NA}
X39GM003046	{kpv:KPNIH29_06435; }	{NA}	{NA}	{NA}	{NA}
X39GM003047	{kpv:KPNIH29_06425; }	{NA}	{GO:0003700; sequence-specific DNA binding transcription factor activity; molecular_function GO:0005634; nucleus; cellular_component GO:0006355; regulation of transcription, DNA-dependent; biological_process}	{NA}	{NA}
X39GM003048	{cnt:JT31_02000; }	{NA}	{GO:0016987; sigma factor activity; molecular_function GO:0003677; DNA binding; molecular_function GO:0003700; sequence-specific DNA binding transcription factor activity; molecular_function GO:0006352; transcription initiation, DNA-dependent; biological_process GO:0006355; regulation of transcription, DNA-dependent; biological_process GO:0043565; sequence-specific DNA binding; molecular_function…	{NA}	{NA}
X39GM003049	{kpv:KPNIH29_06410; }	{NA}	{NA}	{NA}	{NA}
X39GM003050	{kpv:KPNIH29_06405; }	{NA}	{NA}	{NA}	{NA}
X39GM003051	{kpv:KPNIH29_06400; }	{NA}	{NA}	{NA}	{NA}
X39GM003052	{caf:AL524_11890; }	{NA}	{GO:0003677; DNA binding; molecular_function GO:0003887; DNA-directed DNA polymerase activity; molecular_function GO:0008408; 3'-5' exonuclease activity; molecular_function GO:0006260; DNA replication; biological_process GO:0009360; DNA polymerase III complex; cellular_component}	{NA}	{NA}
X39GM003053	{kpv:KPNIH29_06390; }	{NA}	{NA}	{NA}	{NA}
X39GM003054	{kpi:D364_07545; }	{NA}	{GO:0006629; lipid metabolic process; biological_process}	{NA}	{NA}
X39GM003055	{kok:KONIH1_09365; }	{NA}	{NA}	{NA}	{NA}
X39GM003115	{NA}	{NA}	{NA}	{NA}	{NA}
X39GM003132	{NA}	{NA}	{NA}	{NA}	{NA}
X39GM003145	{kva:Kvar_3594; }	{NA}	{NA}	{NA}	{NA}
X39GM003150	{kpe:KPK_3789; }	{NA}	{NA}	{NA}	{NA}
X39GM003151	{kvq:SP68_22455; }	{NA}	{NA}	{NA}	{NA}
X39GM003160	{kpi:D364_04035; }	{NA}	{NA}	{NA}	{NA}
X39GM003161	{NA}	{NA}	{NA}	{NA}	{NA}
X39GM003162	{senj:CFSAN001992_07510; }	{YP_001453927; COG0561 Hydroxymethylpyrimidine pyrophosphatase and other HAD family phosphatases HR Coenzyme transport and metabolism ; General function prediction only ;}	{GO:0003993; acid phosphatase activity; molecular_function}	{NA}	{NA}
X39GM003163	{cif:AL515_15055; }	{NA}	{NA}	{NA}	{NA}
X39GM003164	{cif:AL515_15050; }	{YP_007875163; COG1961 Site-specific DNA recombinase related to the DNA invertase Pin L Replication, recombination and repair ;}	{GO:0003677; DNA binding; molecular_function GO:0006310; DNA recombination; biological_process GO:0000150; recombinase activity; molecular_function}	{NA}	{NA}
X39GM003165	{ebt:EBL_c26280; }	{NA}	{NA}	{NA}	{NA}
X39GM003166	{ron:TE10_19545; }	{NA}	{NA}	{NA}	{NA}
X39GM003167	{NA}	{NA}	{NA}	{NA}	{NA}
X39GM003168	{ron:TE10_19540; }	{NA}	{NA}	{NA}	{NA}
X39GM003169	{csj:CSK29544_00160; }	{NA}	{NA}	{NA}	{NA}
X39GM003170	{kpk:A593_26180; K07497 K07497 putative transposase -- }	{YP_007872676; COG2801 Transposase InsO and inactivated derivatives X Mobilome: prophages, transposons;}	{GO:0015074; DNA integration; biological_process GO:0016407; acetyltransferase activity; molecular_function}	{VFG014116; CVF520 LPS O-antigen (P_ aeruginosa) PA3142 hypothetical protein - - - -}	{NA}
X39GM003171	{plf:PANA5342_0787; }	{NA}	{NA}	{NA}	{NA}
X39GM003172	{ebi:EbC_36990; K07497 K07497 putative transposase -- }	{YP_006284393; COG0656 Aldo/keto reductase, related to diketogulonate reductase Q Secondary metabolites biosynthesis, transport and catabolism ;}	{GO:0005524; ATP binding; molecular_function GO:0019069; viral capsid assembly; biological_process GO:0006310; DNA recombination; biological_process GO:0003677; DNA binding; molecular_function GO:0000150; recombinase activity; molecular_function GO:0006313; transposition, DNA-mediated; biological_process GO:0004803; transposase activity; molecular_function}	{NA}	{NA}
X39GM003173	{krd:A3780_04685; }	{NA}	{NA}	{NA}	{NA}
X39GM003174	{NA}	{YP_008848327; COG0561 Hydroxymethylpyrimidine pyrophosphatase and other HAD family phosphatases HR Coenzyme transport and metabolism ; General function prediction only ;}	{NA}	{NA}	{NA}
X39GM003204	{kva:Kvar_3637; }	{NA}	{NA}	{NA}	{NA}
X39GM003219	{NA}	{NA}	{GO:0006810; transport; biological_process GO:0005215; NA GO:0016020; membrane; cellular_component}	{NA}	{NA}
X39GM003294	{NA}	{NA}	{NA}	{NA}	{NA}
X39GM003295	{kpe:KPK_3933; }	{NA}	{NA}	{NA}	{NA}
X39GM003317	{kpa:KPNJ1_03960; }	{NA}	{NA}	{NA}	{NA}
X39GM003367	{NA}	{NA}	{NA}	{NA}	{NA}
X39GM003372	{cwe:CO701_02000; K07481 K07481 transposase, IS5 family -- }	{NP_414793; COG3039 Transposase and inactivated derivatives, IS5 family X Mobilome: prophages, transposons;}	{GO:0003677; DNA binding; molecular_function GO:0004803; transposase activity; molecular_function GO:0006313; transposition, DNA-mediated; biological_process}	{NA}	{NA}
X39GM003389	{kva:Kvar_3816; }	{NA}	{NA}	{NA}	{NA}
X39GM003436	{NA}	{NA}	{NA}	{NA}	{NA}
X39GM003469	{NA}	{NA}	{NA}	{NA}	{NA}
X39GM003470	{cfd:CFNIH1_11800; }	{NA}	{NA}	{NA}	{NA}
X39GM003523	{NA}	{NA}	{NA}	{NA}	{NA}
X39GM003535	{NA}	{NA}	{GO:0015099; nickel ion transmembrane transporter activity; molecular_function GO:0016021; integral to membrane; cellular_component GO:0046872; metal ion binding; molecular_function GO:0055085; transmembrane transport; biological_process GO:0015675; nickel ion transport; biological_process GO:0015087; cobalt ion transmembrane transporter activity; molecular_function GO:0006824; cobalt ion transpo…	{NA}	{NA}
X39GM003547	{kpe:KPK_4269; }	{NA}	{NA}	{NA}	{NA}
X39GM003562	{NA}	{NA}	{NA}	{NA}	{NA}
X39GM003609	{kpe:KPK_4332; }	{NA}	{NA}	{NA}	{NA}
X39GM003613	{NA}	{NA}	{NA}	{NA}	{NA}
X39GM003623	{kpa:KPNJ1_04358; }	{NA}	{NA}	{NA}	{NA}
X39GM003650	{NA}	{NA}	{NA}	{NA}	{NA}
X39GM003651	{NA}	{NA}	{NA}	{NA}	{NA}
X39GM003659	{kpe:KPK_4380; }	{NA}	{NA}	{NA}	{NA}
X39GM003680	{NA}	{NA}	{NA}	{NA}	{NA}
X39GM003693	{NA}	{NA}	{GO:0008170; N-methyltransferase activity; molecular_function GO:0003677; DNA binding; molecular_function GO:0006306; DNA methylation; biological_process}	{NA}	{NA}
X39GM003694	{cyq:Q91_1134; K03427 hsdM type I restriction enzyme M protein 2.1.1.72 }	{YP_002249480; COG0286 Type I restriction-modification system, DNA methylase subunit V Defense mechanisms ;}	{GO:0009007; site-specific DNA-methyltransferase (adenine-specific) activity; molecular_function GO:0008170; N-methyltransferase activity; molecular_function GO:0006306; DNA methylation; biological_process GO:0003677; DNA binding; molecular_function GO:0031167; rRNA methylation; biological_process GO:0008168; methyltransferase activity; molecular_function}	{NA}	{NA}
X39GM003695	{NA}	{NA}	{NA}	{NA}	{NA}
X39GM003696	{NA}	{NA}	{GO:0003924; GTPase activity; molecular_function GO:0016887; ATPase activity; molecular_function GO:0005622; intracellular; cellular_component GO:0003735; structural constituent of ribosome; molecular_function GO:0006412; translation; biological_process GO:0005524; ATP binding; molecular_function GO:0005525; GTP binding; molecular_function GO:0005840; ribosome; cellular_component}	{NA}	{NA}
X39GM003697	{van:VAA_01212; K01154 hsdS type I restriction enzyme, S subunit 3.1.21.3 }	{YP_008488684; COG0732 Restriction endonuclease S subunit V Defense mechanisms ;}	{GO:0006304; DNA modification; biological_process GO:0003677; DNA binding; molecular_function}	{NA}	{NA}
X39GM003698	{NA}	{NA}	{NA}	{NA}	{NA}
X39GM003699	{NA}	{NA}	{NA}	{NA}	{NA}
X39GM003700	{mkm:Mkms_3851; }	{NA}	{GO:0006304; DNA modification; biological_process GO:0005234; extracellular-glutamate-gated ion channel activity; molecular_function GO:0003677; DNA binding; molecular_function GO:0003824; NA GO:0016020; membrane; cellular_component GO:0004970; ionotropic glutamate receptor activity; molecular_function}	{NA}	{NA}
X39GM003701	{NA}	{NA}	{GO:0006304; DNA modification; biological_process GO:0003824; NA GO:0003677; DNA binding; molecular_function}	{NA}	{NA}
X39GM003702	{NA}	{NA}	{NA}	{NA}	{NA}
X39GM003703	{bok:DM82_4440; }	{NA}	{GO:0015074; DNA integration; biological_process}	{NA}	{NA}
X39GM003704	{axy:AXYL_04651; }	{NA}	{GO:0007049; cell cycle; biological_process}	{NA}	{NA}
X39GM003705	{NA}	{NA}	{NA}	{NA}	{NA}
X39GM003706	{ahd:AI20_05535; }	{YP_003683727; COG3339 Uncharacterized membrane protein YkvA, DUF1232 family S Function unknown ;}	{NA}	{NA}	{NA}
X39GM003707	{yee:YE5303_05001; }	{NA}	{NA}	{NA}	{NA}
X39GM003709	{yru:BD65_2408; }	{NA}	{NA}	{NA}	{NA}
X39GM003710	{NA}	{NA}	{NA}	{NA}	{NA}
X39GM003711	{NA}	{NA}	{NA}	{NA}	{NA}
X39GM003712	{NA}	{NA}	{NA}	{NA}	{NA}
X39GM003713	{kpe:KPK_A0015; K07497 K07497 putative transposase -- }	{YP_002235741; COG2963 Transposase and inactivated derivatives X Mobilome: prophages, transposons;}	{GO:0000150; recombinase activity; molecular_function GO:0006313; transposition, DNA-mediated; biological_process GO:0003677; DNA binding; molecular_function GO:0007049; cell cycle; biological_process GO:0005524; ATP binding; molecular_function GO:0004803; transposase activity; molecular_function GO:0006310; DNA recombination; biological_process GO:0003700; sequence-specific DNA binding transcrip…	{VFG014114; CVF520 LPS O-antigen (P_ aeruginosa) PA3144 hypothetical protein - - - -}	{NA}
X39GM003714	{kpe:KPK_A0016; K07497 K07497 putative transposase -- }	{YP_002235668; COG2801 Transposase InsO and inactivated derivatives X Mobilome: prophages, transposons;}	{GO:0015074; DNA integration; biological_process}	{NA}	{NA}
X39GM003717	{cif:AL515_17690; }	{YP_008160692; COG2378 Predicted DNA-binding transcriptional regulator YafY, contains an HTH and WYL domains K Transcription ;}	{GO:0003677; DNA binding; molecular_function GO:0003700; sequence-specific DNA binding transcription factor activity; molecular_function GO:0005622; intracellular; cellular_component GO:0006355; regulation of transcription, DNA-dependent; biological_process}	{NA}	{NA}
X39GM003718	{yee:YE5303_05181; }	{NA}	{NA}	{NA}	{NA}
X39GM003720	{sry:M621_19625; }	{NA}	{NA}	{NA}	{NA}
X39GM003722	{ecm:EcSMS35_0308; K03630 radC DNA repair protein RadC -- }	{NP_417131; COG2003 DNA repair protein RadC, contains a helix-hairpin-helix DNA-binding motif L Replication, recombination and repair ;}	{NA}	{NA}	{NA}
X39GM003725	{hav:AT03_17075; K18837 cbtA cytoskeleton-binding toxin CbtA and related proteins -- }	{NA}	{NA}	{NA}	{NA}
X39GM003726	{NA}	{NA}	{GO:0006355; regulation of transcription, DNA-dependent; biological_process GO:0003677; DNA binding; molecular_function GO:0006352; transcription initiation, DNA-dependent; biological_process GO:0003700; sequence-specific DNA binding transcription factor activity; molecular_function GO:0016987; sigma factor activity; molecular_function}	{NA}	{NA}
X39GM003732	{NA}	{NA}	{GO:0016021; integral to membrane; cellular_component}	{NA}	{NA}
X39GM003733	{NA}	{NA}	{NA}	{NA}	{NA}
X39GM003734	{NA}	{NA}	{NA}	{NA}	{NA}
X39GM003735	{kqv:B8P98_06360; }	{NA}	{NA}	{NA}	{NA}
X39GM003736	{NA}	{NA}	{NA}	{NA}	{NA}
X39GM003737	{NA}	{NA}	{NA}	{NA}	{NA}
X39GM003739	{kvd:KR75_02410; }	{NA}	{NA}	{NA}	{NA}
X39GM003740	{ses:SARI_02621; K07497 K07497 putative transposase -- }	{NA}	{NA}	{NA}	{NA}
X39GM003741	{eclx:LI66_11820; }	{NA}	{NA}	{NA}	{NA}
X39GM003742	{ebt:EBL_c11980; }	{NA}	{NA}	{NA}	{NA}
X39GM003743	{ebt:EBL_c11860; }	{NA}	{NA}	{NA}	{NA}
X39GM003748	{NA}	{NA}	{GO:0005515; protein binding; molecular_function}	{NA}	{NA}
X39GM003755	{kpa:KPNJ1_04469; K11926 crl sigma factor-binding protein Crl -- }	{NA}	{GO:0045893; positive regulation of transcription, DNA-dependent; biological_process GO:0005737; cytoplasm; cellular_component}	{NA}	{NA}
X39GM003772	{NA}	{NA}	{NA}	{NA}	{NA}
X39GM003788	{NA}	{NA}	{NA}	{NA}	{NA}
X39GM003793	{kpe:KPK_4524; K06080 rcsF RcsF protein -- Environmental Information Processing; Signal transduction; Two-component system [PATH:ko02020] }	{NA}	{NA}	{NA}	{NA}
X39GM003888	{NA}	{NA}	{NA}	{NA}	{NA}
X39GM003925	{NA}	{NA}	{NA}	{NA}	{NA}
X39GM003930	{NA}	{NA}	{NA}	{NA}	{NA}
X39GM003975	{NA}	{NA}	{NA}	{NA}	{NA}
X39GM004015	{kvd:KR75_11830; }	{NA}	{NA}	{NA}	{NA}
X39GM004044	{NA}	{NA}	{NA}	{NA}	{NA}
X39GM004050	{kva:Kvar_4424; }	{NA}	{NA}	{NA}	{NA}
X39GM004053	{kpe:KPK_4794; K02761 PTS-Cel-EIIC, celB, chbC PTS system, cellobiose-specific IIC component -- Metabolism; Carbohydrate metabolism; Starch and sucrose metabolism [PATH:ko00500] Environmental Information Processing; Membrane transport; Phosphotransferase system (PTS) [PATH:ko02060] }	{YP_002240582; COG1455 Phosphotransferase system cellobiose-specific component IIC G Carbohydrate transport and metabolism ;}	{GO:0005351; sugar:hydrogen symporter activity; molecular_function GO:0016020; membrane; cellular_component GO:0008982; protein-N(PI)-phosphohistidine-sugar phosphotransferase activity; molecular_function GO:0009401; phosphoenolpyruvate-dependent sugar phosphotransferase system; biological_process}	{NA}	{NA}
X39GM004054	{NA}	{NA}	{GO:0009401; phosphoenolpyruvate-dependent sugar phosphotransferase system; biological_process GO:0016020; membrane; cellular_component GO:0005351; sugar:hydrogen symporter activity; molecular_function GO:0008982; protein-N(PI)-phosphohistidine-sugar phosphotransferase activity; molecular_function}	{NA}	{NA}
X39GM004121	{NA}	{NA}	{NA}	{NA}	{NA}
X39GM004126	{NA}	{NA}	{NA}	{NA}	{NA}
X39GM004130	{ecla:ECNIH3_13375; }	{NA}	{NA}	{NA}	{NA}
X39GM004140	{NA}	{NA}	{NA}	{NA}	{NA}
X39GM004169	{kvq:SP68_17610; }	{NA}	{NA}	{NA}	{NA}
X39GM004170	{kpk:A593_13580; }	{NA}	{NA}	{NA}	{NA}
X39GM004171	{kvq:SP68_17595; }	{NA}	{NA}	{NA}	{NA}
X39GM004172	{kpa:KPNJ1_04903; }	{NA}	{NA}	{NA}	{NA}
X39GM004174	{NA}	{YP_434382; COG2801 Transposase InsO and inactivated derivatives X Mobilome: prophages, transposons;}	{NA}	{NA}	{NA}
X39GM004175	{kpn:KPN_04716; }	{YP_008832546; COG2801 Transposase InsO and inactivated derivatives X Mobilome: prophages, transposons;}	{NA}	{NA}	{NA}
X39GM004176	{kpn:KPN_04715; }	{NA}	{GO:0006810; transport; biological_process GO:0016020; membrane; cellular_component}	{NA}	{NA}
X39GM004177	{koe:A225_NDM1p0150; K07481 K07481 transposase, IS5 family -- }	{NP_414793; COG3039 Transposase and inactivated derivatives, IS5 family X Mobilome: prophages, transposons;}	{GO:0003677; DNA binding; molecular_function GO:0004803; transposase activity; molecular_function GO:0006313; transposition, DNA-mediated; biological_process}	{NA}	{NA}
X39GM004178	{NA}	{NA}	{NA}	{NA}	{NA}
X39GM004179	{NA}	{NA}	{NA}	{NA}	{NA}
X39GM004180	{kpn:KPN_04714; }	{NP_417899; COG3157 Type VI protein secretion system component Hcp (secreted cytotoxin) U Intracellular trafficking, secretion, and vesicular transport ;}	{GO:0003676; nucleic acid binding; molecular_function GO:0004519; endonuclease activity; molecular_function}	{NA}	{NA}
X39GM004182	{koc:AB185_33070; }	{NA}	{GO:0003677; DNA binding; molecular_function GO:0006352; transcription initiation, DNA-dependent; biological_process}	{NA}	{NA}
X39GM004183	{cdm:AFK67_02785; }	{NA}	{NA}	{NA}	{NA}
X39GM004184	{cama:F384_16675; }	{NP_463355; COG0497 DNA repair ATPase RecN L Replication, recombination and repair ;}	{GO:0004197; cysteine-type endopeptidase activity; molecular_function GO:0003779; actin binding; molecular_function GO:0008242; omega peptidase activity; molecular_function}	{NA}	{NA}
X39GM004185	{seen:SE451236_05495; }	{NP_463354; COG1002 Type II restriction/modification system, DNA methylase subunit YeeA V Defense mechanisms ;}	{GO:0006304; DNA modification; biological_process GO:0008170; N-methyltransferase activity; molecular_function GO:0003677; DNA binding; molecular_function GO:0006306; DNA methylation; biological_process GO:0003824; NA}	{NA}	{NA}
X39GM004186	{cama:F384_16685; }	{NA}	{GO:0003824; NA GO:0046872; metal ion binding; molecular_function}	{NA}	{NA}
X39GM004187	{koe:A225_0574; K01338 lon ATP-dependent Lon protease 3.4.21.53 Cellular Processes; Cell growth and death; Cell cycle - Caulobacter [PATH:ko04112] }	{NP_463350; COG4930 Predicted ATP-dependent Lon-type protease O Posttranslational modification, protein turnover, chaperones ;}	{GO:0005524; ATP binding; molecular_function GO:0004176; ATP-dependent peptidase activity; molecular_function GO:0004252; serine-type endopeptidase activity; molecular_function GO:0006508; proteolysis; biological_process}	{NA}	{NA}
X39GM004188	{kpt:VK055_2742; }	{YP_003525046; COG1502 Phosphatidylserine/phosphatidylglycerophosphate/cardiolipin synthase or related enzyme I Lipid transport and metabolism ;}	{GO:0003824; NA GO:0008152; NA}	{NA}	{NA}
X39GM004189	{kpt:VK055_2743; K07448 mrr restriction system protein -- }	{NP_463349; COG4127 Predicted restriction endonuclease, Mrr-cat superfamily R General function prediction only ;}	{GO:0004519; endonuclease activity; molecular_function GO:0003677; DNA binding; molecular_function GO:0009307; DNA restriction-modification system; biological_process}	{NA}	{NA}
X39GM004190	{sbg:SBG_3912; }	{YP_001454988; COG1502 Phosphatidylserine/phosphatidylglycerophosphate/cardiolipin synthase or related enzyme I Lipid transport and metabolism ;}	{GO:0008152; NA GO:0098519; NA GO:0005524; ATP binding; molecular_function GO:0003677; DNA binding; molecular_function GO:0006810; transport; biological_process GO:0003824; NA GO:0016887; ATPase activity; molecular_function GO:0016787; hydrolase activity; molecular_function}	{NA}	{NA}
X39GM004191	{cko:CKO_03473; }	{YP_001454989; COG3440 Predicted restriction endonuclease V Defense mechanisms ;}	{NA}	{NA}	{NA}
X39GM004220	{NA}	{NA}	{NA}	{NA}	{NA}
X39GM004223	{NA}	{NA}	{NA}	{NA}	{NA}
X39GM004229	{NA}	{NA}	{NA}	{NA}	{NA}
X39GM004300	{koc:AB185_33695; K13771 nsrR Rrf2 family transcriptional regulator, nitric oxide-sensitive transcriptional repressor -- Human Diseases; Infectious diseases; Salmonella infection [PATH:ko05132] }	{YP_002240865; COG1959 DNA-binding transcriptional regulator, IscR family K Transcription ;}	{NA}	{NA}	{NA}
X39GM004332	{kvq:SP68_16820; K07345 fimA major type 1 subunit fimbrin (pilin) -- Human Diseases; Infectious diseases; Pertussis [PATH:ko05133] }	{YP_003209766; COG3539 Pilin (type 1 fimbria component protein) N Cell motility ;}	{NA}	{NA}	{NA}
X39GM004333	{kvq:SP68_16815; }	{YP_003613416; COG3121 P pilus assembly protein, chaperone PapD W Extracellular structures ;}	{GO:0030288; outer membrane-bounded periplasmic space; cellular_component GO:0071555; cell wall organization; biological_process}	{VFG021666; CVF027 Sti stiB chaperone protein FimC - - - -}	{NA}
X39GM004334	{NA}	{NA}	{NA}	{NA}	{NA}
X39GM004335	{NA}	{NA}	{GO:0009289; pilus; cellular_component GO:0007155; cell adhesion; biological_process}	{NA}	{NA}
X39GM004336	{kvq:SP68_16805; }	{NA}	{NA}	{NA}	{NA}
X39GM004339	{kvq:SP68_16780; }	{NA}	{NA}	{NA}	{NA}
X39GM004343	{kpe:KPK_5139; }	{NA}	{NA}	{NA}	{NA}
X39GM004390	{kpb:FH42_18750; K22015 fdhF formate dehydrogenase (acceptor) 1.17.99.7 }	{YP_007875650; COG3383 Predicted molibdopterin-dependent oxidoreductase YjgC R General function prediction only ;}	{GO:0016491; oxidoreductase activity; molecular_function GO:0055114; oxidation-reduction process; biological_process}	{NA}	{NA}
X39GM004396	{kpb:FH42_18720; }	{YP_002240963; COG3162 Uncharacterized membrane protein, DUF485 family S Function unknown ;}	{NA}	{NA}	{NA}
X39GM004398	{NA}	{NA}	{NA}	{NA}	{NA}
X39GM004473	{NA}	{NA}	{NA}	{NA}	{NA}
X39GM004474	{kpk:A593_12090; K03324 yjbB phosphate:Na+ symporter -- }	{YP_002241045; COG1283 Na+/phosphate symporter P Inorganic ion transport and metabolism ;}	{GO:0015321; sodium-dependent phosphate transmembrane transporter activity; molecular_function GO:0016020; membrane; cellular_component GO:0044341; sodium-dependent phosphate transport; biological_process}	{NA}	{NA}
X39GM004486	{NA}	{NA}	{NA}	{NA}	{NA}
X39GM004501	{kqu:AVR78_05710; }	{NA}	{NA}	{NA}	{NA}
X39GM004506	{NA}	{NA}	{NA}	{NA}	{NA}
X39GM004519	{ses:SARI_03528; }	{NA}	{NA}	{NA}	{NA}
X39GM004540	{lef:LJPFL01_4085; }	{NA}	{NA}	{NA}	{NA}
X39GM004541	{NA}	{NA}	{NA}	{NA}	{NA}
X39GM004565	{kpe:KPK_5378; }	{NA}	{NA}	{NA}	{NA}
X39GM004589	{NA}	{NA}	{NA}	{NA}	{NA}
X39GM004600	{ses:SARI_03528; }	{NA}	{NA}	{NA}	{NA}
X39GM004618	{NA}	{NA}	{NA}	{NA}	{NA}
X39GM004619	{eclg:EC036_10800; K20117 PTS-Glc1-EIIB, ptsG, glcA, glcB PTS system, glucose-specific IIB component 2.7.1.199 Metabolism; Carbohydrate metabolism; Glycolysis / Gluconeogenesis [PATH:ko00010] Metabolism; Carbohydrate metabolism; Amino sugar and nucleotide sugar metabolism [PATH:ko00520] Environmental Information Processing; Membrane transport; Phosphotransferase system (PTS) [PATH:ko02060] }	{YP_003611785; COG1264 Phosphotransferase system IIB components G Carbohydrate transport and metabolism ;}	{GO:0008982; protein-N(PI)-phosphohistidine-sugar phosphotransferase activity; molecular_function GO:0016020; membrane; cellular_component GO:0005351; sugar:hydrogen symporter activity; molecular_function GO:0009401; phosphoenolpyruvate-dependent sugar phosphotransferase system; biological_process}	{NA}	{NA}
X39GM004620	{kle:AO703_05565; K16136 malI LacI family transcriptional regulator, maltose regulon regulatory protein -- }	{YP_003611784; COG1609 DNA-binding transcriptional regulator, LacI/PurR family K Transcription ;}	{GO:0043565; sequence-specific DNA binding; molecular_function GO:0006355; regulation of transcription, DNA-dependent; biological_process GO:0003700; sequence-specific DNA binding transcription factor activity; molecular_function}	{NA}	{NA}
X39GM004692	{koe:A225_5847; }	{NA}	{NA}	{NA}	{NA}
X39GM004715	{kpe:KPK_5537; K02116 atpI ATP synthase protein I -- }	{YP_002241280; COG3312 FoF1-type ATP synthase assembly protein I C Energy production and conversion ;}	{NA}	{NA}	{NA}
X39GM004743	{kpb:FH42_16925; }	{NA}	{NA}	{NA}	{NA}
X39GM004778	{NA}	{NA}	{NA}	{NA}	{NA}
X39GM004785	{kpe:KPK_0041; }	{YP_002235926; COG2814 Predicted arabinose efflux permease, MFS family G Carbohydrate transport and metabolism ;}	{GO:0022857; transmembrane transporter activity; molecular_function GO:0016021; integral to membrane; cellular_component GO:0008198; ferrous iron binding; molecular_function GO:0055085; transmembrane transport; biological_process GO:0006725; cellular aromatic compound metabolic process; biological_process GO:0016491; oxidoreductase activity; molecular_function}	{NA}	{NA}
X39GM004793	{kpa:KPNJ1_00067; }	{NA}	{NA}	{NA}	{NA}
X39GM004818	{kpo:KPN2242_23170; }	{NA}	{NA}	{NA}	{NA}
X39GM004906	{kpe:KPK_0171; K03796 bax Bax protein -- }	{YP_002236055; COG2992 Uncharacterized FlgJ-related protein R General function prediction only ;}	{GO:0004040; amidase activity; molecular_function GO:0009253; peptidoglycan catabolic process; biological_process}	{NA}	{NA}
X39GM004955	{kpr:KPR_5028; K00694 bcsA cellulose synthase (UDP-forming) 2.4.1.12 Metabolism; Carbohydrate metabolism; Starch and sucrose metabolism [PATH:ko00500] Cellular Processes; Cellular community - prokaryotes; Biofilm formation - Escherichia coli [PATH:ko02026] }	{NA}	{GO:0007219; Notch signaling pathway; biological_process GO:0045944; positive regulation of transcription from RNA polymerase II promoter; biological_process GO:0003713; transcription coactivator activity; molecular_function GO:0016607; nuclear speck; cellular_component}	{NA}	{NA}
X39GM004976	{NA}	{NA}	{NA}	{NA}	{NA}
X39GM004982	{kpa:KPNJ1_00267; K06144 uspB universal stress protein B -- }	{NA}	{NA}	{NA}	{NA}
X39GM005019	{NA}	{NA}	{NA}	{NA}	{NA}
X39GM005021	{kpk:A593_09310; }	{NA}	{NA}	{NA}	{NA}
X39GM005065	{kpb:FH42_15220; K04758 feoA ferrous iron transport protein A -- }	{YP_002236219; COG1918 Fe2+ transport system protein FeoA P Inorganic ion transport and metabolism ;}	{GO:0046914; transition metal ion binding; molecular_function}	{NA}	{NA}
X39GM005066	{kpe:KPK_0338; }	{NA}	{NA}	{NA}	{NA}
X39GM005121	{NA}	{NA}	{NA}	{NA}	{NA}
X39GM005124	{kpe:KPK_0397; }	{NA}	{NA}	{NA}	{NA}
X39GM005256	{kpe:KPK_0538; }	{NA}	{NA}	{NA}	{NA}
X39GM005293	{NA}	{NA}	{NA}	{NA}	{NA}
X39GM005305	{kpe:KPK_0577; }	{NA}	{NA}	{NA}	{NA}
X39GM005319	{kva:Kvar_0578; }	{NA}	{NA}	{NA}	{NA}
X39GM005329	{NA}	{NA}	{NA}	{NA}	{NA}
X39GM005365	{NA}	{NA}	{NA}	{NA}	{NA}
X39GM005367	{kpe:KPK_0640; }	{NA}	{NA}	{NA}	{NA}
X39GM005369	{kpx:PMK1_00995; }	{NA}	{NA}	{NA}	{NA}
X39GM005370	{kpx:PMK1_00994; }	{NA}	{GO:0006355; regulation of transcription, DNA-dependent; biological_process GO:0003677; DNA binding; molecular_function GO:0000156; two-component response regulator activity; molecular_function GO:0000160; two-component signal transduction system (phosphorelay); biological_process}	{NA}	{NA}
X39GM005371	{kpx:PMK1_00993; }	{NA}	{GO:0003899; DNA-directed RNA polymerase activity; molecular_function GO:0006351; transcription, DNA-dependent; biological_process GO:0003700; sequence-specific DNA binding transcription factor activity; molecular_function GO:0003677; DNA binding; molecular_function GO:0006355; regulation of transcription, DNA-dependent; biological_process}	{NA}	{NA}
X39GM005378	{kpx:PMK1_00983; }	{YP_001455227; COG2200 EAL domain, c-di-GMP-specific phosphodiesterase class I (or its enzymatically inactive variant) T Signal transduction mechanisms ;}	{NA}	{VFG043612; AI075 type 1 fimbriae fimK putative cyclic diguanylate phosphodiesterase - - - -}	{NA}
X39GM005394	{NA}	{NA}	{NA}	{NA}	{NA}
X39GM005398	{kpe:KPK_0662; }	{NA}	{NA}	{NA}	{NA}
X39GM005439	{kpi:D364_17585; }	{NA}	{NA}	{NA}	{NA}
X39GM005446	{kpa:KPNJ1_00761; }	{YP_003614787; COG4453 Uncharacterized conserved protein, DUF1778 family S Function unknown ;}	{GO:0006355; regulation of transcription, DNA-dependent; biological_process}	{NA}	{NA}
X39GM005448	{NA}	{NA}	{NA}	{NA}	{NA}
X39GM005449	{kpa:KPNJ1_00764; K07497 K07497 putative transposase -- }	{YP_003881458; COG2963 Transposase and inactivated derivatives X Mobilome: prophages, transposons;}	{GO:0003677; DNA binding; molecular_function GO:0004803; transposase activity; molecular_function GO:0006313; transposition, DNA-mediated; biological_process}	{NA}	{NA}
X39GM005461	{NA}	{NA}	{NA}	{NA}	{NA}
X39GM005478	{kpe:KPK_0735; }	{NA}	{NA}	{NA}	{NA}
X39GM005492	{enr:H650_10885; }	{NA}	{NA}	{NA}	{NA}
X39GM005559	{NA}	{NA}	{NA}	{NA}	{NA}
X39GM005576	{kpk:A593_06485; }	{YP_002236715; COG0583 DNA-binding transcriptional regulator, LysR family K Transcription ;}	{GO:0003700; sequence-specific DNA binding transcription factor activity; molecular_function GO:0006355; regulation of transcription, DNA-dependent; biological_process}	{NA}	{NA}
X39GM005590	{kpe:KPK_0858; }	{NA}	{NA}	{NA}	{NA}
X39GM005627	{kpr:KPR_1814; K04031 eutS ethanolamine utilization protein EutS -- }	{YP_007273014; COG4810 Ethanolamine utilization protein EutS, ethanolamine utilization microcompartment shell protein E Amino acid transport and metabolism ;}	{NA}	{NA}	{NA}
X39GM005697	{kpa:KPNJ1_01102; }	{NA}	{NA}	{NA}	{NA}
X39GM005705	{kpe:KPK_0994; K07678 barA, gacS, varS two-component system, NarL family, sensor histidine kinase BarA 2.7.13.3 Environmental Information Processing; Signal transduction; Two-component system [PATH:ko02020] Cellular Processes; Cellular community - prokaryotes; Biofilm formation - Pseudomonas aeruginosa [PATH:ko02025] Cellular Processes; Cellular community - prokaryotes; Biofilm formation - Escher…	{YP_002236863; COG4999 Uncharacterized domain of BarA-like signal transduction histidine kinase T Signal transduction mechanisms ;}	{GO:0005524; ATP binding; molecular_function GO:0006355; regulation of transcription, DNA-dependent; biological_process GO:0005096; GTPase activator activity; molecular_function GO:0004871; signal transducer activity; molecular_function GO:0000160; two-component signal transduction system (phosphorelay); biological_process GO:0043547; positive regulation of GTPase activity; biological_process GO:…	{NA}	{NA}
X39GM005706	{kpe:KPK_0994; K07678 barA, gacS, varS two-component system, NarL family, sensor histidine kinase BarA 2.7.13.3 Environmental Information Processing; Signal transduction; Two-component system [PATH:ko02020] Cellular Processes; Cellular community - prokaryotes; Biofilm formation - Pseudomonas aeruginosa [PATH:ko02025] Cellular Processes; Cellular community - prokaryotes; Biofilm formation - Escher…	{YP_002236863; COG4999 Uncharacterized domain of BarA-like signal transduction histidine kinase T Signal transduction mechanisms ;}	{GO:0005524; ATP binding; molecular_function GO:0016020; membrane; cellular_component GO:0016021; integral to membrane; cellular_component GO:0007165; signal transduction; biological_process GO:0004871; signal transducer activity; molecular_function GO:0000155; two-component sensor activity; molecular_function}	{VFG015067; CVF529 GacS/GacA two-component system gacS sensor/response regulator hybrid - - - -}	{NA}
X39GM005735	{kpe:KPK_1023; }	{YP_002236892; COG0583 DNA-binding transcriptional regulator, LysR family K Transcription ;}	{GO:0003700; sequence-specific DNA binding transcription factor activity; molecular_function GO:0006355; regulation of transcription, DNA-dependent; biological_process}	{NA}	{NA}
X39GM005813	{NA}	{NA}	{NA}	{NA}	{NA}
X39GM005816	{kpe:KPK_1107; }	{YP_002236971; COG1238 Uncharacterized membrane protein YqaA, SNARE-associated domain S Function unknown ;}	{NA}	{NA}	{NA}
X39GM005891	{kpi:D364_15115; }	{NA}	{NA}	{NA}	{NA}
X39GM005894	{NA}	{NA}	{NA}	{NA}	{NA}
X39GM005895	{NA}	{NA}	{NA}	{NA}	{NA}
X39GM005896	{kom:HR38_26220; }	{NA}	{NA}	{NA}	{NA}
X39GM005897	{kom:HR38_26215; }	{NA}	{NA}	{NA}	{NA}
X39GM005898	{kpr:KPR_1328; K14059 int integrase -- }	{YP_003881567; COG0582 Integrase LX Replication, recombination and repair ; Mobilome: prophages, transposons;}	{GO:0015074; DNA integration; biological_process GO:0003677; DNA binding; molecular_function GO:0006310; DNA recombination; biological_process}	{NA}	{NA}
X39GM005899	{kom:HR38_26205; }	{NA}	{NA}	{NA}	{NA}
X39GM005900	{kpa:KPNJ1_03165; }	{NA}	{NA}	{NA}	{NA}
X39GM005901	{kpr:KPR_4243; }	{NA}	{NA}	{NA}	{NA}
X39GM005902	{kpa:KPNJ1_03160; }	{NA}	{NA}	{NA}	{NA}
X39GM005903	{kpz:KPNIH27_10880; }	{NA}	{NA}	{NA}	{NA}
X39GM005904	{kpz:KPNIH27_10885; }	{NA}	{NA}	{NA}	{NA}
X39GM005905	{kpz:KPNIH27_10890; }	{NA}	{NA}	{NA}	{NA}
X39GM005906	{kpz:KPNIH27_10895; }	{NA}	{NA}	{NA}	{NA}
X39GM005907	{kpz:KPNIH27_10900; }	{YP_006218235; COG2932 Phage repressor protein C, contains Cro/C1-type HTH and peptisase s24 domains X Mobilome: prophages, transposons;}	{GO:0005524; ATP binding; molecular_function GO:0016987; sigma factor activity; molecular_function GO:0006352; transcription initiation, DNA-dependent; biological_process GO:0003677; DNA binding; molecular_function GO:0006355; regulation of transcription, DNA-dependent; biological_process GO:0043565; sequence-specific DNA binding; molecular_function GO:0019069; viral capsid assembly; biological_p…	{NA}	{NA}
X39GM005908	{yel:LC20_03921; }	{NA}	{NA}	{NA}	{NA}
X39GM005909	{csk:ES15_1253; }	{NA}	{NA}	{NA}	{NA}
X39GM005910	{enx:NI40_008660; }	{NA}	{NA}	{NA}	{NA}
X39GM005911	{NA}	{NA}	{NA}	{NA}	{NA}
X39GM005912	{kpz:KPNIH27_15805; K02315 dnaC DNA replication protein DnaC -- }	{NP_930689; COG1484 DNA replication protein DnaC L Replication, recombination and repair ;}	{GO:0051085; chaperone mediated protein folding requiring cofactor; biological_process GO:0003723; RNA binding; molecular_function GO:0003678; DNA helicase activity; molecular_function GO:0016887; ATPase activity; molecular_function GO:0003724; RNA helicase activity; molecular_function GO:0005524; ATP binding; molecular_function}	{NA}	{NA}
X39GM005913	{kpz:KPNIH27_15800; K02314 dnaB replicative DNA helicase 3.6.4.12 Genetic Information Processing; Replication and repair; DNA replication [PATH:ko03030] Cellular Processes; Cell growth and death; Cell cycle - Caulobacter [PATH:ko04112] }	{YP_004116011; COG0305 Replicative DNA helicase L Replication, recombination and repair ;}	{GO:0006260; DNA replication; biological_process GO:0003678; DNA helicase activity; molecular_function GO:0005524; ATP binding; molecular_function}	{NA}	{NA}
X39GM005914	{koc:AB185_23435; }	{YP_001453446; COG4570 Holliday junction resolvase RusA (prophage-encoded endonuclease) L Replication, recombination and repair ;}	{GO:0000287; magnesium ion binding; molecular_function GO:0006281; DNA repair; biological_process GO:0006310; DNA recombination; biological_process}	{NA}	{NA}
X39GM005915	{NA}	{NA}	{NA}	{NA}	{NA}
X39GM005916	{kpa:KPNJ1_03150; }	{NA}	{NA}	{NA}	{NA}
X39GM005918	{NA}	{NA}	{NA}	{NA}	{NA}
X39GM005919	{kpa:KPNJ1_04172; }	{NA}	{NA}	{NA}	{NA}
X39GM005922	{kvq:SP68_25605; }	{NA}	{GO:0006511; ubiquitin-dependent protein catabolic process; biological_process}	{NA}	{NA}
X39GM005925	{NA}	{NA}	{NA}	{NA}	{NA}
X39GM005929	{kom:HR38_26060; }	{YP_002150681; COG4626 Phage terminase-like protein, large subunit, contains N-terminal HTH domain X Mobilome: prophages, transposons;}	{NA}	{NA}	{NA}
X39GM005930	{kom:HR38_26055; }	{YP_003210108; COG4695 Phage portal protein BeeE X Mobilome: prophages, transposons;}	{NA}	{NA}	{NA}
X39GM005931	{kpz:KPNIH27_19055; }	{YP_004212553; COG0740 ATP-dependent protease ClpP, protease subunit O Posttranslational modification, protein turnover, chaperones ;}	{GO:0016021; integral to membrane; cellular_component}	{NA}	{NA}
X39GM005932	{seec:CFSAN002050_16095; }	{YP_454402; COG4653 Predicted phage phi-C31 gp36 major capsid-like protein X Mobilome: prophages, transposons;}	{GO:0005524; ATP binding; molecular_function GO:0004828; serine-tRNA ligase activity; molecular_function GO:0005737; cytoplasm; cellular_component GO:0006434; seryl-tRNA aminoacylation; biological_process GO:0003677; DNA binding; molecular_function GO:0000166; nucleotide binding; molecular_function GO:0003824; NA GO:0007165; signal transduction; biological_process GO:0016301; kinase activity; mol…	{NA}	{NA}
X39GM005933	{kqu:AVR78_23055; }	{NA}	{GO:0016020; membrane; cellular_component}	{NA}	{NA}
X39GM005934	{kpz:KPNIH27_19040; }	{NA}	{NA}	{NA}	{NA}
X39GM005935	{kpz:KPNIH27_19035; }	{YP_004118108; COG5614 Bacteriophage head-tail adaptor X Mobilome: prophages, transposons;}	{NA}	{NA}	{NA}
X39GM005936	{kpz:KPNIH27_09825; }	{NA}	{NA}	{NA}	{NA}
X39GM005937	{kpv:KPNIH29_10330; }	{NA}	{NA}	{NA}	{NA}
X39GM005938	{kpz:KPNIH27_11020; }	{NA}	{NA}	{NA}	{NA}
X39GM005939	{kpz:KPNIH27_11025; }	{NA}	{NA}	{NA}	{NA}
X39GM005940	{kpz:KPNIH27_19010; }	{NA}	{NA}	{NA}	{NA}
X39GM005941	{kpv:KPNIH29_10350; }	{NA}	{GO:0046873; metal ion transmembrane transporter activity; molecular_function GO:0055085; transmembrane transport; biological_process GO:0030001; metal ion transport; biological_process GO:0016020; membrane; cellular_component}	{NA}	{NA}
X39GM005942	{kpv:KPNIH29_10360; }	{NP_310010; COG5281 Phage-related minor tail protein X Mobilome: prophages, transposons;}	{NA}	{NA}	{NA}
X39GM005946	{kpt:VK055_5184; }	{NA}	{NA}	{NA}	{NA}
X39GM005947	{kpi:D364_07740; }	{NA}	{NA}	{NA}	{NA}
X39GM005948	{NA}	{NA}	{GO:0006629; lipid metabolic process; biological_process GO:0016788; hydrolase activity, acting on ester bonds; molecular_function}	{NA}	{NA}
X39GM005949	{NA}	{NA}	{NA}	{NA}	{NA}
X39GM005950	{NA}	{NA}	{NA}	{NA}	{NA}
X39GM005952	{koc:AB185_23245; }	{NA}	{NA}	{NA}	{NA}
X39GM005966	{NA}	{NA}	{NA}	{NA}	{NA}
X39GM005967	{kvq:SP68_08710; }	{YP_003211555; COG3667 Uncharacterized protein involved in copper resistance P Inorganic ion transport and metabolism ;}	{NA}	{NA}	{NA}
X39GM005997	{kpr:KPR_3607; }	{NP_461571; COG0582 Integrase LX Replication, recombination and repair ; Mobilome: prophages, transposons;}	{GO:0006310; DNA recombination; biological_process GO:0003677; DNA binding; molecular_function GO:0015074; DNA integration; biological_process}	{NA}	{NA}
X39GM005998	{kpr:KPR_3605; }	{NA}	{NA}	{NA}	{NA}
X39GM006004	{NA}	{NA}	{NA}	{NA}	{NA}
X39GM006005	{seb:STM474_1000; }	{NA}	{GO:0043565; sequence-specific DNA binding; molecular_function}	{NA}	{NA}
X39GM006006	{kgo:CEW81_05855; }	{NP_309097; COG4197 DNA-binding transcriptional regulator YdaS, prophage-encoded, Cro superfamily K Transcription ;}	{NA}	{NA}	{NA}
X39GM006008	{NA}	{NA}	{NA}	{NA}	{NA}
X39GM006009	{ron:TE10_16540; }	{NA}	{GO:0006355; regulation of transcription, DNA-dependent; biological_process GO:0006260; DNA replication; biological_process GO:0005622; intracellular; cellular_component GO:0003700; sequence-specific DNA binding transcription factor activity; molecular_function}	{NA}	{NA}
X39GM006010	{ron:TE10_16535; }	{NA}	{GO:0006270; DNA-dependent DNA replication initiation; biological_process}	{NA}	{NA}
X39GM006014	{kgo:CEW81_05955; }	{NA}	{NA}	{NA}	{NA}
X39GM006015	{kox:KOX_15425; }	{YP_008849334; COG0484 DnaJ-class molecular chaperone with C-terminal Zn finger domain O Posttranslational modification, protein turnover, chaperones ;}	{GO:0051082; unfolded protein binding; molecular_function GO:0006355; regulation of transcription, DNA-dependent; biological_process GO:0006464; protein modification process; biological_process GO:0003677; DNA binding; molecular_function GO:0016151; nickel ion binding; molecular_function GO:0031072; heat shock protein binding; molecular_function}	{NA}	{NA}
X39GM006019	{eae:EAE_21115; }	{NA}	{NA}	{NA}	{NA}
X39GM006022	{kpv:KPNIH29_10270; }	{NA}	{NA}	{NA}	{NA}
X39GM006034	{kva:Kvar_2112; }	{YP_001453419; COG5492 Uncharacterized conserved protein YjdB, contains Ig-like domain R General function prediction only ;}	{NA}	{NA}	{NA}
X39GM006037	{kph:KPNIH24_17405; }	{NA}	{NA}	{NA}	{NA}
X39GM006038	{NA}	{NA}	{NA}	{NA}	{NA}

## Sheet: 342.unique genes
Gene_id	{KEGG}	{COG}	{GO}	{VFDB}	{ARDB}
Annotation_num	440	210	207	6	0
WP_000101767.1	{kpe:KPK_1292; }	{NA}	{GO:0000746; conjugation; biological_process}	{NA}	{NA}
WP_000301240.1	{kpe:KPK_A0197; K05795 terD tellurium resistance protein TerD -- }	{YP_002235837; COG2310 Stress response protein SCP2 T Signal transduction mechanisms ;}	{GO:0006950; response to stress; biological_process}	{NA}	{NA}
WP_000410046.1	{bcar:DK60_2089; K07733 alpA prophage regulatory protein -- }	{YP_002237146; COG3311 Predicted DNA-binding transcriptional regulator AlpA KX Transcription ; Mobilome: prophages, transposons;}	{NA}	{NA}	{NA}
WP_000854792.1	{kqv:B8P98_04260; }	{NA}	{NA}	{NA}	{NA}
WP_001100942.1	{kpz:KPNIH27_28085; }	{YP_002235834; COG0560 Phosphoserine phosphatase E Amino acid transport and metabolism ;}	{GO:0005975; carbohydrate metabolic process; biological_process GO:0000775; chromosome, centromeric region; cellular_component GO:0016020; membrane; cellular_component GO:0045132; meiotic chromosome segregation; biological_process GO:0016758; transferase activity, transferring hexosyl groups; molecular_function GO:0005634; nucleus; cellular_component}	{NA}	{NA}
WP_001333465.1	{kpe:KPK_3128; }	{YP_002238954; COG0582 Integrase LX Replication, recombination and repair ; Mobilome: prophages, transposons;}	{GO:0003677; DNA binding; molecular_function GO:0006310; DNA recombination; biological_process GO:0015074; DNA integration; biological_process}	{NA}	{NA}
WP_001410814.1	{psg:G655_05895; }	{NA}	{NA}	{NA}	{NA}
WP_001518114.1	{koc:AB185_26025; }	{NA}	{NA}	{NA}	{NA}
WP_001610847.1	{kpe:KPK_4438; }	{NA}	{NA}	{NA}	{NA}
WP_002889868.1	{kpa:KPNJ1_04454; }	{YP_002240264; COG1830 Fructose-bisphosphate aldolase class Ia, DhnA family G Carbohydrate transport and metabolism ;}	{GO:0016829; lyase activity; molecular_function}	{NA}	{NA}
WP_002889874.1	{kpa:KPNJ1_04453; }	{NA}	{NA}	{NA}	{NA}
WP_004026585.1	{kpe:KPK_A0213; }	{YP_002235853; COG4245 Uncharacterized conserved protein YegL, contains vWA domain of TerY type S Function unknown ;}	{GO:0006886; intracellular protein transport; biological_process GO:0030127; COPII vesicle coat; cellular_component GO:0006888; ER to Golgi vesicle-mediated transport; biological_process}	{NA}	{NA}
WP_004026604.1	{kpe:KPK_A0200; K05793 terB tellurite resistance protein TerB -- }	{YP_002235840; COG3793 Tellurite resistance protein P Inorganic ion transport and metabolism ;}	{NA}	{NA}	{NA}
WP_004026609.1	{kpe:KPK_A0198; K05795 terD tellurium resistance protein TerD -- }	{YP_002235838; COG2310 Stress response protein SCP2 T Signal transduction mechanisms ;}	{GO:0006950; response to stress; biological_process}	{NA}	{NA}
WP_004117854.1	{kpe:KPK_A0002; }	{NA}	{GO:0004748; ribonucleoside-diphosphate reductase activity; molecular_function GO:0005524; ATP binding; molecular_function GO:0055114; oxidation-reduction process; biological_process GO:0006260; DNA replication; biological_process}	{NA}	{NA}
WP_004118067.1	{kpu:KP1_p229; }	{NA}	{NA}	{NA}	{NA}
WP_004135670.1	{kpk:A593_03840; }	{NA}	{NA}	{NA}	{NA}
WP_004136823.1	{kpe:KPK_B0004; }	{YP_002235546; COG0300 Short-chain dehydrogenase R General function prediction only ;}	{GO:0016491; oxidoreductase activity; molecular_function GO:0003824; NA GO:0050662; coenzyme binding; molecular_function GO:0009058; biosynthetic process; biological_process GO:0008152; NA GO:0045226; extracellular polysaccharide biosynthetic process; biological_process GO:0044237; cellular metabolic process; biological_process GO:0008831; dTDP-4-dehydrorhamnose reductase activity; molecular_func…	{NA}	{NA}
WP_004141720.1	{kpe:KPK_4174; }	{NA}	{GO:0003677; DNA binding; molecular_function GO:0006355; regulation of transcription, DNA-dependent; biological_process}	{NA}	{NA}
WP_004142899.1	{kpe:KPK_0948; }	{NA}	{NA}	{NA}	{NA}
WP_004181140.1	{kpe:KPK_0946; K11892 impK, ompA, vasF, dotU type VI secretion system protein ImpK -- Environmental Information Processing; Membrane transport; Bacterial secretion system [PATH:ko03070] }	{YP_002236818; COG3455 Type VI protein secretion system component VasF U Intracellular trafficking, secretion, and vesicular transport ;}	{GO:0003677; DNA binding; molecular_function}	{VFG035141; CVF734 SCI-I T6SS ECO103_3360 hypothetical protein - - - -}	{NA}
WP_004192273.1	{kpe:KPK_4936; }	{NA}	{NA}	{NA}	{NA}
WP_004898926.1	{koe:A225_3475; }	{YP_943896; COG3428 Uncharacterized membrane protein YdbT, contains bPH2 (bacterial pleckstrin homology) domain S Function unknown ;}	{NA}	{NA}	{NA}
WP_004899298.1	{kpe:KPK_B0021; }	{NA}	{GO:0050690; regulation of defense response to virus by virus; biological_process GO:0005537; mannose binding; molecular_function}	{NA}	{NA}
WP_008804509.1	{kpe:KPK_2230; K00059 fabG 3-oxoacyl-[acyl-carrier protein] reductase 1.1.1.100 }	{YP_002238066; COG1028 NAD(P)-dependent dehydrogenase, short-chain alcohol dehydrogenase family IQR Lipid transport and metabolism ; Secondary metabolites biosynthesis, transport and catabolism ; General function prediction only ;}	{GO:0008152; NA GO:0045226; extracellular polysaccharide biosynthetic process; biological_process GO:0050662; coenzyme binding; molecular_function GO:0016491; oxidoreductase activity; molecular_function GO:0003824; NA GO:0044237; cellular metabolic process; biological_process GO:0008831; dTDP-4-dehydrorhamnose reductase activity; molecular_function}	{NA}	{NA}
WP_008804510.1	{kpe:KPK_2231; }	{YP_002238067; COG0583 DNA-binding transcriptional regulator, LysR family K Transcription ;}	{GO:0006355; regulation of transcription, DNA-dependent; biological_process GO:0003700; sequence-specific DNA binding transcription factor activity; molecular_function GO:0043565; sequence-specific DNA binding; molecular_function}	{NA}	{NA}
WP_008804511.1	{kpe:KPK_2232; }	{YP_002238068; COG3038 Cytochrome b561 C Energy production and conversion ;}	{GO:0016021; integral to membrane; cellular_component GO:0009055; NA}	{NA}	{NA}
WP_008805284.1	{kpe:KPK_4466; K02443 glpP glycerol uptake operon antiterminator -- }	{YP_002240265; COG1954 Glycerol-3-phosphate responsive antiterminator (mRNA-binding) K Transcription ;}	{GO:0009607; response to biotic stimulus; biological_process GO:0006355; regulation of transcription, DNA-dependent; biological_process}	{NA}	{NA}
WP_008807506.1	{kpe:KPK_4751; }	{NA}	{GO:0019867; outer membrane; cellular_component}	{NA}	{NA}
WP_009308026.1	{kpe:KPK_4143; }	{YP_002239946; COG5410 Uncharacterized protein S Function unknown ;}	{NA}	{NA}	{NA}
WP_009308057.1	{kpe:KPK_4126; }	{NA}	{NA}	{NA}	{NA}
WP_009308058.1	{kpe:KPK_4125; }	{NA}	{NA}	{NA}	{NA}
WP_009309912.1	{kpe:KPK_A0150; K07052 K07052 uncharacterized protein -- }	{YP_002235796; COG1266 Membrane protease YdiL, CAAX protease family O Posttranslational modification, protein turnover, chaperones ;}	{GO:0016020; membrane; cellular_component}	{NA}	{NA}
WP_012539935.1	{kpe:KPK_B0028; }	{NA}	{NA}	{NA}	{NA}
WP_012539937.1	{kpe:KPK_B0080; }	{NA}	{NA}	{NA}	{NA}
WP_012539939.1	{kpe:KPK_B0103; }	{NA}	{GO:0005886; plasma membrane; cellular_component GO:0008324; cation transmembrane transporter activity; molecular_function GO:0006812; cation transport; biological_process GO:0006810; transport; biological_process}	{NA}	{NA}
WP_012539940.1	{kpe:KPK_B0017; }	{YP_002235559; COG0697 Permease of the drug/metabolite transporter (DMT) superfamily GER Carbohydrate transport and metabolism ; Amino acid transport and metabolism ; General function prediction only ;}	{GO:0015693; magnesium ion transport; biological_process GO:0015095; magnesium ion transmembrane transporter activity; molecular_function GO:0016020; membrane; cellular_component GO:0055085; transmembrane transport; biological_process GO:0004930; G-protein coupled receptor activity; molecular_function GO:0016021; integral to membrane; cellular_component GO:0007186; G-protein coupled receptor prot…	{NA}	{NA}
WP_012539945.1	{kpe:KPK_B0069; }	{YP_002235606; COG0667 Predicted oxidoreductase (related to aryl-alcohol dehydrogenase) R General function prediction only ;}	{NA}	{NA}	{NA}
WP_012539946.1	{kpe:KPK_B0102; }	{NA}	{NA}	{NA}	{NA}
WP_012539947.1	{kpe:KPK_B0030; }	{YP_002235570; COG1961 Site-specific DNA recombinase related to the DNA invertase Pin L Replication, recombination and repair ;}	{GO:0006352; transcription initiation, DNA-dependent; biological_process GO:0006310; DNA recombination; biological_process GO:0003677; DNA binding; molecular_function GO:0003700; sequence-specific DNA binding transcription factor activity; molecular_function GO:0006355; regulation of transcription, DNA-dependent; biological_process GO:0016987; sigma factor activity; molecular_function GO:0000150;…	{NA}	{NA}
WP_012539950.1	{kpe:KPK_B0048; }	{YP_002235588; COG2135 Putative SOS response-associated peptidase YedK O Posttranslational modification, protein turnover, chaperones ;}	{GO:0009976; tocopherol cyclase activity; molecular_function}	{NA}	{NA}
WP_012539959.1	{kpe:KPK_B0036; K02821 PTS-Ula-EIIA, ulaC, sgaA PTS system, ascorbate-specific IIA component 2.7.1.194 }	{YP_002235576; COG1762 Phosphotransferase system mannitol/fructose-specific IIA domain (Ntr-type) GT Carbohydrate transport and metabolism ; Signal transduction mechanisms ;}	{NA}	{NA}	{NA}
WP_012539960.1	{kpe:KPK_B0101; }	{NA}	{NA}	{NA}	{NA}
WP_012539961.1	{kpe:KPK_B0012; }	{YP_002235554; COG4977 Transcriptional regulator GlxA family, contains an amidase domain and an AraC-type DNA-binding HTH domain K Transcription ;}	{GO:0003700; sequence-specific DNA binding transcription factor activity; molecular_function GO:0006355; regulation of transcription, DNA-dependent; biological_process GO:0043565; sequence-specific DNA binding; molecular_function}	{NA}	{NA}
WP_012539966.1	{kpe:KPK_B0083; }	{NA}	{NA}	{NA}	{NA}
WP_012539969.1	{kpe:KPK_B0054; }	{YP_002235593; COG1670 Protein N-acetyltransferase, RimJ/RimL family JO Translation, ribosomal structure and biogenesis ; Posttranslational modification, protein turnover, chaperones ;}	{GO:0008080; N-acetyltransferase activity; molecular_function}	{NA}	{NA}
WP_012539970.1	{kpe:KPK_B0039; K02799 PTS-Mtl-EIIB, mtlA, cmtA PTS system, mannitol-specific IIB component 2.7.1.197 Metabolism; Carbohydrate metabolism; Fructose and mannose metabolism [PATH:ko00051] Environmental Information Processing; Membrane transport; Phosphotransferase system (PTS) [PATH:ko02060] }	{YP_002235579; COG2213 Phosphotransferase system, mannitol-specific IIBC component G Carbohydrate transport and metabolism ;}	{GO:0009401; phosphoenolpyruvate-dependent sugar phosphotransferase system; biological_process GO:0005351; sugar:hydrogen symporter activity; molecular_function GO:0016020; membrane; cellular_component GO:0008982; protein-N(PI)-phosphohistidine-sugar phosphotransferase activity; molecular_function}	{NA}	{NA}
WP_012539974.1	{kpe:KPK_B0016; }	{YP_002235558; COG1737 DNA-binding transcriptional regulator, MurR/RpiR family, contains HTH and SIS domains K Transcription ;}	{GO:0030246; carbohydrate binding; molecular_function GO:0003700; sequence-specific DNA binding transcription factor activity; molecular_function GO:0006355; regulation of transcription, DNA-dependent; biological_process GO:0005975; carbohydrate metabolic process; biological_process}	{NA}	{NA}
WP_012539975.1	{kpe:KPK_B0008; }	{YP_002235615; COG3547 Transposase X Mobilome: prophages, transposons;}	{GO:0006313; transposition, DNA-mediated; biological_process GO:0004803; transposase activity; molecular_function GO:0003677; DNA binding; molecular_function}	{NA}	{NA}
WP_012539976.1	{kpe:KPK_B0046; }	{YP_002235586; COG2320 GrpB domain, predicted nucleotidyltransferase, UPF0157 family R General function prediction only ;}	{NA}	{NA}	{NA}
WP_012539978.1	{kpe:KPK_B0088; K19163 ccdB toxin CcdB -- }	{NA}	{GO:0006276; plasmid maintenance; biological_process GO:0008657; DNA topoisomerase (ATP-hydrolyzing) inhibitor activity; molecular_function}	{NA}	{NA}
WP_012539979.1	{kpe:KPK_B0044; }	{NA}	{NA}	{NA}	{NA}
WP_012539980.1	{kpe:KPK_B0026; }	{YP_002235567; COG4221 NADP-dependent 3-hydroxy acid dehydrogenase YdfG C Energy production and conversion ;}	{GO:0008152; NA GO:0009396; folic acid-containing compound biosynthetic process; biological_process GO:0008270; zinc ion binding; molecular_function GO:0016491; oxidoreductase activity; molecular_function GO:0043115; precorrin-2 dehydrogenase activity; molecular_function GO:0019354; siroheme biosynthetic process; biological_process GO:0006779; porphyrin biosynthetic process; biological_process GO…	{NA}	{NA}
WP_012539985.1	{kpe:KPK_B0057; }	{YP_006817515; COG4737 Uncharacterized protein S Function unknown ;}	{NA}	{NA}	{NA}
WP_012539986.1	{kpe:KPK_B0087; K19164 ccdA antitoxin CcdA -- }	{YP_002235624; COG5302 Post-segregation antitoxin (ccd killing mechanism protein) encoded by the F plasmid X Mobilome: prophages, transposons;}	{NA}	{NA}	{NA}
WP_012539987.1	{kpe:KPK_B0067; }	{NA}	{NA}	{NA}	{NA}
WP_012539988.1	{kpe:KPK_B0099; K12060 traU conjugal transfer pilus assembly protein TraU -- }	{NA}	{NA}	{NA}	{NA}
WP_012539993.1	{kpe:KPK_B0009; K07124 K07124 uncharacterized protein -- }	{YP_002235551; COG0300 Short-chain dehydrogenase R General function prediction only ;}	{GO:0003824; NA GO:0044237; cellular metabolic process; biological_process GO:0055114; oxidation-reduction process; biological_process GO:0008677; 2-dehydropantoate 2-reductase activity; molecular_function GO:0008152; NA GO:0016491; oxidoreductase activity; molecular_function GO:0050662; coenzyme binding; molecular_function}	{NA}	{NA}
WP_012539995.1	{kpe:KPK_B0032; }	{YP_002235572; COG0456 Ribosomal protein S18 acetylase RimI and related acetyltransferases J Translation, ribosomal structure and biogenesis ;}	{GO:0008080; N-acetyltransferase activity; molecular_function GO:0016747; transferase activity, transferring acyl groups other than amino-acyl groups; molecular_function}	{NA}	{NA}
WP_012539996.1	{kpe:KPK_B0041; }	{NA}	{NA}	{NA}	{NA}
WP_012539997.1	{kox:KOX_24435; K09936 TC.BAT2 bacterial/archaeal transporter family-2 protein -- Cellular Processes; Cellular community - prokaryotes; Quorum sensing [PATH:ko02024] }	{YP_002235610; COG3238 Uncharacterized membrane protein YdcZ, DUF606 family S Function unknown ;}	{NA}	{NA}	{NA}
WP_012540002.1	{kpe:KPK_B0037; K11922 mngR, farR GntR family transcriptional regulator, mannosyl-D-glycerate transport/metabolism system repressor -- }	{YP_002235577; COG2188 DNA-binding transcriptional regulator, GntR family K Transcription ;}	{GO:0006355; regulation of transcription, DNA-dependent; biological_process GO:0003700; sequence-specific DNA binding transcription factor activity; molecular_function GO:0003677; DNA binding; molecular_function GO:0005622; intracellular; cellular_component}	{NA}	{NA}
WP_012540004.1	{kpe:KPK_B0024; }	{YP_002235565; COG4977 Transcriptional regulator GlxA family, contains an amidase domain and an AraC-type DNA-binding HTH domain K Transcription ;}	{GO:0006355; regulation of transcription, DNA-dependent; biological_process GO:0003700; sequence-specific DNA binding transcription factor activity; molecular_function GO:0043565; sequence-specific DNA binding; molecular_function}	{NA}	{NA}
WP_012540006.1	{kpe:KPK_B0072; }	{YP_002235609; COG0402 Cytosine/adenosine deaminase or related metal-dependent hydrolase FR Nucleotide transport and metabolism ; General function prediction only ;}	{GO:0016787; hydrolase activity; molecular_function}	{NA}	{NA}
WP_012540007.1	{kpe:KPK_B0038; }	{YP_002235578; COG1063 Threonine dehydrogenase or related Zn-dependent dehydrogenase ER Amino acid transport and metabolism ; General function prediction only ;}	{GO:0006813; potassium ion transport; biological_process GO:0055114; oxidation-reduction process; biological_process GO:0008270; zinc ion binding; molecular_function GO:0016491; oxidoreductase activity; molecular_function GO:0050660; flavin adenine dinucleotide binding; molecular_function}	{NA}	{NA}
WP_012540011.1	{kpe:KPK_B0010; K14189 dltE uncharacterized oxidoreductase 1.-.-.- }	{YP_002235552; COG3967 Short-chain dehydrogenase involved in D-alanine esterification of teichoic acids MI Cell wall/membrane/envelope biogenesis ; Lipid transport and metabolism ;}	{GO:0008831; dTDP-4-dehydrorhamnose reductase activity; molecular_function GO:0003824; NA GO:0044237; cellular metabolic process; biological_process GO:0016491; oxidoreductase activity; molecular_function GO:0050662; coenzyme binding; molecular_function GO:0045226; extracellular polysaccharide biosynthetic process; biological_process GO:0008152; NA}	{NA}	{NA}
WP_012540014.1	{elg:BH714_22560; }	{YP_002235605; COG2249 Putative NADPH-quinone reductase (modulator of drug activity B) R General function prediction only ;}	{GO:0016491; oxidoreductase activity; molecular_function}	{NA}	{NA}
WP_012540017.1	{kpe:KPK_B0011; }	{YP_002235553; COG2814 Predicted arabinose efflux permease, MFS family G Carbohydrate transport and metabolism ;}	{GO:0055085; transmembrane transport; biological_process GO:0016021; integral to membrane; cellular_component}	{NA}	{NA}
WP_012540018.1	{kpe:KPK_B0056; K07726 K07726 putative transcriptional regulator -- }	{YP_002235595; COG2944 DNA-binding transcriptional regulator YiaG, XRE-type HTH domain K Transcription ;}	{GO:0043565; sequence-specific DNA binding; molecular_function GO:0006355; regulation of transcription, DNA-dependent; biological_process GO:0003677; DNA binding; molecular_function}	{NA}	{NA}
WP_012540021.1	{kpe:KPK_B0006; }	{NA}	{NA}	{NA}	{NA}
WP_012540024.1	{kpe:KPK_B0002; }	{NA}	{NA}	{NA}	{NA}
WP_012540026.1	{kpe:KPK_B0075; }	{YP_002235612; COG0702 Uncharacterized conserved protein YbjT, contains NAD(P)-binding and DUF2867 domains R General function prediction only ;}	{GO:0016491; oxidoreductase activity; molecular_function GO:0050660; flavin adenine dinucleotide binding; molecular_function GO:0055114; oxidation-reduction process; biological_process GO:0003824; NA}	{NA}	{NA}
WP_012540027.1	{kpe:KPK_B0025; }	{YP_002235566; COG0693 Putative intracellular protease/amidase R General function prediction only ;}	{NA}	{NA}	{NA}
WP_012540028.1	{kpe:KPK_B0003; }	{YP_002235545; COG2207 AraC-type DNA-binding domain and AraC-containing proteins K Transcription ;}	{GO:0006355; regulation of transcription, DNA-dependent; biological_process GO:0003700; sequence-specific DNA binding transcription factor activity; molecular_function GO:0003677; DNA binding; molecular_function GO:0043565; sequence-specific DNA binding; molecular_function}	{NA}	{NA}
WP_012540029.1	{kpe:KPK_B0074; K13874 K13874, araB L-arabinonolactonase 3.1.1.15 Metabolism; Carbohydrate metabolism; Ascorbate and aldarate metabolism [PATH:ko00053] }	{YP_002235611; COG3386 Sugar lactone lactonase YvrE G Carbohydrate transport and metabolism ;}	{NA}	{NA}	{NA}
WP_012540035.1	{kpe:KPK_B0084; }	{NA}	{GO:0006355; regulation of transcription, DNA-dependent; biological_process}	{NA}	{NA}
WP_012540041.1	{kpe:KPK_A0091; }	{NA}	{NA}	{NA}	{NA}
WP_012540042.1	{kpe:KPK_A0162; }	{NA}	{NA}	{NA}	{NA}
WP_012540045.1	{kpe:KPK_A0220; }	{NA}	{NA}	{NA}	{NA}
WP_012540046.1	{kpe:KPK_A0036; }	{NA}	{NA}	{NA}	{NA}
WP_012540047.1	{kpe:KPK_A0219; }	{NA}	{NA}	{NA}	{NA}
WP_012540048.1	{kpe:KPK_A0189; }	{NA}	{NA}	{NA}	{NA}
WP_012540049.1	{kpe:KPK_A0133; }	{YP_002235781; COG5653 Acetyltransferase involved in cellulose biosynthesis, CelD/BcsL family N Cell motility ;}	{NA}	{NA}	{NA}
WP_012540051.1	{kpe:KPK_A0183; }	{YP_002235824; COG1525 Endonuclease YncB, thermonuclease family L Replication, recombination and repair ;}	{GO:0003676; nucleic acid binding; molecular_function GO:0016788; hydrolase activity, acting on ester bonds; molecular_function}	{NA}	{NA}
WP_012540053.1	{kpe:KPK_A0019; }	{NA}	{GO:0003677; DNA binding; molecular_function GO:0007067; mitosis; biological_process GO:0051382; kinetochore assembly; biological_process}	{NA}	{NA}
WP_012540057.1	{kpe:KPK_A0087; }	{NA}	{NA}	{NA}	{NA}
WP_012540061.1	{kpe:KPK_A0126; K02024 lamB maltoporin -- }	{YP_002235774; COG4580 Maltoporin (phage lambda and maltose receptor) G Carbohydrate transport and metabolism ;}	{GO:0006810; transport; biological_process GO:0016020; membrane; cellular_component}	{NA}	{NA}
WP_012540062.1	{kpe:KPK_A0210; }	{NA}	{NA}	{NA}	{NA}
WP_012540065.1	{kpe:KPK_A0084; }	{NA}	{GO:0045892; negative regulation of transcription, DNA-dependent; biological_process GO:0043565; sequence-specific DNA binding; molecular_function GO:0003677; DNA binding; molecular_function}	{NA}	{NA}
WP_012540068.1	{kpe:KPK_A0069; }	{NA}	{NA}	{NA}	{NA}
WP_012540069.1	{kpe:KPK_A0067; }	{NA}	{NA}	{NA}	{NA}
WP_012540072.1	{kpe:KPK_A0235; }	{NA}	{NA}	{NA}	{NA}
WP_012540073.1	{kpe:KPK_A0196; }	{YP_002235836; COG2310 Stress response protein SCP2 T Signal transduction mechanisms ;}	{GO:0006950; response to stress; biological_process}	{NA}	{NA}
WP_012540076.1	{kpe:KPK_A0089; }	{NA}	{NA}	{NA}	{NA}
WP_012540077.1	{kpe:KPK_A0212; }	{YP_002235852; COG2310 Stress response protein SCP2 T Signal transduction mechanisms ;}	{GO:0006950; response to stress; biological_process}	{NA}	{NA}
WP_012540081.1	{kpe:KPK_A0166; }	{NA}	{GO:0016055; Wnt receptor signaling pathway; biological_process}	{NA}	{NA}
WP_012540082.1	{kpe:KPK_A0083; }	{NA}	{GO:0008289; lipid binding; molecular_function GO:0042157; lipoprotein metabolic process; biological_process GO:0006869; lipid transport; biological_process GO:0005576; NA}	{NA}	{NA}
WP_012540084.1	{kpe:KPK_A0026; }	{NA}	{NA}	{NA}	{NA}
WP_012540091.1	{kpe:KPK_A0079; }	{NA}	{GO:0010333; terpene synthase activity; molecular_function GO:0016829; lyase activity; molecular_function GO:0008152; NA}	{NA}	{NA}
WP_012540092.1	{kpe:KPK_A0179; }	{NA}	{NA}	{NA}	{NA}
WP_012540093.1	{kpe:KPK_A0122; }	{NA}	{NA}	{NA}	{NA}
WP_012540095.1	{kpe:KPK_A0214; }	{YP_002235854; COG4245 Uncharacterized conserved protein YegL, contains vWA domain of TerY type S Function unknown ;}	{GO:0006355; regulation of transcription, DNA-dependent; biological_process GO:0008270; zinc ion binding; molecular_function GO:0005634; nucleus; cellular_component}	{NA}	{NA}
WP_012540096.1	{kpe:KPK_A0155; }	{YP_004847139; COG1715 Restriction endonuclease Mrr V Defense mechanisms ;}	{GO:0004519; endonuclease activity; molecular_function GO:0003677; DNA binding; molecular_function GO:0009307; DNA restriction-modification system; biological_process}	{NA}	{NA}
WP_012540097.1	{kpe:KPK_A0081; }	{NA}	{NA}	{NA}	{NA}
WP_012540102.1	{kpe:KPK_A0120; K05349 bglX beta-glucosidase 3.2.1.21 Metabolism; Metabolism of other amino acids; Cyanoamino acid metabolism [PATH:ko00460] Metabolism; Carbohydrate metabolism; Starch and sucrose metabolism [PATH:ko00500] Metabolism; Biosynthesis of other secondary metabolites; Phenylpropanoid biosynthesis [PATH:ko00940] }	{YP_002235768; COG1472 Periplasmic beta-glucosidase and related glycosidases G Carbohydrate transport and metabolism ;}	{GO:0004553; hydrolase activity, hydrolyzing O-glycosyl compounds; molecular_function GO:0005975; carbohydrate metabolic process; biological_process}	{NA}	{NA}
WP_012540103.1	{kpe:KPK_A0216; }	{YP_002235856; COG4248 Uncharacterized protein with protein kinase and helix-hairpin-helix DNA-binding domains R General function prediction only ;}	{GO:0016773; phosphotransferase activity, alcohol group as acceptor; molecular_function GO:0004672; protein kinase activity; molecular_function GO:0009103; lipopolysaccharide biosynthetic process; biological_process GO:0005524; ATP binding; molecular_function GO:0003824; NA GO:0006468; protein phosphorylation; biological_process GO:0016020; membrane; cellular_component}	{NA}	{NA}
WP_012540105.1	{kpe:KPK_A0146; }	{YP_002235792; COG2814 Predicted arabinose efflux permease, MFS family G Carbohydrate transport and metabolism ;}	{GO:0016021; integral to membrane; cellular_component GO:0055085; transmembrane transport; biological_process}	{NA}	{NA}
WP_012540108.1	{kpe:KPK_A0209; }	{NA}	{GO:0009236; cobalamin biosynthetic process; biological_process GO:0006355; regulation of transcription, DNA-dependent; biological_process GO:0046872; metal ion binding; molecular_function GO:0003700; sequence-specific DNA binding transcription factor activity; molecular_function GO:0016829; lyase activity; molecular_function GO:0005622; intracellular; cellular_component GO:0051304; chromosome se…	{NA}	{NA}
WP_012540113.1	{kpe:KPK_A0205; }	{YP_002235845; COG0561 Hydroxymethylpyrimidine pyrophosphatase and other HAD family phosphatases HR Coenzyme transport and metabolism ; General function prediction only ;}	{GO:0003824; NA GO:0005992; trehalose biosynthetic process; biological_process}	{NA}	{NA}
WP_012540116.1	{kpe:KPK_A0112; }	{YP_002238447; COG0697 Permease of the drug/metabolite transporter (DMT) superfamily GER Carbohydrate transport and metabolism ; Amino acid transport and metabolism ; General function prediction only ;}	{NA}	{NA}	{NA}
WP_012540117.1	{kpe:KPK_A0077; K06919 K06919 putative DNA primase/helicase -- }	{YP_002235725; COG3378 Phage- or plasmid-associated DNA primase X Mobilome: prophages, transposons;}	{GO:0003677; DNA binding; molecular_function GO:0006355; regulation of transcription, DNA-dependent; biological_process}	{NA}	{NA}
WP_012540119.1	{kpe:KPK_A0192; }	{NA}	{GO:0015078; hydrogen ion transmembrane transporter activity; molecular_function GO:0015986; ATP synthesis coupled proton transport; biological_process GO:0000276; mitochondrial proton-transporting ATP synthase complex, coupling factor F(o); cellular_component}	{NA}	{NA}
WP_012540121.1	{kpe:KPK_A0149; }	{NA}	{NA}	{NA}	{NA}
WP_012540131.1	{kpe:KPK_A0135; K12678 aidA-I, misL autotransporter family porin -- }	{YP_002235783; COG3468 Type V secretory pathway, adhesin AidA MU Cell wall/membrane/envelope biogenesis ; Intracellular trafficking, secretion, and vesicular transport ;}	{NA}	{VFG035988; CVF743 EhaA, AIDA-I type ehaA autotransporter - - - -}	{NA}
WP_012540133.1	{kpe:KPK_A0230; }	{NA}	{NA}	{NA}	{NA}
WP_012540134.1	{kpe:KPK_A0211; }	{YP_002235851; COG4245 Uncharacterized conserved protein YegL, contains vWA domain of TerY type S Function unknown ;}	{NA}	{NA}	{NA}
WP_012540135.1	{kpe:KPK_A0188; }	{NA}	{NA}	{NA}	{NA}
WP_012540139.1	{kpe:KPK_A0224; }	{YP_002235862; COG1961 Site-specific DNA recombinase related to the DNA invertase Pin L Replication, recombination and repair ;}	{GO:0000150; recombinase activity; molecular_function GO:0006355; regulation of transcription, DNA-dependent; biological_process GO:0016987; sigma factor activity; molecular_function GO:0003677; DNA binding; molecular_function GO:0003700; sequence-specific DNA binding transcription factor activity; molecular_function GO:0006310; DNA recombination; biological_process GO:0006352; transcription init…	{NA}	{NA}
WP_012540140.1	{kpe:KPK_A0221; }	{NA}	{GO:0008270; zinc ion binding; molecular_function}	{NA}	{NA}
WP_012540142.1	{kpe:KPK_A0184; }	{NA}	{GO:0016757; transferase activity, transferring glycosyl groups; molecular_function}	{NA}	{NA}
WP_012540143.1	{kpe:KPK_A0160; }	{YP_002235805; COG0178 Excinuclease UvrABC ATPase subunit L Replication, recombination and repair ;}	{GO:0016887; ATPase activity; molecular_function GO:0005524; ATP binding; molecular_function GO:0005179; hormone activity; molecular_function GO:0005576; NA}	{NA}	{NA}
WP_012540144.1	{kpe:KPK_A0152; K13408 raxA membrane fusion protein -- Organismal Systems; Environmental adaptation; Plant-pathogen interaction [PATH:ko04626] }	{YP_002235798; COG0845 Multidrug efflux pump subunit AcrA (membrane-fusion protein) MV Cell wall/membrane/envelope biogenesis ; Defense mechanisms ;}	{GO:0055085; transmembrane transport; biological_process GO:0016020; membrane; cellular_component}	{NA}	{NA}
WP_012540147.1	{kpe:KPK_A0021; }	{NA}	{NA}	{NA}	{NA}
WP_012540150.1	{kpe:KPK_A0246; }	{NA}	{NA}	{NA}	{NA}
WP_012540152.1	{kpe:KPK_A0005; }	{NA}	{NA}	{NA}	{NA}
WP_012540158.1	{kpe:KPK_A0243; }	{NA}	{NA}	{NA}	{NA}
WP_012540159.1	{kpe:KPK_A0176; }	{NA}	{NA}	{NA}	{NA}
WP_012540161.1	{kpe:KPK_A0131; K01223 E3.2.1.86B, bglA 6-phospho-beta-glucosidase 3.2.1.86 Metabolism; Carbohydrate metabolism; Glycolysis / Gluconeogenesis [PATH:ko00010] Metabolism; Carbohydrate metabolism; Starch and sucrose metabolism [PATH:ko00500] }	{YP_002235779; COG2723 Beta-glucosidase/6-phospho-beta-glucosidase/beta-galactosidase G Carbohydrate transport and metabolism ;}	{GO:0004553; hydrolase activity, hydrolyzing O-glycosyl compounds; molecular_function GO:0005975; carbohydrate metabolic process; biological_process}	{NA}	{NA}
WP_012540162.1	{kpe:KPK_A0127; }	{NA}	{NA}	{NA}	{NA}
WP_012540164.1	{kpe:KPK_A0085; }	{NA}	{NA}	{NA}	{NA}
WP_012540167.1	{kpe:KPK_A0203; }	{YP_002235843; COG0189 Glutathione synthase/RimK-type ligase, ATP-grasp superfamily HJ Coenzyme transport and metabolism ; Translation, ribosomal structure and biogenesis ;}	{GO:0046872; metal ion binding; molecular_function GO:0005524; ATP binding; molecular_function}	{NA}	{NA}
WP_012540175.1	{kpe:KPK_A0190; }	{NA}	{NA}	{NA}	{NA}
WP_012540176.1	{kpe:KPK_A0124; K02529 lacI, galR LacI family transcriptional regulator -- }	{YP_002235772; COG1609 DNA-binding transcriptional regulator, LacI/PurR family K Transcription ;}	{GO:0005622; intracellular; cellular_component GO:0043565; sequence-specific DNA binding; molecular_function GO:0006355; regulation of transcription, DNA-dependent; biological_process GO:0003700; sequence-specific DNA binding transcription factor activity; molecular_function GO:0003677; DNA binding; molecular_function}	{NA}	{NA}
WP_012540178.1	{kpe:KPK_A0199; K05794 terC tellurite resistance protein TerC -- }	{YP_002235839; COG0861 Membrane protein TerC, possibly involved in tellurium resistance P Inorganic ion transport and metabolism ;}	{GO:0016021; integral to membrane; cellular_component}	{NA}	{NA}
WP_012540180.1	{kpe:KPK_A0078; }	{NA}	{NA}	{NA}	{NA}
WP_012540182.1	{kpe:KPK_A0121; K01179 E3.2.1.4 endoglucanase 3.2.1.4 Metabolism; Carbohydrate metabolism; Starch and sucrose metabolism [PATH:ko00500] }	{YP_289685; COG5297 Cellulase/cellobiase CelA1 G Carbohydrate transport and metabolism ;}	{GO:0008810; cellulase activity; molecular_function GO:0005975; carbohydrate metabolic process; biological_process GO:0016798; hydrolase activity, acting on glycosyl bonds; molecular_function GO:0004553; hydrolase activity, hydrolyzing O-glycosyl compounds; molecular_function}	{NA}	{NA}
WP_012540185.1	{kpe:KPK_A0201; K05792 terA tellurite resistance protein TerA -- }	{YP_002235841; COG4110 Uncharacterized protein involved in tellurium resistance V Defense mechanisms ;}	{GO:0006950; response to stress; biological_process}	{NA}	{NA}
WP_012540186.1	{kpe:KPK_A0165; }	{NA}	{NA}	{NA}	{NA}
WP_012540187.1	{kpe:KPK_A0144; }	{NA}	{NA}	{NA}	{NA}
WP_012540188.1	{kpe:KPK_A0088; }	{NA}	{NA}	{NA}	{NA}
WP_012540189.1	{kpe:KPK_A0011; }	{NA}	{NA}	{NA}	{NA}
WP_012540190.1	{kpe:KPK_A0193; }	{NA}	{NA}	{NA}	{NA}
WP_012540191.1	{kpe:KPK_A0207; }	{YP_002235847; COG2301 Citrate lyase beta subunit G Carbohydrate transport and metabolism ;}	{NA}	{NA}	{NA}
WP_012540196.1	{kpe:KPK_A0119; }	{NA}	{NA}	{NA}	{NA}
WP_012540199.1	{kpe:KPK_A0082; }	{NA}	{NA}	{NA}	{NA}
WP_012540204.1	{kpe:KPK_A0090; }	{NA}	{NA}	{NA}	{NA}
WP_012540208.1	{kpe:KPK_A0172; }	{NA}	{NA}	{NA}	{NA}
WP_012540215.1	{kpe:KPK_A0215; }	{YP_002235855; COG0631 Serine/threonine protein phosphatase PrpC T Signal transduction mechanisms ;}	{NA}	{NA}	{NA}
WP_012540217.1	{kpe:KPK_A0076; }	{NA}	{NA}	{NA}	{NA}
WP_012540223.1	{kpe:KPK_A0202; K05791 terZ tellurium resistance protein TerZ -- }	{YP_002235842; COG2310 Stress response protein SCP2 T Signal transduction mechanisms ;}	{GO:0006950; response to stress; biological_process}	{NA}	{NA}
WP_012540224.1	{kpe:KPK_A0206; }	{NA}	{GO:0009116; nucleoside metabolic process; biological_process}	{NA}	{NA}
WP_012540225.1	{kpe:KPK_A0187; }	{NA}	{NA}	{NA}	{NA}
WP_012540226.1	{kpe:KPK_A0161; }	{YP_002235806; COG4694 Wobble nucleotide-excising tRNase J Translation, ribosomal structure and biogenesis ;}	{GO:0005524; ATP binding; molecular_function GO:0003677; DNA binding; molecular_function GO:0016887; ATPase activity; molecular_function GO:0030261; chromosome condensation; biological_process GO:0007059; chromosome segregation; biological_process GO:0009295; nucleoid; cellular_component GO:0016301; kinase activity; molecular_function}	{NA}	{NA}
WP_012540229.1	{kpe:KPK_A0117; }	{NA}	{NA}	{NA}	{NA}
WP_012540230.1	{kpe:KPK_A0072; }	{NA}	{NA}	{NA}	{NA}
WP_012540231.1	{kpe:KPK_A0125; }	{NA}	{GO:0042597; periplasmic space; cellular_component GO:0008643; carbohydrate transport; biological_process}	{NA}	{NA}
WP_012540232.1	{kpe:KPK_A0236; }	{NA}	{NA}	{NA}	{NA}
WP_012540234.1	{kpe:KPK_A0035; }	{NA}	{NA}	{NA}	{NA}
WP_012540236.1	{kpe:KPK_A0092; }	{NP_931538; COG1396 Transcriptional regulator, contains XRE-family HTH domain K Transcription ;}	{NA}	{NA}	{NA}
WP_012540240.1	{kpe:KPK_A0020; }	{YP_002235672; COG3464 Transposase X Mobilome: prophages, transposons;}	{GO:0003677; DNA binding; molecular_function GO:0004803; transposase activity; molecular_function GO:0006313; transposition, DNA-mediated; biological_process}	{NA}	{NA}
WP_012540241.1	{kpe:KPK_A0113; }	{NA}	{NA}	{NA}	{NA}
WP_012540243.1	{kpe:KPK_A0208; }	{NA}	{NA}	{NA}	{NA}
WP_012540244.1	{kpe:KPK_A0218; }	{NA}	{NA}	{NA}	{NA}
WP_012540245.1	{kpe:KPK_A0159; }	{NA}	{NA}	{NA}	{NA}
WP_012540385.1	{kpe:KPK_0291; }	{NA}	{NA}	{NA}	{NA}
WP_012540386.1	{kpe:KPK_0292; K03744 lemA LemA protein -- }	{YP_002236174; COG1704 Uncharacterized conserved protein S Function unknown ;}	{NA}	{NA}	{NA}
WP_012540549.1	{kpe:KPK_0697; K01061 E3.1.1.45 carboxymethylenebutenolidase 3.1.1.45 Metabolism; Xenobiotics biodegradation and metabolism; Chlorocyclohexane and chlorobenzene degradation [PATH:ko00361] Metabolism; Xenobiotics biodegradation and metabolism; Fluorobenzoate degradation [PATH:ko00364] Metabolism; Xenobiotics biodegradation and metabolism; Toluene degradation [PATH:ko00623] }	{YP_002236571; COG0412 Dienelactone hydrolase Q Secondary metabolites biosynthesis, transport and catabolism ;}	{GO:0006508; proteolysis; biological_process GO:0016787; hydrolase activity; molecular_function GO:0008236; serine-type peptidase activity; molecular_function GO:0004177; aminopeptidase activity; molecular_function GO:0008152; NA}	{NA}	{NA}
WP_012540598.1	{kpe:KPK_0784; }	{YP_002236656; COG0582 Integrase LX Replication, recombination and repair ; Mobilome: prophages, transposons;}	{GO:0015074; DNA integration; biological_process GO:0006310; DNA recombination; biological_process GO:0003677; DNA binding; molecular_function}	{NA}	{NA}
WP_012540599.1	{kpe:KPK_0785; }	{NA}	{NA}	{NA}	{NA}
WP_012540600.1	{kpe:KPK_0786; }	{YP_002236658; COG3646 Phage regulatory protein Rha X Mobilome: prophages, transposons;}	{GO:0003677; DNA binding; molecular_function}	{NA}	{NA}
WP_012540601.1	{kpe:KPK_0787; }	{NA}	{NA}	{NA}	{NA}
WP_012540602.1	{kpe:KPK_0788; }	{NA}	{NA}	{NA}	{NA}
WP_012540699.1	{kpe:KPK_0939; K11891 impL, vasK, icmF type VI secretion system protein ImpL -- Cellular Processes; Cellular community - prokaryotes; Biofilm formation - Pseudomonas aeruginosa [PATH:ko02025] Environmental Information Processing; Membrane transport; Bacterial secretion system [PATH:ko03070] }	{YP_002236811; COG3523 Type VI protein secretion system component VasK U Intracellular trafficking, secretion, and vesicular transport ;}	{NA}	{VFG035247; CVF734 SCI-I T6SS ECS88_3097 hypothetical protein - - - -}	{NA}
WP_012540700.1	{kpe:KPK_0940; }	{NA}	{NA}	{NA}	{NA}
WP_012540701.1	{kpe:KPK_0941; }	{NA}	{NA}	{NA}	{NA}
WP_012540702.1	{kpe:KPK_0942; }	{NA}	{NA}	{NA}	{NA}
WP_012540703.1	{kpe:KPK_0943; }	{YP_002236815; COG1075 Triacylglycerol esterase/lipase EstA, alpha/beta hydrolase fold I Lipid transport and metabolism ;}	{GO:0006629; lipid metabolic process; biological_process GO:0006886; intracellular protein transport; biological_process GO:0006505; GPI anchor metabolic process; biological_process GO:0016788; hydrolase activity, acting on ester bonds; molecular_function GO:0008374; O-acyltransferase activity; molecular_function}	{NA}	{NA}
WP_012540705.1	{kpe:KPK_0945; }	{YP_002236817; COG2885 Outer membrane protein OmpA and related peptidoglycan-associated (lipo)proteins M Cell wall/membrane/envelope biogenesis ;}	{NA}	{VFG035162; CVF734 SCI-I T6SS ECNA114_2857 hypothetical protein - - - -}	{NA}
WP_012540819.1	{kpe:KPK_1160; }	{YP_002237024; COG4870 Cysteine protease, C1A family O Posttranslational modification, protein turnover, chaperones ;}	{GO:0006032; chitin catabolic process; biological_process GO:0008234; cysteine-type peptidase activity; molecular_function GO:0016998; cell wall macromolecule catabolic process; biological_process GO:0006508; proteolysis; biological_process GO:0004568; chitinase activity; molecular_function}	{NA}	{NA}
WP_012540827.1	{kpe:KPK_1168; }	{YP_002237032; COG0662 Mannose-6-phosphate isomerase, cupin superfamily G Carbohydrate transport and metabolism ;}	{GO:0005506; iron ion binding; molecular_function GO:0005976; polysaccharide metabolic process; biological_process GO:0000334; 3-hydroxyanthranilate 3,4-dioxygenase activity; molecular_function GO:0045735; NA GO:0055114; oxidation-reduction process; biological_process GO:0016779; nucleotidyltransferase activity; molecular_function GO:0010309; acireductone dioxygenase [iron(II)-requiring] activity…	{NA}	{NA}
WP_012540828.1	{kpe:KPK_1169; }	{YP_002237033; COG1917 Cupin domain protein related to quercetin dioxygenase R General function prediction only ;}	{GO:0043565; sequence-specific DNA binding; molecular_function GO:0003677; DNA binding; molecular_function}	{NA}	{NA}
WP_012540831.1	{kpe:KPK_1172; K07459 ybjD putative ATP-dependent endonuclease of the OLD family -- }	{YP_002237036; COG3593 Predicted ATP-dependent endonuclease of the OLD family, contains P-loop ATPase and TOPRIM domains L Replication, recombination and repair ;}	{NA}	{NA}	{NA}
WP_012540832.1	{kpe:KPK_1173; }	{YP_002237037; COG0210 Superfamily I DNA or RNA helicase L Replication, recombination and repair ;}	{GO:0019079; viral genome replication; biological_process GO:0008026; ATP-dependent helicase activity; molecular_function GO:0005524; ATP binding; molecular_function GO:0016787; hydrolase activity; molecular_function}	{NA}	{NA}
WP_012540833.1	{kpe:KPK_1174; }	{YP_002237038; COG4928 Predicted P-loop ATPase, KAP-like R General function prediction only ;}	{GO:0016773; phosphotransferase activity, alcohol group as acceptor; molecular_function GO:0006139; nucleobase, nucleoside, nucleotide and nucleic acid metabolic process; biological_process GO:0016301; kinase activity; molecular_function GO:0005524; ATP binding; molecular_function GO:0016887; ATPase activity; molecular_function}	{NA}	{NA}
WP_012540834.1	{kpe:KPK_1175; }	{NA}	{NA}	{NA}	{NA}
WP_012540835.1	{kpe:KPK_1176; }	{YP_002237040; COG0603 7-cyano-7-deazaguanine synthase (queuosine biosynthesis) J Translation, ribosomal structure and biogenesis ;}	{NA}	{NA}	{NA}
WP_012540836.1	{kpe:KPK_1177; }	{NA}	{NA}	{NA}	{NA}
WP_012540876.1	{kpe:KPK_1267; }	{NA}	{NA}	{NA}	{NA}
WP_012540887.1	{kpe:KPK_1287; K07505 repA regulatory protein RepA -- }	{YP_002237147; COG3598 RecA-family ATPase L Replication, recombination and repair ;}	{GO:0006260; DNA replication; biological_process GO:0003678; DNA helicase activity; molecular_function GO:0005524; ATP binding; molecular_function}	{NA}	{NA}
WP_012540888.1	{kpe:KPK_1288; }	{NA}	{NA}	{NA}	{NA}
WP_012540889.1	{kpe:KPK_1289; K07344 trbL type IV secretion system protein TrbL -- Cellular Processes; Cellular community - prokaryotes; Quorum sensing [PATH:ko02024] }	{YP_002237149; COG3846 Type IV secretory pathway, TrbL components U Intracellular trafficking, secretion, and vesicular transport ;}	{GO:0030255; protein secretion by the type IV secretion system; biological_process}	{NA}	{NA}
WP_012540890.1	{kpe:KPK_1290; K20266 trbJ type IV secretion system protein TrbJ -- Cellular Processes; Cellular community - prokaryotes; Quorum sensing [PATH:ko02024] }	{YP_002237150; COG5314 Conjugal transfer/entry exclusion protein X Mobilome: prophages, transposons;}	{GO:0004345; glucose-6-phosphate dehydrogenase activity; molecular_function GO:0006006; glucose metabolic process; biological_process GO:0033856; pyridoxine 5'-phosphate synthase activity; molecular_function GO:0055114; oxidation-reduction process; biological_process GO:0006508; proteolysis; biological_process GO:0005737; cytoplasm; cellular_component GO:0008615; pyridoxine biosynthetic process; …	{NA}	{NA}
WP_012540891.1	{kpe:KPK_1291; }	{NA}	{GO:0070193; synaptonemal complex organization; biological_process GO:0007130; synaptonemal complex assembly; biological_process GO:0000795; synaptonemal complex; cellular_component GO:0007128; meiotic prophase I; biological_process}	{NA}	{NA}
WP_012540893.1	{kpe:KPK_1294; }	{YP_002237154; COG5606 Predicted DNA-binding protein, XRE-type HTH domain R General function prediction only ;}	{GO:0043565; sequence-specific DNA binding; molecular_function GO:0003677; DNA binding; molecular_function}	{NA}	{NA}
WP_012540894.1	{kpe:KPK_1295; }	{YP_002237155; COG1040 Predicted amidophosphoribosyltransferases R General function prediction only ;}	{GO:0009116; nucleoside metabolic process; biological_process}	{NA}	{NA}
WP_012540896.1	{kpe:KPK_1297; }	{NA}	{GO:0007018; microtubule-based movement; biological_process GO:0005868; cytoplasmic dynein complex; cellular_component}	{NA}	{NA}
WP_012540897.1	{kpe:KPK_1298; }	{YP_002237158; COG3636 DNA-binding prophage protein X Mobilome: prophages, transposons;}	{NA}	{NA}	{NA}
WP_012540900.1	{kpe:KPK_1305; }	{NA}	{NA}	{NA}	{NA}
WP_012540903.1	{kpe:KPK_1308; }	{YP_002237168; COG5434 Polygalacturonase G Carbohydrate transport and metabolism ;}	{GO:0004650; polygalacturonase activity; molecular_function GO:0005975; carbohydrate metabolic process; biological_process}	{NA}	{NA}
WP_012540934.1	{kpe:KPK_1364; }	{YP_002237224; COG2852 Very-short-patch-repair endonuclease L Replication, recombination and repair ;}	{GO:0008982; protein-N(PI)-phosphohistidine-sugar phosphotransferase activity; molecular_function}	{NA}	{NA}
WP_012540987.1	{kpe:KPK_1485; K02348 elaA ElaA protein -- }	{YP_002237338; COG2153 Predicted N-acyltransferase, GNAT family R General function prediction only ;}	{GO:0008080; N-acetyltransferase activity; molecular_function}	{NA}	{NA}
WP_012541080.1	{kpe:KPK_1657; K19431 epsO pyruvyl transferase EpsO 2.-.-.- }	{YP_002237508; COG5039 Exopolysaccharide biosynthesis protein EpsI, predicted pyruvyl transferase GM Carbohydrate transport and metabolism ; Cell wall/membrane/envelope biogenesis ;}	{NA}	{NA}	{NA}
WP_012541081.1	{kpe:KPK_1658; }	{YP_002237509; COG2244 Membrane protein involved in the export of O-antigen and teichoic acid M Cell wall/membrane/envelope biogenesis ;}	{GO:0016020; membrane; cellular_component GO:0000271; polysaccharide biosynthetic process; biological_process}	{NA}	{NA}
WP_012541082.1	{kpe:KPK_1659; }	{YP_002237510; COG0297 Glycogen synthase G Carbohydrate transport and metabolism ;}	{GO:0009058; biosynthetic process; biological_process}	{NA}	{NA}
WP_012541084.1	{kpe:KPK_1661; }	{YP_002237512; COG0438 Glycosyltransferase involved in cell wall bisynthesis M Cell wall/membrane/envelope biogenesis ;}	{GO:0009058; biosynthetic process; biological_process}	{NA}	{NA}
WP_012541085.1	{kpe:KPK_1662; }	{YP_002237513; COG0438 Glycosyltransferase involved in cell wall bisynthesis M Cell wall/membrane/envelope biogenesis ;}	{GO:0009058; biosynthetic process; biological_process}	{NA}	{NA}
WP_012541086.1	{kpe:KPK_1663; }	{YP_002237514; COG1922 UDP-N-acetyl-D-mannosaminuronic acid transferase, WecB/TagA/CpsF family M Cell wall/membrane/envelope biogenesis ;}	{GO:0009058; biosynthetic process; biological_process}	{NA}	{NA}
WP_012541087.1	{kpe:KPK_1664; }	{NA}	{NA}	{NA}	{NA}
WP_012541088.1	{kpe:KPK_1665; }	{YP_002237516; COG3594 Fucose 4-O-acetylase or related acetyltransferase G Carbohydrate transport and metabolism ;}	{GO:0016747; transferase activity, transferring acyl groups other than amino-acyl groups; molecular_function}	{NA}	{NA}
WP_012541092.1	{kpe:KPK_1671; }	{NA}	{GO:0016747; transferase activity, transferring acyl groups other than amino-acyl groups; molecular_function}	{NA}	{NA}
WP_012541143.1	{kpe:KPK_1758; }	{NA}	{NA}	{NA}	{NA}
WP_012541144.1	{kpe:KPK_1759; }	{NA}	{NA}	{NA}	{NA}
WP_012541153.1	{kpe:KPK_1768; }	{YP_002237615; COG4974 Site-specific recombinase XerD L Replication, recombination and repair ;}	{GO:0015074; DNA integration; biological_process GO:0006310; DNA recombination; biological_process GO:0003677; DNA binding; molecular_function}	{NA}	{NA}
WP_012541154.1	{kpe:KPK_1769; }	{YP_002237616; COG0582 Integrase LX Replication, recombination and repair ; Mobilome: prophages, transposons;}	{GO:0003677; DNA binding; molecular_function GO:0015074; DNA integration; biological_process GO:0006310; DNA recombination; biological_process}	{NA}	{NA}
WP_012541155.1	{kpe:KPK_1770; }	{YP_002237617; COG4974 Site-specific recombinase XerD L Replication, recombination and repair ;}	{GO:0003677; DNA binding; molecular_function GO:0015074; DNA integration; biological_process GO:0006310; DNA recombination; biological_process}	{NA}	{NA}
WP_012541156.1	{kpe:KPK_1771; K00571 E2.1.1.72 site-specific DNA-methyltransferase (adenine-specific) 2.1.1.72 }	{YP_002237618; COG2521 Predicted archaeal methyltransferase R General function prediction only ;}	{GO:0006306; DNA methylation; biological_process GO:0003677; DNA binding; molecular_function GO:0008168; methyltransferase activity; molecular_function GO:0008152; NA GO:0008170; N-methyltransferase activity; molecular_function}	{NA}	{NA}
WP_012541157.1	{kpe:KPK_1772; }	{NA}	{NA}	{NA}	{NA}
WP_012541161.1	{kpe:KPK_1776; K03195 virB10, lvhB10 type IV secretion system protein VirB10 -- Environmental Information Processing; Membrane transport; Bacterial secretion system [PATH:ko03070] }	{YP_002237623; COG2948 Type IV secretory pathway, VirB10 components U Intracellular trafficking, secretion, and vesicular transport ;}	{NA}	{NA}	{NA}
WP_012541163.1	{kpe:KPK_1778; K03203 virB8, lvhB8 type IV secretion system protein VirB8 -- Environmental Information Processing; Membrane transport; Bacterial secretion system [PATH:ko03070] }	{YP_002237625; COG3736 Type IV secretory pathway, component VirB8 U Intracellular trafficking, secretion, and vesicular transport ;}	{GO:0016020; membrane; cellular_component GO:0004519; endonuclease activity; molecular_function GO:0006298; mismatch repair; biological_process}	{NA}	{NA}
WP_012541165.1	{kpe:KPK_1780; K03201 virB6, lvhB6 type IV secretion system protein VirB6 -- Environmental Information Processing; Membrane transport; Bacterial secretion system [PATH:ko03070] }	{YP_002237627; COG3704 Type IV secretory pathway, VirB6 components U Intracellular trafficking, secretion, and vesicular transport ;}	{GO:0030255; protein secretion by the type IV secretion system; biological_process}	{NA}	{NA}
WP_012541166.1	{kpe:KPK_1781; }	{NA}	{NA}	{NA}	{NA}
WP_012541167.1	{kpe:KPK_1782; K03200 virB5, lvhB5 type IV secretion system protein VirB5 -- Environmental Information Processing; Membrane transport; Bacterial secretion system [PATH:ko03070] }	{NA}	{GO:0005861; troponin complex; cellular_component}	{NA}	{NA}
WP_012541175.1	{kpe:KPK_1790; }	{NA}	{NA}	{NA}	{NA}
WP_012541176.1	{kpe:KPK_1791; }	{YP_002237638; COG2211 Na+/melibiose symporter or related transporter G Carbohydrate transport and metabolism ;}	{GO:0022857; transmembrane transporter activity; molecular_function GO:0016021; integral to membrane; cellular_component GO:0055085; transmembrane transport; biological_process}	{NA}	{NA}
WP_012541177.1	{kpe:KPK_1792; }	{NA}	{GO:0046872; metal ion binding; molecular_function GO:0005524; ATP binding; molecular_function}	{NA}	{NA}
WP_012541178.1	{kpe:KPK_1793; K00102 LDHD, dld D-lactate dehydrogenase (cytochrome) 1.1.2.4 Metabolism; Carbohydrate metabolism; Pyruvate metabolism [PATH:ko00620] }	{YP_002237640; COG0277 FAD/FMN-containing dehydrogenase C Energy production and conversion ;}	{GO:0050660; flavin adenine dinucleotide binding; molecular_function GO:0016491; oxidoreductase activity; molecular_function GO:0008762; UDP-N-acetylmuramate dehydrogenase activity; molecular_function GO:0055114; oxidation-reduction process; biological_process GO:0003824; NA}	{NA}	{NA}
WP_012541179.1	{kpe:KPK_1794; }	{NA}	{NA}	{NA}	{NA}
WP_012541180.1	{kpe:KPK_1795; K01872 AARS, alaS alanyl-tRNA synthetase 6.1.1.7 Genetic Information Processing; Translation; Aminoacyl-tRNA biosynthesis [PATH:ko00970] }	{YP_002237642; COG2872 Ser-tRNA(Ala) deacylase AlaX (editing enzyme) J Translation, ribosomal structure and biogenesis ;}	{GO:0016876; ligase activity, forming aminoacyl-tRNA and related compounds; molecular_function GO:0000166; nucleotide binding; molecular_function GO:0005524; ATP binding; molecular_function GO:0043039; tRNA aminoacylation; biological_process GO:0004813; alanine-tRNA ligase activity; molecular_function GO:0006419; alanyl-tRNA aminoacylation; biological_process}	{NA}	{NA}
WP_012541181.1	{kpe:KPK_1796; K00817 hisC histidinol-phosphate aminotransferase 2.6.1.9 Metabolism; Amino acid metabolism; Histidine metabolism [PATH:ko00340] Metabolism; Amino acid metabolism; Tyrosine metabolism [PATH:ko00350] Metabolism; Amino acid metabolism; Phenylalanine metabolism [PATH:ko00360] Metabolism; Amino acid metabolism; Phenylalanine, tyrosine and tryptophan biosynthesis [PATH:ko00400] Metaboli…	{YP_002237643; COG0079 Histidinol-phosphate/aromatic aminotransferase or cobyric acid decarboxylase E Amino acid transport and metabolism ;}	{GO:0019031; viral envelope; cellular_component GO:0030170; pyridoxal phosphate binding; molecular_function GO:0009058; biosynthetic process; biological_process GO:0016846; carbon-sulfur lyase activity; molecular_function}	{NA}	{NA}
WP_012541182.1	{kpe:KPK_1797; K01745 hutH, HAL histidine ammonia-lyase 4.3.1.3 Metabolism; Amino acid metabolism; Histidine metabolism [PATH:ko00340] }	{YP_002237644; COG2986 Histidine ammonia-lyase E Amino acid transport and metabolism ;}	{GO:0016841; ammonia-lyase activity; molecular_function GO:0009058; biosynthetic process; biological_process}	{NA}	{NA}
WP_012541183.1	{kpe:KPK_1798; }	{NA}	{GO:0055114; oxidation-reduction process; biological_process GO:0005506; iron ion binding; molecular_function GO:0016491; oxidoreductase activity; molecular_function}	{NA}	{NA}
WP_012541184.1	{kpe:KPK_1799; }	{YP_002237646; COG0582 Integrase LX Replication, recombination and repair ; Mobilome: prophages, transposons;}	{GO:0003677; DNA binding; molecular_function GO:0015074; DNA integration; biological_process GO:0006310; DNA recombination; biological_process}	{NA}	{NA}
WP_012541187.1	{kpe:KPK_1802; }	{YP_002237649; COG2303 Choline dehydrogenase or related flavoprotein IR Lipid transport and metabolism ; General function prediction only ;}	{GO:0008033; tRNA processing; biological_process GO:0016491; oxidoreductase activity; molecular_function GO:0016705; oxidoreductase activity, acting on paired donors, with incorporation or reduction of molecular oxygen; molecular_function GO:0050660; flavin adenine dinucleotide binding; molecular_function GO:0016117; carotenoid biosynthetic process; biological_process GO:0055114; oxidation-reduct…	{NA}	{NA}
WP_012541188.1	{kpe:KPK_1803; K03457 TC.NCS1 nucleobase:cation symporter-1, NCS1 family -- }	{YP_002237650; COG1457 Purine-cytosine permease or related protein F Nucleotide transport and metabolism ;}	{GO:0015851; nucleobase transport; biological_process GO:0015205; nucleobase transmembrane transporter activity; molecular_function GO:0016020; membrane; cellular_component}	{NA}	{NA}
WP_012541189.1	{kpe:KPK_1804; K07222 K07222 putative flavoprotein involved in K+ transport -- }	{YP_002237651; COG2072 Predicted flavoprotein CzcO associated with the cation diffusion facilitator CzcD P Inorganic ion transport and metabolism ;}	{GO:0055114; oxidation-reduction process; biological_process GO:0008677; 2-dehydropantoate 2-reductase activity; molecular_function GO:0003824; NA GO:0016491; oxidoreductase activity; molecular_function GO:0008033; tRNA processing; biological_process GO:0050661; NADP binding; molecular_function GO:0004499; flavin-containing monooxygenase activity; molecular_function GO:0006813; potassium ion tran…	{NA}	{NA}
WP_012541206.1	{kpe:KPK_1833; }	{NA}	{GO:0006313; transposition, DNA-mediated; biological_process GO:0004803; transposase activity; molecular_function GO:0003677; DNA binding; molecular_function}	{NA}	{NA}
WP_012541208.1	{kpe:KPK_1835; K08166 mmr MFS transporter, DHA2 family, methylenomycin A resistance protein -- }	{YP_002237679; COG0477 MFS family permease GEPR Carbohydrate transport and metabolism ; Amino acid transport and metabolism ; Inorganic ion transport and metabolism ; General function prediction only ;}	{GO:0016021; integral to membrane; cellular_component GO:0055085; transmembrane transport; biological_process}	{NA}	{NA}
WP_012541209.1	{kpe:KPK_1836; }	{YP_002237680; COG0583 DNA-binding transcriptional regulator, LysR family K Transcription ;}	{GO:0006355; regulation of transcription, DNA-dependent; biological_process GO:0003700; sequence-specific DNA binding transcription factor activity; molecular_function}	{NA}	{NA}
WP_012541211.1	{kpe:KPK_1838; }	{YP_002237682; COG3320 Thioester reductase domain of alpha aminoadipate reductase Lys2 and NRPSs Q Secondary metabolites biosynthesis, transport and catabolism ;}	{GO:0055114; oxidation-reduction process; biological_process GO:0003824; NA GO:0003854; 3-beta-hydroxy-delta5-steroid dehydrogenase activity; molecular_function GO:0016491; oxidoreductase activity; molecular_function GO:0016616; oxidoreductase activity, acting on the CH-OH group of donors, NAD or NADP as acceptor; molecular_function GO:0044237; cellular metabolic process; biological_process GO:00…	{NA}	{NA}
WP_012541212.1	{kpe:KPK_1839; }	{YP_002237683; COG2814 Predicted arabinose efflux permease, MFS family G Carbohydrate transport and metabolism ;}	{GO:0055085; transmembrane transport; biological_process GO:0016021; integral to membrane; cellular_component}	{NA}	{NA}
WP_012541214.1	{kpe:KPK_1841; }	{YP_002237685; COG0583 DNA-binding transcriptional regulator, LysR family K Transcription ;}	{GO:0006355; regulation of transcription, DNA-dependent; biological_process GO:0003700; sequence-specific DNA binding transcription factor activity; molecular_function}	{NA}	{NA}
WP_012541325.1	{kpe:KPK_2047; }	{YP_002237886; COG1388 LysM repeat M Cell wall/membrane/envelope biogenesis ;}	{GO:0016998; cell wall macromolecule catabolic process; biological_process}	{NA}	{NA}
WP_012541326.1	{kpe:KPK_2049; }	{YP_002237888; COG0741 Soluble lytic murein transglycosylase and related regulatory proteins (some contain LysM/invasin domains) M Cell wall/membrane/envelope biogenesis ;}	{NA}	{NA}	{NA}
WP_012541364.1	{kpe:KPK_2130; }	{YP_002237967; COG1961 Site-specific DNA recombinase related to the DNA invertase Pin L Replication, recombination and repair ;}	{GO:0006310; DNA recombination; biological_process GO:0000150; recombinase activity; molecular_function GO:0003677; DNA binding; molecular_function}	{NA}	{NA}
WP_012541429.1	{kpe:KPK_2228; }	{YP_002238064; COG0251 Enamine deaminase RidA, house cleaning of reactive enamine intermediates, YjgF/YER057c/UK114 family V Defense mechanisms ;}	{NA}	{NA}	{NA}
WP_012541430.1	{kpe:KPK_2229; }	{YP_002238065; COG0477 MFS family permease GEPR Carbohydrate transport and metabolism ; Amino acid transport and metabolism ; Inorganic ion transport and metabolism ; General function prediction only ;}	{GO:0016021; integral to membrane; cellular_component GO:0022857; transmembrane transporter activity; molecular_function GO:0055085; transmembrane transport; biological_process}	{NA}	{NA}
WP_012541432.1	{kpe:KPK_2233; K03781 katE, CAT, catB, srpA catalase 1.11.1.6 Metabolism; Amino acid metabolism; Tryptophan metabolism [PATH:ko00380] Metabolism; Carbohydrate metabolism; Glyoxylate and dicarboxylate metabolism [PATH:ko00630] Environmental Information Processing; Signal transduction; MAPK signaling pathway - yeast [PATH:ko04011] Environmental Information Processing; Signal transduction; MAPK sign…	{YP_002238069; COG0753 Catalase P Inorganic ion transport and metabolism ;}	{GO:0004096; catalase activity; molecular_function GO:0020037; heme binding; molecular_function GO:0055114; oxidation-reduction process; biological_process}	{NA}	{NA}
WP_012541433.1	{kpe:KPK_2234; }	{NA}	{NA}	{NA}	{NA}
WP_012541434.1	{kpe:KPK_2235; K16137 nemR TetR/AcrR family transcriptional regulator, transcriptional repressor for nem operon -- }	{YP_002238071; COG1309 DNA-binding transcriptional regulator, AcrR family K Transcription ;}	{GO:0003677; DNA binding; molecular_function}	{NA}	{NA}
WP_012541435.1	{kpe:KPK_2236; }	{YP_002238072; COG0346 Catechol 2,3-dioxygenase or other lactoylglutathione lyase family enzyme Q Secondary metabolites biosynthesis, transport and catabolism ;}	{NA}	{NA}	{NA}
WP_012541436.1	{kpe:KPK_2237; }	{YP_002238073; COG0346 Catechol 2,3-dioxygenase or other lactoylglutathione lyase family enzyme Q Secondary metabolites biosynthesis, transport and catabolism ;}	{NA}	{NA}	{NA}
WP_012541455.1	{kpe:KPK_2261; }	{YP_002238096; COG0454 N-acetyltransferase, GNAT superfamily (includes histone acetyltransferase HPA2) KR Transcription ; General function prediction only ;}	{GO:0008080; N-acetyltransferase activity; molecular_function GO:0016747; transferase activity, transferring acyl groups other than amino-acyl groups; molecular_function}	{NA}	{NA}
WP_012541720.1	{kpe:KPK_2662; K00134 GAPDH, gapA glyceraldehyde 3-phosphate dehydrogenase 1.2.1.12 }	{YP_002238492; COG0057 Glyceraldehyde-3-phosphate dehydrogenase/erythrose-4-phosphate dehydrogenase G Carbohydrate transport and metabolism ;}	{GO:0016620; oxidoreductase activity, acting on the aldehyde or oxo group of donors, NAD or NADP as acceptor; molecular_function GO:0009089; lysine biosynthetic process via diaminopimelate; biological_process GO:0055114; oxidation-reduction process; biological_process GO:0016616; oxidoreductase activity, acting on the CH-OH group of donors, NAD or NADP as acceptor; molecular_function GO:0048037; …	{VFG005353; CVF123 Streptococcal plasmin receptor/GAPDH plr/gapA glyceraldehyde-3-phosphate dehydrogenase - - - -}	{NA}
WP_012541721.1	{kpe:KPK_2663; }	{YP_002238493; COG4977 Transcriptional regulator GlxA family, contains an amidase domain and an AraC-type DNA-binding HTH domain K Transcription ;}	{GO:0043565; sequence-specific DNA binding; molecular_function GO:0006355; regulation of transcription, DNA-dependent; biological_process GO:0003700; sequence-specific DNA binding transcription factor activity; molecular_function}	{NA}	{NA}
WP_012541815.1	{kpe:KPK_2831; }	{YP_002238658; COG4974 Site-specific recombinase XerD L Replication, recombination and repair ;}	{GO:0015074; DNA integration; biological_process GO:0006310; DNA recombination; biological_process GO:0003677; DNA binding; molecular_function}	{NA}	{NA}
WP_012541816.1	{kpe:KPK_2832; }	{YP_002238659; COG0582 Integrase LX Replication, recombination and repair ; Mobilome: prophages, transposons;}	{GO:0015074; DNA integration; biological_process GO:0006310; DNA recombination; biological_process GO:0003677; DNA binding; molecular_function}	{NA}	{NA}
WP_012541817.1	{kpe:KPK_2833; }	{NA}	{NA}	{NA}	{NA}
WP_012541818.1	{kpe:KPK_2834; }	{YP_002238661; COG2378 Predicted DNA-binding transcriptional regulator YafY, contains an HTH and WYL domains K Transcription ;}	{NA}	{NA}	{NA}
WP_012541819.1	{kpe:KPK_2835; }	{YP_002238662; COG2333 Metal-dependent hydrolase, beta-lactamase superfamily II R General function prediction only ;}	{NA}	{NA}	{NA}
WP_012541820.1	{kpe:KPK_2836; }	{YP_002238663; COG1310 Proteasome lid subunit RPN8/RPN11, contains Jab1/MPN domain metalloenzyme (JAMM) motif O Posttranslational modification, protein turnover, chaperones ;}	{GO:0003824; NA}	{NA}	{NA}
WP_012541828.1	{kpe:KPK_2844; }	{NA}	{NA}	{NA}	{NA}
WP_012541831.1	{kpe:KPK_2847; }	{NA}	{NA}	{NA}	{NA}
WP_012541833.1	{kpe:KPK_2849; }	{NA}	{NA}	{NA}	{NA}
WP_012541835.1	{kpe:KPK_2851; }	{YP_002238678; COG0484 DnaJ-class molecular chaperone with C-terminal Zn finger domain O Posttranslational modification, protein turnover, chaperones ;}	{GO:0003677; DNA binding; molecular_function GO:0006355; regulation of transcription, DNA-dependent; biological_process GO:0051082; unfolded protein binding; molecular_function GO:0006464; protein modification process; biological_process GO:0016151; nickel ion binding; molecular_function GO:0031072; heat shock protein binding; molecular_function}	{NA}	{NA}
WP_012541843.1	{kpe:KPK_2859; }	{YP_002238686; COG1403 5-methylcytosine-specific restriction endonuclease McrA V Defense mechanisms ;}	{GO:0004519; endonuclease activity; molecular_function GO:0003676; nucleic acid binding; molecular_function}	{NA}	{NA}
WP_012541846.1	{kpe:KPK_2862; }	{NA}	{GO:0006310; DNA recombination; biological_process GO:0003677; DNA binding; molecular_function}	{NA}	{NA}
WP_012541847.1	{kpe:KPK_2863; }	{YP_002238690; COG0582 Integrase LX Replication, recombination and repair ; Mobilome: prophages, transposons;}	{GO:0006310; DNA recombination; biological_process GO:0008907; integrase activity; molecular_function GO:0015074; DNA integration; biological_process GO:0003677; DNA binding; molecular_function}	{NA}	{NA}
WP_012542003.1	{kpe:KPK_3091; }	{NA}	{NA}	{NA}	{NA}
WP_012542028.1	{kpe:KPK_3126; }	{YP_002238951; COG2135 Putative SOS response-associated peptidase YedK O Posttranslational modification, protein turnover, chaperones ;}	{NA}	{NA}	{NA}
WP_012542031.1	{kpe:KPK_3129; }	{NA}	{NA}	{NA}	{NA}
WP_012542033.1	{kpe:KPK_3131; }	{NA}	{NA}	{NA}	{NA}
WP_012542034.1	{kpe:KPK_3132; }	{NA}	{NA}	{NA}	{NA}
WP_012542176.1	{kpe:KPK_3375; K18843 hicB antitoxin HicB -- }	{YP_002239198; COG1598 Predicted nuclease of the RNAse H fold, HicB family V Defense mechanisms ;}	{GO:0003677; DNA binding; molecular_function GO:0043565; sequence-specific DNA binding; molecular_function}	{NA}	{NA}
WP_012542177.1	{koc:AB185_14050; K07339 hicA mRNA interferase HicA 3.1.-.- }	{YP_001341554; COG1724 Predicted RNA binding protein YcfA, dsRBD-like fold, HicA-like mRNA interferase family R General function prediction only ;}	{GO:0003729; mRNA binding; molecular_function}	{NA}	{NA}
WP_012542179.1	{kpe:KPK_3379; }	{NA}	{GO:0005576; NA GO:0046872; metal ion binding; molecular_function GO:0009405; pathogenesis; biological_process GO:0003824; NA}	{NA}	{NA}
WP_012542180.1	{kpe:KPK_3378; K00558 DNMT1, dcm DNA (cytosine-5)-methyltransferase 1 2.1.1.37 Metabolism; Amino acid metabolism; Cysteine and methionine metabolism [PATH:ko00270] Human Diseases; Cancers; MicroRNAs in cancer [PATH:ko05206] }	{YP_002239202; COG0270 Site-specific DNA-cytosine methylase L Replication, recombination and repair ;}	{GO:0009452; RNA capping; biological_process GO:0001510; RNA methylation; biological_process GO:0008168; methyltransferase activity; molecular_function GO:0003677; DNA binding; molecular_function GO:0006306; DNA methylation; biological_process}	{NA}	{NA}
WP_012542181.1	{kpe:KPK_3380; }	{NA}	{GO:0060567; negative regulation of transcription termination, DNA-dependent; biological_process GO:0003677; DNA binding; molecular_function}	{NA}	{NA}
WP_012542188.1	{kpe:KPK_3387; }	{YP_002239210; COG2378 Predicted DNA-binding transcriptional regulator YafY, contains an HTH and WYL domains K Transcription ;}	{GO:0003700; sequence-specific DNA binding transcription factor activity; molecular_function GO:0003677; DNA binding; molecular_function GO:0006355; regulation of transcription, DNA-dependent; biological_process GO:0005622; intracellular; cellular_component}	{NA}	{NA}
WP_012542189.1	{kpe:KPK_3388; }	{YP_002239211; COG1028 NAD(P)-dependent dehydrogenase, short-chain alcohol dehydrogenase family IQR Lipid transport and metabolism ; Secondary metabolites biosynthesis, transport and catabolism ; General function prediction only ;}	{GO:0016491; oxidoreductase activity; molecular_function GO:0006631; fatty acid metabolic process; biological_process GO:0048037; cofactor binding; molecular_function GO:0055114; oxidation-reduction process; biological_process GO:0008918; lipopolysaccharide 3-alpha-galactosyltransferase activity; molecular_function GO:0003824; NA GO:0009058; biosynthetic process; biological_process GO:0050662; co…	{NA}	{NA}
WP_012542191.1	{kpe:KPK_3390; }	{YP_002239213; COG5515 Uncharacterized protein S Function unknown ;}	{NA}	{NA}	{NA}
WP_012542274.1	{kpe:KPK_3532; }	{NA}	{NA}	{NA}	{NA}
WP_012542572.1	{kpe:KPK_4109; }	{NA}	{NA}	{NA}	{NA}
WP_012542577.1	{kpe:KPK_4114; }	{NA}	{NA}	{NA}	{NA}
WP_012542579.1	{kpe:KPK_4116; }	{NA}	{NA}	{NA}	{NA}
WP_012542580.1	{kpe:KPK_4117; }	{NA}	{GO:0005515; protein binding; molecular_function}	{NA}	{NA}
WP_012542581.1	{kpe:KPK_4118; }	{YP_002239921; COG3299 Uncharacterized phage protein gp47/JayE X Mobilome: prophages, transposons;}	{NA}	{NA}	{NA}
WP_012542583.1	{kpe:KPK_4121; }	{NA}	{GO:0003677; DNA binding; molecular_function GO:0006355; regulation of transcription, DNA-dependent; biological_process}	{NA}	{NA}
WP_012542584.1	{kpe:KPK_4122; }	{NA}	{GO:0003677; DNA binding; molecular_function GO:0070403; NAD+ binding; molecular_function GO:0006464; protein modification process; biological_process GO:0016151; nickel ion binding; molecular_function GO:0006265; DNA topological change; biological_process GO:0046872; metal ion binding; molecular_function GO:0003824; NA GO:0004017; adenylate kinase activity; molecular_function GO:0003916; DNA top…	{NA}	{NA}
WP_012542585.1	{kpe:KPK_4123; }	{NA}	{NA}	{NA}	{NA}
WP_012542586.1	{kpe:KPK_4124; }	{NA}	{GO:0010038; response to metal ion; biological_process GO:0046938; phytochelatin biosynthetic process; biological_process GO:0016756; glutathione gamma-glutamylcysteinyltransferase activity; molecular_function GO:0046872; metal ion binding; molecular_function}	{NA}	{NA}
WP_012542587.1	{kpe:KPK_4127; }	{NA}	{NA}	{NA}	{NA}
WP_012542588.1	{kpe:KPK_4128; }	{YP_002239931; COG0741 Soluble lytic murein transglycosylase and related regulatory proteins (some contain LysM/invasin domains) M Cell wall/membrane/envelope biogenesis ;}	{NA}	{NA}	{NA}
WP_012542590.1	{kpe:KPK_4130; }	{NA}	{NA}	{NA}	{NA}
WP_012542591.1	{kpe:KPK_4131; }	{NA}	{NA}	{NA}	{NA}
WP_012542592.1	{kpe:KPK_4132; }	{NA}	{NA}	{NA}	{NA}
WP_012542593.1	{kpe:KPK_4133; }	{NA}	{NA}	{NA}	{NA}
WP_012542594.1	{kpe:KPK_4134; }	{NA}	{NA}	{NA}	{NA}
WP_012542595.1	{kpe:KPK_4135; }	{NA}	{NA}	{NA}	{NA}
WP_012542596.1	{kpe:KPK_4136; }	{NA}	{NA}	{NA}	{NA}
WP_012542597.1	{kpe:KPK_4137; }	{NA}	{GO:0001539; ciliary or flagellar motility; biological_process GO:0003774; motor activity; molecular_function GO:0009427; bacterial-type flagellum basal body, distal rod, L ring; cellular_component}	{NA}	{NA}
WP_012542598.1	{kpe:KPK_4138; }	{YP_003614043; COG4834 Uncharacterized protein S Function unknown ;}	{NA}	{NA}	{NA}
WP_012542599.1	{kpe:KPK_4139; }	{NA}	{NA}	{NA}	{NA}
WP_012542600.1	{kpe:KPK_4140; K09960 K09960 uncharacterized protein -- }	{YP_002239943; COG3566 Uncharacterized protein S Function unknown ;}	{GO:0003887; DNA-directed DNA polymerase activity; molecular_function GO:0005666; DNA-directed RNA polymerase III complex; cellular_component GO:0006270; DNA-dependent DNA replication initiation; biological_process GO:0005634; nucleus; cellular_component GO:0003899; DNA-directed RNA polymerase activity; molecular_function GO:0005669; transcription factor TFIID complex; cellular_component GO:00063…	{NA}	{NA}
WP_012542602.1	{kpe:KPK_4142; K09961 K09961 uncharacterized protein -- }	{YP_002239945; COG3567 Uncharacterized protein S Function unknown ;}	{NA}	{NA}	{NA}
WP_012542607.1	{kpe:KPK_4148; }	{NA}	{GO:0009271; phage shock; biological_process GO:0006355; regulation of transcription, DNA-dependent; biological_process}	{NA}	{NA}
WP_012542610.1	{kpe:KPK_4153; }	{NA}	{GO:0060567; negative regulation of transcription termination, DNA-dependent; biological_process GO:0003677; DNA binding; molecular_function}	{NA}	{NA}
WP_012542612.1	{kpe:KPK_4155; }	{NA}	{GO:0006355; regulation of transcription, DNA-dependent; biological_process GO:0005634; nucleus; cellular_component GO:0008270; zinc ion binding; molecular_function}	{NA}	{NA}
WP_012542617.1	{kpe:KPK_4160; }	{NA}	{NA}	{NA}	{NA}
WP_012542618.1	{kpe:KPK_4161; }	{NA}	{NA}	{NA}	{NA}
WP_012542623.1	{kpe:KPK_4166; }	{NA}	{NA}	{NA}	{NA}
WP_012542625.1	{kpe:KPK_4168; }	{NA}	{NA}	{NA}	{NA}
WP_012542631.1	{kpe:KPK_4175; }	{NA}	{GO:0043565; sequence-specific DNA binding; molecular_function GO:0006355; regulation of transcription, DNA-dependent; biological_process GO:0003700; sequence-specific DNA binding transcription factor activity; molecular_function GO:0003677; DNA binding; molecular_function}	{NA}	{NA}
WP_012542633.1	{kpe:KPK_4177; }	{NA}	{NA}	{NA}	{NA}
WP_012542636.1	{kpe:KPK_4180; }	{NA}	{NA}	{NA}	{NA}
WP_012542639.1	{kpe:KPK_4183; }	{YP_454768; COG0629 Single-stranded DNA-binding protein L Replication, recombination and repair ;}	{NA}	{NA}	{NA}
WP_012542640.1	{kpe:KPK_4184; }	{NA}	{NA}	{NA}	{NA}
WP_012542641.1	{kpe:KPK_4185; }	{NA}	{GO:0003677; DNA binding; molecular_function GO:0003700; sequence-specific DNA binding transcription factor activity; molecular_function GO:0016987; sigma factor activity; molecular_function GO:0006355; regulation of transcription, DNA-dependent; biological_process GO:0006352; transcription initiation, DNA-dependent; biological_process GO:0043565; sequence-specific DNA binding; molecular_function…	{NA}	{NA}
WP_012542642.1	{kpe:KPK_4186; }	{NA}	{NA}	{NA}	{NA}
WP_012542647.1	{kpe:KPK_4191; }	{NA}	{NA}	{NA}	{NA}
WP_012542741.1	{kpe:KPK_4412; }	{NA}	{NA}	{NA}	{NA}
WP_012542752.1	{kpe:KPK_4424; }	{NA}	{NA}	{NA}	{NA}
WP_012542754.1	{kpe:KPK_4429; }	{NA}	{NA}	{NA}	{NA}
WP_012542756.1	{kpe:KPK_4431; }	{NA}	{NA}	{NA}	{NA}
WP_012542757.1	{kpe:KPK_4432; }	{NA}	{NA}	{NA}	{NA}
WP_012542759.1	{kpe:KPK_4434; }	{NA}	{NA}	{NA}	{NA}
WP_012542760.1	{kpe:KPK_4435; }	{YP_002240234; COG4688 Uncharacterized protein S Function unknown ;}	{NA}	{NA}	{NA}
WP_012542762.1	{kpe:KPK_4437; }	{YP_002240236; COG0582 Integrase LX Replication, recombination and repair ; Mobilome: prophages, transposons;}	{GO:0006310; DNA recombination; biological_process GO:0015074; DNA integration; biological_process GO:0003677; DNA binding; molecular_function}	{NA}	{NA}
WP_012542769.1	{kpe:KPK_4447; K03497 parB, spo0J chromosome partitioning protein, ParB family -- }	{YP_002240246; COG1475 Chromosome segregation protein Spo0J, contains ParB-like nuclease domain D Cell cycle control, cell division, chromosome partitioning ;}	{NA}	{NA}	{NA}
WP_012542770.1	{kpe:KPK_4448; }	{YP_002240247; COG1961 Site-specific DNA recombinase related to the DNA invertase Pin L Replication, recombination and repair ;}	{GO:0000150; recombinase activity; molecular_function GO:0003677; DNA binding; molecular_function GO:0006310; DNA recombination; biological_process}	{NA}	{NA}
WP_012542778.1	{kpe:KPK_4467; K00880 lyxK L-xylulokinase 2.7.1.53 Metabolism; Carbohydrate metabolism; Pentose and glucuronate interconversions [PATH:ko00040] Metabolism; Carbohydrate metabolism; Ascorbate and aldarate metabolism [PATH:ko00053] }	{YP_002240266; COG1070 Sugar (pentulose or hexulose) kinase G Carbohydrate transport and metabolism ;}	{GO:0016773; phosphotransferase activity, alcohol group as acceptor; molecular_function GO:0005975; carbohydrate metabolic process; biological_process}	{NA}	{NA}
WP_012542779.1	{kpe:KPK_4468; }	{YP_002240267; COG1028 NAD(P)-dependent dehydrogenase, short-chain alcohol dehydrogenase family IQR Lipid transport and metabolism ; Secondary metabolites biosynthesis, transport and catabolism ; General function prediction only ;}	{GO:0008152; NA GO:0016491; oxidoreductase activity; molecular_function}	{NA}	{NA}
WP_012542780.1	{kpe:KPK_4469; K00058 serA, PHGDH D-3-phosphoglycerate dehydrogenase / 2-oxoglutarate reductase 1.1.1.95 1.1.1.399 Metabolism; Amino acid metabolism; Glycine, serine and threonine metabolism [PATH:ko00260] Metabolism; Energy metabolism; Methane metabolism [PATH:ko00680] }	{YP_002240268; COG0111 Phosphoglycerate dehydrogenase or related dehydrogenase HR Coenzyme transport and metabolism ; General function prediction only ;}	{GO:0048037; cofactor binding; molecular_function GO:0016616; oxidoreductase activity, acting on the CH-OH group of donors, NAD or NADP as acceptor; molecular_function GO:0055114; oxidation-reduction process; biological_process GO:0051287; NAD binding; molecular_function GO:0006098; pentose-phosphate shunt; biological_process GO:0004616; phosphogluconate dehydrogenase (decarboxylating) activity; …	{NA}	{NA}
WP_012542781.1	{kpe:KPK_4470; K02775 PTS-Gat-EIIC, gatC, sgcC PTS system, galactitol-specific IIC component -- Metabolism; Carbohydrate metabolism; Galactose metabolism [PATH:ko00052] Environmental Information Processing; Membrane transport; Phosphotransferase system (PTS) [PATH:ko02060] }	{YP_002240269; COG3775 Phosphotransferase system, galactitol-specific IIC component G Carbohydrate transport and metabolism ;}	{GO:0016021; integral to membrane; cellular_component GO:0009401; phosphoenolpyruvate-dependent sugar phosphotransferase system; biological_process}	{NA}	{NA}
WP_012542850.1	{kpe:KPK_4638; K03574 mutT, NUDT15, MTH2 8-oxo-dGTP diphosphatase 3.6.1.55 }	{YP_002240429; COG0494 8-oxo-dGTP pyrophosphatase MutT and related house-cleaning NTP pyrophosphohydrolases, NUDIX family V Defense mechanisms ;}	{GO:0006378; mRNA polyadenylation; biological_process GO:0016787; hydrolase activity; molecular_function GO:0003729; mRNA binding; molecular_function GO:0005849; mRNA cleavage factor complex; cellular_component}	{NA}	{NA}
WP_012542956.1	{kpe:KPK_4830; }	{NA}	{NA}	{NA}	{NA}
WP_012542979.1	{kpe:KPK_4870; K09803 K09803 uncharacterized protein -- }	{YP_002240655; COG2929 Uncharacterized conserved protein, DUF497 family S Function unknown ;}	{NA}	{NA}	{NA}
WP_012543025.1	{kpe:KPK_4933; }	{NA}	{NA}	{NA}	{NA}
WP_012543027.1	{kpe:KPK_4935; }	{YP_002240715; COG4104 Zn-binding Pro-Ala-Ala-Arg (PAAR) domain, incolved in TypeVI secretion U Intracellular trafficking, secretion, and vesicular transport ;}	{NA}	{NA}	{NA}
WP_012543028.1	{kpe:KPK_4939; }	{NA}	{NA}	{NA}	{NA}
WP_012543036.1	{kpe:KPK_4947; }	{NA}	{NA}	{NA}	{NA}
WP_012543038.1	{elg:BH714_17345; }	{YP_002240727; COG2378 Predicted DNA-binding transcriptional regulator YafY, contains an HTH and WYL domains K Transcription ;}	{GO:0003677; DNA binding; molecular_function GO:0003700; sequence-specific DNA binding transcription factor activity; molecular_function GO:0006355; regulation of transcription, DNA-dependent; biological_process GO:0005622; intracellular; cellular_component}	{NA}	{NA}
WP_012543045.1	{eclx:LI66_02720; }	{NA}	{NA}	{NA}	{NA}
WP_012543046.1	{kpe:KPK_4960; }	{NA}	{GO:0006886; intracellular protein transport; biological_process GO:0005622; intracellular; cellular_component}	{NA}	{NA}
WP_012543049.1	{kpe:KPK_4963; }	{YP_002240740; COG0346 Catechol 2,3-dioxygenase or other lactoylglutathione lyase family enzyme Q Secondary metabolites biosynthesis, transport and catabolism ;}	{NA}	{NA}	{NA}
WP_012543050.1	{kpe:KPK_4964; }	{YP_002240741; COG0456 Ribosomal protein S18 acetylase RimI and related acetyltransferases J Translation, ribosomal structure and biogenesis ;}	{GO:0008080; N-acetyltransferase activity; molecular_function GO:0016747; transferase activity, transferring acyl groups other than amino-acyl groups; molecular_function}	{NA}	{NA}
WP_012543055.1	{kpe:KPK_4969; }	{YP_002240746; COG2519 tRNA A58 N-methylase Trm61 J Translation, ribosomal structure and biogenesis ;}	{GO:0005737; cytoplasm; cellular_component GO:0008757; S-adenosylmethionine-dependent methyltransferase activity; molecular_function GO:0009312; oligosaccharide biosynthetic process; biological_process GO:0008168; methyltransferase activity; molecular_function GO:0009452; RNA capping; biological_process GO:0008276; protein methyltransferase activity; molecular_function GO:0004719; protein-L-isoas…	{NA}	{NA}
WP_012543056.1	{kpe:KPK_4970; }	{NA}	{GO:0009055; NA GO:0020037; heme binding; molecular_function}	{NA}	{NA}
WP_012543057.1	{kpe:KPK_4971; K07043 K07043 uncharacterized protein -- }	{YP_002240748; COG1451 Predicted metal-dependent hydrolase R General function prediction only ;}	{NA}	{NA}	{NA}
WP_012543058.1	{kpe:KPK_4972; K01153 hsdR type I restriction enzyme, R subunit 3.1.21.3 }	{YP_002240749; COG0610 Type I site-specific restriction-modification system, R (restriction) subunit and related helicases ... V Defense mechanisms ;}	{GO:0005524; ATP binding; molecular_function GO:0004519; endonuclease activity; molecular_function GO:0003677; DNA binding; molecular_function GO:0016787; hydrolase activity; molecular_function GO:0006304; DNA modification; biological_process}	{NA}	{NA}
WP_012543059.1	{kpe:KPK_4973; }	{YP_002240750; COG2110 O-acetyl-ADP-ribose deacetylase (regulator of RNase III), contains Macro domain J Translation, ribosomal structure and biogenesis ;}	{NA}	{NA}	{NA}
WP_012543060.1	{kpe:KPK_4974; }	{YP_002240751; COG4948 L-alanine-DL-glutamate epimerase or related enzyme of enolase superfamily MR Cell wall/membrane/envelope biogenesis ; General function prediction only ;}	{NA}	{NA}	{NA}
WP_012543061.1	{kpe:KPK_4975; K01154 hsdS type I restriction enzyme, S subunit 3.1.21.3 }	{YP_002240752; COG0732 Restriction endonuclease S subunit V Defense mechanisms ;}	{GO:0006304; DNA modification; biological_process GO:0003677; DNA binding; molecular_function}	{NA}	{NA}
WP_012543062.1	{kpe:KPK_4976; K03427 hsdM type I restriction enzyme M protein 2.1.1.72 }	{YP_002240753; COG0497 DNA repair ATPase RecN L Replication, recombination and repair ;}	{GO:0019028; viral capsid; cellular_component GO:0009007; site-specific DNA-methyltransferase (adenine-specific) activity; molecular_function GO:0005198; NA GO:0008170; N-methyltransferase activity; molecular_function GO:0006306; DNA methylation; biological_process GO:0008168; methyltransferase activity; molecular_function GO:0003677; DNA binding; molecular_function GO:0019031; viral envelope; ce…	{NA}	{NA}
WP_012543063.1	{yru:BD65_2421; }	{NA}	{NA}	{NA}	{NA}
WP_012543093.1	{kpe:KPK_5045; }	{NA}	{NA}	{NA}	{NA}
WP_012543121.1	{kpe:KPK_5125; }	{NA}	{GO:0015979; photosynthesis; biological_process GO:0009539; photosystem II reaction center; cellular_component GO:0016020; membrane; cellular_component GO:0009523; photosystem II; cellular_component}	{NA}	{NA}
WP_012543226.1	{kpe:KPK_5350; }	{YP_002241108; COG2188 DNA-binding transcriptional regulator, GntR family K Transcription ;}	{GO:0005622; intracellular; cellular_component GO:0006355; regulation of transcription, DNA-dependent; biological_process GO:0003700; sequence-specific DNA binding transcription factor activity; molecular_function GO:0003677; DNA binding; molecular_function}	{NA}	{NA}
WP_012543227.1	{kpe:KPK_5351; }	{YP_002241109; COG3119 Arylsulfatase A or related enzyme P Inorganic ion transport and metabolism ;}	{GO:0003824; NA GO:0008484; sulfuric ester hydrolase activity; molecular_function GO:0008152; NA}	{NA}	{NA}
WP_012543228.1	{kpe:KPK_5352; K02809 PTS-Scr-EIIB, scrA, sacP, sacX, ptsS PTS system, sucrose-specific IIB component 2.7.1.211 Metabolism; Carbohydrate metabolism; Starch and sucrose metabolism [PATH:ko00500] Environmental Information Processing; Membrane transport; Phosphotransferase system (PTS) [PATH:ko02060] }	{YP_002241110; COG1264 Phosphotransferase system IIB components G Carbohydrate transport and metabolism ;}	{GO:0016021; integral to membrane; cellular_component GO:0008982; protein-N(PI)-phosphohistidine-sugar phosphotransferase activity; molecular_function GO:0005351; sugar:hydrogen symporter activity; molecular_function GO:0016020; membrane; cellular_component GO:0009401; phosphoenolpyruvate-dependent sugar phosphotransferase system; biological_process GO:0051205; protein insertion into membrane; bi…	{NA}	{NA}
WP_012543229.1	{kpe:KPK_5353; }	{NA}	{NA}	{NA}	{NA}
WP_016160651.1	{hav:AT03_15290; }	{NA}	{NA}	{NA}	{NA}
WP_020078412.1	{kpe:KPK_1784; K03197 virB2, lvhB2 type IV secretion system protein VirB2 -- Environmental Information Processing; Membrane transport; Bacterial secretion system [PATH:ko03070] Human Diseases; Infectious diseases; Legionellosis [PATH:ko05134] }	{NA}	{NA}	{NA}	{NA}
WP_020803203.1	{kpe:KPK_3377; }	{YP_002239200; COG1479 Uncharacterized conserved protein, contains ParB-like and HNH nuclease domains S Function unknown ;}	{NA}	{NA}	{NA}
WP_023115105.1	{kpe:KPK_1285; }	{YP_002237145; COG0582 Integrase LX Replication, recombination and repair ; Mobilome: prophages, transposons;}	{GO:0006310; DNA recombination; biological_process GO:0015074; DNA integration; biological_process GO:0003677; DNA binding; molecular_function}	{NA}	{NA}
WP_023115107.1	{dzc:W909_14650; }	{NA}	{NA}	{NA}	{NA}
WP_029497484.1	{kpe:KPK_B0089; }	{NA}	{GO:0007049; cell cycle; biological_process}	{NA}	{NA}
WP_029602240.1	{hak:KO116_03943; K03424 tatD TatD DNase family protein 3.1.21.- }	{YP_005612988; COG0084 Tat protein secretion system quality control protein TatD (DNase activity) N Cell motility ;}	{GO:0000775; chromosome, centromeric region; cellular_component GO:0006355; regulation of transcription, DNA-dependent; biological_process GO:0003677; DNA binding; molecular_function GO:0016888; endodeoxyribonuclease activity, producing 5'-phosphomonoesters; molecular_function GO:0005634; nucleus; cellular_component GO:0003682; chromatin binding; molecular_function}	{NA}	{NA}
WP_031633086.1	{psg:G655_05915; }	{NA}	{GO:0043565; sequence-specific DNA binding; molecular_function GO:0003677; DNA binding; molecular_function GO:0006355; regulation of transcription, DNA-dependent; biological_process}	{NA}	{NA}
WP_032700860.1	{kpe:KPK_B0076; }	{YP_002235613; COG1733 DNA-binding transcriptional regulator, HxlR family K Transcription ;}	{GO:0003700; sequence-specific DNA binding transcription factor activity; molecular_function GO:0006355; regulation of transcription, DNA-dependent; biological_process GO:0005622; intracellular; cellular_component}	{NA}	{NA}
WP_032733488.1	{kpe:KPK_2050; }	{NA}	{NA}	{NA}	{NA}
WP_032755697.1	{kpe:KPK_1809; }	{NA}	{NA}	{NA}	{NA}
WP_038422052.1	{kpk:A593_13590; }	{NA}	{NA}	{NA}	{NA}
WP_039021687.1	{kpe:KPK_4433; }	{NA}	{NA}	{NA}	{NA}
WP_041165327.1	{kpk:A593_05645; K04095 fic cell filamentation protein -- }	{YP_002236899; COG2184 Fido, protein-threonine AMPylation domain T Signal transduction mechanisms ;}	{NA}	{NA}	{NA}
WP_041165333.1	{kpe:KPK_1307; K16210 togT, rhiT oligogalacturonide transporter -- }	{YP_002237167; COG2211 Na+/melibiose symporter or related transporter G Carbohydrate transport and metabolism ;}	{GO:0016021; integral to membrane; cellular_component GO:0055085; transmembrane transport; biological_process}	{NA}	{NA}
WP_041165334.1	{kpe:KPK_1660; }	{NA}	{NA}	{NA}	{NA}
WP_041165337.1	{kpe:KPK_1760; }	{YP_002237607; COG4581 Superfamily II RNA helicase L Replication, recombination and repair ;}	{GO:0005524; ATP binding; molecular_function GO:0008026; ATP-dependent helicase activity; molecular_function GO:0003677; DNA binding; molecular_function GO:0016787; hydrolase activity; molecular_function GO:0043303; mast cell degranulation; biological_process GO:0005576; NA GO:0004386; helicase activity; molecular_function GO:0009405; pathogenesis; biological_process GO:0003676; nucleic acid bind…	{NA}	{NA}
WP_041165338.1	{kpe:KPK_1762; }	{NA}	{NA}	{NA}	{NA}
WP_041165339.1	{kpe:KPK_1777; K03204 virB9, lvhB9 type IV secretion system protein VirB9 -- Environmental Information Processing; Membrane transport; Bacterial secretion system [PATH:ko03070] }	{YP_002237624; COG3504 Type IV secretory pathway, VirB9 components U Intracellular trafficking, secretion, and vesicular transport ;}	{NA}	{NA}	{NA}
WP_041165343.1	{kpe:KPK_1832; }	{NA}	{NA}	{NA}	{NA}
WP_041165367.1	{kpe:KPK_2829; }	{NA}	{NA}	{NA}	{NA}
WP_041165369.1	{kpe:KPK_2848; }	{NA}	{NA}	{NA}	{NA}
WP_041165391.1	{psts:E05_04060; }	{NA}	{NA}	{NA}	{NA}
WP_041165393.1	{elp:P12B_c2443; }	{NA}	{GO:0003677; DNA binding; molecular_function}	{NA}	{NA}
WP_041165395.1	{kpe:KPK_4141; }	{YP_002239944; COG2369 Uncharacterized conserved protein, contains phage Mu gpF-like domain S Function unknown ;}	{NA}	{NA}	{NA}
WP_041165396.1	{palh:B1H58_15425; }	{NA}	{GO:0003911; DNA ligase (NAD+) activity; molecular_function GO:0006260; DNA replication; biological_process GO:0006281; DNA repair; biological_process}	{NA}	{NA}
WP_041165398.1	{kpe:KPK_4162; }	{NA}	{NA}	{NA}	{NA}
WP_041165399.1	{kpe:KPK_4164; }	{NA}	{NA}	{NA}	{NA}
WP_041165400.1	{kpe:KPK_4167; }	{NA}	{NA}	{NA}	{NA}
WP_041165401.1	{kpe:KPK_4176; }	{YP_002239977; COG1974 SOS-response transcriptional repressor LexA (RecA-mediated autopeptidase) KT Transcription ; Signal transduction mechanisms ;}	{GO:0043565; sequence-specific DNA binding; molecular_function}	{NA}	{NA}
WP_041165405.1	{kpe:KPK_4436; }	{YP_002240235; COG0582 Integrase LX Replication, recombination and repair ; Mobilome: prophages, transposons;}	{GO:0006310; DNA recombination; biological_process GO:0015074; DNA integration; biological_process GO:0003677; DNA binding; molecular_function}	{NA}	{NA}
WP_041165411.1	{cfar:CI104_21745; K03630 radC DNA repair protein RadC -- }	{YP_002240722; COG2003 DNA repair protein RadC, contains a helix-hairpin-helix DNA-binding motif L Replication, recombination and repair ;}	{NA}	{NA}	{NA}
WP_041165417.1	{kqv:B8P98_26630; }	{NA}	{NA}	{NA}	{NA}
WP_041165445.1	{kqu:AVR78_14890; }	{NA}	{NA}	{NA}	{NA}
WP_041165451.1	{kpe:KPK_3133; K10906 recE exodeoxyribonuclease VIII 3.1.11.- }	{NA}	{GO:0003676; nucleic acid binding; molecular_function}	{NA}	{NA}
WP_041165460.1	{kpe:KPK_4115; }	{NA}	{NA}	{NA}	{NA}
WP_041165477.1	{kpe:KPK_A0032; }	{NA}	{NA}	{NA}	{NA}
WP_041165490.1	{NA}	{NA}	{NA}	{NA}	{NA}
WP_041165492.1	{kpe:KPK_A0147; }	{NA}	{NA}	{NA}	{NA}
WP_041165495.1	{kpe:KPK_A0163; }	{NA}	{NA}	{NA}	{NA}
WP_041165498.1	{NA}	{NA}	{NA}	{NA}	{NA}
WP_041165502.1	{kpe:KPK_A0233; }	{YP_002235870; COG0454 N-acetyltransferase, GNAT superfamily (includes histone acetyltransferase HPA2) KR Transcription ; General function prediction only ;}	{GO:0005576; NA GO:0005179; hormone activity; molecular_function GO:0008080; N-acetyltransferase activity; molecular_function GO:0016747; transferase activity, transferring acyl groups other than amino-acyl groups; molecular_function}	{NA}	{NA}
WP_041165518.1	{kpe:KPK_A0204; }	{YP_002235844; COG0503 Adenine/guanine phosphoribosyltransferase or related PRPP-binding protein F Nucleotide transport and metabolism ;}	{GO:0009116; nucleoside metabolic process; biological_process GO:0005524; ATP binding; molecular_function}	{NA}	{NA}
WP_041165522.1	{kpz:KPNIH27_28825; }	{NA}	{NA}	{NA}	{NA}
WP_041165533.1	{kpe:KPK_B0070; }	{YP_002235607; COG0583 DNA-binding transcriptional regulator, LysR family K Transcription ;}	{GO:0006355; regulation of transcription, DNA-dependent; biological_process GO:0003700; sequence-specific DNA binding transcription factor activity; molecular_function}	{NA}	{NA}
WP_048268134.1	{eci:UTI89_C3202; }	{YP_574304; COG4104 Zn-binding Pro-Ala-Ala-Arg (PAAR) domain, incolved in TypeVI secretion U Intracellular trafficking, secretion, and vesicular transport ;}	{NA}	{VFG035227; CVF734 SCI-I T6SS UTI89_C3202 hypothetical protein - - - -}	{NA}
WP_050774484.1	{kpe:KPK_1763; }	{NA}	{NA}	{NA}	{NA}
WP_050774487.1	{raa:Q7S_11840; }	{NA}	{NA}	{NA}	{NA}
WP_050774492.1	{kpe:KPK_2839; }	{NA}	{NA}	{NA}	{NA}
WP_050774496.1	{kvq:SP68_17590; }	{NA}	{NA}	{NA}	{NA}
WP_050774510.1	{cama:F384_24860; K06919 K06919 putative DNA primase/helicase -- }	{NA}	{NA}	{NA}	{NA}
WP_071583309.1	{NA}	{NA}	{NA}	{NA}	{NA}
WP_071822022.1	{kpy:KPNIH31_02040; }	{NA}	{NA}	{NA}	{NA}
WP_071822024.1	{kqu:AVR78_24765; }	{NA}	{NA}	{NA}	{NA}
WP_071822028.1	{NA}	{NA}	{NA}	{NA}	{NA}
WP_071822032.1	{kpe:KPK_1765; }	{NA}	{GO:0008170; N-methyltransferase activity; molecular_function GO:0046556; alpha-N-arabinofuranosidase activity; molecular_function GO:0003677; DNA binding; molecular_function GO:0046373; L-arabinose metabolic process; biological_process GO:0006306; DNA methylation; biological_process}	{NA}	{NA}
WP_071822033.1	{NA}	{NA}	{GO:0016021; integral to membrane; cellular_component GO:0055085; transmembrane transport; biological_process}	{NA}	{NA}
WP_071822034.1	{kqv:B8P98_09840; }	{NA}	{NA}	{NA}	{NA}
WP_071822035.1	{kin:AB182_10365; }	{NA}	{NA}	{NA}	{NA}
WP_071822041.1	{koc:AB185_23065; K03502 umuC DNA polymerase V -- }	{NA}	{GO:0006281; DNA repair; biological_process GO:0003887; DNA-directed DNA polymerase activity; molecular_function GO:0003684; damaged DNA binding; molecular_function}	{NA}	{NA}
WP_071822042.1	{kgo:CEW81_09430; }	{NA}	{GO:0017025; TBP-class protein binding; molecular_function}	{NA}	{NA}
WP_071822046.1	{kpe:KPK_3404; }	{NP_309530; COG5018 Inhibitor of the KinA pathway to sporulation, predicted exonuclease R General function prediction only ;}	{NA}	{NA}	{NA}
WP_071822056.1	{amh:I633_21250; }	{NA}	{NA}	{NA}	{NA}
WP_071822059.1	{kpr:KPR_0780; }	{NA}	{NA}	{NA}	{NA}
WP_071822067.1	{kps:KPNJ2_05410; }	{NA}	{NA}	{NA}	{NA}
WP_071822072.1	{ptt:VY86_13075; K19048 symE toxic protein SymE -- }	{NA}	{GO:0003723; RNA binding; molecular_function GO:0016788; hydrolase activity, acting on ester bonds; molecular_function GO:0016070; RNA metabolic process; biological_process GO:0005737; cytoplasm; cellular_component}	{NA}	{NA}
WP_071822073.1	{kgo:CEW81_24670; }	{NA}	{NA}	{NA}	{NA}
WP_071822081.1	{NA}	{NA}	{NA}	{NA}	{NA}
WP_071822082.1	{efe:EFER_p0003; }	{NA}	{NA}	{NA}	{NA}
WP_071822083.1	{NA}	{YP_008832471; COG0507 ATP-dependent exoDNAse (exonuclease V), alpha subunit, helicase superfamily I L Replication, recombination and repair ;}	{GO:0000746; conjugation; biological_process GO:0016818; hydrolase activity, acting on acid anhydrides, in phosphorus-containing anhydrides; molecular_function GO:0003677; DNA binding; molecular_function GO:0005524; ATP binding; molecular_function GO:0003678; DNA helicase activity; molecular_function}	{NA}	{NA}
WP_074193305.1	{kpa:KPNJ1_02463; }	{NA}	{NA}	{NA}	{NA}
WP_077251697.1	{kpe:KPK_1296; }	{NA}	{NA}	{NA}	{NA}
WP_077251700.1	{yal:AT01_1414; }	{NA}	{GO:0003677; DNA binding; molecular_function GO:0006313; transposition, DNA-mediated; biological_process GO:0004803; transposase activity; molecular_function}	{NA}	{NA}
WP_077251701.1	{pcv:BCS7_13530; K07486 K07486 transposase -- }	{YP_003712141; COG3547 Transposase X Mobilome: prophages, transposons;}	{GO:0006313; transposition, DNA-mediated; biological_process GO:0004803; transposase activity; molecular_function GO:0003677; DNA binding; molecular_function}	{NA}	{NA}
WP_077251702.1	{NA}	{NA}	{NA}	{NA}	{NA}
WP_077251703.1	{kpe:KPK_1834; }	{NA}	{NA}	{NA}	{NA}
WP_077251710.1	{kpe:KPK_2826; }	{YP_002238654; COG2135 Putative SOS response-associated peptidase YedK O Posttranslational modification, protein turnover, chaperones ;}	{NA}	{NA}	{NA}
WP_077251711.1	{enl:A3UG_12505; K07474 xtmA phage terminase small subunit -- }	{NP_266183; COG3728 Phage terminase, small subunit X Mobilome: prophages, transposons;}	{GO:0006323; DNA packaging; biological_process}	{NA}	{NA}
WP_077251724.1	{kpe:KPK_2576; }	{NA}	{NA}	{NA}	{NA}
WP_077251732.1	{koc:AB185_14755; }	{NA}	{NA}	{NA}	{NA}
WP_077251733.1	{kpe:KPK_A0145; }	{NA}	{NA}	{NA}	{NA}
WP_077251734.1	{NA}	{NA}	{NA}	{NA}	{NA}
WP_077251735.1	{ebi:EbC_26890; }	{YP_003278045; COG2826 Transposase and inactivated derivatives, IS30 family X Mobilome: prophages, transposons;}	{GO:0003677; DNA binding; molecular_function GO:0005524; ATP binding; molecular_function GO:0003700; sequence-specific DNA binding transcription factor activity; molecular_function GO:0016987; sigma factor activity; molecular_function GO:0006355; regulation of transcription, DNA-dependent; biological_process GO:0006352; transcription initiation, DNA-dependent; biological_process GO:0043565; seque…	{NA}	{NA}
WP_077251736.1	{kpc:KPNIH10_27780; }	{NA}	{GO:0015643; toxin binding; molecular_function}	{NA}	{NA}
WP_077251737.1	{kpe:KPK_A0227; }	{NA}	{NA}	{NA}	{NA}
WP_077251738.1	{kpe:KPK_B0042; K07497 K07497 putative transposase -- }	{YP_002235582; COG2801 Transposase InsO and inactivated derivatives X Mobilome: prophages, transposons;}	{GO:0015074; DNA integration; biological_process}	{NA}	{NA}
WP_077251739.1	{cro:ROD_05771; K07483 K07483 transposase -- }	{YP_003882543; COG2963 Transposase and inactivated derivatives X Mobilome: prophages, transposons;}	{GO:0019069; viral capsid assembly; biological_process GO:0004803; transposase activity; molecular_function GO:0006352; transcription initiation, DNA-dependent; biological_process GO:0005524; ATP binding; molecular_function GO:0003677; DNA binding; molecular_function GO:0003700; sequence-specific DNA binding transcription factor activity; molecular_function GO:0016987; sigma factor activity; mole…	{NA}	{NA}
WP_077251740.1	{kpk:A593_00130; }	{YP_007873385; COG0810 Periplasmic protein TonB, links inner and outer membranes M Cell wall/membrane/envelope biogenesis ;}	{GO:0006810; transport; biological_process}	{NA}	{NA}
WP_077598929.1	{koc:AB185_03870; }	{YP_002934364; COG3415 Transposase X Mobilome: prophages, transposons;}	{NA}	{NA}	{NA}

## Sheet: DX120E.unique genes
Gene_id	{nr}	{KEGG}	{COG}	{GO}	{VFDB}	{ARDB}
Annotation_num	272	266	99	127	3	0
WP_000026497.1	{WP_000026497.1; MULTISPECIES: hypothetical protein [Enterobacteriaceae|Escherichia coli]}	{kvd:KR75_26565; }	{NA}	{GO:0005525; GTP binding; molecular_function GO:0016887; ATPase activity; molecular_function GO:0003924; GTPase activity; molecular_function GO:0005524; ATP binding; molecular_function}	{NA}	{NA}
WP_000093087.1	{WP_000093087.1; DEAD-box ATP-dependent RNA helicase CshA (plasmid) [Klebsiella pneumoniae]}	{kom:HR38_27725; K03724 lhr ATP-dependent helicase Lhr and Lhr-like helicase 3.6.4.- }	{YP_129811; COG1201 Lhr-like helicase L Replication, recombination and repair ;}	{GO:0003676; nucleic acid binding; molecular_function GO:0004386; helicase activity; molecular_function GO:0003677; DNA binding; molecular_function GO:0008026; ATP-dependent helicase activity; molecular_function GO:0016787; hydrolase activity; molecular_function GO:0005524; ATP binding; molecular_function}	{NA}	{NA}
WP_000230161.1	{WP_000230161.1; MULTISPECIES: hypothetical protein [Enterobacteriaceae|Escherichia coli,|Klebsiella pneumoniae|Klebsiella pneumoniae,|Klebsiella sp.|Klebsiella variicola,]}	{kpv:KPNIH29_10180; }	{NA}	{NA}	{NA}	{NA}
WP_000421673.1	{WP_000421673.1; Tellurite resistance protein TerB (plasmid) [Klebsiella oxytoca|Klebsiella pneumoniae]}	{kvd:KR75_27045; }	{YP_129809; COG3793 Tellurite resistance protein P Inorganic ion transport and metabolism ;}	{GO:0004860; protein kinase inhibitor activity; molecular_function}	{NA}	{NA}
WP_000779146.1	{WP_000779146.1; Holliday junction resolvase / Crossover junction endodeoxyribonuclease rusA [Escherichia coli|Klebsiella oxytoca|Klebsiella pneumoniae|Klebsiella quasipneumoniae|Klebsiella sp.|Klebsiella variicola]}	{kqv:B8P98_17405; K01160 rusA crossover junction endodeoxyribonuclease RusA 3.1.22.4 }	{YP_003210091; COG4570 Holliday junction resolvase RusA (prophage-encoded endonuclease) L Replication, recombination and repair ;}	{GO:0006281; DNA repair; biological_process GO:0006310; DNA recombination; biological_process GO:0000287; magnesium ion binding; molecular_function}	{NA}	{NA}
WP_000931689.1	{EFJ98247.1; Uncharacterised protein [Enterobacter cloacae]}	{kvd:KR75_02310; }	{NA}	{NA}	{NA}	{NA}
WP_001191665.1	{WP_001191665.1; DNA-binding helix-turn-helix protein [Escherichia coli|Klebsiella pneumoniae|Klebsiella variicola]}	{ctu:CTU_17200; }	{YP_003210083; COG1396 Transcriptional regulator, contains XRE-family HTH domain K Transcription ;}	{GO:0003677; DNA binding; molecular_function GO:0043565; sequence-specific DNA binding; molecular_function}	{NA}	{NA}
WP_001445941.1	{WP_001445941.1; hypothetical protein [Citrobacter sp.|Escherichia coli|Escherichia coli,]}	{NA}	{NA}	{NA}	{NA}	{NA}
WP_002893017.1	{WP_002893017.1; N-acetylgalactosamine-specific PTS system EIIA component 2 [Escherichia coli]}	{kpa:KPNJ1_04034; K02793 PTS-Man-EIIA, manX PTS system, mannose-specific IIA component 2.7.1.191 Metabolism; Carbohydrate metabolism; Fructose and mannose metabolism [PATH:ko00051] Metabolism; Carbohydrate metabolism; Amino sugar and nucleotide sugar metabolism [PATH:ko00520] Environmental Information Processing; Membrane transport; Phosphotransferase system (PTS) [PATH:ko02060] }	{NP_459569; COG2893 Phosphotransferase system, mannose/fructose-specific component IIA G Carbohydrate transport and metabolism ;}	{GO:0009401; phosphoenolpyruvate-dependent sugar phosphotransferase system; biological_process GO:0016021; integral to membrane; cellular_component}	{NA}	{NA}
WP_004152200.1	{WP_004152200.1; MULTISPECIES: hypothetical protein [Klebsiella|Klebsiella oxytoca,|Klebsiella pneumoniae|Klebsiella pneumoniae,|Klebsiella variicola,|Raoultella planticola,]}	{kpc:KPNIH10_02785; }	{NA}	{GO:0016020; membrane; cellular_component GO:0016021; integral to membrane; cellular_component GO:0005789; endoplasmic reticulum membrane; cellular_component GO:0006506; GPI anchor biosynthetic process; biological_process GO:0016746; transferase activity, transferring acyl groups; molecular_function GO:0000148; 1,3-beta-D-glucan synthase complex; cellular_component GO:0006075; 1,3-beta-D-glucan b…	{NA}	{NA}
WP_004152201.1	{WP_004152201.1; MULTISPECIES: hypothetical protein [Klebsiella|Klebsiella oxytoca,|Klebsiella pneumoniae|Klebsiella pneumoniae,|Klebsiella variicola,]}	{kpa:KPNJ1_04918; }	{NA}	{GO:0006914; autophagy; biological_process GO:0005737; cytoplasm; cellular_component}	{NA}	{NA}
WP_004152291.1	{WP_004152291.1; hypothetical protein Kpn2146_5662 (plasmid) [Citrobacter sp.|Escherichia coli|Klebsiella oxytoca|Klebsiella pneumoniae|Klebsiella pneumoniae,|Klebsiella sp.]}	{kom:HR38_27720; }	{YP_001260363; COG1135 ABC-type methionine transport system, ATPase component E Amino acid transport and metabolism ;}	{NA}	{NA}	{NA}
WP_004176977.1	{WP_004176977.1; glucosamine--fructose-6-phosphate aminotransferase [Escherichia coli|Klebsiella pneumoniae]}	{kqu:AVR78_11360; }	{NP_459565; COG0449 Glucosamine 6-phosphate synthetase, contains amidotransferase and phosphosugar isomerase domains M Cell wall/membrane/envelope biogenesis ;}	{GO:0030246; carbohydrate binding; molecular_function GO:0005975; carbohydrate metabolic process; biological_process}	{NA}	{NA}
WP_004176978.1	{WP_004176978.1; MULTISPECIES: phosphosugar isomerase [Enterobacteriaceae|Klebsiella pneumoniae|Klebsiella sp.|Klebsiella variicola]}	{kvd:KR75_14615; }	{NP_459564; COG2222 Fructoselysine-6-P-deglycase FrlB and related proteins with duplicated sugar isomerase (SIS) domain M Cell wall/membrane/envelope biogenesis ;}	{GO:0005975; carbohydrate metabolic process; biological_process GO:0030246; carbohydrate binding; molecular_function}	{NA}	{NA}
WP_004183295.1	{WP_004183295.1; PTS system mannose-specific transporter subunit IIC [Klebsiella oxytoca|Klebsiella pneumoniae]}	{kpi:D364_02880; K02795 PTS-Man-EIIC, manY PTS system, mannose-specific IIC component -- Metabolism; Carbohydrate metabolism; Fructose and mannose metabolism [PATH:ko00051] Metabolism; Carbohydrate metabolism; Amino sugar and nucleotide sugar metabolism [PATH:ko00520] Environmental Information Processing; Membrane transport; Phosphotransferase system (PTS) [PATH:ko02060] }	{NP_459567; COG3715 Phosphotransferase system, mannose/fructose/N-acetylgalactosamine-specific component IIC G Carbohydrate transport and metabolism ;}	{GO:0016021; integral to membrane; cellular_component GO:0009401; phosphoenolpyruvate-dependent sugar phosphotransferase system; biological_process}	{NA}	{NA}
WP_004184757.1	{WP_004184757.1; MULTISPECIES: hypothetical protein [Enterobacteriaceae|Klebsiella pneumoniae|Klebsiella pneumoniae,|Klebsiella variicola,]}	{kpt:VK055_5147; }	{NA}	{NA}	{NA}	{NA}
WP_004184758.1	{WP_004184758.1; site-specific recombinase%2C phage integrase family protein [Escherichia coli|Klebsiella pneumoniae|Klebsiella variicola]}	{kvd:KR75_25780; }	{NP_310800; COG0582 Integrase LX Replication, recombination and repair ; Mobilome: prophages, transposons;}	{GO:0015074; DNA integration; biological_process GO:0003677; DNA binding; molecular_function GO:0006310; DNA recombination; biological_process}	{NA}	{NA}
WP_004202381.1	{WP_004202381.1; MULTISPECIES: hypothetical protein [Klebsiella|Klebsiella pneumoniae|Klebsiella pneumoniae,|Klebsiella quasipneumoniae|Klebsiella quasipneumoniae,|Klebsiella variicola,]}	{kpk:A593_16825; }	{NA}	{NA}	{NA}	{NA}
WP_004206787.1	{WP_004206787.1; dTDP-4-dehydrorhamnose reductase subunit, NAD(P)-binding, of dTDP-L-rhamnose synthase [Klebsiella pneumoniae|Klebsiella variicola]}	{kqu:AVR78_21720; K00067 rfbD, rmlD dTDP-4-dehydrorhamnose reductase 1.1.1.133 Metabolism; Biosynthesis of other secondary metabolites; Streptomycin biosynthesis [PATH:ko00521] Metabolism; Metabolism of terpenoids and polyketides; Polyketide sugar unit biosynthesis [PATH:ko00523] }	{YP_001141270; COG1091 dTDP-4-dehydrorhamnose reductase M Cell wall/membrane/envelope biogenesis ;}	{GO:0003824; NA GO:0050661; NADP binding; molecular_function GO:0008831; dTDP-4-dehydrorhamnose reductase activity; molecular_function GO:0009058; biosynthetic process; biological_process GO:0016491; oxidoreductase activity; molecular_function GO:0055114; oxidation-reduction process; biological_process GO:0045226; extracellular polysaccharide biosynthetic process; biological_process GO:0050662; c…	{NA}	{NA}
WP_008805532.1	{WP_008805532.1; NtrC family transcriptional regulator ATPase domain-containing protein [Klebsiella pneumoniae]}	{kvd:KR75_14610; }	{NP_459563; COG3933 Transcriptional regulatory protein LevR, contains PRD, AAA+ and EIIA domains K Transcription ;}	{GO:0008134; transcription factor binding; molecular_function GO:0003700; sequence-specific DNA binding transcription factor activity; molecular_function GO:0015995; chlorophyll biosynthetic process; biological_process GO:0006310; DNA recombination; biological_process GO:0016851; magnesium chelatase activity; molecular_function GO:0006281; DNA repair; biological_process GO:0009378; four-way junct…	{NA}	{NA}
WP_008805534.1	{WP_008805534.1; PTS system mannose-specific transporter subunit IIB [Klebsiella pneumoniae]}	{kvd:KR75_14635; K02794 PTS-Man-EIIB, manX PTS system, mannose-specific IIB component 2.7.1.191 Metabolism; Carbohydrate metabolism; Fructose and mannose metabolism [PATH:ko00051] Metabolism; Carbohydrate metabolism; Amino sugar and nucleotide sugar metabolism [PATH:ko00520] Environmental Information Processing; Membrane transport; Phosphotransferase system (PTS) [PATH:ko02060] }	{NP_459568; COG3444 Phosphotransferase system, mannose/fructose/N-acetylgalactosamine-specific component IIB G Carbohydrate transport and metabolism ;}	{GO:0009401; phosphoenolpyruvate-dependent sugar phosphotransferase system; biological_process GO:0008982; protein-N(PI)-phosphohistidine-sugar phosphotransferase activity; molecular_function GO:0005737; cytoplasm; cellular_component}	{NA}	{NA}
WP_008806485.1	{EFD84366.1; hypothetical protein [Klebsiella pneumoniae|Klebsiella pneumoniae,|Klebsiella sp.]}	{kvd:KR75_04585; }	{NA}	{NA}	{NA}	{NA}
WP_008806606.1	{WP_008806606.1; PTS system tagatose-specific transporter subunit IIA-TPr [Klebsiella pneumoniae]}	{kva:Kvar_0551; K11189 PTS-HPR phosphocarrier protein -- }	{NP_462169; COG4668 Mannitol/fructose-specific phosphotransferase system, IIA domain G Carbohydrate transport and metabolism ;}	{GO:0005351; sugar:hydrogen symporter activity; molecular_function GO:0009401; phosphoenolpyruvate-dependent sugar phosphotransferase system; biological_process}	{NA}	{NA}
WP_012967855.1	{WP_012967855.1; protein of unknown function DUF1233 excisionase putative [Klebsiella variicola At-22]}	{kpk:A593_00265; }	{NA}	{NA}	{NA}	{NA}
WP_012968299.1	{WP_012968299.1; protein of unknown function DUF900 hydrolase family protein [Klebsiella variicola At-22]}	{kva:Kvar_2763; }	{YP_004195945; COG4782 Esterase/lipase superfamily enzyme R General function prediction only ;}	{GO:0006629; lipid metabolic process; biological_process GO:0008374; O-acyltransferase activity; molecular_function}	{NA}	{NA}
WP_013087162.1	{WP_013087162.1; putative IS3 family transposase orfA (plasmid) [Enterobacter cloacae subsp. cloacae ATCC 13047]}	{enc:ECL_A094; K07483 K07483 transposase -- }	{YP_003602589; COG2963 Transposase and inactivated derivatives X Mobilome: prophages, transposons;}	{GO:0006313; transposition, DNA-mediated; biological_process GO:0004803; transposase activity; molecular_function GO:0003677; DNA binding; molecular_function}	{NA}	{NA}
WP_014228567.1	{WP_014228567.1; Protein of uncharacterised function (DUF1441) [Klebsiella oxytoca|Klebsiella pneumoniae]}	{kox:KOX_15475; }	{NA}	{NA}	{NA}	{NA}
WP_014228572.1	{WP_014228572.1; MULTISPECIES: hypothetical protein [Enterobacteriaceae|Escherichia coli,|Klebsiella michiganensis,|Klebsiella pneumoniae,]}	{kox:KOX_15500; }	{YP_003612210; COG5471 Predicted phage recombinase, RecA/RadA family X Mobilome: prophages, transposons;}	{NA}	{NA}	{NA}
WP_015958316.1	{WP_015958316.1; conserved membrane hypothetical protein [Klebsiella pneumoniae|Klebsiella pneumoniae,|Klebsiella quasipneumoniae|Klebsiella sp.|Klebsiella variicola|Klebsiella variicola,]}	{kpn:KPN_01429; }	{NA}	{GO:0016747; transferase activity, transferring acyl groups other than amino-acyl groups; molecular_function}	{NA}	{NA}
WP_016160970.1	{WP_016160970.1; MULTISPECIES: hypothetical protein [Klebsiella|Klebsiella sp.|Klebsiella variicola,]}	{kvd:KR75_20355; }	{NA}	{GO:0071771; aldehyde decarbonylase activity; molecular_function GO:0006355; regulation of transcription, DNA-dependent; biological_process GO:0005634; nucleus; cellular_component GO:0008270; zinc ion binding; molecular_function}	{NA}	{NA}
WP_020317294.1	{WP_020317294.1; MULTISPECIES: hypothetical protein [Enterobacteriaceae|Escherichia coli,|Klebsiella oxytoca|Klebsiella pneumoniae|Klebsiella pneumoniae,|Klebsiella variicola,]}	{kvd:KR75_25615; }	{NA}	{NA}	{NA}	{NA}
WP_020317329.1	{WP_020317329.1; phage portal protein%2C lambda family [Klebsiella pneumoniae|Klebsiella variicola]}	{kvd:KR75_25610; }	{YP_003612195; COG5511 Bacteriophage capsid protein X Mobilome: prophages, transposons;}	{GO:0003677; DNA binding; molecular_function GO:0019028; viral capsid; cellular_component}	{NA}	{NA}
WP_020317346.1	{WP_020317346.1; MULTISPECIES: phage tail protein [Klebsiella|Klebsiella pneumoniae|Klebsiella variicola]}	{kvd:KR75_25590; }	{NA}	{NA}	{NA}	{NA}
WP_020317349.1	{WP_020317349.1; MULTISPECIES: sugar ABC transporter ATP-binding protein [Enterobacteriaceae|Escherichia coli|Klebsiella pneumoniae|Klebsiella variicola]}	{kvd:KR75_25595; }	{NA}	{NA}	{NA}	{NA}
WP_023282477.1	{ESA97568.1; hypothetical protein [Klebsiella pneumoniae 909957, HMPREF1619_05013]}	{kpn:KPN_01384; }	{NA}	{GO:0046872; metal ion binding; molecular_function GO:0008270; zinc ion binding; molecular_function}	{NA}	{NA}
WP_023289577.1	{WP_023289577.1; MULTISPECIES: hypothetical protein [Klebsiella|Klebsiella pneumoniae|Klebsiella variicola,]}	{kvd:KR75_23915; }	{NA}	{NA}	{NA}	{NA}
WP_023304948.1	{ESM13267.1; conserved hypothetical protein [Klebsiella pneumoniae|Klebsiella pneumoniae,]}	{kor:AWR26_09710; }	{YP_003612214; COG5492 Uncharacterized conserved protein YjdB, contains Ig-like domain R General function prediction only ;}	{NA}	{NA}	{NA}
WP_023339381.1	{WP_023339381.1; plasmid-partitioning protein SopA (plasmid) [Klebsiella michiganensis|Klebsiella oxytoca|Klebsiella pneumoniae|Klebsiella variicola]}	{koc:AB185_00900; K03496 parA, soj chromosome partitioning protein -- }	{NP_052640; COG1192 Cellulose biosynthesis protein BcsQ N Cell motility ;}	{GO:0043565; sequence-specific DNA binding; molecular_function GO:0006355; regulation of transcription, DNA-dependent; biological_process GO:0003677; DNA binding; molecular_function}	{NA}	{NA}
WP_023339388.1	{WP_023339388.1; hypothetical protein MS6671_phi0340 (plasmid) [Klebsiella pneumoniae|Klebsiella pneumoniae,]}	{koc:AB185_00775; }	{NA}	{NA}	{NA}	{NA}
WP_023339389.1	{WP_023339389.1; MULTISPECIES: site-specific DNA-methyltransferase [Klebsiella]}	{kom:HR38_29970; K00571 E2.1.1.72 site-specific DNA-methyltransferase (adenine-specific) 2.1.1.72 }	{NP_309807; COG2189 Adenine specific DNA methylase Mod L Replication, recombination and repair ;}	{GO:0008152; NA GO:0008170; N-methyltransferase activity; molecular_function GO:0006306; DNA methylation; biological_process GO:0008168; methyltransferase activity; molecular_function GO:0003677; DNA binding; molecular_function}	{NA}	{NA}
WP_023339391.1	{WP_023339391.1; hypothetical protein MS6671_phi0370 (plasmid) [Klebsiella pneumoniae|Klebsiella pneumoniae,|Klebsiella quasipneumoniae]}	{koc:AB185_00790; }	{NA}	{GO:0017119; Golgi transport complex; cellular_component}	{NA}	{NA}
WP_023339392.1	{WP_023339392.1; hypothetical protein MS6671_phi0380 (plasmid) [Klebsiella pneumoniae|Klebsiella pneumoniae,|Klebsiella quasipneumoniae]}	{koc:AB185_00795; }	{YP_006281460; COG4679 Phage-related protein X Mobilome: prophages, transposons;}	{NA}	{NA}	{NA}
WP_023339393.1	{WP_023339393.1; DNA-binding transcriptional repressor PuuR (plasmid) [Klebsiella pneumoniae]}	{koc:AB185_00800; }	{NP_931538; COG1396 Transcriptional regulator, contains XRE-family HTH domain K Transcription ;}	{GO:0016987; sigma factor activity; molecular_function GO:0006352; transcription initiation, DNA-dependent; biological_process GO:0043565; sequence-specific DNA binding; molecular_function GO:0003700; sequence-specific DNA binding transcription factor activity; molecular_function GO:0005622; intracellular; cellular_component GO:0006355; regulation of transcription, DNA-dependent; biological_proce…	{NA}	{NA}
WP_023339394.1	{ESN30366.1; hypothetical protein MS6671_phi0400 (plasmid) [Klebsiella pneumoniae|Klebsiella pneumoniae,]}	{koc:AB185_00805; }	{NA}	{NA}	{NA}	{NA}
WP_023339395.1	{WP_023339395.1; hypothetical protein MS6671_phi0410 (plasmid) [Klebsiella pneumoniae|Klebsiella pneumoniae,|Klebsiella quasipneumoniae]}	{koc:AB185_00810; }	{NA}	{NA}	{NA}	{NA}
WP_023339397.1	{WP_023339397.1; hypothetical protein MS6671_phi0430 (plasmid) [Klebsiella pneumoniae|Klebsiella pneumoniae,|Klebsiella quasipneumoniae]}	{koc:AB185_00820; }	{NA}	{NA}	{NA}	{NA}
WP_024144810.1	{WP_024144810.1; MULTISPECIES: CopG family transcriptional regulator [Enterobacter cloacae|Enterobacteriaceae|Escherichia coli]}	{kvd:KR75_26570; K07746 parD1_3_4 antitoxin ParD1/3/4 -- }	{NP_461876; COG3609 Transcriptional regulator, contains Arc/MetJ-type RHH (ribbon-helix-helix) DNA-binding domain K Transcription ;}	{GO:0006355; regulation of transcription, DNA-dependent; biological_process}	{NA}	{NA}
WP_032408957.1	{WP_032408957.1; Phage terminase, small subunit [Klebsiella pneumoniae]}	{koc:AB185_00730; }	{YP_002239190; COG3747 Phage terminase, small subunit X Mobilome: prophages, transposons;}	{NA}	{NA}	{NA}
WP_032408961.1	{WP_032408961.1; nucleoside 2-deoxyribosyltransferase family protein (plasmid) [Klebsiella oxytoca|Klebsiella pneumoniae]}	{koc:AB185_00760; }	{YP_001254203; COG3613 Nucleoside 2-deoxyribosyltransferase F Nucleotide transport and metabolism ;}	{GO:0070694; deoxyribonucleoside 5'-monophosphate N-glycosidase activity; molecular_function GO:0009159; deoxyribonucleoside monophosphate catabolic process; biological_process GO:0050144; nucleoside deoxyribosyltransferase activity; molecular_function}	{NA}	{NA}
WP_032408967.1	{ESN30362.1; hypothetical protein MS6671_phi0360 (plasmid) [Klebsiella pneumoniae|Klebsiella pneumoniae,]}	{koc:AB185_00785; }	{NA}	{NA}	{NA}	{NA}
WP_032408968.1	{WP_032408968.1; hypothetical protein MS6671_phi0420 (plasmid) [Klebsiella pneumoniae|Klebsiella pneumoniae,]}	{koc:AB185_00815; }	{NA}	{NA}	{NA}	{NA}
WP_032408971.1	{WP_032408971.1; MULTISPECIES: phage antitermination Q family protein [Klebsiella]}	{koc:AB185_00845; }	{NA}	{GO:0005198; NA GO:0019028; viral capsid; cellular_component}	{NA}	{NA}
WP_032408972.1	{WP_032408972.1; hypothetical protein KPNIH31_26235 (plasmid) [Klebsiella pneumoniae|Klebsiella pneumoniae,|Klebsiella quasipneumoniae]}	{koc:AB185_00850; K22302 dicC transcriptional repressor of cell division inhibition gene dicB -- }	{NA}	{GO:0003677; DNA binding; molecular_function GO:0006355; regulation of transcription, DNA-dependent; biological_process}	{NA}	{NA}
WP_032408995.1	{AIX87169.1; hypothetical protein KPNIH31_26120 (plasmid) [Klebsiella pneumoniae subsp. pneumoniae]}	{koc:AB185_00735; }	{NA}	{GO:0003677; DNA binding; molecular_function GO:0006351; transcription, DNA-dependent; biological_process GO:0003676; nucleic acid binding; molecular_function GO:0008270; zinc ion binding; molecular_function GO:0035556; intracellular signal transduction; biological_process GO:0003899; DNA-directed RNA polymerase activity; molecular_function}	{NA}	{NA}
WP_032409244.1	{WP_032409244.1; MULTISPECIES: phage exclusion protein Lit [Klebsiella]}	{kvd:KR75_27050; }	{NA}	{NA}	{NA}	{NA}
WP_032411117.1	{WP_032411117.1; MULTISPECIES: hypothetical protein [Klebsiella|Klebsiella oxytoca,|Klebsiella pneumoniae|Klebsiella sp.|Klebsiella variicola,|[Enterobacter] aerogenes,]}	{kvd:KR75_16380; }	{NA}	{NA}	{NA}	{NA}
WP_032413539.1	{WP_047722518.1; hypothetical protein AB185_00840 (plasmid) [Klebsiella oxytoca|Klebsiella pneumoniae|Klebsiella pneumoniae,|Klebsiella quasipneumoniae]}	{koc:AB185_00840; }	{NA}	{NA}	{NA}	{NA}
WP_032413541.1	{WP_032413541.1; MULTISPECIES: DNA-binding protein [Klebsiella|Klebsiella pneumoniae]}	{kvd:KR75_27360; }	{NA}	{GO:0003677; DNA binding; molecular_function GO:0043565; sequence-specific DNA binding; molecular_function GO:0045892; negative regulation of transcription, DNA-dependent; biological_process}	{NA}	{NA}
WP_032413547.1	{WP_032413547.1; secondary immunity repressor (plasmid) [Klebsiella oxytoca|Klebsiella pneumoniae|Klebsiella variicola|[Enterobacter] aerogenes]}	{koc:AB185_00880; }	{NA}	{NA}	{NA}	{NA}
WP_032420719.1	{WP_032420719.1; MULTISPECIES: phage tail assembly protein T [Enterobacteriaceae|Klebsiella pneumoniae|Klebsiella variicola]}	{kvd:KR75_25570; }	{NA}	{NA}	{NA}	{NA}
WP_032431321.1	{WP_032431321.1; conjugal transfer protein TraY [Klebsiella pneumoniae]}	{kpm:KPHS_p201040; }	{NA}	{GO:0000746; conjugation; biological_process GO:0003677; DNA binding; molecular_function}	{NA}	{NA}
WP_032437708.1	{WP_032437708.1; MULTISPECIES: hypothetical protein [Klebsiella|Klebsiella pneumoniae|Klebsiella pneumoniae,|Klebsiella variicola,]}	{kvd:KR75_25740; }	{NA}	{GO:0006396; RNA processing; biological_process GO:0003774; motor activity; molecular_function GO:0000176; nuclear exosome (RNase complex); cellular_component GO:0005524; ATP binding; molecular_function GO:0004435; phosphatidylinositol phospholipase C activity; molecular_function GO:0005509; calcium ion binding; molecular_function GO:0016459; myosin complex; cellular_component GO:0006629; lipid m…	{NA}	{NA}
WP_032691349.1	{EOQ54600.1; Leucine-responsive regulatory protein [Klebsiella pneumoniae]}	{kvd:KR75_16945; }	{NP_459976; COG1522 DNA-binding transcriptional regulator, Lrp family K Transcription ;}	{GO:0006355; regulation of transcription, DNA-dependent; biological_process GO:0003677; DNA binding; molecular_function GO:0005622; intracellular; cellular_component GO:0003700; sequence-specific DNA binding transcription factor activity; molecular_function GO:0043565; sequence-specific DNA binding; molecular_function GO:0006352; transcription initiation, DNA-dependent; biological_process GO:0006…	{NA}	{NA}
WP_032726145.1	{WP_032726145.1; MULTISPECIES: hypothetical protein [Enterobacterales|Escherichia coli,|Klebsiella pneumoniae,|Klebsiella variicola,|Proteus sp.]}	{kvd:KR75_25640; }	{NA}	{NA}	{NA}	{NA}
WP_032735223.1	{WP_032735223.1; MULTISPECIES: transporter [Klebsiella|Klebsiella variicola]}	{kvd:KR75_23700; }	{YP_002932469; COG3585 Molybdopterin-binding protein H Coenzyme transport and metabolism ;}	{GO:0016820; hydrolase activity, acting on acid anhydrides, catalyzing transmembrane movement of substances; molecular_function GO:0055085; transmembrane transport; biological_process GO:0043190; ATP-binding cassette (ABC) transporter complex; cellular_component GO:0016020; membrane; cellular_component GO:0006810; transport; biological_process GO:0005215; NA GO:0005524; ATP binding; molecular_fun…	{NA}	{NA}
WP_032735224.1	{WP_032735224.1; MULTISPECIES: hypothetical protein [Klebsiella|Klebsiella pneumoniae|Klebsiella variicola,]}	{kvd:KR75_23705; }	{NA}	{NA}	{NA}	{NA}
WP_032735911.1	{WP_032735911.1; MULTISPECIES: hypothetical protein [Klebsiella|Klebsiella variicola,]}	{kvd:KR75_23865; }	{NA}	{GO:0016021; integral to membrane; cellular_component GO:0005783; endoplasmic reticulum; cellular_component GO:0006886; intracellular protein transport; biological_process}	{NA}	{NA}
WP_032740681.1	{WP_032740681.1; hypothetical protein KR75_26625 (plasmid) [Klebsiella pneumoniae|Klebsiella variicola]}	{kvd:KR75_26625; }	{NA}	{NA}	{NA}	{NA}
WP_032987777.1	{WP_032987777.1; MULTISPECIES: hypothetical protein [Cronobacter sakazakii,|Enterobacteriaceae|Klebsiella variicola,]}	{kvd:KR75_02295; }	{NA}	{NA}	{NA}	{NA}
WP_038875596.1	{WP_038875596.1; MULTISPECIES: DUF4868 domain-containing protein [Enterobacterales|Klebsiella variicola]}	{kvd:KR75_02305; }	{NA}	{NA}	{NA}	{NA}
WP_039102434.1	{WP_039102434.1; hypothetical protein [Klebsiella variicola|Klebsiella variicola,]}	{kvd:KR75_02290; }	{NA}	{NA}	{NA}	{NA}
WP_039102435.1	{WP_039102435.1; hypothetical protein [Klebsiella variicola|Klebsiella variicola,]}	{kvd:KR75_02300; }	{NA}	{NA}	{NA}	{NA}
WP_039102451.1	{WP_039102451.1; hypothetical protein [Klebsiella variicola|Klebsiella variicola,]}	{kvd:KR75_02420; }	{NA}	{NA}	{NA}	{NA}
WP_039102452.1	{WP_039102452.1; hypothetical protein [Klebsiella variicola|Klebsiella variicola,]}	{kvd:KR75_02440; }	{NA}	{NA}	{NA}	{NA}
WP_039102763.1	{WP_039102763.1; NIPSNAP family containing protein [Klebsiella variicola]}	{kvd:KR75_10945; }	{NA}	{NA}	{NA}	{NA}
WP_039102764.1	{WP_039102764.1; hypothetical protein [Klebsiella variicola|Klebsiella variicola,]}	{kvd:KR75_10950; }	{NA}	{NA}	{NA}	{NA}
WP_039102765.1	{WP_039102765.1; hypothetical protein [Klebsiella variicola|Klebsiella variicola,]}	{kvd:KR75_10955; }	{NA}	{GO:0006355; regulation of transcription, DNA-dependent; biological_process}	{NA}	{NA}
WP_039102766.1	{WP_039102766.1; MULTISPECIES: hypothetical protein [Enterobacteriaceae|Klebsiella variicola,]}	{kvd:KR75_10960; }	{NA}	{NA}	{NA}	{NA}
WP_039102768.1	{WP_039102768.1; hypothetical protein [Klebsiella variicola|Klebsiella variicola,]}	{kvd:KR75_10975; }	{NA}	{NA}	{NA}	{NA}
WP_039102769.1	{WP_039102769.1; hypothetical protein [Klebsiella variicola|Klebsiella variicola,]}	{kvd:KR75_10980; }	{NA}	{GO:0034755; iron ion transmembrane transport; biological_process GO:0016021; integral to membrane; cellular_component GO:0005381; iron ion transmembrane transporter activity; molecular_function}	{NA}	{NA}
WP_039102770.1	{WP_039102770.1; hypothetical protein [Klebsiella variicola|Klebsiella variicola,]}	{kvd:KR75_10990; }	{NA}	{GO:0016887; ATPase activity; molecular_function GO:0005524; ATP binding; molecular_function}	{NA}	{NA}
WP_039102771.1	{WP_039102771.1; MULTISPECIES: hypothetical protein [Klebsiella|Klebsiella variicola,]}	{kvd:KR75_11000; }	{NA}	{NA}	{NA}	{NA}
WP_039102774.1	{WP_039102774.1; conserved exported hypothetical protein [Klebsiella pneumoniae,|Klebsiella quasipneumoniae|Klebsiella variicola,]}	{kvd:KR75_11030; K07733 alpA prophage regulatory protein -- }	{YP_007877128; COG3311 Predicted DNA-binding transcriptional regulator AlpA KX Transcription ; Mobilome: prophages, transposons;}	{GO:0043565; sequence-specific DNA binding; molecular_function}	{NA}	{NA}
WP_039102996.1	{WP_039102996.1; integrase [Klebsiella variicola]}	{kvd:KR75_16355; }	{YP_003613355; COG0582 Integrase LX Replication, recombination and repair ; Mobilome: prophages, transposons;}	{GO:0015074; DNA integration; biological_process GO:0016706; oxidoreductase activity, acting on paired donors, with incorporation or reduction of molecular oxygen, 2-oxoglutarate as one donor, and incorporation of one atom each of oxygen into both donors; molecular_function GO:0003677; DNA binding; molecular_function GO:0006310; DNA recombination; biological_process GO:0055114; oxidation-reductio…	{NA}	{NA}
WP_039102997.1	{WP_039102997.1; hypothetical protein [Klebsiella variicola|Klebsiella variicola,]}	{kvd:KR75_16360; }	{NA}	{NA}	{NA}	{NA}
WP_039102998.1	{WP_039102998.1; phage repressor protein [Klebsiella variicola]}	{kvd:KR75_16370; }	{YP_003881630; COG2932 Phage repressor protein C, contains Cro/C1-type HTH and peptisase s24 domains X Mobilome: prophages, transposons;}	{GO:0003677; DNA binding; molecular_function GO:0045892; negative regulation of transcription, DNA-dependent; biological_process}	{NA}	{NA}
WP_039102999.1	{WP_039102999.1; hypothetical protein [Klebsiella variicola|Klebsiella variicola,]}	{kvd:KR75_16375; }	{NA}	{NA}	{NA}	{NA}
WP_039103000.1	{WP_039103000.1; hypothetical protein [Klebsiella variicola|Klebsiella variicola,]}	{kvd:KR75_16390; }	{NA}	{NA}	{NA}	{NA}
WP_039103001.1	{WP_039103001.1; adenine methylase [Klebsiella variicola]}	{kvd:KR75_16395; K06223 dam DNA adenine methylase 2.1.1.72 Genetic Information Processing; Replication and repair; Mismatch repair [PATH:ko03430] }	{YP_003613347; COG0338 Site-specific DNA-adenine methylase L Replication, recombination and repair ;}	{GO:0031167; rRNA methylation; biological_process GO:0032775; DNA methylation on adenine; biological_process GO:0008168; methyltransferase activity; molecular_function GO:0009007; site-specific DNA-methyltransferase (adenine-specific) activity; molecular_function}	{NA}	{NA}
WP_039103002.1	{WP_039103002.1; transcriptional regulator [Klebsiella variicola]}	{kvd:KR75_16405; }	{NA}	{GO:0006265; DNA topological change; biological_process GO:0001882; nucleoside binding; molecular_function GO:0003887; DNA-directed DNA polymerase activity; molecular_function GO:0005694; chromosome; cellular_component GO:0003911; DNA ligase (NAD+) activity; molecular_function GO:0006281; DNA repair; biological_process GO:0003677; DNA binding; molecular_function GO:0003916; DNA topoisomerase acti…	{NA}	{NA}
WP_039103003.1	{WP_039103003.1; phage portal protein [Klebsiella variicola]}	{kvd:KR75_16410; }	{YP_003613342; COG4695 Phage portal protein BeeE X Mobilome: prophages, transposons;}	{NA}	{NA}	{NA}
WP_039103004.1	{WP_039103004.1; terminase [Klebsiella variicola]}	{kvd:KR75_16415; }	{YP_003613341; COG4373 Mu-like prophage FluMu protein gp28 X Mobilome: prophages, transposons;}	{GO:0019069; viral capsid assembly; biological_process GO:0005524; ATP binding; molecular_function}	{NA}	{NA}
WP_039103005.1	{WP_039103005.1; phage capsid scaffolding protein [Klebsiella variicola]}	{kvd:KR75_16420; }	{NA}	{GO:0019028; viral capsid; cellular_component GO:0005515; protein binding; molecular_function GO:0019031; viral envelope; cellular_component GO:0019069; viral capsid assembly; biological_process GO:0005198; NA}	{NA}	{NA}
WP_039103006.1	{WP_039103006.1; phage major capsid protein, P2 family [Klebsiella variicola]}	{kvd:KR75_16425; }	{NA}	{GO:0019028; viral capsid; cellular_component}	{NA}	{NA}
WP_039103007.1	{WP_039103007.1; terminase [Klebsiella variicola]}	{kvd:KR75_16430; }	{NA}	{GO:0003677; DNA binding; molecular_function GO:0019069; viral capsid assembly; biological_process GO:0004519; endonuclease activity; molecular_function}	{NA}	{NA}
WP_039103008.1	{WP_039103008.1; head completion protein [Klebsiella variicola]}	{kvd:KR75_16435; }	{NA}	{GO:0019069; viral capsid assembly; biological_process}	{NA}	{NA}
WP_039103009.1	{WP_039103009.1; phage tail protein [Klebsiella variicola]}	{kvd:KR75_16440; }	{NA}	{NA}	{NA}	{NA}
WP_039103010.1	{WP_039103010.1; hypothetical protein [Klebsiella variicola|Klebsiella variicola,]}	{kvd:KR75_16445; }	{NA}	{NA}	{NA}	{NA}
WP_039103011.1	{WP_039103011.1; phage tail protein [Klebsiella variicola]}	{kvd:KR75_16450; }	{NA}	{GO:0016032; NA}	{NA}	{NA}
WP_039103012.1	{WP_039103012.1; phage tail protein [Klebsiella variicola]}	{kvd:KR75_16455; }	{NA}	{NA}	{NA}	{NA}
WP_039103013.1	{WP_039103013.1; holin [Klebsiella variicola]}	{kvd:KR75_16460; }	{NA}	{NA}	{NA}	{NA}
WP_039103014.1	{WP_039103014.1; hypothetical protein [Klebsiella variicola, KR75_16465]}	{kvd:KR75_16465; }	{NA}	{NA}	{NA}	{NA}
WP_039103015.1	{WP_039103015.1; hypothetical protein [Klebsiella variicola|Klebsiella variicola,]}	{kvd:KR75_16470; }	{NA}	{NA}	{NA}	{NA}
WP_039103017.1	{WP_039103017.1; hypothetical protein [Klebsiella variicola|Klebsiella variicola,]}	{kvd:KR75_16480; }	{NA}	{NA}	{NA}	{NA}
WP_039103018.1	{WP_039103018.1; phage tail tape measure protein [Klebsiella variicola]}	{kvd:KR75_16485; }	{YP_003881654; COG5283 Phage-related tail protein X Mobilome: prophages, transposons;}	{NA}	{NA}	{NA}
WP_039103019.1	{WP_039103019.1; hypothetical protein [Klebsiella variicola, KR75_16490]}	{kvd:KR75_16490; }	{NA}	{NA}	{NA}	{NA}
WP_039103020.1	{WP_039103020.1; hypothetical protein [Klebsiella variicola, KR75_16495]}	{kvd:KR75_16495; }	{YP_003613326; COG3299 Uncharacterized phage protein gp47/JayE X Mobilome: prophages, transposons;}	{NA}	{NA}	{NA}
WP_039103021.1	{WP_039103021.1; hypothetical protein [Klebsiella variicola|Klebsiella variicola,]}	{kvd:KR75_16500; }	{NA}	{NA}	{NA}	{NA}
WP_039103022.1	{WP_039103022.1; hypothetical protein [Klebsiella variicola|Klebsiella variicola,]}	{kvd:KR75_16510; }	{NA}	{NA}	{NA}	{NA}
WP_039103024.1	{WP_039103024.1; hypothetical protein [Klebsiella variicola|Klebsiella variicola,]}	{kvd:KR75_16515; }	{NA}	{NA}	{NA}	{NA}
WP_039103025.1	{WP_039103025.1; hypothetical protein [Klebsiella variicola|Klebsiella variicola,]}	{kvd:KR75_16520; }	{NA}	{NA}	{NA}	{NA}
WP_039103026.1	{WP_039103026.1; hypothetical protein [Klebsiella variicola|Klebsiella variicola,]}	{kvd:KR75_16525; }	{YP_003613318; COG3501 Uncharacterized conserved protein, implicated in type VI secretion and phage assembly UXR Intracellular trafficking, secretion, and vesicular transport ; Mobilome: prophages, transposons; General function prediction only ;}	{NA}	{NA}	{NA}
WP_039103027.1	{WP_039103027.1; hypothetical protein [Klebsiella variicola|Klebsiella variicola,]}	{kvd:KR75_16530; }	{NA}	{NA}	{NA}	{NA}
WP_039103040.1	{WP_039103040.1; septum formation initiator [Klebsiella variicola]}	{kvd:KR75_16955; K03837 sdaC serine transporter -- }	{YP_003211717; COG0814 Amino acid permease E Amino acid transport and metabolism ;}	{GO:0003333; amino acid transmembrane transport; biological_process}	{NA}	{NA}
WP_039103041.1	{WP_039103041.1; Zn-dependent hydrolase [Klebsiella variicola]}	{kvd:KR75_16960; K06016 pydC beta-ureidopropionase / N-carbamoyl-L-amino-acid hydrolase 3.5.1.6 3.5.1.87 Metabolism; Nucleotide metabolism; Pyrimidine metabolism [PATH:ko00240] }	{YP_548344; COG0624 Acetylornithine deacetylase/Succinyl-diaminopimelate desuccinylase or related deacylase E Amino acid transport and metabolism ;}	{GO:0016787; hydrolase activity; molecular_function GO:0008233; peptidase activity; molecular_function GO:0006508; proteolysis; biological_process GO:0008152; NA}	{NA}	{NA}
WP_039103074.1	{WP_039103074.1; hypothetical protein [Klebsiella variicola|Klebsiella variicola,]}	{kvd:KR75_17925; }	{NA}	{NA}	{NA}	{NA}
WP_039103085.1	{WP_039103085.1; MULTISPECIES: GntR family transcriptional regulator [Klebsiella|Klebsiella variicola]}	{kvd:KR75_18100; }	{NA}	{GO:0005622; intracellular; cellular_component GO:0006355; regulation of transcription, DNA-dependent; biological_process GO:0003700; sequence-specific DNA binding transcription factor activity; molecular_function}	{NA}	{NA}
WP_039103148.1	{WP_039103148.1; response regulator [Klebsiella variicola]}	{kvd:KR75_18895; }	{YP_001506522; COG0784 CheY chemotaxis protein or a CheY-like REC (receiver) domain T Signal transduction mechanisms ;}	{GO:0000156; two-component response regulator activity; molecular_function GO:0006813; potassium ion transport; biological_process GO:0016831; carboxy-lyase activity; molecular_function GO:0006355; regulation of transcription, DNA-dependent; biological_process GO:0000160; two-component signal transduction system (phosphorelay); biological_process}	{NA}	{NA}
WP_039103200.1	{WP_039103200.1; hypothetical protein [Klebsiella variicola, KR75_19360]}	{kvd:KR75_19360; }	{NA}	{NA}	{NA}	{NA}
WP_039103343.1	{WP_039103343.1; hypothetical protein [Klebsiella variicola|Klebsiella variicola,]}	{kvd:KR75_20360; }	{YP_003674072; COG3540 Phosphodiesterase/alkaline phosphatase D P Inorganic ion transport and metabolism ;}	{NA}	{NA}	{NA}
WP_039103433.1	{WP_039103433.1; AAA family ATPase [Klebsiella variicola]}	{kvd:KR75_21095; }	{NA}	{GO:0005524; ATP binding; molecular_function}	{NA}	{NA}
WP_039103434.1	{WP_039103434.1; CHAT domain-containing protein [Klebsiella variicola]}	{kvd:KR75_21105; }	{NA}	{NA}	{NA}	{NA}
WP_039103436.1	{WP_039103436.1; ATP-dependent OLD family endonuclease [Klebsiella variicola]}	{kvd:KR75_21110; }	{YP_003615374; COG3593 Predicted ATP-dependent endonuclease of the OLD family, contains P-loop ATPase and TOPRIM domains L Replication, recombination and repair ;}	{GO:0016887; ATPase activity; molecular_function GO:0003924; GTPase activity; molecular_function GO:0015031; protein transport; biological_process GO:0005524; ATP binding; molecular_function GO:0016021; integral to membrane; cellular_component GO:0006184; GTP catabolic process; biological_process GO:0005525; GTP binding; molecular_function GO:0008053; mitochondrial fusion; biological_process GO:0…	{NA}	{NA}
WP_039103438.1	{WP_039103438.1; hypothetical protein [Klebsiella variicola|Klebsiella variicola,]}	{kvd:KR75_21115; }	{YP_004119484; COG0583 DNA-binding transcriptional regulator, LysR family K Transcription ;}	{GO:0003700; sequence-specific DNA binding transcription factor activity; molecular_function GO:0006355; regulation of transcription, DNA-dependent; biological_process GO:0005622; intracellular; cellular_component}	{NA}	{NA}
WP_039103440.1	{WP_039103440.1; maltose acetyltransferase [Klebsiella variicola]}	{kvd:KR75_21120; }	{YP_004119485; COG0110 Acetyltransferase (isoleucine patch superfamily) R General function prediction only ;}	{NA}	{VFG005951; CVF186 Capsule eps9 exopolysaccharide biosynthesis protein GBS can be suclassified into serotypes according to the immunologic type of the polysaccharide capsule. Of the nine serotypes described so far, the type Ia, Ib, II, III and V are reponsible for the majority of invasive human GBS disease; serotype III is particularly important becasue it causes the majority of infection to neon…	{NA}
WP_039103443.1	{WP_039103443.1; short-chain dehydrogenase [Klebsiella variicola]}	{kvd:KR75_21125; }	{YP_004119488; COG1028 NAD(P)-dependent dehydrogenase, short-chain alcohol dehydrogenase family IQR Lipid transport and metabolism ; Secondary metabolites biosynthesis, transport and catabolism ; General function prediction only ;}	{GO:0016491; oxidoreductase activity; molecular_function GO:0055114; oxidation-reduction process; biological_process GO:0008152; NA GO:0006631; fatty acid metabolic process; biological_process GO:0003857; 3-hydroxyacyl-CoA dehydrogenase activity; molecular_function GO:0006813; potassium ion transport; biological_process}	{NA}	{NA}
WP_039103447.1	{WP_039103447.1; NAD-dependent dehydratase [Klebsiella variicola]}	{kvd:KR75_21135; }	{YP_007873831; COG0702 Uncharacterized conserved protein YbjT, contains NAD(P)-binding and DUF2867 domains R General function prediction only ;}	{GO:0008839; dihydrodipicolinate reductase activity; molecular_function GO:0016616; oxidoreductase activity, acting on the CH-OH group of donors, NAD or NADP as acceptor; molecular_function GO:0044237; cellular metabolic process; biological_process GO:0006694; steroid biosynthetic process; biological_process GO:0055114; oxidation-reduction process; biological_process GO:0016491; oxidoreductase ac…	{NA}	{NA}
WP_039103456.1	{WP_047626671.1; multiple stress resistance protein BhsA [Enterobacter sp. ZOR0014]}	{ddc:Dd586_2860; }	{NA}	{NA}	{NA}	{NA}
WP_039103462.1	{WP_039103462.1; 2, 5-diketo-D-gluconic acid reductase [Klebsiella variicola]}	{kvd:KR75_21175; K06221 dkgA 2,5-diketo-D-gluconate reductase A 1.1.1.346 }	{YP_004211728; COG0656 Aldo/keto reductase, related to diketogulonate reductase Q Secondary metabolites biosynthesis, transport and catabolism ;}	{GO:0006260; DNA replication; biological_process}	{NA}	{NA}
WP_039103464.1	{WP_039103464.1; alpha/beta hydrolase [Klebsiella variicola]}	{kvd:KR75_21180; }	{YP_007873811; COG1073 Fermentation-respiration switch protein FrsA, has esterase activity, DUF1100 family T Signal transduction mechanisms ;}	{GO:0006260; DNA replication; biological_process GO:0055114; oxidation-reduction process; biological_process GO:0004748; ribonucleoside-diphosphate reductase activity; molecular_function GO:0005971; ribonucleoside-diphosphate reductase complex; cellular_component}	{NA}	{NA}
WP_039103466.1	{WP_039103466.1; flavodoxin [Klebsiella variicola]}	{kvd:KR75_21190; }	{YP_004929445; COG0716 Flavodoxin C Energy production and conversion ;}	{GO:0016491; oxidoreductase activity; molecular_function GO:0016787; hydrolase activity; molecular_function}	{NA}	{NA}
WP_039103468.1	{WP_039103468.1; cupin [Klebsiella variicola]}	{kvd:KR75_21200; }	{YP_007873809; COG1917 Cupin domain protein related to quercetin dioxygenase R General function prediction only ;}	{GO:0010309; acireductone dioxygenase [iron(II)-requiring] activity; molecular_function GO:0045735; NA GO:0055114; oxidation-reduction process; biological_process}	{NA}	{NA}
WP_039103472.1	{WP_039103472.1; flavodoxin [Klebsiella variicola]}	{kvd:KR75_21210; }	{YP_007873807; COG0716 Flavodoxin C Energy production and conversion ;}	{GO:0016491; oxidoreductase activity; molecular_function}	{NA}	{NA}
WP_039103474.1	{WP_039103474.1; two-component sensor histidine kinase [Klebsiella variicola]}	{kvd:KR75_21215; K07644 cusS, copS, silS two-component system, OmpR family, heavy metal sensor histidine kinase CusS 2.7.13.3 Environmental Information Processing; Signal transduction; Two-component system [PATH:ko02020] }	{YP_007873806; COG2205 K+-sensing histidine kinase KdpD T Signal transduction mechanisms ;}	{GO:0004871; signal transducer activity; molecular_function GO:0016020; membrane; cellular_component GO:0000155; two-component sensor activity; molecular_function GO:0016021; integral to membrane; cellular_component GO:0007165; signal transduction; biological_process GO:0005524; ATP binding; molecular_function}	{NA}	{NA}
WP_039103478.1	{WP_039103478.1; alpha/beta hydrolase [Klebsiella variicola]}	{kvd:KR75_21225; K06889 K06889 uncharacterized protein -- }	{YP_004119031; COG1073 Fermentation-respiration switch protein FrsA, has esterase activity, DUF1100 family T Signal transduction mechanisms ;}	{GO:0008236; serine-type peptidase activity; molecular_function GO:0016042; lipid catabolic process; biological_process GO:0016787; hydrolase activity; molecular_function GO:0006508; proteolysis; biological_process GO:0004177; aminopeptidase activity; molecular_function GO:0003847; 1-alkyl-2-acetylglycerophosphocholine esterase activity; molecular_function}	{NA}	{NA}
WP_039103482.1	{WP_039103482.1; NAD-dependent dehydratase [Klebsiella variicola]}	{kvd:KR75_21235; }	{YP_004119482; COG0702 Uncharacterized conserved protein YbjT, contains NAD(P)-binding and DUF2867 domains R General function prediction only ;}	{GO:0006694; steroid biosynthetic process; biological_process GO:0044237; cellular metabolic process; biological_process GO:0016616; oxidoreductase activity, acting on the CH-OH group of donors, NAD or NADP as acceptor; molecular_function GO:0003854; 3-beta-hydroxy-delta5-steroid dehydrogenase activity; molecular_function GO:0055114; oxidation-reduction process; biological_process GO:0016491; oxi…	{NA}	{NA}
WP_039103571.1	{WP_039103571.1; alpha/beta hydrolase [Klebsiella variicola]}	{kvd:KR75_21705; }	{YP_003612635; COG3208 Surfactin synthase thioesterase subunit Q Secondary metabolites biosynthesis, transport and catabolism ;}	{GO:0016788; hydrolase activity, acting on ester bonds; molecular_function GO:0006505; GPI anchor metabolic process; biological_process GO:0008152; NA GO:0016787; hydrolase activity; molecular_function GO:0006886; intracellular protein transport; biological_process GO:0009058; biosynthetic process; biological_process}	{NA}	{NA}
WP_039103747.1	{WP_039103747.1; hypothetical protein [Klebsiella variicola|Klebsiella variicola,]}	{kvd:KR75_23200; }	{NA}	{GO:0006810; transport; biological_process GO:0098519; NA GO:0005524; ATP binding; molecular_function GO:0070526; threonylcarbamoyladenosine biosynthetic process; biological_process GO:0016887; ATPase activity; molecular_function GO:0006576; cellular biogenic amine metabolic process; biological_process GO:0006304; DNA modification; biological_process GO:0016301; kinase activity; molecular_functio…	{NA}	{NA}
WP_039103823.1	{WP_039103823.1; ABC transporter substrate-binding protein [Klebsiella variicola]}	{kvd:KR75_23710; K15495 wtpA molybdate/tungstate transport system substrate-binding protein -- Environmental Information Processing; Membrane transport; ABC transporters [PATH:ko02010] }	{YP_004117944; COG0725 ABC-type molybdate transport system, periplasmic component P Inorganic ion transport and metabolism ;}	{GO:0005215; NA GO:0006810; transport; biological_process}	{NA}	{NA}
WP_039103824.1	{WP_039103824.1; sulfate ABC transporter permease [Klebsiella variicola]}	{kvd:KR75_23715; K15496 wtpB molybdate/tungstate transport system permease protein -- Environmental Information Processing; Membrane transport; ABC transporters [PATH:ko02010] }	{YP_004117943; COG4149 ABC-type molybdate transport system, permease component P Inorganic ion transport and metabolism ;}	{GO:0016020; membrane; cellular_component GO:0005215; NA GO:0006810; transport; biological_process}	{NA}	{NA}
WP_039103842.1	{WP_039103842.1; hypothetical protein [Klebsiella variicola|Klebsiella variicola,]}	{kvd:KR75_23790; }	{YP_001453419; COG5492 Uncharacterized conserved protein YjdB, contains Ig-like domain R General function prediction only ;}	{NA}	{NA}	{NA}
WP_039103863.1	{WP_039103863.1; hypothetical protein [Klebsiella variicola|Klebsiella variicola,]}	{kvd:KR75_23905; }	{NA}	{NA}	{NA}	{NA}
WP_039103864.1	{AJA97787.1; hypothetical protein [Klebsiella variicola, KR75_23910]}	{kvd:KR75_23910; }	{NA}	{NA}	{NA}	{NA}
WP_039103874.1	{WP_039103874.1; hypothetical protein [Klebsiella variicola|Klebsiella variicola,]}	{kvd:KR75_23945; }	{NA}	{NA}	{NA}	{NA}
WP_039103876.1	{WP_039103876.1; hypothetical protein [Klebsiella variicola|Klebsiella variicola,]}	{kvd:KR75_23950; }	{NA}	{NA}	{NA}	{NA}
WP_039103878.1	{WP_039103878.1; hypothetical protein [Klebsiella variicola|Klebsiella variicola,]}	{kvd:KR75_23955; }	{NA}	{NA}	{NA}	{NA}
WP_039103879.1	{WP_039103879.1; methyltransferase [Klebsiella variicola]}	{kvd:KR75_23960; }	{YP_003612175; COG2226 Ubiquinone/menaquinone biosynthesis C-methylase UbiE H Coenzyme transport and metabolism ;}	{GO:0008152; NA GO:0008168; methyltransferase activity; molecular_function}	{NA}	{NA}
WP_039103890.1	{WP_039103890.1; hypothetical protein [Klebsiella variicola|Klebsiella variicola,]}	{kvd:KR75_24005; }	{NA}	{NA}	{NA}	{NA}
WP_039103891.1	{WP_039103891.1; hypothetical protein [Klebsiella variicola|Klebsiella variicola,]}	{kvd:KR75_24010; }	{NA}	{GO:0016020; membrane; cellular_component GO:0008360; regulation of cell shape; biological_process}	{NA}	{NA}
WP_039104013.1	{WP_039104013.1; DNA-invertase [Klebsiella variicola]}	{kvd:KR75_25525; }	{YP_002238667; COG1961 Site-specific DNA recombinase related to the DNA invertase Pin L Replication, recombination and repair ;}	{GO:0006310; DNA recombination; biological_process GO:0000150; recombinase activity; molecular_function GO:0003677; DNA binding; molecular_function GO:0043565; sequence-specific DNA binding; molecular_function}	{NA}	{NA}
WP_039104015.1	{WP_039104015.1; hypothetical protein [Klebsiella variicola|Klebsiella variicola,]}	{kvd:KR75_25535; }	{NA}	{NA}	{NA}	{NA}
WP_039104017.1	{WP_039104017.1; hypothetical protein [Klebsiella variicola|Klebsiella variicola,]}	{kvd:KR75_25540; }	{NA}	{NA}	{NA}	{NA}
WP_039104025.1	{WP_039104025.1; phage tail tape measure protein [Klebsiella variicola]}	{kvd:KR75_25565; }	{NP_309670; COG1196 Chromosome segregation ATPase D Cell cycle control, cell division, chromosome partitioning ;}	{NA}	{NA}	{NA}
WP_039104029.1	{WP_039104029.1; phage tail protein [Klebsiella variicola]}	{kvd:KR75_25575; }	{NA}	{NA}	{NA}	{NA}
WP_039104031.1	{WP_039104031.1; phage tail protein [Klebsiella variicola]}	{kvd:KR75_25585; }	{NA}	{NA}	{NA}	{NA}
WP_039104034.1	{KMG69106.1; ATP-dependent Clp endopeptidase, proteolytic subunit ClpP [Klebsiella pneumoniae]}	{kvd:KR75_25605; }	{YP_004215230; COG0740 ATP-dependent protease ClpP, protease subunit O Posttranslational modification, protein turnover, chaperones ;}	{GO:0016021; integral to membrane; cellular_component}	{NA}	{NA}
WP_039104036.1	{WP_039104036.1; DNA packaging protein [Klebsiella variicola]}	{kvd:KR75_25620; }	{YP_003612193; COG5525 Phage terminase, large subunit GpA X Mobilome: prophages, transposons;}	{NA}	{NA}	{NA}
WP_039104040.1	{WP_039104040.1; hypothetical protein [Klebsiella variicola|Klebsiella variicola,]}	{kvd:KR75_25650; }	{NA}	{NA}	{NA}	{NA}
WP_039104049.1	{WP_039104049.1; MULTISPECIES: hypothetical protein [Klebsiella|Klebsiella pneumoniae,|Klebsiella variicola,]}	{kvd:KR75_25685; }	{NA}	{NA}	{NA}	{NA}
WP_039104051.1	{WP_039104051.1; MULTISPECIES: antitermination protein [Klebsiella|Klebsiella variicola]}	{kvd:KR75_25695; }	{NA}	{GO:0003677; DNA binding; molecular_function GO:0060567; negative regulation of transcription termination, DNA-dependent; biological_process}	{NA}	{NA}
WP_039104053.1	{WP_039104053.1; MULTISPECIES: hypothetical protein [Klebsiella|Klebsiella variicola,]}	{kvd:KR75_25700; }	{YP_004215244; COG1403 5-methylcytosine-specific restriction endonuclease McrA V Defense mechanisms ;}	{NA}	{NA}	{NA}
WP_039104055.1	{WP_039104055.1; MULTISPECIES: DNA methylase [Klebsiella|Klebsiella variicola]}	{kvd:KR75_25710; K06223 dam DNA adenine methylase 2.1.1.72 Genetic Information Processing; Replication and repair; Mismatch repair [PATH:ko03430] }	{YP_128524; COG0338 Site-specific DNA-adenine methylase L Replication, recombination and repair ;}	{GO:0032775; DNA methylation on adenine; biological_process GO:0009007; site-specific DNA-methyltransferase (adenine-specific) activity; molecular_function}	{NA}	{NA}
WP_039104057.1	{WP_039104057.1; Conserved phage C-terminus (Phg_2220_C) [Klebsiella pneumoniae]}	{kvd:KR75_25715; }	{NA}	{NA}	{NA}	{NA}
WP_039104060.1	{WP_039104060.1; transcriptional regulator [Klebsiella variicola]}	{kvd:KR75_25730; }	{YP_003210082; COG2932 Phage repressor protein C, contains Cro/C1-type HTH and peptisase s24 domains X Mobilome: prophages, transposons;}	{GO:0005622; intracellular; cellular_component GO:0003677; DNA binding; molecular_function GO:0006355; regulation of transcription, DNA-dependent; biological_process GO:0043565; sequence-specific DNA binding; molecular_function GO:0003700; sequence-specific DNA binding transcription factor activity; molecular_function}	{NA}	{NA}
WP_039104065.1	{WP_039104065.1; MULTISPECIES: phosphoadenosine phosphosulfate reductase [Klebsiella|Klebsiella variicola]}	{kvd:KR75_25755; }	{YP_003982817; COG0175 3'-phosphoadenosine 5'-phosphosulfate sulfotransferase (PAPS reductase)/FAD synthetase or related enzyme EH Amino acid transport and metabolism ; Coenzyme transport and metabolism ;}	{GO:0003824; NA GO:0008152; NA}	{NA}	{NA}
WP_039104067.1	{WP_039104067.1; MULTISPECIES: hypothetical protein [Klebsiella|Klebsiella variicola,]}	{kvd:KR75_25760; }	{NA}	{GO:0009372; quorum sensing; biological_process GO:0006810; transport; biological_process GO:0019898; extrinsic to membrane; cellular_component GO:0043093; cytokinesis by binary fission; biological_process GO:0003677; DNA binding; molecular_function GO:0051382; kinetochore assembly; biological_process GO:0000776; kinetochore; cellular_component GO:0016032; NA GO:0000917; barrier septum formation;…	{NA}	{NA}
WP_039104069.1	{WP_039104069.1; MULTISPECIES: HNH endonuclease [Klebsiella|Klebsiella pneumoniae|Klebsiella variicola]}	{kvd:KR75_25765; }	{YP_003611034; COG1403 5-methylcytosine-specific restriction endonuclease McrA V Defense mechanisms ;}	{GO:0003676; nucleic acid binding; molecular_function GO:0004519; endonuclease activity; molecular_function}	{NA}	{NA}
WP_039104070.1	{WP_039104070.1; MULTISPECIES: hypothetical protein [Klebsiella|Klebsiella variicola,]}	{kvd:KR75_25770; }	{NA}	{NA}	{NA}	{NA}
WP_039104131.1	{WP_039104131.1; MULTISPECIES: lipopolysaccharide biosynthesis protein [Enterobacteriaceae|Escherichia coli|Klebsiella variicola]}	{kvd:KR75_26345; }	{YP_004214306; COG2244 Membrane protein involved in the export of O-antigen and teichoic acid M Cell wall/membrane/envelope biogenesis ;}	{GO:0000271; polysaccharide biosynthetic process; biological_process GO:0016020; membrane; cellular_component}	{NA}	{NA}
WP_039104133.1	{WP_039104133.1; Capsular polysaccharide biosynthesis protein [Klebsiella pneumoniae]}	{kvd:KR75_26350; }	{NA}	{GO:0016757; transferase activity, transferring glycosyl groups; molecular_function}	{NA}	{NA}
WP_039104134.1	{WP_039104134.1; MULTISPECIES: hypothetical protein [Enterobacteriaceae|Klebsiella variicola,]}	{kvd:KR75_26355; }	{NA}	{NA}	{NA}	{NA}
WP_039104195.1	{WP_039104195.1; integrase [Klebsiella variicola]}	{kvd:KR75_10940; }	{NP_313269; COG0582 Integrase LX Replication, recombination and repair ; Mobilome: prophages, transposons;}	{GO:0003677; DNA binding; molecular_function GO:0015074; DNA integration; biological_process GO:0006310; DNA recombination; biological_process}	{NA}	{NA}
WP_039104199.1	{WP_039104199.1; transcriptional regulator [Klebsiella variicola]}	{kvd:KR75_10985; }	{NP_313279; COG1396 Transcriptional regulator, contains XRE-family HTH domain K Transcription ;}	{GO:0043565; sequence-specific DNA binding; molecular_function}	{NA}	{NA}
WP_039104246.1	{WP_039104246.1; MarR family transcriptional regulator [Klebsiella variicola]}	{kvd:KR75_17920; }	{NA}	{GO:0005622; intracellular; cellular_component GO:0003677; DNA binding; molecular_function GO:0006355; regulation of transcription, DNA-dependent; biological_process GO:0003700; sequence-specific DNA binding transcription factor activity; molecular_function GO:0043565; sequence-specific DNA binding; molecular_function}	{NA}	{NA}
WP_039104252.1	{WP_039104252.1; hypothetical protein [Klebsiella variicola|Klebsiella variicola,]}	{kvd:KR75_18050; }	{NA}	{NA}	{NA}	{NA}
WP_039104296.1	{WP_039104296.1; LysR family transcriptional regulator [Klebsiella variicola]}	{kvd:KR75_23720; K03566 gcvA LysR family transcriptional regulator, glycine cleavage system transcriptional activator -- Cellular Processes; Cellular community - prokaryotes; Biofilm formation - Escherichia coli [PATH:ko02026] }	{YP_004119153; COG0583 DNA-binding transcriptional regulator, LysR family K Transcription ;}	{GO:0006355; regulation of transcription, DNA-dependent; biological_process GO:0003700; sequence-specific DNA binding transcription factor activity; molecular_function}	{NA}	{NA}
WP_040107894.1	{WP_040107894.1; PTS sugar transporter subunit IIA (plasmid) [Klebsiella variicola]}	{kvd:KR75_26475; }	{YP_001086942; COG2190 Phosphotransferase system IIA component G Carbohydrate transport and metabolism ;}	{GO:0016020; membrane; cellular_component GO:0008982; protein-N(PI)-phosphohistidine-sugar phosphotransferase activity; molecular_function GO:0005351; sugar:hydrogen symporter activity; molecular_function GO:0009401; phosphoenolpyruvate-dependent sugar phosphotransferase system; biological_process}	{NA}	{NA}
WP_040107895.1	{WP_040107895.1; glucohydrolase (plasmid) [Klebsiella variicola]}	{kvd:KR75_26480; K01187 malZ alpha-glucosidase 3.2.1.20 Metabolism; Carbohydrate metabolism; Galactose metabolism [PATH:ko00052] Metabolism; Carbohydrate metabolism; Starch and sucrose metabolism [PATH:ko00500] }	{YP_004886707; COG0366 Glycosidase G Carbohydrate transport and metabolism ;}	{GO:0043169; cation binding; molecular_function GO:0005975; carbohydrate metabolic process; biological_process GO:0003824; NA}	{NA}	{NA}
WP_040107896.1	{WP_040107896.1; LacI family transcriptional regulator (plasmid) [Klebsiella variicola]}	{kvd:KR75_26485; }	{YP_004886706; COG1609 DNA-binding transcriptional regulator, LacI/PurR family K Transcription ;}	{GO:0003677; DNA binding; molecular_function GO:0006355; regulation of transcription, DNA-dependent; biological_process GO:0043565; sequence-specific DNA binding; molecular_function GO:0003700; sequence-specific DNA binding transcription factor activity; molecular_function}	{NA}	{NA}
WP_040107899.1	{WP_040107899.1; hypothetical protein KR75_26505 (plasmid) [Klebsiella variicola]}	{kvd:KR75_26505; }	{NA}	{NA}	{NA}	{NA}
WP_040107900.1	{WP_040107900.1; hypothetical protein KR75_26510 (plasmid) [Klebsiella variicola]}	{kvd:KR75_26510; }	{NA}	{NA}	{NA}	{NA}
WP_040107901.1	{WP_040107901.1; hypothetical protein KR75_26515 (plasmid) [Klebsiella variicola]}	{kvd:KR75_26515; }	{NA}	{GO:0006284; base-excision repair; biological_process}	{NA}	{NA}
WP_040107903.1	{WP_040107903.1; hypothetical protein KR75_26540 (plasmid) [Klebsiella variicola]}	{kvd:KR75_26540; }	{NA}	{NA}	{NA}	{NA}
WP_040107904.1	{WP_040107904.1; hypothetical protein KR75_26545 (plasmid) [Klebsiella variicola]}	{kvd:KR75_26545; }	{NA}	{GO:0017000; antibiotic biosynthetic process; biological_process GO:0016787; hydrolase activity; molecular_function}	{NA}	{NA}
WP_040107905.1	{WP_040107905.1; hypothetical protein KR75_26550 (plasmid) [Klebsiella variicola]}	{kvd:KR75_26550; }	{NA}	{NA}	{NA}	{NA}
WP_040107906.1	{WP_040107906.1; hypothetical protein KR75_26555 (plasmid) [Klebsiella variicola]}	{kvd:KR75_26555; }	{NA}	{NA}	{NA}	{NA}
WP_040107909.1	{WP_040107909.1; hypothetical protein KR75_26630 (plasmid) [Klebsiella variicola]}	{kvd:KR75_26630; }	{YP_007874021; COG3706 Two-component response regulator, PleD family, consists of two REC domains and a diguanylate cyclase (GGDEF) domain TK Signal transduction mechanisms ; Transcription ;}	{GO:0009058; biosynthetic process; biological_process GO:0003933; GTP cyclohydrolase activity; molecular_function}	{NA}	{NA}
WP_040107929.1	{WP_040107929.1; hypothetical protein KR75_26845 (plasmid) [Klebsiella variicola]}	{kvd:KR75_26845; }	{NA}	{NA}	{NA}	{NA}
WP_040107930.1	{WP_040107930.1; hypothetical protein KR75_26855 (plasmid) [Klebsiella variicola]}	{kvd:KR75_26855; }	{NA}	{NA}	{NA}	{NA}
WP_040107935.1	{WP_040107935.1; hypothetical protein KR75_26880 (plasmid) [Klebsiella variicola]}	{kvd:KR75_26880; }	{NA}	{GO:0019076; release of virus from host; biological_process GO:0033644; host cell membrane; cellular_component GO:0032801; receptor catabolic process; biological_process GO:0005261; cation channel activity; molecular_function}	{NA}	{NA}
WP_040107946.1	{WP_040107946.1; hypothetical protein KR75_26930 (plasmid) [Klebsiella variicola]}	{kvd:KR75_26930; }	{NA}	{GO:0009539; photosystem II reaction center; cellular_component GO:0009523; photosystem II; cellular_component GO:0009401; phosphoenolpyruvate-dependent sugar phosphotransferase system; biological_process GO:0016020; membrane; cellular_component GO:0015979; photosynthesis; biological_process GO:0016021; integral to membrane; cellular_component}	{NA}	{NA}
WP_040107947.1	{WP_040107947.1; hypothetical protein KR75_26935 (plasmid) [Klebsiella variicola]}	{kvd:KR75_26935; }	{NA}	{NA}	{NA}	{NA}
WP_040107949.1	{WP_040107949.1; hypothetical protein KR75_26950 (plasmid) [Klebsiella variicola]}	{kvd:KR75_26950; K07126 K07126 uncharacterized protein -- }	{YP_003626570; COG0790 TPR repeat T Signal transduction mechanisms ;}	{NA}	{NA}	{NA}
WP_040107956.1	{WP_040107956.1; CAAX protease (plasmid) [Klebsiella variicola]}	{kvd:KR75_26985; K07052 K07052 uncharacterized protein -- }	{NA}	{GO:0016020; membrane; cellular_component}	{NA}	{NA}
WP_040107957.1	{WP_040107957.1; peptidase C39 (plasmid) [Klebsiella variicola]}	{kvd:KR75_26995; K13409 raxB, cvaB ATP-binding cassette, subfamily B, bacterial RaxB -- Environmental Information Processing; Membrane transport; ABC transporters [PATH:ko02010] Organismal Systems; Environmental adaptation; Plant-pathogen interaction [PATH:ko04626] }	{YP_008159156; COG2274 ABC-type bacteriocin/lantibiotic exporters, contain an N-terminal double-glycine peptidase domain V Defense mechanisms ;}	{GO:0098519; NA GO:0016021; integral to membrane; cellular_component GO:0006810; transport; biological_process GO:0005524; ATP binding; molecular_function GO:0042626; ATPase activity, coupled to transmembrane movement of substances; molecular_function GO:0016887; ATPase activity; molecular_function GO:0003924; GTPase activity; molecular_function GO:0006508; proteolysis; biological_process GO:0055…	{NA}	{NA}
WP_040107960.1	{WP_040107960.1; MULTISPECIES: peptide transporter [Klebsiella|Klebsiella pneumoniae]}	{kvd:KR75_27010; }	{YP_008160531; COG2831 Hemolysin activation/secretion protein U Intracellular trafficking, secretion, and vesicular transport ;}	{NA}	{VFG036037; CVF747 Contact-dependent inhibition CDI system cdiB hemolysin activator HlyB - - - -}	{NA}
WP_040107962.1	{WP_040107962.1; hemagglutinin (plasmid) [Klebsiella variicola]}	{kvd:KR75_27015; K15125 fhaB filamentous hemagglutinin -- Human Diseases; Infectious diseases; Pertussis [PATH:ko05133] }	{NP_930296; COG3210 Large exoprotein involved in heme utilization or adhesion U Intracellular trafficking, secretion, and vesicular transport ;}	{NA}	{NA}	{NA}
WP_040107982.1	{WP_040107982.1; hypothetical protein KR75_26535 (plasmid) [Klebsiella variicola]}	{kvd:KR75_26535; }	{NA}	{NA}	{NA}	{NA}
WP_040107984.1	{WP_040107984.1; Probable manganese-dependent inorganic pyrophosphatase [Klebsiella oxytoca|Klebsiella pneumoniae]}	{kpk:A593_26160; K15986 ppaC manganese-dependent inorganic pyrophosphatase 3.6.1.1 Metabolism; Energy metabolism; Oxidative phosphorylation [PATH:ko00190] }	{YP_003611006; COG1227 Inorganic pyrophosphatase/exopolyphosphatase CP Energy production and conversion ; Inorganic ion transport and metabolism ;}	{GO:0030145; manganese ion binding; molecular_function GO:0016787; hydrolase activity; molecular_function GO:0016462; pyrophosphatase activity; molecular_function GO:0005737; cytoplasm; cellular_component}	{NA}	{NA}
WP_040107991.1	{WP_040107991.1; conjugal transfer protein TrbJ (plasmid) [Klebsiella variicola]}	{kvd:KR75_26800; }	{NA}	{GO:0003700; sequence-specific DNA binding transcription factor activity; molecular_function GO:0016987; sigma factor activity; molecular_function GO:0006352; transcription initiation, DNA-dependent; biological_process GO:0003677; DNA binding; molecular_function GO:0006355; regulation of transcription, DNA-dependent; biological_process}	{NA}	{NA}
WP_040107996.1	{WP_040107996.1; hypothetical protein KR75_26980 (plasmid) [Klebsiella variicola]}	{kvd:KR75_26980; }	{NA}	{NA}	{NA}	{NA}
WP_040107998.1	{WP_040107998.1; secretion protein HlyD (plasmid) [Klebsiella variicola]}	{kvd:KR75_26990; K13408 raxA membrane fusion protein -- Organismal Systems; Environmental adaptation; Plant-pathogen interaction [PATH:ko04626] }	{YP_008159155; COG0845 Multidrug efflux pump subunit AcrA (membrane-fusion protein) MV Cell wall/membrane/envelope biogenesis ; Defense mechanisms ;}	{GO:0008134; transcription factor binding; molecular_function GO:0045502; dynein binding; molecular_function GO:0055114; oxidation-reduction process; biological_process GO:0005643; nuclear pore; cellular_component GO:0006606; protein import into nucleus; biological_process GO:0006281; DNA repair; biological_process GO:0009401; phosphoenolpyruvate-dependent sugar phosphotransferase system; biologi…	{NA}	{NA}
WP_040108014.1	{WP_040108014.1; chromosome partitioning protein ParB (plasmid) [Klebsiella variicola]}	{kvd:KR75_27120; K03497 parB, spo0J chromosome partitioning protein, ParB family -- }	{YP_003602561; COG1475 Chromosome segregation protein Spo0J, contains ParB-like nuclease domain D Cell cycle control, cell division, chromosome partitioning ;}	{NA}	{NA}	{NA}
WP_040108053.1	{WP_040108053.1; hypothetical protein KR75_27265 (plasmid) [Klebsiella variicola]}	{kvd:KR75_27265; }	{NA}	{NA}	{NA}	{NA}
WP_040108055.1	{WP_040108055.1; hypothetical protein KR75_27270 (plasmid) [Klebsiella variicola]}	{kvd:KR75_27270; }	{NA}	{NA}	{NA}	{NA}
WP_040108063.1	{WP_040108063.1; DNA polymerase III subunit epsilon (plasmid) [Klebsiella variicola]}	{kvd:KR75_27335; }	{YP_005885685; COG0847 DNA polymerase III, epsilon subunit or related 3'-5' exonuclease L Replication, recombination and repair ;}	{NA}	{NA}	{NA}
WP_040108069.1	{WP_040108069.1; origin of replication binding family protein (plasmid) [Klebsiella variicola]}	{kvd:KR75_27365; K06919 K06919 putative DNA primase/helicase -- }	{NA}	{GO:0003688; DNA replication origin binding; molecular_function GO:0004719; protein-L-isoaspartate (D-aspartate) O-methyltransferase activity; molecular_function GO:0006260; DNA replication; biological_process GO:0006464; protein modification process; biological_process GO:0005524; ATP binding; molecular_function}	{NA}	{NA}
WP_040108071.1	{WP_040108071.1; hypothetical protein KR75_27370 (plasmid) [Klebsiella pneumoniae,|Klebsiella variicola]}	{kvd:KR75_27370; }	{NA}	{GO:0005634; nucleus; cellular_component GO:0004871; signal transducer activity; molecular_function GO:0007166; cell surface receptor linked signaling pathway; biological_process}	{NA}	{NA}
WP_040108074.1	{WP_040108074.1; hypothetical protein KR75_27375 (plasmid) [Klebsiella pneumoniae,|Klebsiella variicola]}	{kvd:KR75_27375; }	{NA}	{NA}	{NA}	{NA}
WP_040108080.1	{WP_040108080.1; hypothetical protein KR75_27395 (plasmid) [Klebsiella pneumoniae,|Klebsiella variicola]}	{kvd:KR75_27395; }	{NA}	{NA}	{NA}	{NA}
WP_040108083.1	{WP_040108083.1; hypothetical protein KR75_27400 (plasmid) [Klebsiella variicola]}	{kvd:KR75_27400; }	{YP_454772; COG3617 Prophage antirepressor X Mobilome: prophages, transposons;}	{NA}	{NA}	{NA}
WP_040108085.1	{WP_040108085.1; protelomerase (plasmid) [Klebsiella variicola]}	{kvd:KR75_27405; }	{NA}	{NA}	{NA}	{NA}
WP_042047326.1	{WP_042047326.1; hypothetical protein [Escherichia coli|Escherichia coli,]}	{kpm:KPHS_35650; }	{NA}	{GO:0008198; ferrous iron binding; molecular_function GO:0016491; oxidoreductase activity; molecular_function GO:0006725; cellular aromatic compound metabolic process; biological_process GO:0009058; biosynthetic process; biological_process}	{NA}	{NA}
WP_042047328.1	{WP_042047328.1; MULTISPECIES: hypothetical protein [Enterobacteriaceae|Escherichia coli,|Klebsiella variicola,]}	{kvd:KR75_27505; }	{YP_004114219; COG1215 Glycosyltransferase, catalytic subunit of cellulose synthase and poly-beta-1,6-N-acetylglucosamine synthase N Cell motility ;}	{NA}	{NA}	{NA}
WP_046621208.1	{CEL85604.1; conserved hypothetical protein [Klebsiella variicola]}	{kmi:VW41_06655; }	{YP_574304; COG4104 Zn-binding Pro-Ala-Ala-Arg (PAAR) domain, incolved in TypeVI secretion U Intracellular trafficking, secretion, and vesicular transport ;}	{NA}	{VFG035226; CVF734 SCI-I T6SS c3396 hypothetical protein - - - -}	{NA}
WP_048325012.1	{WP_048325012.1; MULTISPECIES: hypothetical protein [Klebsiella|Klebsiella variicola,]}	{kvd:KR75_27515; }	{NA}	{NA}	{NA}	{NA}
WP_052251445.1	{WP_052512551.1; conserved hypothetical protein [Klebsiella variicola]}	{kvd:KR75_02410; }	{NA}	{NA}	{NA}	{NA}
WP_052251447.1	{WP_052251447.1; hypothetical protein [Klebsiella variicola|Klebsiella variicola,]}	{kvd:KR75_27480; }	{NA}	{NA}	{NA}	{NA}
WP_052251456.1	{WP_052251456.1; hypothetical protein [Klebsiella variicola|Klebsiella variicola,]}	{kvd:KR75_27730; }	{NA}	{NA}	{NA}	{NA}
WP_052251460.1	{WP_052251460.1; hypothetical protein [Klebsiella variicola|Klebsiella variicola,]}	{kvd:KR75_27665; }	{NA}	{GO:0070526; threonylcarbamoyladenosine biosynthetic process; biological_process}	{NA}	{NA}
WP_052251462.1	{WP_052251462.1; replication protein A [Klebsiella variicola]}	{kvd:KR75_16400; }	{NA}	{GO:0006260; DNA replication; biological_process}	{NA}	{NA}
WP_052251464.1	{WP_052251464.1; hypothetical protein [Klebsiella variicola|Klebsiella variicola,]}	{kvd:KR75_27660; }	{NA}	{NA}	{NA}	{NA}
WP_052251473.1	{WP_052251473.1; hypothetical protein [Klebsiella variicola|Klebsiella variicola,]}	{kvd:KR75_27615; }	{NA}	{GO:0005524; ATP binding; molecular_function}	{NA}	{NA}
WP_052251475.1	{WP_052251475.1; hypothetical protein [Klebsiella variicola|Klebsiella variicola,]}	{kvd:KR75_27610; }	{NA}	{GO:0008289; lipid binding; molecular_function GO:0005576; NA GO:0006869; lipid transport; biological_process}	{NA}	{NA}
WP_052251479.1	{WP_052251479.1; hypothetical protein [Klebsiella variicola|Klebsiella variicola,]}	{kvd:KR75_27600; }	{NA}	{GO:0005507; copper ion binding; molecular_function}	{NA}	{NA}
WP_052251484.1	{WP_052251484.1; hypothetical protein [Klebsiella variicola|Klebsiella variicola,]}	{kvd:KR75_27590; }	{NA}	{NA}	{NA}	{NA}
WP_052251491.1	{WP_052251491.1; hypothetical protein [Klebsiella variicola|Klebsiella variicola,]}	{kvd:KR75_27550; }	{NA}	{NA}	{NA}	{NA}
WP_052251501.1	{WP_052251501.1; MULTISPECIES: hypothetical protein [Klebsiella|Klebsiella variicola,]}	{kvd:KR75_27695; }	{NA}	{GO:0005524; ATP binding; molecular_function GO:0006418; tRNA aminoacylation for protein translation; biological_process GO:0004812; aminoacyl-tRNA ligase activity; molecular_function GO:0000166; nucleotide binding; molecular_function}	{NA}	{NA}
WP_052251505.1	{WP_052251505.1; helicase IV [Klebsiella variicola]}	{kvd:KR75_27585; K03658 helD DNA helicase IV 3.6.4.12 }	{YP_005377705; COG0551 ssDNA-binding Zn-finger and Zn-ribbon domains of topoisomerase 1 L Replication, recombination and repair ;}	{GO:0003677; DNA binding; molecular_function GO:0016787; hydrolase activity; molecular_function GO:0003916; DNA topoisomerase activity; molecular_function GO:0006265; DNA topological change; biological_process GO:0005524; ATP binding; molecular_function GO:0005694; chromosome; cellular_component}	{NA}	{NA}
WP_052251509.1	{WP_063106367.1; porin [Klebsiella variicola]}	{kvd:KR75_26470; K16077 scrY sucrose porin -- }	{YP_007874736; COG4580 Maltoporin (phage lambda and maltose receptor) G Carbohydrate transport and metabolism ;}	{GO:0006810; transport; biological_process GO:0016020; membrane; cellular_component}	{NA}	{NA}
WP_052251511.1	{WP_052251511.1; MULTISPECIES: PifA [Enterobacteriaceae]}	{kvd:KR75_26520; }	{YP_003212776; COG4928 Predicted P-loop ATPase, KAP-like R General function prediction only ;}	{GO:0006139; nucleobase, nucleoside, nucleotide and nucleic acid metabolic process; biological_process GO:0016773; phosphotransferase activity, alcohol group as acceptor; molecular_function GO:0005524; ATP binding; molecular_function}	{NA}	{NA}
WP_052251518.1	{WP_052251518.1; hypothetical protein KR75_27775 (plasmid) [Klebsiella variicola]}	{kvd:KR75_27775; }	{NA}	{NA}	{NA}	{NA}
WP_052251520.1	{ESN30370.1; Uncharacterised protein [Klebsiella oxytoca|Klebsiella pneumoniae]}	{kvd:KR75_27780; }	{NA}	{GO:0043565; sequence-specific DNA binding; molecular_function GO:0003700; sequence-specific DNA binding transcription factor activity; molecular_function GO:0005634; nucleus; cellular_component GO:0006355; regulation of transcription, DNA-dependent; biological_process}	{NA}	{NA}
WP_065912077.1	{WP_065912077.1; hypothetical protein [Klebsiella variicola|Klebsiella variicola,]}	{kvd:KR75_27605; }	{NA}	{GO:0003700; sequence-specific DNA binding transcription factor activity; molecular_function GO:0006355; regulation of transcription, DNA-dependent; biological_process GO:0005622; intracellular; cellular_component}	{NA}	{NA}
WP_065912083.1	{WP_065912083.1; hypothetical protein [Klebsiella variicola|Klebsiella variicola,]}	{kvd:KR75_27670; }	{NA}	{NA}	{NA}	{NA}
WP_071600394.1	{EMH91681.1; hypothetical protein [Klebsiella pneumoniae JHCK1, MTE1_4671]}	{ear:CCG32063; }	{NA}	{NA}	{NA}	{NA}
WP_071787366.1	{EOY64212.1; hypothetical protein [Klebsiella pneumoniae]}	{kqv:B8P98_03075; }	{NA}	{NA}	{NA}	{NA}
WP_071823359.1	{SAE38905.1; Uncharacterised protein [Enterobacter cloacae]}	{eas:Entas_4354; }	{NA}	{NA}	{NA}	{NA}
WP_071826202.1	{AKN35369.1; microcin S-like precursor [Enterobacter ludwigii]}	{cfar:CI104_27475; }	{NA}	{NA}	{NA}	{NA}
WP_071885095.1	{WP_032072055.1; hypothetical protein KPNJ1_05706 (plasmid) [Klebsiella pneumoniae|Klebsiella pneumoniae,]}	{kpa:KPNJ1_05706; }	{NA}	{NA}	{NA}	{NA}
WP_071891514.1	{AHE42207.1; hypothetical protein [Klebsiella pneumoniae subsp. pneumoniae Kp13, KP13_00297]}	{cfar:CI104_01110; }	{NA}	{NA}	{NA}	{NA}
WP_071983236.1	{ESN34088.1; hypothetical protein [Klebsiella pneumoniae MGH 19, L365_03527]}	{kqv:B8P98_03785; }	{YP_001982067; COG4913 Uncharacterized protein YPO0396 S Function unknown ;}	{GO:0003677; DNA binding; molecular_function GO:0007049; cell cycle; biological_process GO:0006576; cellular biogenic amine metabolic process; biological_process GO:0016887; ATPase activity; molecular_function GO:0000166; nucleotide binding; molecular_function GO:0016021; integral to membrane; cellular_component GO:0006810; transport; biological_process GO:0005524; ATP binding; molecular_function…	{NA}	{NA}
WP_071983247.1	{CZQ24812.1; rhamnosyltransferase [Klebsiella pneumoniae]}	{ror:RORB6_02045; K12992 rfbN rhamnosyltransferase 2.4.1.- Cellular Processes; Cellular community - prokaryotes; Biofilm formation - Pseudomonas aeruginosa [PATH:ko02025] }	{YP_007872659; COG1216 Glycosyltransferase, GT2 family G Carbohydrate transport and metabolism ;}	{GO:0016757; transferase activity, transferring glycosyl groups; molecular_function}	{NA}	{NA}
WP_071983260.1	{KMI29452.1; ComEC family competence protein [Klebsiella pneumoniae]}	{NA}	{NA}	{GO:0016787; hydrolase activity; molecular_function}	{NA}	{NA}
WP_071983265.1	{EWF43664.1; hypothetical protein [Klebsiella pneumoniae BWH 15, L396_07150]}	{kpk:A593_00065; }	{NA}	{NA}	{NA}	{NA}
WP_071983267.1	{WP_039103829.1; hypothetical protein [Klebsiella variicola|Klebsiella variicola,]}	{kvd:KR75_23740; }	{YP_004846897; COG1131 ABC-type multidrug transport system, ATPase component V Defense mechanisms ;}	{GO:0006355; regulation of transcription, DNA-dependent; biological_process GO:0016887; ATPase activity; molecular_function GO:0005524; ATP binding; molecular_function}	{NA}	{NA}
WP_071983281.1	{KDH28412.1; conserved membrane hypothetical protein [Klebsiella pneumoniae|Klebsiella variicola]}	{cnt:JT31_02160; }	{NA}	{GO:0000160; two-component signal transduction system (phosphorelay); biological_process GO:0071555; cell wall organization; biological_process GO:0004673; protein histidine kinase activity; molecular_function GO:0016021; integral to membrane; cellular_component GO:0000155; two-component sensor activity; molecular_function}	{NA}	{NA}
WP_071983289.1	{WP_023993350.1; modification methylase, putative [Salmonella enterica subsp. enterica serovar Infantis]}	{cfar:CI104_09415; }	{YP_001031109; COG0863 DNA modification methylase L Replication, recombination and repair ;}	{GO:0009007; site-specific DNA-methyltransferase (adenine-specific) activity; molecular_function GO:0006306; DNA methylation; biological_process GO:0009452; RNA capping; biological_process GO:0008170; N-methyltransferase activity; molecular_function GO:0008168; methyltransferase activity; molecular_function GO:0003677; DNA binding; molecular_function GO:0032775; DNA methylation on adenine; biolog…	{NA}	{NA}
WP_071983291.1	{WP_047079304.1; hypothetical protein [[Enterobacter] aerogenes|[Enterobacter] aerogenes,]}	{cfar:CI104_09410; }	{YP_007947582; COG1192 Cellulose biosynthesis protein BcsQ N Cell motility ;}	{GO:0005525; GTP binding; molecular_function GO:0006614; SRP-dependent cotranslational protein targeting to membrane; biological_process GO:0016887; ATPase activity; molecular_function GO:0005524; ATP binding; molecular_function GO:0055114; oxidation-reduction process; biological_process GO:0016491; oxidoreductase activity; molecular_function}	{NA}	{NA}
WP_071983293.1	{WP_023993352.1; hypothetical protein [Salmonella enterica|Salmonella enterica,]}	{cfar:CI104_09405; }	{NA}	{NA}	{NA}	{NA}
WP_071983309.1	{KDH27893.1; diaminopropionate ammonia-lyase [Klebsiella pneumoniae]}	{kpa:KPNJ1_03563; K01751 E4.3.1.15 diaminopropionate ammonia-lyase 4.3.1.15 }	{NP_459977; COG1171 Threonine dehydratase E Amino acid transport and metabolism ;}	{NA}	{NA}	{NA}
WP_071983311.1	{NA}	{NA}	{NA}	{NA}	{NA}	{NA}
WP_071983315.1	{WP_001747519.1; Uncharacterised protein [Salmonella enterica subsp. enterica serovar Typhimurium str. DT104]}	{seh:SeHA_C3480; }	{NA}	{NA}	{NA}	{NA}
WP_071983317.1	{WP_024137080.1; hypothetical protein [Salmonella enterica]}	{kpz:KPNIH27_08150; }	{NA}	{NA}	{NA}	{NA}
WP_071983319.1	{WP_064548572.1; hypothetical protein [Kluyvera georgiana]}	{kpz:KPNIH27_08120; }	{NA}	{NA}	{NA}	{NA}
WP_071983331.1	{EUL71802.1; Uncharacterised protein [Enterobacter cloacae]}	{kvd:KR75_10965; }	{NA}	{GO:0006355; regulation of transcription, DNA-dependent; biological_process}	{NA}	{NA}
WP_071983347.1	{CDI21324.1; unnamed protein product [Klebsiella pneumoniae]}	{NA}	{NA}	{NA}	{NA}	{NA}
WP_071983374.1	{EEW41586.1; unnamed protein product (plasmid) [Klebsiella pneumoniae subsp. rhinoscleromatis SB3432]}	{kpr:KPR_p0078; }	{NA}	{NA}	{NA}	{NA}
WP_072124832.1	{CEP30564.1; Predicted protein [Klebsiella variicola]}	{kqu:AVR78_16380; }	{NA}	{GO:0003916; DNA topoisomerase activity; molecular_function GO:0006265; DNA topological change; biological_process GO:0003677; DNA binding; molecular_function}	{NA}	{NA}
WP_072194091.1	{NA}	{NA}	{NA}	{NA}	{NA}	{NA}
WP_072194096.1	{EJK88721.1; hypothetical protein [Klebsiella pneumoniae subsp. pneumoniae DSM 30104, UUU_03190]}	{NA}	{NA}	{NA}	{NA}	{NA}
WP_074115737.1	{ENA24371.1; ash family protein [Escherichia coli]}	{NA}	{NA}	{NA}	{NA}	{NA}
WP_074182494.1	{NA}	{NA}	{NA}	{NA}	{NA}	{NA}
WP_077258813.1	{KGB08225.1; integrase core domain protein [[Enterobacter] aerogenes]}	{ete:ETEE_1354; }	{NP_518544; COG2801 Transposase InsO and inactivated derivatives X Mobilome: prophages, transposons;}	{NA}	{NA}	{NA}
WP_077268490.1	{SBW74700.1; Colicin-A [Klebsiella pneumoniae]}	{kvd:KR75_27785; }	{NA}	{GO:0050829; defense response to Gram-negative bacterium; biological_process GO:0019835; cytolysis; biological_process GO:0016021; integral to membrane; cellular_component}	{NA}	{NA}
WP_077269923.1	{EJK90086.1; hypothetical protein [Klebsiella pneumoniae subsp. pneumoniae DSM 30104, UUU_32060]}	{NA}	{NA}	{NA}	{NA}	{NA}
WP_077269925.1	{CZQ24814.1; carbohydrate lyase [Klebsiella pneumoniae]}	{kpm:KPHS_35640; }	{NA}	{NA}	{NA}	{NA}
WP_077269933.1	{KMH08805.1; hypothetical protein [Klebsiella pneumoniae, SM62_01390]}	{kpa:KPNJ1_02463; }	{NA}	{NA}	{NA}	{NA}
WP_077269935.1	{WP_064573024.1; hypothetical protein [Hafnia paralvei]}	{moc:BB934_34755; }	{YP_003290608; COG1262 Formylglycine-generating enzyme, required for sulfatase activity, contains SUMF1/FGE domain O Posttranslational modification, protein turnover, chaperones ;}	{NA}	{NA}	{NA}
WP_077269946.1	{WP_060568186.1; hypothetical protein [Klebsiella pneumoniae|Klebsiella pneumoniae,]}	{kpm:KPHS_40350; }	{NA}	{NA}	{NA}	{NA}
WP_077269947.1	{WP_060568186.1; hypothetical protein [Klebsiella pneumoniae|Klebsiella pneumoniae,]}	{kpm:KPHS_40350; }	{NA}	{NA}	{NA}	{NA}
WP_077269951.1	{WP_039103470.1; hypothetical protein [Klebsiella variicola, KR75_21205]}	{kvd:KR75_21205; }	{NA}	{GO:0009055; NA GO:0016021; integral to membrane; cellular_component}	{NA}	{NA}
WP_077269953.1	{CEN66697.1; primosomal protein I [Klebsiella pneumoniae]}	{kox:KOX_17615; }	{NA}	{NA}	{NA}	{NA}
WP_077269963.1	{SBH06663.1; gp24 [Klebsiella pneumoniae]}	{kpo:KPN2242_08810; }	{NA}	{GO:0008134; transcription factor binding; molecular_function GO:0045502; dynein binding; molecular_function GO:0006434; seryl-tRNA aminoacylation; biological_process GO:0006412; translation; biological_process GO:0005622; intracellular; cellular_component GO:0003735; structural constituent of ribosome; molecular_function GO:0004828; serine-tRNA ligase activity; molecular_function GO:0005737; cyt…	{NA}	{NA}
WP_077625544.1	{KHH54042.1; hypothetical protein [Escherichia coli,]}	{sbc:SbBS512_E0389; }	{YP_008849351; COG3328 Transposase (or an inactivated derivative) X Mobilome: prophages, transposons;}	{NA}	{NA}	{NA}

## Sheet: MGH20. unique genes
Gene_id	{KEGG}	{COG}	{GO}	{VFDB}	{ARDB}
Annotation_num	264	117	125	19	0
WP_000140406.1	{ypa:YPA_1290; K05372 ybtA AraC family transcriptional regulator -- }	{YP_002346903; COG2207 AraC-type DNA-binding domain and AraC-containing proteins K Transcription ;}	{GO:0000150; recombinase activity; molecular_function GO:0006352; transcription initiation, DNA-dependent; biological_process GO:0003700; sequence-specific DNA binding transcription factor activity; molecular_function GO:0003677; DNA binding; molecular_function GO:0006310; DNA recombination; biological_process GO:0043565; sequence-specific DNA binding; molecular_function GO:0006355; regulation of…	{VFG000364; VF0136 Yersiniabactin ybtA transcriptional regulator YbtA One of the major differences between low- and high-pathogenicity Yersinia lies in their ability to capture the iron molecules necessary for their systemic dissemination in the host Yeriniabactin belongs to a small sub-group of phenolate siderophores and has an affinity for ferric iron (KD=4 x 10-36) much higher than for ferrous…	{NA}
WP_000784549.1	{ear:CCG29268; K15721 fyuA pesticin/yersiniabactin receptor -- }	{YP_002346897; COG4771 Outer membrane receptor for ferrienterochelin and colicins P Inorganic ion transport and metabolism ;}	{GO:0004872; receptor activity; molecular_function GO:0005215; NA GO:0006810; transport; biological_process GO:0016020; membrane; cellular_component}	{VFG012567; IA006 yersiniabactin fyuA Putative pesticin receptor precursor - - - -}	{NA}
WP_000881071.1	{ack:C380_14350; }	{NA}	{NA}	{NA}	{NA}
WP_001568017.1	{kpz:KPNIH27_29905; }	{NA}	{GO:0009877; nodulation; biological_process GO:0008757; S-adenosylmethionine-dependent methyltransferase activity; molecular_function GO:0009312; oligosaccharide biosynthetic process; biological_process}	{NA}	{NA}
WP_001568036.1	{koc:AB185_00595; K03503 umuD DNA polymerase V 3.4.21.- }	{YP_003602563; COG1974 SOS-response transcriptional repressor LexA (RecA-mediated autopeptidase) KT Transcription ; Signal transduction mechanisms ;}	{NA}	{NA}	{NA}
WP_001568042.1	{koc:AB185_00565; }	{NA}	{NA}	{NA}	{NA}
WP_002212761.1	{ypa:YPA_1292; K06147 ABCB-BAC ATP-binding cassette, subfamily B, bacterial -- }	{YP_002346905; COG1132 ABC-type multidrug transport system, ATPase and permease component V Defense mechanisms ;}	{GO:0016021; integral to membrane; cellular_component GO:0042626; ATPase activity, coupled to transmembrane movement of substances; molecular_function GO:0005524; ATP binding; molecular_function GO:0016301; kinase activity; molecular_function GO:0016887; ATPase activity; molecular_function GO:0055085; transmembrane transport; biological_process GO:0003924; GTPase activity; molecular_function GO:0…	{VFG000366; VF0136 Yersiniabactin ybtQ inner membrane ABC-transporter YbtQ One of the major differences between low- and high-pathogenicity Yersinia lies in their ability to capture the iron molecules necessary for their systemic dissemination in the host Yeriniabactin belongs to a small sub-group of phenolate siderophores and has an affinity for ferric iron (KD=4 x 10-36) much higher than for fe…	{NA}
WP_004131515.1	{koc:AB185_24485; }	{NA}	{NA}	{NA}	{NA}
WP_004139615.1	{kpo:KPN2242_04935; }	{NA}	{GO:0003700; sequence-specific DNA binding transcription factor activity; molecular_function GO:0006275; regulation of DNA replication; biological_process GO:0006270; DNA-dependent DNA replication initiation; biological_process GO:0003677; DNA binding; molecular_function GO:0005524; ATP binding; molecular_function GO:0043565; sequence-specific DNA binding; molecular_function GO:0005622; intracell…	{NA}	{NA}
WP_004150597.1	{ecq:ECED1_2256; }	{NA}	{NA}	{NA}	{NA}
WP_004152629.1	{kpa:KPNJ1_05650; }	{NA}	{GO:0019867; outer membrane; cellular_component GO:0046999; regulation of conjugation; biological_process}	{NA}	{NA}
WP_004178111.1	{kpm:KPHS_34820; K03203 virB8, lvhB8 type IV secretion system protein VirB8 -- Environmental Information Processing; Membrane transport; Bacterial secretion system [PATH:ko03070] }	{YP_001452477; COG3736 Type IV secretory pathway, component VirB8 U Intracellular trafficking, secretion, and vesicular transport ;}	{GO:0016020; membrane; cellular_component}	{NA}	{NA}
WP_004178811.1	{kpo:KPN2242_04930; }	{YP_003611812; COG4197 DNA-binding transcriptional regulator YdaS, prophage-encoded, Cro superfamily K Transcription ;}	{GO:0006334; nucleosome assembly; biological_process GO:0003677; DNA binding; molecular_function GO:0005634; nucleus; cellular_component GO:0043565; sequence-specific DNA binding; molecular_function GO:0000786; nucleosome; cellular_component}	{NA}	{NA}
WP_004213097.1	{koc:AB185_24475; }	{NA}	{NA}	{NA}	{NA}
WP_004213110.1	{koc:AB185_24370; }	{NA}	{NA}	{NA}	{NA}
WP_004213128.1	{koy:J415_19745; }	{NA}	{GO:0046872; metal ion binding; molecular_function GO:0008270; zinc ion binding; molecular_function GO:0005515; protein binding; molecular_function}	{NA}	{NA}
WP_004216461.1	{kpx:PMK1_03547; K06908 K06908 uncharacterized protein -- }	{YP_455248; COG3498 Phage tail tube protein FII X Mobilome: prophages, transposons;}	{NA}	{NA}	{NA}
WP_004216463.1	{koy:J415_19755; K06907 K06907 uncharacterized protein -- }	{NP_310672; COG3497 Phage tail sheath protein FI X Mobilome: prophages, transposons;}	{NA}	{NA}	{NA}
WP_008807811.1	{kpr:KPR_3599; }	{NA}	{NA}	{NA}	{NA}
WP_012968000.1	{kva:Kvar_2249; K00111 glpA, glpD glycerol-3-phosphate dehydrogenase 1.1.5.3 Metabolism; Lipid metabolism; Glycerophospholipid metabolism [PATH:ko00564] }	{YP_006374570; COG0579 L-2-hydroxyglutarate oxidase LhgO G Carbohydrate transport and metabolism ;}	{GO:0016491; oxidoreductase activity; molecular_function GO:0055114; oxidation-reduction process; biological_process}	{NA}	{NA}
WP_012968001.1	{kva:Kvar_2250; }	{YP_996452; COG0446 NADPH-dependent 2,4-dienoyl-CoA reductase, sulfur reductase, or a related oxidoreductase I Lipid transport and metabolism ;}	{GO:0050660; flavin adenine dinucleotide binding; molecular_function GO:0008033; tRNA processing; biological_process GO:0006813; potassium ion transport; biological_process GO:0016491; oxidoreductase activity; molecular_function GO:0055114; oxidation-reduction process; biological_process GO:0004499; flavin-containing monooxygenase activity; molecular_function GO:0016705; oxidoreductase activity, …	{NA}	{NA}
WP_012968002.1	{kva:Kvar_2252; }	{NA}	{NA}	{NA}	{NA}
WP_012968003.1	{kva:Kvar_2253; K04023 eutH ethanolamine transporter -- }	{NP_250182; COG3192 Ethanolamine transporter EutH, required for ethanolamine utilization at low pH E Amino acid transport and metabolism ;}	{GO:0055114; oxidation-reduction process; biological_process GO:0016021; integral to membrane; cellular_component GO:0006784; heme a biosynthetic process; biological_process GO:0016627; oxidoreductase activity, acting on the CH-CH group of donors; molecular_function GO:0034229; ethanolamine transport; biological_process GO:0016020; membrane; cellular_component GO:0034228; ethanolamine transmembra…	{NA}	{NA}
WP_012968004.1	{kva:Kvar_2254; K00864 glpK, GK glycerol kinase 2.7.1.30 Metabolism; Lipid metabolism; Glycerolipid metabolism [PATH:ko00561] Organismal Systems; Endocrine system; PPAR signaling pathway [PATH:ko03320] Organismal Systems; Environmental adaptation; Plant-pathogen interaction [PATH:ko04626] }	{NP_250178; COG0554 Glycerol kinase C Energy production and conversion ;}	{GO:0005975; carbohydrate metabolic process; biological_process GO:0016773; phosphotransferase activity, alcohol group as acceptor; molecular_function}	{NA}	{NA}
WP_012968005.1	{kva:Kvar_2255; }	{NP_250181; COG1349 DNA-binding transcriptional regulator of sugar metabolism, DeoR/GlpR family KG Transcription ; Carbohydrate transport and metabolism ;}	{GO:0005737; cytoplasm; cellular_component GO:0003700; sequence-specific DNA binding transcription factor activity; molecular_function GO:0051775; response to redox state; biological_process GO:0045892; negative regulation of transcription, DNA-dependent; biological_process GO:0005622; intracellular; cellular_component GO:0003677; DNA binding; molecular_function GO:0006355; regulation of transcri…	{NA}	{NA}
WP_012968013.1	{kok:KONIH1_24615; }	{YP_004971179; COG4925 Uncharacterized protein S Function unknown ;}	{NA}	{NA}	{NA}
WP_012968014.1	{kva:Kvar_2265; }	{YP_002238442; COG0583 DNA-binding transcriptional regulator, LysR family K Transcription ;}	{GO:0003700; sequence-specific DNA binding transcription factor activity; molecular_function GO:0006355; regulation of transcription, DNA-dependent; biological_process GO:0043565; sequence-specific DNA binding; molecular_function}	{NA}	{NA}
WP_012968402.1	{kva:Kvar_2959; }	{NA}	{NA}	{NA}	{NA}
WP_012968545.1	{kva:Kvar_3224; K01426 E3.5.1.4, amiE amidase 3.5.1.4 Metabolism; Amino acid metabolism; Arginine and proline metabolism [PATH:ko00330] Metabolism; Amino acid metabolism; Phenylalanine metabolism [PATH:ko00360] Metabolism; Amino acid metabolism; Tryptophan metabolism [PATH:ko00380] Metabolism; Xenobiotics biodegradation and metabolism; Aminobenzoate degradation [PATH:ko00627] Metabolism; Xenobiot…	{YP_004682996; COG0154 Asp-tRNAAsn/Glu-tRNAGln amidotransferase A subunit or related amidase J Translation, ribosomal structure and biogenesis ;}	{GO:0016884; carbon-nitrogen ligase activity, with glutamine as amido-N-donor; molecular_function}	{NA}	{NA}
WP_012968548.1	{kva:Kvar_3227; }	{YP_004119191; COG2814 Predicted arabinose efflux permease, MFS family G Carbohydrate transport and metabolism ;}	{GO:0022857; transmembrane transporter activity; molecular_function GO:0016021; integral to membrane; cellular_component GO:0055085; transmembrane transport; biological_process}	{NA}	{NA}
WP_012968551.1	{kva:Kvar_3230; K01816 hyi, gip hydroxypyruvate isomerase 5.3.1.22 Metabolism; Carbohydrate metabolism; Glyoxylate and dicarboxylate metabolism [PATH:ko00630] }	{YP_008159249; COG3622 Hydroxypyruvate isomerase G Carbohydrate transport and metabolism ;}	{NA}	{NA}	{NA}
WP_015875000.1	{kpu:KP1_3639; }	{NA}	{NA}	{NA}	{NA}
WP_016161078.1	{ron:TE10_15190; }	{YP_003884267; COG0412 Dienelactone hydrolase Q Secondary metabolites biosynthesis, transport and catabolism ;}	{NA}	{NA}	{NA}
WP_016531189.1	{kpa:KPNJ1_04142; }	{NA}	{NA}	{NA}	{NA}
WP_020804196.1	{koe:A225_1389; }	{NA}	{GO:0004222; metalloendopeptidase activity; molecular_function}	{NA}	{NA}
WP_020804290.1	{kpk:A593_03615; }	{NA}	{NA}	{NA}	{NA}
WP_020805613.1	{kok:KONIH1_31905; }	{NA}	{NA}	{NA}	{NA}
WP_021580963.1	{pmr:PMI3470; }	{NA}	{NA}	{NA}	{NA}
WP_023278851.1	{kpu:KP1_3629; K03200 virB5, lvhB5 type IV secretion system protein VirB5 -- Environmental Information Processing; Membrane transport; Bacterial secretion system [PATH:ko03070] }	{NA}	{NA}	{NA}	{NA}
WP_023278858.1	{eum:ECUMN_2275; K04785 irp3, ybtU yersiniabactin synthetase, thiazolinyl reductase component -- Metabolism; Metabolism of terpenoids and polyketides; Biosynthesis of siderophore group nonribosomal peptides [PATH:ko01053] }	{YP_002346900; COG4693 Oxidoreductase (NAD-binding), involved in siderophore biosynthesis P Inorganic ion transport and metabolism ;}	{GO:0016491; oxidoreductase activity; molecular_function}	{VFG000361; VF0136 Yersiniabactin ybtU yersiniabactin biosynthetic protein YbtU One of the major differences between low- and high-pathogenicity Yersinia lies in their ability to capture the iron molecules necessary for their systemic dissemination in the host Yeriniabactin belongs to a small sub-group of phenolate siderophores and has an affinity for ferric iron (KD=4 x 10-36) much higher than f…	{NA}
WP_023296853.1	{kqv:B8P98_27310; }	{YP_004214718; COG0110 Acetyltransferase (isoleucine patch superfamily) R General function prediction only ;}	{GO:0016407; acetyltransferase activity; molecular_function}	{VFG005069; CVF110 Capsule cap8J capsular polysaccharide synthesis enzyme GBS can be suclassified into serotypes according to the immunologic type of the polysaccharide capsule. Of the nine serotypes described so far, the type Ia, Ib, II, III and V are reponsible for the majority of invasive human GBS disease; serotype III is particularly important becasue it causes the majority of infection to n…	{NA}
WP_023339475.1	{etc:ETAC_14740; }	{NA}	{NA}	{NA}	{NA}
WP_023339483.1	{sene:IA1_21950; }	{NA}	{NA}	{NA}	{NA}
WP_023339485.1	{NA}	{NA}	{NA}	{NA}	{NA}
WP_023339491.1	{elr:ECO55CA74_15585; }	{NA}	{NA}	{NA}	{NA}
WP_023339492.1	{bthe:BTN_916; }	{NA}	{NA}	{NA}	{NA}
WP_023339493.1	{pmr:PMI3496; K18831 higA HTH-type transcriptional regulator / antitoxin HigA -- }	{YP_002153178; COG5499 Antitoxin component HigA of the HigAB toxin-antitoxin module, contains an N-terminal HTH domain V Defense mechanisms ;}	{GO:0016021; integral to membrane; cellular_component GO:0004222; metalloendopeptidase activity; molecular_function GO:0005524; ATP binding; molecular_function GO:0008270; zinc ion binding; molecular_function GO:0043565; sequence-specific DNA binding; molecular_function}	{NA}	{NA}
WP_023339494.1	{NA}	{NA}	{GO:0016788; hydrolase activity, acting on ester bonds; molecular_function}	{NA}	{NA}
WP_023339496.1	{eck:EC55989_4900; }	{YP_001455017; COG3481 3'-5' exoribonuclease YhaM, can participate in 23S rRNA maturation, HD superfamily J Translation, ribosomal structure and biogenesis ;}	{GO:0046872; metal ion binding; molecular_function GO:0008081; phosphoric diester hydrolase activity; molecular_function}	{NA}	{NA}
WP_023339497.1	{sbv:N643_19790; }	{YP_001455015; COG4227 Antirestriction protein ArdC L Replication, recombination and repair ;}	{NA}	{NA}	{NA}
WP_023339499.1	{bct:GEM_0259; }	{NA}	{NA}	{NA}	{NA}
WP_023339500.1	{bct:GEM_0258; }	{YP_003846491; COG0470 DNA polymerase III, delta prime subunit L Replication, recombination and repair ;}	{NA}	{NA}	{NA}
WP_023339501.1	{bced:DM42_1774; }	{YP_003846490; COG0175 3'-phosphoadenosine 5'-phosphosulfate sulfotransferase (PAPS reductase)/FAD synthetase or related enzyme EH Amino acid transport and metabolism ; Coenzyme transport and metabolism ;}	{GO:0003824; NA GO:0008152; NA}	{NA}	{NA}
WP_023339502.1	{NA}	{NA}	{GO:0008608; attachment of spindle microtubules to kinetochore; biological_process GO:0006355; regulation of transcription, DNA-dependent; biological_process GO:0000160; two-component signal transduction system (phosphorelay); biological_process GO:0072686; mitotic spindle; cellular_component GO:0005634; nucleus; cellular_component GO:0042729; DASH complex; cellular_component GO:0000156; two-comp…	{NA}	{NA}
WP_023339503.1	{xfr:BER92_16820; }	{NA}	{GO:0005801; cis-Golgi network; cellular_component GO:0003677; DNA binding; molecular_function GO:0007165; signal transduction; biological_process GO:0003824; NA GO:0016020; membrane; cellular_component GO:0006886; intracellular protein transport; biological_process GO:0004871; signal transducer activity; molecular_function GO:0006304; DNA modification; biological_process GO:0005524; ATP binding;…	{NA}	{NA}
WP_023339631.1	{pagc:BEE12_18145; }	{NA}	{NA}	{NA}	{NA}
WP_023339632.1	{pfq:QQ39_06775; }	{NA}	{NA}	{NA}	{NA}
WP_023339681.1	{kpr:KPR_3597; }	{NA}	{GO:0003677; DNA binding; molecular_function GO:0006259; DNA metabolic process; biological_process}	{NA}	{NA}
WP_023339682.1	{kpy:KPNIH31_15270; }	{NA}	{NA}	{NA}	{NA}
WP_023339683.1	{kpr:KPR_3589; }	{NA}	{NA}	{NA}	{NA}
WP_023339684.1	{psts:E05_14500; }	{NA}	{NA}	{NA}	{NA}
WP_023339685.1	{NA}	{NA}	{NA}	{NA}	{NA}
WP_023339689.1	{kpa:KPNJ1_04182; }	{NA}	{NA}	{NA}	{NA}
WP_023339691.1	{kpv:KPNIH29_10145; }	{NA}	{NA}	{NA}	{NA}
WP_023339692.1	{kqv:B8P98_19140; }	{NA}	{NA}	{NA}	{NA}
WP_023339693.1	{kok:KONIH1_09495; }	{NA}	{NA}	{NA}	{NA}
WP_023339696.1	{ror:RORB6_10205; }	{NA}	{GO:0043565; sequence-specific DNA binding; molecular_function GO:0006355; regulation of transcription, DNA-dependent; biological_process GO:0003700; sequence-specific DNA binding transcription factor activity; molecular_function GO:0008270; zinc ion binding; molecular_function}	{NA}	{NA}
WP_023339698.1	{pcv:BCS7_09310; }	{NA}	{NA}	{NA}	{NA}
WP_023339700.1	{koc:AB185_26180; K01185 E3.2.1.17 lysozyme 3.2.1.17 }	{NP_460003; COG3772 Phage-related lysozyme (muramidase), GH24 family M Cell wall/membrane/envelope biogenesis ;}	{GO:0004803; transposase activity; molecular_function GO:0016998; cell wall macromolecule catabolic process; biological_process GO:0003796; lysozyme activity; molecular_function GO:0009253; peptidoglycan catabolic process; biological_process GO:0006313; transposition, DNA-mediated; biological_process}	{NA}	{NA}
WP_023339701.1	{pao:Pat9b_5380; }	{NA}	{NA}	{NA}	{NA}
WP_023339702.1	{elp:P12B_c1866; K14744 rzpD prophage endopeptidase 3.4.-.- }	{NA}	{NA}	{NA}	{NA}
WP_023339705.1	{kpr:KPR_3566; K06909 xtmB phage terminase large subunit -- }	{NP_930135; COG1783 Phage terminase large subunit X Mobilome: prophages, transposons;}	{GO:0006323; DNA packaging; biological_process}	{NA}	{NA}
WP_023339706.1	{kva:Kvar_1795; K09961 K09961 uncharacterized protein -- }	{YP_003209534; COG3567 Uncharacterized protein S Function unknown ;}	{NA}	{NA}	{NA}
WP_023339709.1	{kpy:KPNIH31_15095; }	{YP_003209537; COG3566 Uncharacterized protein S Function unknown ;}	{NA}	{NA}	{NA}
WP_023339710.1	{ced:LH89_20500; }	{NA}	{NA}	{NA}	{NA}
WP_023339711.1	{ced:LH89_20505; }	{YP_007883601; COG1659 Uncharacterized protein, linocin/CFP29 family S Function unknown ;}	{GO:0008233; peptidase activity; molecular_function GO:0042742; defense response to bacterium; biological_process}	{NA}	{NA}
WP_023339712.1	{ced:LH89_20510; }	{NA}	{GO:0005643; nuclear pore; cellular_component GO:0016021; integral to membrane; cellular_component GO:0000774; adenyl-nucleotide exchange factor activity; molecular_function GO:0043565; sequence-specific DNA binding; molecular_function GO:0006355; regulation of transcription, DNA-dependent; biological_process GO:0051087; chaperone binding; molecular_function GO:0015948; methanogenesis; biological…	{NA}	{NA}
WP_023339713.1	{kpk:A593_03630; }	{NA}	{NA}	{NA}	{NA}
WP_023339714.1	{kpo:KPN2242_05090; }	{NA}	{NA}	{NA}	{NA}
WP_023339715.1	{kpo:KPN2242_05095; }	{NA}	{NA}	{NA}	{NA}
WP_023339716.1	{kpo:KPN2242_05105; }	{NA}	{GO:0006355; regulation of transcription, DNA-dependent; biological_process GO:0003700; sequence-specific DNA binding transcription factor activity; molecular_function}	{NA}	{NA}
WP_023339717.1	{kpk:A593_00065; }	{NA}	{NA}	{NA}	{NA}
WP_023339718.1	{kpy:KPNIH31_15055; }	{NA}	{NA}	{NA}	{NA}
WP_023339719.1	{kpy:KPNIH31_15045; }	{YP_003611848; COG5492 Uncharacterized conserved protein YjdB, contains Ig-like domain R General function prediction only ;}	{NA}	{NA}	{NA}
WP_023339720.1	{kpo:KPN2242_05125; }	{NA}	{NA}	{NA}	{NA}
WP_023339721.1	{kpm:KPHS_12810; }	{YP_007273468; COG3646 Phage regulatory protein Rha X Mobilome: prophages, transposons;}	{NA}	{NA}	{NA}
WP_023339724.1	{kpa:KPNJ1_04141; }	{NA}	{NA}	{NA}	{NA}
WP_023339725.1	{kpk:A593_03550; }	{YP_007874245; COG0791 Cell wall-associated hydrolase, NlpC family M Cell wall/membrane/envelope biogenesis ;}	{NA}	{NA}	{NA}
WP_023339726.1	{kpk:A593_03545; }	{YP_007874244; COG4733 Phage-related protein, tail component X Mobilome: prophages, transposons;}	{NA}	{NA}	{NA}
WP_023339731.1	{raq:Rahaq2_4333; K15125 fhaB filamentous hemagglutinin -- Human Diseases; Infectious diseases; Pertussis [PATH:ko05133] }	{NA}	{NA}	{NA}	{NA}
WP_023339846.1	{cfar:CI104_08920; K03466 ftsK, spoIIIE DNA segregation ATPase FtsK/SpoIIIE, S-DNA-T family -- }	{NP_415410; COG1674 DNA segregation ATPase FtsK/SpoIIIE and related proteins D Cell cycle control, cell division, chromosome partitioning ;}	{GO:0006810; transport; biological_process GO:0007049; cell cycle; biological_process GO:0003677; DNA binding; molecular_function GO:0007059; chromosome segregation; biological_process GO:0019083; viral transcription; biological_process GO:0000166; nucleotide binding; molecular_function GO:0051301; cell division; biological_process GO:0005524; ATP binding; molecular_function GO:0016021; integral …	{NA}	{NA}
WP_023339896.1	{pfw:PF1751_v1c28030; }	{NA}	{GO:0005524; ATP binding; molecular_function GO:0016887; ATPase activity; molecular_function}	{NA}	{NA}
WP_023339909.1	{kva:Kvar_3233; K21405 acoR sigma-54 dependent transcriptional regulator, acetoin dehydrogenase operon transcriptional activator AcoR -- }	{YP_008159247; COG3829 Transcriptional regulator containing PAS, AAA-type ATPase, and DNA-binding Fis domains KT Transcription ; Signal transduction mechanisms ;}	{GO:0005515; protein binding; molecular_function GO:0003677; DNA binding; molecular_function GO:0008134; transcription factor binding; molecular_function GO:0005524; ATP binding; molecular_function GO:0006260; DNA replication; biological_process GO:0006355; regulation of transcription, DNA-dependent; biological_process GO:0016887; ATPase activity; molecular_function GO:0043565; sequence-specific …	{VFG019760; CVF518 Type IV pili biosynthesis pilR putative two-component system, response regulator - - - -}	{NA}
WP_023339910.1	{kva:Kvar_3232; K08138 xylE MFS transporter, SP family, xylose:H+ symportor -- }	{YP_002802072; COG2814 Predicted arabinose efflux permease, MFS family G Carbohydrate transport and metabolism ;}	{GO:0022857; transmembrane transporter activity; molecular_function GO:0016021; integral to membrane; cellular_component GO:0055085; transmembrane transport; biological_process}	{NA}	{NA}
WP_023339911.1	{kva:Kvar_3231; K00010 iolG myo-inositol 2-dehydrogenase / D-chiro-inositol 1-dehydrogenase 1.1.1.18 1.1.1.369 Metabolism; Biosynthesis of other secondary metabolites; Streptomycin biosynthesis [PATH:ko00521] Metabolism; Carbohydrate metabolism; Inositol phosphate metabolism [PATH:ko00562] }	{YP_004114263; COG0673 Predicted dehydrogenase R General function prediction only ;}	{GO:0008152; NA GO:0016491; oxidoreductase activity; molecular_function GO:0050661; NADP binding; molecular_function GO:0055114; oxidation-reduction process; biological_process GO:0016051; carbohydrate biosynthetic process; biological_process GO:0048037; cofactor binding; molecular_function}	{NA}	{NA}
WP_023339913.1	{kva:Kvar_3228; }	{YP_004119190; COG1802 DNA-binding transcriptional regulator, GntR family K Transcription ;}	{GO:0003700; sequence-specific DNA binding transcription factor activity; molecular_function GO:0006355; regulation of transcription, DNA-dependent; biological_process}	{NA}	{NA}
WP_023339914.1	{kva:Kvar_3226; }	{YP_004119192; COG1335 Nicotinamidase-related amidase HR Coenzyme transport and metabolism ; General function prediction only ;}	{GO:0008152; NA GO:0003824; NA}	{NA}	{NA}
WP_023339916.1	{kpn:KPN_01396; }	{YP_007874194; COG0456 Ribosomal protein S18 acetylase RimI and related acetyltransferases J Translation, ribosomal structure and biogenesis ;}	{GO:0008080; N-acetyltransferase activity; molecular_function GO:0016747; transferase activity, transferring acyl groups other than amino-acyl groups; molecular_function}	{NA}	{NA}
WP_023339918.1	{kva:Kvar_3217; }	{NA}	{NA}	{NA}	{NA}
WP_023339919.1	{kva:Kvar_3216; }	{YP_006282716; COG3226 DNA-binding transcriptional regulator YbjK K Transcription ;}	{GO:0006614; SRP-dependent cotranslational protein targeting to membrane; biological_process GO:0005525; GTP binding; molecular_function GO:0003677; DNA binding; molecular_function}	{NA}	{NA}
WP_023339926.1	{koc:AB185_24480; }	{NA}	{NA}	{NA}	{NA}
WP_023339927.1	{koc:AB185_24470; }	{NA}	{NA}	{NA}	{NA}
WP_023339928.1	{kpx:PMK1_03517; }	{NA}	{GO:0055114; oxidation-reduction process; biological_process GO:0004318; enoyl-[acyl-carrier-protein] reductase (NADH) activity; molecular_function}	{NA}	{NA}
WP_023339929.1	{kpx:PMK1_03518; }	{NA}	{NA}	{NA}	{NA}
WP_023339930.1	{cif:AL515_20115; }	{YP_003211610; COG0175 3'-phosphoadenosine 5'-phosphosulfate sulfotransferase (PAPS reductase)/FAD synthetase or related enzyme EH Amino acid transport and metabolism ; Coenzyme transport and metabolism ;}	{GO:0008152; NA GO:0003824; NA}	{NA}	{NA}
WP_023339932.1	{koy:J415_19845; }	{NA}	{NA}	{NA}	{NA}
WP_023339933.1	{NA}	{NA}	{GO:0009405; pathogenesis; biological_process GO:0004519; endonuclease activity; molecular_function GO:0003676; nucleic acid binding; molecular_function GO:0016020; membrane; cellular_component}	{NA}	{NA}
WP_023339934.1	{NA}	{NA}	{GO:0005524; ATP binding; molecular_function GO:0016887; ATPase activity; molecular_function}	{NA}	{NA}
WP_023339936.1	{kpx:PMK1_03525; }	{YP_007505457; COG4373 Mu-like prophage FluMu protein gp28 X Mobilome: prophages, transposons;}	{GO:0019069; viral capsid assembly; biological_process GO:0006355; regulation of transcription, DNA-dependent; biological_process GO:0016987; sigma factor activity; molecular_function GO:0005524; ATP binding; molecular_function GO:0006313; transposition, DNA-mediated; biological_process GO:0003677; DNA binding; molecular_function GO:0006352; transcription initiation, DNA-dependent; biological_pro…	{NA}	{NA}
WP_023339937.1	{kpx:PMK1_03526; }	{NA}	{GO:0006914; autophagy; biological_process GO:0009424; bacterial-type flagellum hook; cellular_component GO:0019069; viral capsid assembly; biological_process}	{NA}	{NA}
WP_023339938.1	{kpx:PMK1_03527; }	{NA}	{GO:0019028; viral capsid; cellular_component}	{NA}	{NA}
WP_023339939.1	{kpx:PMK1_03528; }	{NA}	{GO:0003677; DNA binding; molecular_function GO:0019069; viral capsid assembly; biological_process GO:0004519; endonuclease activity; molecular_function}	{NA}	{NA}
WP_023339940.1	{kpx:PMK1_03529; }	{NA}	{GO:0019069; viral capsid assembly; biological_process}	{NA}	{NA}
WP_023339941.1	{kpx:PMK1_03530; }	{YP_003614899; COG5004 P2-like prophage tail protein X X Mobilome: prophages, transposons;}	{GO:0016998; cell wall macromolecule catabolic process; biological_process}	{NA}	{NA}
WP_023339943.1	{koc:AB185_24365; K01185 E3.2.1.17 lysozyme 3.2.1.17 }	{YP_007883591; COG3772 Phage-related lysozyme (muramidase), GH24 family M Cell wall/membrane/envelope biogenesis ;}	{GO:0016998; cell wall macromolecule catabolic process; biological_process GO:0009253; peptidoglycan catabolic process; biological_process GO:0003796; lysozyme activity; molecular_function}	{NA}	{NA}
WP_023339944.1	{kpx:PMK1_03534; }	{NA}	{NA}	{NA}	{NA}
WP_023339945.1	{kpx:PMK1_03535; }	{NP_520049; COG5005 Mu-like prophage protein gpG X Mobilome: prophages, transposons;}	{NA}	{NA}	{NA}
WP_023339946.1	{kpx:PMK1_03536; }	{YP_004211345; COG4540 Phage P2 baseplate assembly protein gpV X Mobilome: prophages, transposons;}	{NA}	{NA}	{NA}
WP_023339947.1	{kpx:PMK1_03537; K06903 K06903 uncharacterized protein -- }	{YP_003883324; COG3628 Phage baseplate assembly protein W X Mobilome: prophages, transposons;}	{NA}	{NA}	{NA}
WP_023339948.1	{koc:AB185_24335; }	{YP_002800866; COG3948 Phage-related baseplate assembly protein X Mobilome: prophages, transposons;}	{GO:0004424; imidazoleglycerol-phosphate dehydratase activity; molecular_function GO:0000105; histidine biosynthetic process; biological_process}	{NA}	{NA}
WP_023339949.1	{NA}	{NA}	{NA}	{NA}	{NA}
WP_023339950.1	{koy:J415_19795; }	{NA}	{NA}	{NA}	{NA}
WP_023339951.1	{koy:J415_19790; }	{NA}	{NA}	{NA}	{NA}
WP_023339952.1	{sei:SPC_0871; }	{NA}	{NA}	{NA}	{NA}
WP_023339953.1	{kpx:PMK1_03543; K06906 K06906 uncharacterized protein -- }	{NP_310666; COG3499 Phage protein U X Mobilome: prophages, transposons;}	{NA}	{NA}	{NA}
WP_023339954.1	{koy:J415_19770; }	{NA}	{GO:0042626; ATPase activity, coupled to transmembrane movement of substances; molecular_function}	{NA}	{NA}
WP_023339955.1	{koy:J415_19765; }	{NA}	{NA}	{NA}	{NA}
WP_023339956.1	{koc:AB185_24295; K06905 K06905 uncharacterized protein -- }	{YP_007505482; COG3500 Phage protein D X Mobilome: prophages, transposons;}	{NA}	{NA}	{NA}
WP_023340024.1	{kqv:B8P98_15610; }	{NP_930454; COG3673 Uncharacterized protein, PA2063/DUF2235 family S Function unknown ;}	{NA}	{NA}	{NA}
WP_023340028.1	{kqv:B8P98_15590; }	{NP_930454; COG3673 Uncharacterized protein, PA2063/DUF2235 family S Function unknown ;}	{NA}	{NA}	{NA}
WP_023340029.1	{kpa:KPNJ1_03087; }	{NP_930467; COG4104 Zn-binding Pro-Ala-Ala-Arg (PAAR) domain, incolved in TypeVI secretion U Intracellular trafficking, secretion, and vesicular transport ;}	{NA}	{NA}	{NA}
WP_023340092.1	{kgo:CEW81_05915; K02345 holE DNA polymerase III subunit theta 2.7.7.7 Metabolism; Nucleotide metabolism; Purine metabolism [PATH:ko00230] Metabolism; Nucleotide metabolism; Pyrimidine metabolism [PATH:ko00240] Genetic Information Processing; Replication and repair; DNA replication [PATH:ko03030] Genetic Information Processing; Replication and repair; Mismatch repair [PATH:ko03430] Genetic Inform…	{NA}	{GO:0003887; DNA-directed DNA polymerase activity; molecular_function GO:0003677; DNA binding; molecular_function GO:0006260; DNA replication; biological_process}	{NA}	{NA}
WP_023340143.1	{NA}	{NA}	{GO:0003856; 3-dehydroquinate synthase activity; molecular_function GO:0046872; metal ion binding; molecular_function GO:0009073; aromatic amino acid family biosynthetic process; biological_process GO:0016868; intramolecular transferase activity, phosphotransferases; molecular_function GO:0005975; carbohydrate metabolic process; biological_process GO:0016491; oxidoreductase activity; molecular_fu…	{NA}	{NA}
WP_023340176.1	{ron:TE10_15195; }	{YP_004236617; COG2350 Uncharacterized conserved protein YciI, contains a putative active-site phosphohistidine R General function prediction only ;}	{NA}	{NA}	{NA}
WP_023340177.1	{ron:TE10_15185; }	{YP_003884268; COG4977 Transcriptional regulator GlxA family, contains an amidase domain and an AraC-type DNA-binding HTH domain K Transcription ;}	{GO:0000150; recombinase activity; molecular_function GO:0003700; sequence-specific DNA binding transcription factor activity; molecular_function GO:0009236; cobalamin biosynthetic process; biological_process GO:0003677; DNA binding; molecular_function GO:0006310; DNA recombination; biological_process GO:0043565; sequence-specific DNA binding; molecular_function GO:0003824; NA GO:0006355; regulat…	{NA}	{NA}
WP_023340182.1	{psya:AOT82_1890; }	{NA}	{NA}	{NA}	{NA}
WP_023340184.1	{msx:AU14_15390; }	{NA}	{GO:0046872; metal ion binding; molecular_function}	{NA}	{NA}
WP_023340277.1	{kva:Kvar_2266; }	{YP_006817291; COG0604 NADPH:quinone reductase or related Zn-dependent oxidoreductase CR Energy production and conversion ; General function prediction only ;}	{GO:0008270; zinc ion binding; molecular_function GO:0016491; oxidoreductase activity; molecular_function GO:0055114; oxidation-reduction process; biological_process}	{NA}	{NA}
WP_023340278.1	{kva:Kvar_2263; K06889 K06889 uncharacterized protein -- }	{YP_005368820; COG1073 Fermentation-respiration switch protein FrsA, has esterase activity, DUF1100 family T Signal transduction mechanisms ;}	{GO:0016787; hydrolase activity; molecular_function GO:0006508; proteolysis; biological_process GO:0008236; serine-type peptidase activity; molecular_function}	{NA}	{NA}
WP_023340279.1	{kva:Kvar_2262; }	{YP_771180; COG2814 Predicted arabinose efflux permease, MFS family G Carbohydrate transport and metabolism ;}	{GO:0016021; integral to membrane; cellular_component GO:0055085; transmembrane transport; biological_process}	{NA}	{NA}
WP_023340280.1	{kva:Kvar_2261; }	{YP_001418221; COG4221 NADP-dependent 3-hydroxy acid dehydrogenase YdfG C Energy production and conversion ;}	{GO:0006298; mismatch repair; biological_process GO:0008152; NA GO:0016491; oxidoreductase activity; molecular_function GO:0030983; mismatched DNA binding; molecular_function GO:0050662; coenzyme binding; molecular_function GO:0005524; ATP binding; molecular_function GO:0044237; cellular metabolic process; biological_process GO:0003824; NA}	{NA}	{NA}
WP_023340282.1	{kva:Kvar_2259; }	{YP_002000342; COG1917 Cupin domain protein related to quercetin dioxygenase R General function prediction only ;}	{GO:0045735; NA GO:0006355; regulation of transcription, DNA-dependent; biological_process}	{NA}	{NA}
WP_023340284.1	{kva:Kvar_2257; }	{YP_004118013; COG1280 Threonine/homoserine/homoserine lactone efflux protein E Amino acid transport and metabolism ;}	{GO:0016021; integral to membrane; cellular_component GO:0016020; membrane; cellular_component GO:0006865; amino acid transport; biological_process}	{NA}	{NA}
WP_023340285.1	{yal:AT01_3023; }	{NA}	{NA}	{NA}	{NA}
WP_023340288.1	{kva:Kvar_2248; }	{NA}	{NA}	{NA}	{NA}
WP_023340289.1	{kva:Kvar_2247; }	{YP_003343251; COG0833 Amino acid permease E Amino acid transport and metabolism ;}	{GO:0016020; membrane; cellular_component GO:0006810; transport; biological_process GO:0055085; transmembrane transport; biological_process GO:0003333; amino acid transmembrane transport; biological_process GO:0015171; amino acid transmembrane transporter activity; molecular_function}	{NA}	{NA}
WP_023340373.1	{kpo:KPN2242_14290; }	{YP_002237888; COG0741 Soluble lytic murein transglycosylase and related regulatory proteins (some contain LysM/invasin domains) M Cell wall/membrane/envelope biogenesis ;}	{GO:0016998; cell wall macromolecule catabolic process; biological_process}	{NA}	{NA}
WP_023340428.1	{enf:AKI40_0978; }	{NA}	{NA}	{NA}	{NA}
WP_023340431.1	{enf:AKI40_0980; }	{NA}	{GO:0005515; protein binding; molecular_function}	{NA}	{NA}
WP_023340446.1	{ecla:ECNIH3_16480; }	{YP_285420; COG4928 Predicted P-loop ATPase, KAP-like R General function prediction only ;}	{GO:0005524; ATP binding; molecular_function GO:0016887; ATPase activity; molecular_function}	{NA}	{NA}
WP_023340448.1	{ecla:ECNIH3_16470; }	{YP_002130265; COG0603 7-cyano-7-deazaguanine synthase (queuosine biosynthesis) J Translation, ribosomal structure and biogenesis ;}	{NA}	{NA}	{NA}
WP_023340449.1	{ecla:ECNIH3_16465; K03424 tatD TatD DNase family protein 3.1.21.- }	{YP_002130266; COG0084 Tat protein secretion system quality control protein TatD (DNase activity) N Cell motility ;}	{GO:0016888; endodeoxyribonuclease activity, producing 5'-phosphomonoesters; molecular_function}	{NA}	{NA}
WP_023340450.1	{kpe:KPK_1837; }	{YP_002237681; COG4227 Antirestriction protein ArdC L Replication, recombination and repair ;}	{NA}	{NA}	{NA}
WP_023340454.1	{ypa:YPA_1294; K04781 mbtI, irp9, ybtS salicylate synthetase 5.4.4.2 4.2.99.21 Metabolism; Metabolism of terpenoids and polyketides; Biosynthesis of siderophore group nonribosomal peptides [PATH:ko01053] }	{YP_002346907; COG0147 Anthranilate/para-aminobenzoate synthases component I EH Amino acid transport and metabolism ; Coenzyme transport and metabolism ;}	{NA}	{VFG000368; VF0136 Yersiniabactin ybtS salicylate synthase Irp9 One of the major differences between low- and high-pathogenicity Yersinia lies in their ability to capture the iron molecules necessary for their systemic dissemination in the host Yeriniabactin belongs to a small sub-group of phenolate siderophores and has an affinity for ferric iron (KD=4 x 10-36) much higher than for ferrous iron.…	{NA}
WP_023340455.1	{eum:ECUMN_2269; K05373 ybtX, irp8 MFS transporter, putative signal transducer -- }	{NA}	{GO:0055085; transmembrane transport; biological_process GO:0008521; acetyl-CoA transporter activity; molecular_function GO:0016021; integral to membrane; cellular_component}	{VFG000367; VF0136 Yersiniabactin ybtX putative signal transducer One of the major differences between low- and high-pathogenicity Yersinia lies in their ability to capture the iron molecules necessary for their systemic dissemination in the host Yeriniabactin belongs to a small sub-group of phenolate siderophores and has an affinity for ferric iron (KD=4 x 10-36) much higher than for ferrous iro…	{NA}
WP_023340457.1	{ypa:YPA_1289; K04784 irp2, HMWP2 yersiniabactin nonribosomal peptide synthetase -- Metabolism; Metabolism of terpenoids and polyketides; Biosynthesis of siderophore group nonribosomal peptides [PATH:ko01053] }	{YP_002346902; COG3433 Aryl carrier domain Q Secondary metabolites biosynthesis, transport and catabolism ;}	{GO:0008168; methyltransferase activity; molecular_function GO:0008152; NA GO:0003824; NA}	{VFG000363; VF0136 Yersiniabactin irp2 yersiniabactin biosynthetic protein Irp2 One of the major differences between low- and high-pathogenicity Yersinia lies in their ability to capture the iron molecules necessary for their systemic dissemination in the host Yeriniabactin belongs to a small sub-group of phenolate siderophores and has an affinity for ferric iron (KD=4 x 10-36) much higher than f…	{NA}
WP_023340458.1	{ypa:YPA_1288; K04786 irp1, HMWP1 yersiniabactin nonribosomal peptide/polyketide synthase -- Metabolism; Metabolism of terpenoids and polyketides; Biosynthesis of siderophore group nonribosomal peptides [PATH:ko01053] }	{YP_002346901; COG3321 Acyl transferase domain in polyketide synthase (PKS) enzymes Q Secondary metabolites biosynthesis, transport and catabolism ;}	{GO:0009058; biosynthetic process; biological_process GO:0008168; methyltransferase activity; molecular_function GO:0044237; cellular metabolic process; biological_process GO:0008649; rRNA methyltransferase activity; molecular_function GO:0003824; NA GO:0008171; O-methyltransferase activity; molecular_function GO:0016491; oxidoreductase activity; molecular_function GO:0000179; rRNA (adenine-N6,N6…	{VFG000362; VF0136 Yersiniabactin irp1 yersiniabactin biosynthetic protein Irp1 One of the major differences between low- and high-pathogenicity Yersinia lies in their ability to capture the iron molecules necessary for their systemic dissemination in the host Yeriniabactin belongs to a small sub-group of phenolate siderophores and has an affinity for ferric iron (KD=4 x 10-36) much higher than f…	{NA}
WP_023340459.1	{elo:EC042_2216; K05374 irp4, ybtT yersiniabactin synthetase, thioesterase component -- }	{YP_002346899; COG3208 Surfactin synthase thioesterase subunit Q Secondary metabolites biosynthesis, transport and catabolism ;}	{GO:0009058; biosynthetic process; biological_process GO:0016788; hydrolase activity, acting on ester bonds; molecular_function GO:0008152; NA GO:0016787; hydrolase activity; molecular_function}	{VFG034147; CVF458 Yersiniabactin siderophore ybtT yersiniabactin siderophore biosynthetic protein - - - -}	{NA}
[truncated: 133 more rows]

## Sheet: MGH40. unique genes
Gene_id	{KEGG}	{COG}	{GO}	{VFDB}	{ARDB}
Annotation_num	109	46	57	3	0
WP_001560595.1	{NA}	{NA}	{NA}	{NA}	{NA}
WP_004148636.1	{kpa:KPNJ1_02399; }	{NA}	{NA}	{NA}	{NA}
[truncated: 129 more rows]
